# Supplementary material for: The evolution of lexical semantics dynamics, directionality, and drift
Source: Frontiers journal article supplement (doi:10.3389/fcomm.2023.1126249), 2023-05-19
Supplement: Table_4.xlsx [file Table_4.xlsx]

## Sheet: carling_lexeme-meaning-transiti
Lexeme-Id	Meaning	P(0|0)	P(1|0)	P(0|1)	P(1|1)	#(0|0)	#(1|0)	#(0|1)	#(1|1)
82409	to come rushing in	0.986446670595	0.0135533294048	0.999649122807	0.000350877192982	72.7826086957	1	3.21739130435	0.00112930547713
82409	to crack	0.986446670595	0.0135533294048	0.999649122807	0.000350877192982	72.7826086957	1	3.21739130435	0.00112930547713
82409	flow of water from such a place	0.986446670595	0.0135533294048	0.999649122807	0.000350877192982	72.7826086957	1	3.21739130435	0.00112930547713
82409	to be eager	0.986446670595	0.0135533294048	0.999649122807	0.000350877192982	72.7826086957	1	3.21739130435	0.00112930547713
82409	place where water emerges from the ground	0.986446670595	0.0135533294048	0.999649122807	0.000350877192982	72.7826086957	1	3.21739130435	0.00112930547713
82409	to explode	0.986446670595	0.0135533294048	0.999649122807	0.000350877192982	72.7826086957	1	3.21739130435	0.00112930547713
82409	be upset	0.986446670595	0.0135533294048	0.999649122807	0.000350877192982	72.7826086957	1	3.21739130435	0.00112930547713
82409	be impassioned	0.986446670595	0.0135533294048	0.999649122807	0.000350877192982	72.7826086957	1	3.21739130435	0.00112930547713
82409	desire	0.986446670595	0.0135533294048	0.999649122807	0.000350877192982	72.7826086957	1	3.21739130435	0.00112930547713
82409	huddle	0.986446670595	0.0135533294048	0.999649122807	0.000350877192982	72.7826086957	1	3.21739130435	0.00112930547713
82409	to endeavour after	0.971692307692	0.0283076923077	0.99964431798	0.000355682020274	68.652173913	2	6.34782608696	0.00225861095426
82409	to open	0.971692307692	0.0283076923077	0.99964431798	0.000355682020274	68.652173913	2	6.34782608696	0.00225861095426
82409	to grow	0.971692307692	0.0283076923077	0.99964431798	0.000355682020274	68.652173913	2	6.34782608696	0.00225861095426
82409	to dance	0.971692307692	0.0283076923077	0.99964431798	0.000355682020274	68.652173913	2	6.34782608696	0.00225861095426
82409	gush	0.971692307692	0.0283076923077	0.99964431798	0.000355682020274	68.652173913	2	6.34782608696	0.00225861095426
82409	to break	0.955627009646	0.0443729903537	0.999639379733	0.000360620266859	64.6086956522	3	9.39130434783	0.00338791643139
82409	to leap	0.955627009646	0.0443729903537	0.999639379733	0.000360620266859	64.6086956522	3	9.39130434783	0.00338791643139
82409	flow	0.955627009646	0.0443729903537	0.999639379733	0.000360620266859	64.6086956522	3	9.39130434783	0.00338791643139
82409	to spurt out	0.955627009646	0.0443729903537	0.999639379733	0.000360620266859	64.6086956522	3	9.39130434783	0.00338791643139
82409	to run	0.875675675676	0.124324324324	0.999618174876	0.000381825124093	49.3043478261	7	20.6956521739	0.00790513833992
82409	to burst	0.794826048171	0.205173951829	0.999600559217	0.000399440782904	38.7391304348	10	28.2608695652	0.0112930547713
82409	to spring	0.690155440415	0.309844559585	0.999581239531	0.000418760469012	28.9565217391	13	35.0434782609	0.0146809712027
82409	to jump	0.708860759494	0.291139240506	0.999581239531	0.000418760469012	31.652173913	13	32.347826087	0.0135516657256
55909	harvest time	0.987044145873	0.0129558541267	0.999506822292	0.000493177708368	76.1851851852	1	2.81481481481	0.00138888888889
55909	to raise an obstacle against	0.987044145873	0.0129558541267	0.999506822292	0.000493177708368	76.1851851852	1	2.81481481481	0.00138888888889
55909	fishing	0.987044145873	0.0129558541267	0.999506822292	0.000493177708368	76.1851851852	1	2.81481481481	0.00138888888889
55909	meadow	0.987044145873	0.0129558541267	0.999506822292	0.000493177708368	76.1851851852	1	2.81481481481	0.00138888888889
55909	profit or agricultural produce from the tillage of land	0.987044145873	0.0129558541267	0.999506822292	0.000493177708368	76.1851851852	1	2.81481481481	0.00138888888889
55909	hunting	0.987044145873	0.0129558541267	0.999506822292	0.000493177708368	76.1851851852	1	2.81481481481	0.00138888888889
55909	husbandry	0.987044145873	0.0129558541267	0.999506822292	0.000493177708368	76.1851851852	1	2.81481481481	0.00138888888889
55909	fodder	0.987044145873	0.0129558541267	0.999506822292	0.000493177708368	76.1851851852	1	2.81481481481	0.00138888888889
55909	the right to take game	0.987044145873	0.0129558541267	0.999506822292	0.000493177708368	76.1851851852	1	2.81481481481	0.00138888888889
55909	food	0.987044145873	0.0129558541267	0.999506822292	0.000493177708368	76.1851851852	1	2.81481481481	0.00138888888889
55909	crowd of people	0.987044145873	0.0129558541267	0.999506822292	0.000493177708368	76.1851851852	1	2.81481481481	0.00138888888889
55909	to feed	0.987044145873	0.0129558541267	0.999506822292	0.000493177708368	76.1851851852	1	2.81481481481	0.00138888888889
55909	spoils	0.987044145873	0.0129558541267	0.999506822292	0.000493177708368	76.1851851852	1	2.81481481481	0.00138888888889
55909	to chase	0.987044145873	0.0129558541267	0.999506822292	0.000493177708368	76.1851851852	1	2.81481481481	0.00138888888889
55909	herd	0.987044145873	0.0129558541267	0.999506822292	0.000493177708368	76.1851851852	1	2.81481481481	0.00138888888889
55909	game	0.987044145873	0.0129558541267	0.999506822292	0.000493177708368	76.1851851852	1	2.81481481481	0.00138888888889
55909	to graze	0.987044145873	0.0129558541267	0.999506822292	0.000493177708368	76.1851851852	1	2.81481481481	0.00138888888889
55909	to fish	0.987044145873	0.0129558541267	0.999506822292	0.000493177708368	76.1851851852	1	2.81481481481	0.00138888888889
55909	to desire	0.987044145873	0.0129558541267	0.999506822292	0.000493177708368	76.1851851852	1	2.81481481481	0.00138888888889
55909	to poach	0.987044145873	0.0129558541267	0.999506822292	0.000493177708368	76.1851851852	1	2.81481481481	0.00138888888889
55909	wandering	0.987044145873	0.0129558541267	0.999506822292	0.000493177708368	76.1851851852	1	2.81481481481	0.00138888888889
55909	acquisition	0.987044145873	0.0129558541267	0.999506822292	0.000493177708368	76.1851851852	1	2.81481481481	0.00138888888889
55909	to cultivate	0.973134328358	0.0268656716418	0.999500249875	0.000499750124938	72.4444444444	2	5.55555555556	0.00277777777778
55909	livestock	0.973134328358	0.0268656716418	0.999500249875	0.000499750124938	72.4444444444	2	5.55555555556	0.00277777777778
55909	to roam	0.973134328358	0.0268656716418	0.999500249875	0.000499750124938	72.4444444444	2	5.55555555556	0.00277777777778
55909	to use	0.973134328358	0.0268656716418	0.999500249875	0.000499750124938	72.4444444444	2	5.55555555556	0.00277777777778
55909	profit	0.973134328358	0.0268656716418	0.999500249875	0.000499750124938	72.4444444444	2	5.55555555556	0.00277777777778
55909	arable land	0.973134328358	0.0268656716418	0.999500249875	0.000499750124938	72.4444444444	2	5.55555555556	0.00277777777778
55909	to capture	0.973134328358	0.0268656716418	0.999500249875	0.000499750124938	72.4444444444	2	5.55555555556	0.00277777777778
55909	to profit	0.973134328358	0.0268656716418	0.999500249875	0.000499750124938	72.4444444444	2	5.55555555556	0.00277777777778
55909	agricultural produce	0.973134328358	0.0268656716418	0.999500249875	0.000499750124938	72.4444444444	2	5.55555555556	0.00277777777778
55909	to plow	0.958204334365	0.0417956656347	0.999493499916	0.000506500084417	68.7777777778	3	8.22222222222	0.00416666666667
55909	?	0.958204334365	0.0417956656347	0.999493499916	0.000506500084417	68.7777777778	3	8.22222222222	0.00416666666667
55909	to win	0.942184154176	0.0578158458244	0.999486565121	0.000513434879343	65.1851851852	4	10.8148148148	0.00555555555556
71823	sew	0.977020602219	0.0229793977813	0.999483471074	0.00051652892562	42.5172413793	1	1.48275862069	0.000766283524904
71823	twisting	0.977020602219	0.0229793977813	0.999483471074	0.00051652892562	42.5172413793	1	1.48275862069	0.000766283524904
71823	bind	0.977020602219	0.0229793977813	0.999483471074	0.00051652892562	42.5172413793	1	1.48275862069	0.000766283524904
71823	needle	0.977020602219	0.0229793977813	0.999483471074	0.00051652892562	42.5172413793	1	1.48275862069	0.000766283524904
71823	sinew	0.977020602219	0.0229793977813	0.999483471074	0.00051652892562	42.5172413793	1	1.48275862069	0.000766283524904
71823	tie	0.977020602219	0.0229793977813	0.999483471074	0.00051652892562	42.5172413793	1	1.48275862069	0.000766283524904
71823	spinning	0.977020602219	0.0229793977813	0.999483471074	0.00051652892562	42.5172413793	1	1.48275862069	0.000766283524904
71823	to wind together loosely	0.977020602219	0.0229793977813	0.999483471074	0.00051652892562	42.5172413793	1	1.48275862069	0.000766283524904
71823	swim (v)	0.977020602219	0.0229793977813	0.999483471074	0.00051652892562	42.5172413793	1	1.48275862069	0.000766283524904
71823	wind (yarn)	0.977020602219	0.0229793977813	0.999483471074	0.00051652892562	42.5172413793	1	1.48275862069	0.000766283524904
71823	to braid	0.977020602219	0.0229793977813	0.999483471074	0.00051652892562	42.5172413793	1	1.48275862069	0.000766283524904
71823	weave	0.977020602219	0.0229793977813	0.999483471074	0.00051652892562	42.5172413793	1	1.48275862069	0.000766283524904
55909	to gain	0.925	0.075	0.999479437793	0.000520562207184	61.6666666667	5	13.3333333333	0.00694444444444
55909	pasture	0.906574394464	0.0934256055363	0.999472109801	0.000527890198839	58.2222222222	6	15.7777777778	0.00833333333333
71823	(to bend) thread	0.952497952498	0.047502047502	0.99947117927	0.000528820729773	40.1034482759	2	2.89655172414	0.00153256704981
71823	spin	0.952497952498	0.047502047502	0.99947117927	0.000528820729773	40.1034482759	2	2.89655172414	0.00153256704981
71823	to twist	0.952497952498	0.047502047502	0.99947117927	0.000528820729773	40.1034482759	2	2.89655172414	0.00153256704981
71823	to weave	0.869369369369	0.130630630631	0.999430523918	0.000569476082005	33.275862069	5	6.72413793103	0.00383141762452
71823	to sew	0.838440111421	0.161559888579	0.999415546464	0.000584453535944	31.1379310345	6	7.86206896552	0.00459770114943
71823	thread	0.838440111421	0.161559888579	0.999415546464	0.000584453535944	31.1379310345	6	7.86206896552	0.00459770114943
55909	to hunt	0.670731707317	0.329268292683	0.999395526899	0.000604473100947	30.5555555556	15	34.4444444444	0.0208333333333
60000	fowl	0.973958333333	0.0260416666667	0.999375	0.000625	37.4	1	2.6	0.00162601626016
60000	fledged y. chicken	0.973958333333	0.0260416666667	0.999375	0.000625	37.4	1	2.6	0.00162601626016
60000	donkey colt	0.973958333333	0.0260416666667	0.999375	0.000625	37.4	1	2.6	0.00162601626016
60000	y. fowl	0.973958333333	0.0260416666667	0.999375	0.000625	37.4	1	2.6	0.00162601626016
60000	y. hen up to the age of one year	0.973958333333	0.0260416666667	0.999375	0.000625	37.4	1	2.6	0.00162601626016
60000	bird	0.973958333333	0.0260416666667	0.999375	0.000625	37.4	1	2.6	0.00162601626016
60000	louse (lice)	0.973958333333	0.0260416666667	0.999375	0.000625	37.4	1	2.6	0.00162601626016
60000	(vulgar) cock	0.973958333333	0.0260416666667	0.999375	0.000625	37.4	1	2.6	0.00162601626016
60000	young hen	0.973958333333	0.0260416666667	0.999375	0.000625	37.4	1	2.6	0.00162601626016
60000	chicken (meat)	0.973958333333	0.0260416666667	0.999375	0.000625	37.4	1	2.6	0.00162601626016
60000	y. hen	0.973958333333	0.0260416666667	0.999375	0.000625	37.4	1	2.6	0.00162601626016
60000	dick	0.944341372913	0.0556586270872	0.999358563182	0.000641436818473	33.9333333333	2	5.06666666667	0.00325203252033
60000	foal	0.944341372913	0.0556586270872	0.999358563182	0.000641436818473	33.9333333333	2	5.06666666667	0.00325203252033
60000	y. of an animal	0.944341372913	0.0556586270872	0.999358563182	0.000641436818473	33.9333333333	2	5.06666666667	0.00325203252033
60000	chicken meat	0.944341372913	0.0556586270872	0.999358563182	0.000641436818473	33.9333333333	2	5.06666666667	0.00325203252033
60000	cock	0.944341372913	0.0556586270872	0.999358563182	0.000641436818473	33.9333333333	2	5.06666666667	0.00325203252033
60000	y. chicken	0.910714285714	0.0892857142857	0.999341238472	0.000658761528327	30.6	3	7.4	0.00487804878049
60000	chicken (gen.)	0.910714285714	0.0892857142857	0.999341238472	0.000658761528327	30.6	3	7.4	0.00487804878049
60000	pullet	0.910714285714	0.0892857142857	0.999341238472	0.000658761528327	30.6	3	7.4	0.00487804878049
60000	chick	0.910714285714	0.0892857142857	0.999341238472	0.000658761528327	30.6	3	7.4	0.00487804878049
70508	body	0.981226533166	0.0187734668335	0.99930118798	0.000698812019567	52.2666666667	1	1.73333333333	0.00121212121212
70508	flesh	0.981226533166	0.0187734668335	0.99930118798	0.000698812019567	52.2666666667	1	1.73333333333	0.00121212121212
70508	bloody meat	0.981226533166	0.0187734668335	0.99930118798	0.000698812019567	52.2666666667	1	1.73333333333	0.00121212121212
70508	carcass	0.981226533166	0.0187734668335	0.99930118798	0.000698812019567	52.2666666667	1	1.73333333333	0.00121212121212
70508	ungodly	0.981226533166	0.0187734668335	0.99930118798	0.000698812019567	52.2666666667	1	1.73333333333	0.00121212121212
70508	turtle dove	0.981226533166	0.0187734668335	0.99930118798	0.000698812019567	52.2666666667	1	1.73333333333	0.00121212121212
70508	raw meat	0.981226533166	0.0187734668335	0.99930118798	0.000698812019567	52.2666666667	1	1.73333333333	0.00121212121212
70508	foam or sweat of a dying person	0.981226533166	0.0187734668335	0.99930118798	0.000698812019567	52.2666666667	1	1.73333333333	0.00121212121212
70508	bloodshed	0.961240310078	0.0387596899225	0.999287495547	0.000712504453153	49.6	2	3.4	0.00242424242424
70508	remains	0.961240310078	0.0387596899225	0.999287495547	0.000712504453153	49.6	2	3.4	0.00242424242424
70508	moist	0.961240310078	0.0387596899225	0.999287495547	0.000712504453153	49.6	2	3.4	0.00242424242424
70508	rough	0.961240310078	0.0387596899225	0.999287495547	0.000712504453153	49.6	2	3.4	0.00242424242424
70508	gore	0.94	0.06	0.999273255814	0.000726744186047	47.0	3	5.0	0.00363636363636
70508	cruel	0.94	0.06	0.999273255814	0.000726744186047	47.0	3	5.0	0.00363636363636
70508	bloody	0.94	0.06	0.999273255814	0.000726744186047	47.0	3	5.0	0.00363636363636
60000	chicken	0.7265625	0.2734375	0.999261447563	0.000738552437223	18.6	7	15.4	0.0113821138211
70508	corpse	0.868421052632	0.131578947368	0.99922690375	0.000773096250483	39.6	6	9.4	0.00727272727273
84683	rampart	0.968503937008	0.0314960629921	0.999183673469	0.000816326530612	30.75	1	4.25	0.00347222222222
84683	enterprise	0.968503937008	0.0314960629921	0.999183673469	0.000816326530612	30.75	1	4.25	0.00347222222222
84683	earthworks	0.968503937008	0.0314960629921	0.999183673469	0.000816326530612	30.75	1	4.25	0.00347222222222
84683	raw material for making something	0.968503937008	0.0314960629921	0.999183673469	0.000816326530612	30.75	1	4.25	0.00347222222222
84683	piece of work	0.968503937008	0.0314960629921	0.999183673469	0.000816326530612	30.75	1	4.25	0.00347222222222
84683	wood for to use as building material	0.968503937008	0.0314960629921	0.999183673469	0.000816326530612	30.75	1	4.25	0.00347222222222
84683	building	0.968503937008	0.0314960629921	0.999183673469	0.000816326530612	30.75	1	4.25	0.00347222222222
84683	(unprocessed) timber	0.968503937008	0.0314960629921	0.999183673469	0.000816326530612	30.75	1	4.25	0.00347222222222
84683	structure	0.968503937008	0.0314960629921	0.999183673469	0.000816326530612	30.75	1	4.25	0.00347222222222
84683	wood as building material	0.968503937008	0.0314960629921	0.999183673469	0.000816326530612	30.75	1	4.25	0.00347222222222
84683	stronghold	0.968503937008	0.0314960629921	0.999183673469	0.000816326530612	30.75	1	4.25	0.00347222222222
84683	raw material	0.968503937008	0.0314960629921	0.999183673469	0.000816326530612	30.75	1	4.25	0.00347222222222
84683	fort	0.968503937008	0.0314960629921	0.999183673469	0.000816326530612	30.75	1	4.25	0.00347222222222
84683	stuff	0.968503937008	0.0314960629921	0.999183673469	0.000816326530612	30.75	1	4.25	0.00347222222222
84683	embankment	0.968503937008	0.0314960629921	0.999183673469	0.000816326530612	30.75	1	4.25	0.00347222222222
84683	castle	0.968503937008	0.0314960629921	0.999183673469	0.000816326530612	30.75	1	4.25	0.00347222222222
70508	raw	0.784688995215	0.215311004785	0.999174236168	0.000825763831544	32.8	9	13.2	0.0109090909091
84683	deed	0.927927927928	0.0720720720721	0.999158957107	0.000841042893188	25.75	2	8.25	0.00694444444444
84683	labour	0.927927927928	0.0720720720721	0.999158957107	0.000841042893188	25.75	2	8.25	0.00694444444444
84683	act	0.927927927928	0.0720720720721	0.999158957107	0.000841042893188	25.75	2	8.25	0.00694444444444
84683	timber	0.875	0.125	0.999132697311	0.000867302688638	21.0	3	12.0	0.0104166666667
84683	business	0.875	0.125	0.999132697311	0.000867302688638	21.0	3	12.0	0.0104166666667
84683	material	0.875	0.125	0.999132697311	0.000867302688638	21.0	3	12.0	0.0104166666667
84683	work	0.80487804878	0.19512195122	0.999104744852	0.000895255147717	16.5	4	15.5	0.0138888888889
70508	blood	0.654867256637	0.345132743363	0.999091734787	0.000908265213442	24.6666666667	13	17.3333333333	0.0157575757576
67980	strap	0.986229819563	0.0137701804368	0.999034749035	0.000965250965251	71.6206896552	1	2.37931034483	0.00229885057471
67980	human skin	0.986229819563	0.0137701804368	0.999034749035	0.000965250965251	71.6206896552	1	2.37931034483	0.00229885057471
67980	whip	0.986229819563	0.0137701804368	0.999034749035	0.000965250965251	71.6206896552	1	2.37931034483	0.00229885057471
67980	skin, esp. of larger animals	0.986229819563	0.0137701804368	0.999034749035	0.000965250965251	71.6206896552	1	2.37931034483	0.00229885057471
67980	animal skin	0.986229819563	0.0137701804368	0.999034749035	0.000965250965251	71.6206896552	1	2.37931034483	0.00229885057471
67980	rind	0.986229819563	0.0137701804368	0.999034749035	0.000965250965251	71.6206896552	1	2.37931034483	0.00229885057471
67980	skin of larger animals for making leather	0.986229819563	0.0137701804368	0.999034749035	0.000965250965251	71.6206896552	1	2.37931034483	0.00229885057471
67980	onto the skin	0.986229819563	0.0137701804368	0.999034749035	0.000965250965251	71.6206896552	1	2.37931034483	0.00229885057471
67980	skin for making leather	0.986229819563	0.0137701804368	0.999034749035	0.000965250965251	71.6206896552	1	2.37931034483	0.00229885057471
67980	slough of a reptile	0.986229819563	0.0137701804368	0.999034749035	0.000965250965251	71.6206896552	1	2.37931034483	0.00229885057471
67980	lash	0.986229819563	0.0137701804368	0.999034749035	0.000965250965251	71.6206896552	1	2.37931034483	0.00229885057471
67980	bag	0.971554683668	0.0284453163315	0.999020568071	0.000979431929481	68.3103448276	2	4.68965517241	0.00459770114943
67980	skin (person's)	0.971554683668	0.0284453163315	0.999020568071	0.000979431929481	68.3103448276	2	4.68965517241	0.00459770114943
67980	shell	0.971554683668	0.0284453163315	0.999020568071	0.000979431929481	68.3103448276	2	4.68965517241	0.00459770114943
67980	scrotum	0.971554683668	0.0284453163315	0.999020568071	0.000979431929481	68.3103448276	2	4.68965517241	0.00459770114943
67980	peel	0.971554683668	0.0284453163315	0.999020568071	0.000979431929481	68.3103448276	2	4.68965517241	0.00459770114943
67980	skin of an animal, raw or dressed, esp. for making leather	0.971554683668	0.0284453163315	0.999020568071	0.000979431929481	68.3103448276	2	4.68965517241	0.00459770114943
67980	leather thong	0.972472710014	0.0275272899858	0.999020568071	0.000979431929481	70.6551724138	2	2.34482758621	0.00229885057471
71038	Christ	0.981681931724	0.0183180682764	0.999007936508	0.000992063492063	53.5909090909	1	2.40909090909	0.00239234449761
71038	fat (organic substance)	0.981681931724	0.0183180682764	0.999007936508	0.000992063492063	53.5909090909	1	2.40909090909	0.00239234449761
71038	essence	0.981681931724	0.0183180682764	0.999007936508	0.000992063492063	53.5909090909	1	2.40909090909	0.00239234449761
71038	lush	0.981681931724	0.0183180682764	0.999007936508	0.000992063492063	53.5909090909	1	2.40909090909	0.00239234449761
71038	dripping	0.981681931724	0.0183180682764	0.999007936508	0.000992063492063	53.5909090909	1	2.40909090909	0.00239234449761
71038	elegant	0.981681931724	0.0183180682764	0.999007936508	0.000992063492063	53.5909090909	1	2.40909090909	0.00239234449761
71038	anointed	0.981681931724	0.0183180682764	0.999007936508	0.000992063492063	53.5909090909	1	2.40909090909	0.00239234449761
71038	(act of) anointing or perfuming (a corpse)	0.981681931724	0.0183180682764	0.999007936508	0.000992063492063	53.5909090909	1	2.40909090909	0.00239234449761
71038	perfumed oil	0.981681931724	0.0183180682764	0.999007936508	0.000992063492063	53.5909090909	1	2.40909090909	0.00239234449761
71038	rich	0.981681931724	0.0183180682764	0.999007936508	0.000992063492063	53.5909090909	1	2.40909090909	0.00239234449761
71038	make-up	0.981681931724	0.0183180682764	0.999007936508	0.000992063492063	53.5909090909	1	2.40909090909	0.00239234449761
71038	adornment	0.981681931724	0.0183180682764	0.999007936508	0.000992063492063	53.5909090909	1	2.40909090909	0.00239234449761
71038	food	0.981681931724	0.0183180682764	0.999007936508	0.000992063492063	53.5909090909	1	2.40909090909	0.00239234449761
71038	perfumed	0.981681931724	0.0183180682764	0.999007936508	0.000992063492063	53.5909090909	1	2.40909090909	0.00239234449761
71038	to anoint with grease or some other fatty substance	0.981681931724	0.0183180682764	0.999007936508	0.000992063492063	53.5909090909	1	2.40909090909	0.00239234449761
71038	anointment	0.981681931724	0.0183180682764	0.999007936508	0.000992063492063	53.5909090909	1	2.40909090909	0.00239234449761
71038	hardy	0.981681931724	0.0183180682764	0.999007936508	0.000992063492063	53.5909090909	1	2.40909090909	0.00239234449761
71038	dyed	0.981681931724	0.0183180682764	0.999007936508	0.000992063492063	53.5909090909	1	2.40909090909	0.00239234449761
67980	shoe	0.955927051672	0.0440729483283	0.999005964215	0.000994035785288	65.0689655172	3	6.93103448276	0.00689655172414
67980	skin (animal or human)	0.943220753793	0.0567792462066	0.998990918264	0.00100908173562	66.4482758621	4	4.55172413793	0.00459770114943
71038	medicine	0.961739130435	0.0382608695652	0.998988877654	0.0010111223458	50.2727272727	2	4.72727272727	0.00478468899522
71038	fat	0.961739130435	0.0382608695652	0.998988877654	0.0010111223458	50.2727272727	2	4.72727272727	0.00478468899522
71038	oil	0.961739130435	0.0382608695652	0.998988877654	0.0010111223458	50.2727272727	2	4.72727272727	0.00478468899522
71038	lard	0.961739130435	0.0382608695652	0.998988877654	0.0010111223458	50.2727272727	2	4.72727272727	0.00478468899522
71038	perfume	0.940054495913	0.0599455040872	0.998969072165	0.00103092783505	47.0454545455	3	6.95454545455	0.00717703349282
67980	pelt	0.902847571189	0.0971524288107	0.998959417274	0.00104058272633	55.7586206897	6	13.2413793103	0.0137931034483
71038	to smear	0.916508538899	0.0834914611006	0.998948475289	0.00105152471083	43.9090909091	4	9.09090909091	0.00956937799043
71038	to anoint	0.916508538899	0.0834914611006	0.998948475289	0.00105152471083	43.9090909091	4	9.09090909091	0.00956937799043
71038	ointment	0.890981169475	0.109018830525	0.998927038627	0.00107296137339	40.8636363636	5	11.1363636364	0.011961722488
67980	hide	0.822629969419	0.177370030581	0.998890122087	0.00110987791343	46.3793103448	10	18.6206896552	0.0206896551724
75249	soil	0.964730290456	0.0352697095436	0.998810939358	0.00118906064209	27.3529411765	1	1.64705882353	0.00196078431373
75249	root (botanics)	0.964730290456	0.0352697095436	0.998810939358	0.00118906064209	27.3529411765	1	1.64705882353	0.00196078431373
75249	radish	0.964730290456	0.0352697095436	0.998810939358	0.00118906064209	27.3529411765	1	1.64705882353	0.00196078431373
75249	earth	0.964730290456	0.0352697095436	0.998810939358	0.00118906064209	27.3529411765	1	1.64705882353	0.00196078431373
75249	spice	0.964730290456	0.0352697095436	0.998810939358	0.00118906064209	27.3529411765	1	1.64705882353	0.00196078431373
75249	root crop	0.925438596491	0.0745614035088	0.998766954377	0.00123304562269	24.8235294118	2	3.17647058824	0.00392156862745
55089	migrant farm-worker	0.986869747899	0.0131302521008	0.998753561254	0.00124643874644	75.16	1	2.84	0.00354430379747
55089	womanising man	0.986869747899	0.0131302521008	0.998753561254	0.00124643874644	75.16	1	2.84	0.00354430379747
55089	three-year-old ram	0.986869747899	0.0131302521008	0.998753561254	0.00124643874644	75.16	1	2.84	0.00354430379747
55089	ox (orig. bull)	0.986869747899	0.0131302521008	0.998753561254	0.00124643874644	75.16	1	2.84	0.00354430379747
55089	w. ram	0.986869747899	0.0131302521008	0.998753561254	0.00124643874644	75.16	1	2.84	0.00354430379747
55089	stallion	0.986869747899	0.0131302521008	0.998753561254	0.00124643874644	75.16	1	2.84	0.00354430379747
55089	m. animal (bull,stallion)	0.986869747899	0.0131302521008	0.998753561254	0.00124643874644	75.16	1	2.84	0.00354430379747
55089	m. animal (bull, stallion)	0.986869747899	0.0131302521008	0.998753561254	0.00124643874644	75.16	1	2.84	0.00354430379747
55089	(w.) boar	0.986869747899	0.0131302521008	0.998753561254	0.00124643874644	75.16	1	2.84	0.00354430379747
55089	barrow	0.986869747899	0.0131302521008	0.998753561254	0.00124643874644	75.16	1	2.84	0.00354430379747
55089	bull-calf	0.986869747899	0.0131302521008	0.998753561254	0.00124643874644	75.16	1	2.84	0.00354430379747
55089	uncastrated boar	0.986869747899	0.0131302521008	0.998753561254	0.00124643874644	75.16	1	2.84	0.00354430379747
58558	lecher	0.979810725552	0.0201892744479	0.99875	0.00125	48.53125	1	1.46875	0.00183823529412
58558	he-goat	0.979810725552	0.0201892744479	0.99875	0.00125	48.53125	1	1.46875	0.00183823529412
58558	the m. of various animals: esp. deer, goat, hare, rabbit	0.979810725552	0.0201892744479	0.99875	0.00125	48.53125	1	1.46875	0.00183823529412
58558	m. animal, esp. m. goat	0.979810725552	0.0201892744479	0.99875	0.00125	48.53125	1	1.46875	0.00183823529412
58558	young man	0.979810725552	0.0201892744479	0.99875	0.00125	48.53125	1	1.46875	0.00183823529412
58558	m. animal	0.979810725552	0.0201892744479	0.99875	0.00125	48.53125	1	1.46875	0.00183823529412
58558	m. ruminant generally	0.979810725552	0.0201892744479	0.99875	0.00125	48.53125	1	1.46875	0.00183823529412
58558	m. deer	0.979810725552	0.0201892744479	0.99875	0.00125	48.53125	1	1.46875	0.00183823529412
58558	lamb	0.979810725552	0.0201892744479	0.99875	0.00125	48.53125	1	1.46875	0.00183823529412
58558	trestle	0.979810725552	0.0201892744479	0.99875	0.00125	48.53125	1	1.46875	0.00183823529412
58558	heart (organ)	0.979810725552	0.0201892744479	0.99875	0.00125	48.53125	1	1.46875	0.00183823529412
58558	roe-buck	0.979810725552	0.0201892744479	0.99875	0.00125	48.53125	1	1.46875	0.00183823529412
58558	fellow	0.979810725552	0.0201892744479	0.99875	0.00125	48.53125	1	1.46875	0.00183823529412
58558	non-gelding	0.979810725552	0.0201892744479	0.99875	0.00125	48.53125	1	1.46875	0.00183823529412
58558	?	0.979810725552	0.0201892744479	0.99875	0.00125	48.53125	1	1.46875	0.00183823529412
71038	butter	0.648	0.352	0.998748435544	0.00125156445557	22.0909090909	12	22.9090909091	0.0287081339713
55089	pig	0.972752043597	0.0272479564033	0.998735777497	0.00126422250316	71.4	2	5.6	0.00708860759494
55089	calf	0.972752043597	0.0272479564033	0.998735777497	0.00126422250316	71.4	2	5.6	0.00708860759494
55089	ruler	0.97375328084	0.0262467191601	0.998735777497	0.00126422250316	74.2	2	2.8	0.00354430379747
55089	hero	0.97375328084	0.0262467191601	0.998735777497	0.00126422250316	74.2	2	2.8	0.00354430379747
55089	husband	0.97375328084	0.0262467191601	0.998735777497	0.00126422250316	74.2	2	2.8	0.00354430379747
72109	to deform	0.963235294118	0.0367647058824	0.998724489796	0.00127551020408	26.2	1	1.8	0.00229885057471
72109	arrow	0.963235294118	0.0367647058824	0.998724489796	0.00127551020408	26.2	1	1.8	0.00229885057471
72109	to turn around	0.963235294118	0.0367647058824	0.998724489796	0.00127551020408	26.2	1	1.8	0.00229885057471
72109	to dance	0.963235294118	0.0367647058824	0.998724489796	0.00127551020408	26.2	1	1.8	0.00229885057471
58558	roebuck	0.958441558442	0.0415584415584	0.998722860792	0.00127713920817	46.125	2	2.875	0.00367647058824
58558	m. ruminant	0.958441558442	0.0415584415584	0.998722860792	0.00127713920817	46.125	2	2.875	0.00367647058824
75249	plant	0.881944444444	0.118055555556	0.998719590269	0.00128040973111	22.4117647059	3	4.58823529412	0.00588235294118
67980	skin	0.611317944899	0.388682055101	0.998719590269	0.00128040973111	28.3103448276	18	28.6896551724	0.0367816091954
55089	powerful	0.941280093952	0.0587199060482	0.99869864287	0.00130135712958	64.12	4	10.88	0.0141772151899
72109	to turn	0.921671018277	0.0783289817232	0.998675496689	0.00132450331126	23.5333333333	2	3.46666666667	0.00459770114943
72109	spindle	0.921671018277	0.0783289817232	0.998675496689	0.00132450331126	23.5333333333	2	3.46666666667	0.00459770114943
75249	herb	0.834146341463	0.165853658537	0.998668442077	0.00133155792277	20.1176470588	4	5.88235294118	0.0078431372549
58558	buck	0.912087912088	0.0879120879121	0.998664886515	0.00133511348465	41.5	4	5.5	0.00735294117647
55089	man	0.915588069781	0.0844119302195	0.998659260678	0.00134073932197	65.08	6	7.92	0.0106329113924
55089	bull	0.905003166561	0.0949968334389	0.998659260678	0.00134073932197	57.16	6	15.84	0.0212658227848
55089	m. pig	0.905003166561	0.0949968334389	0.998659260678	0.00134073932197	57.16	6	15.84	0.0212658227848
71245	to cause to melt	0.96192893401	0.0380710659898	0.998628257888	0.00137174211248	25.2666666667	1	1.73333333333	0.00238095238095
71245	sentimentality	0.96192893401	0.0380710659898	0.998628257888	0.00137174211248	25.2666666667	1	1.73333333333	0.00238095238095
71245	to melt	0.96192893401	0.0380710659898	0.998628257888	0.00137174211248	25.2666666667	1	1.73333333333	0.00238095238095
71245	dripping	0.96192893401	0.0380710659898	0.998628257888	0.00137174211248	25.2666666667	1	1.73333333333	0.00238095238095
81169	land	0.983615819209	0.016384180791	0.998609566185	0.00139043381535	60.0344827586	1	1.96551724138	0.00273672687466
81169	plot of land	0.983615819209	0.016384180791	0.998609566185	0.00139043381535	60.0344827586	1	1.96551724138	0.00273672687466
81169	land beside river or sea	0.983615819209	0.016384180791	0.998609566185	0.00139043381535	60.0344827586	1	1.96551724138	0.00273672687466
81169	Mother earth	0.983615819209	0.016384180791	0.998609566185	0.00139043381535	60.0344827586	1	1.96551724138	0.00273672687466
81169	plot of land, put to a particular use	0.983615819209	0.016384180791	0.998609566185	0.00139043381535	60.0344827586	1	1.96551724138	0.00273672687466
77513	channel	0.972222222222	0.0277777777778	0.998577524893	0.00142247510669	35.0	1	3.0	0.0042735042735
77513	grave	0.972222222222	0.0277777777778	0.998577524893	0.00142247510669	35.0	1	3.0	0.0042735042735
77513	root	0.972222222222	0.0277777777778	0.998577524893	0.00142247510669	35.0	1	3.0	0.0042735042735
77513	to pull	0.972222222222	0.0277777777778	0.998577524893	0.00142247510669	35.0	1	3.0	0.0042735042735
77513	to tear	0.972222222222	0.0277777777778	0.998577524893	0.00142247510669	35.0	1	3.0	0.0042735042735
77513	scraper	0.972222222222	0.0277777777778	0.998577524893	0.00142247510669	35.0	1	3.0	0.0042735042735
77513	mug	0.972222222222	0.0277777777778	0.998577524893	0.00142247510669	35.0	1	3.0	0.0042735042735
77513	to root	0.972222222222	0.0277777777778	0.998577524893	0.00142247510669	35.0	1	3.0	0.0042735042735
77513	cutting implement	0.972222222222	0.0277777777778	0.998577524893	0.00142247510669	35.0	1	3.0	0.0042735042735
55089	male	0.789110429448	0.210889570552	0.998549523415	0.00145047658516	41.16	11	26.84	0.0389873417722
77513	to tear out	0.939698492462	0.0603015075377	0.998536942209	0.00146305779078	31.1666666667	2	5.83333333333	0.00854700854701
77513	trunk	0.939698492462	0.0603015075377	0.998536942209	0.00146305779078	31.1666666667	2	5.83333333333	0.00854700854701
77513	pit	0.939698492462	0.0603015075377	0.998536942209	0.00146305779078	31.1666666667	2	5.83333333333	0.00854700854701
81169	the world	0.92799503414	0.0720049658597	0.998532433226	0.00146756677429	51.5517241379	4	7.44827586207	0.0109469074986
57026	fool	0.960122699387	0.0398773006135	0.998520710059	0.00147928994083	24.0769230769	1	1.92307692308	0.002849002849
57026	pack-horse	0.960122699387	0.0398773006135	0.998520710059	0.00147928994083	24.0769230769	1	1.92307692308	0.002849002849
57026	saddle	0.960122699387	0.0398773006135	0.998520710059	0.00147928994083	24.0769230769	1	1.92307692308	0.002849002849
57026	support	0.960122699387	0.0398773006135	0.998520710059	0.00147928994083	24.0769230769	1	1.92307692308	0.002849002849
57026	horse	0.960122699387	0.0398773006135	0.998520710059	0.00147928994083	24.0769230769	1	1.92307692308	0.002849002849
57026	to stuff	0.960122699387	0.0398773006135	0.998520710059	0.00147928994083	24.0769230769	1	1.92307692308	0.002849002849
57026	harness	0.960122699387	0.0398773006135	0.998520710059	0.00147928994083	24.0769230769	1	1.92307692308	0.002849002849
57026	beam (bed)	0.960122699387	0.0398773006135	0.998520710059	0.00147928994083	24.0769230769	1	1.92307692308	0.002849002849
57026	burden	0.960122699387	0.0398773006135	0.998520710059	0.00147928994083	24.0769230769	1	1.92307692308	0.002849002849
57026	to equip	0.960122699387	0.0398773006135	0.998520710059	0.00147928994083	24.0769230769	1	1.92307692308	0.002849002849
57026	to compress	0.960122699387	0.0398773006135	0.998520710059	0.00147928994083	24.0769230769	1	1.92307692308	0.002849002849
57026	pack	0.960122699387	0.0398773006135	0.998520710059	0.00147928994083	24.0769230769	1	1.92307692308	0.002849002849
57441	leather bag	0.977800201816	0.0221997981837	0.998517786561	0.00148221343874	44.0454545455	1	1.95454545455	0.00290135396518
57441	net basket	0.977800201816	0.0221997981837	0.998517786561	0.00148221343874	44.0454545455	1	1.95454545455	0.00290135396518
57441	hamper	0.977800201816	0.0221997981837	0.998517786561	0.00148221343874	44.0454545455	1	1.95454545455	0.00290135396518
57441	tousled hair	0.977800201816	0.0221997981837	0.998517786561	0.00148221343874	44.0454545455	1	1.95454545455	0.00290135396518
57441	net	0.977800201816	0.0221997981837	0.998517786561	0.00148221343874	44.0454545455	1	1.95454545455	0.00290135396518
57441	fur bag	0.977800201816	0.0221997981837	0.998517786561	0.00148221343874	44.0454545455	1	1.95454545455	0.00290135396518
57441	wooden box	0.977800201816	0.0221997981837	0.998517786561	0.00148221343874	44.0454545455	1	1.95454545455	0.00290135396518
57441	a frame to carry on the back	0.977800201816	0.0221997981837	0.998517786561	0.00148221343874	44.0454545455	1	1.95454545455	0.00290135396518
57441	s. bag	0.977800201816	0.0221997981837	0.998517786561	0.00148221343874	44.0454545455	1	1.95454545455	0.00290135396518
57441	fleece	0.977800201816	0.0221997981837	0.998517786561	0.00148221343874	44.0454545455	1	1.95454545455	0.00290135396518
57441	net stretched on frame on which corn is dried	0.977800201816	0.0221997981837	0.998517786561	0.00148221343874	44.0454545455	1	1.95454545455	0.00290135396518
57441	amount of corn	0.977800201816	0.0221997981837	0.998517786561	0.00148221343874	44.0454545455	1	1.95454545455	0.00290135396518
57441	pannier	0.977800201816	0.0221997981837	0.998517786561	0.00148221343874	44.0454545455	1	1.95454545455	0.00290135396518
84584	undergrowth	0.977880184332	0.0221198156682	0.998517786561	0.00148221343874	44.2083333333	1	1.79166666667	0.00265957446809
84584	bundle	0.977880184332	0.0221198156682	0.998517786561	0.00148221343874	44.2083333333	1	1.79166666667	0.00265957446809
84584	wood (forest)	0.977880184332	0.0221198156682	0.998517786561	0.00148221343874	44.2083333333	1	1.79166666667	0.00265957446809
84584	scrub	0.977880184332	0.0221198156682	0.998517786561	0.00148221343874	44.2083333333	1	1.79166666667	0.00265957446809
84584	thicket	0.977880184332	0.0221198156682	0.998517786561	0.00148221343874	44.2083333333	1	1.79166666667	0.00265957446809
84584	copse	0.977880184332	0.0221198156682	0.998517786561	0.00148221343874	44.2083333333	1	1.79166666667	0.00265957446809
81169	ground	0.907170294494	0.0928297055058	0.998504784689	0.001495215311	48.8620689655	5	9.13793103448	0.0136836343733
76964	(act of) to cut	0.990487514863	0.00951248513674	0.998492613808	0.00150738619234	104.125	1	2.875	0.00434027777778
76964	shave	0.990487514863	0.00951248513674	0.998492613808	0.00150738619234	104.125	1	2.875	0.00434027777778
76964	to mow	0.990487514863	0.00951248513674	0.998492613808	0.00150738619234	104.125	1	2.875	0.00434027777778
76964	to scratch	0.990487514863	0.00951248513674	0.998492613808	0.00150738619234	104.125	1	2.875	0.00434027777778
76964	rip	0.990487514863	0.00951248513674	0.998492613808	0.00150738619234	104.125	1	2.875	0.00434027777778
76964	drain	0.990487514863	0.00951248513674	0.998492613808	0.00150738619234	104.125	1	2.875	0.00434027777778
76964	to cut off	0.990487514863	0.00951248513674	0.998492613808	0.00150738619234	104.125	1	2.875	0.00434027777778
76964	surgery	0.990487514863	0.00951248513674	0.998492613808	0.00150738619234	104.125	1	2.875	0.00434027777778
76964	ditch	0.990487514863	0.00951248513674	0.998492613808	0.00150738619234	104.125	1	2.875	0.00434027777778
76964	sculpting in wood	0.990487514863	0.00951248513674	0.998492613808	0.00150738619234	104.125	1	2.875	0.00434027777778
76964	cut	0.990487514863	0.00951248513674	0.998492613808	0.00150738619234	104.125	1	2.875	0.00434027777778
76964	to cut (off)	0.990487514863	0.00951248513674	0.998492613808	0.00150738619234	104.125	1	2.875	0.00434027777778
76964	weaver?s instrument	0.990487514863	0.00951248513674	0.998492613808	0.00150738619234	104.125	1	2.875	0.00434027777778
76964	harvesting tool	0.990487514863	0.00951248513674	0.998492613808	0.00150738619234	104.125	1	2.875	0.00434027777778
76964	(pair of) scissors	0.990487514863	0.00951248513674	0.998492613808	0.00150738619234	104.125	1	2.875	0.00434027777778
76964	to reap	0.990487514863	0.00951248513674	0.998492613808	0.00150738619234	104.125	1	2.875	0.00434027777778
76964	(sheep) slaughter	0.990487514863	0.00951248513674	0.998492613808	0.00150738619234	104.125	1	2.875	0.00434027777778
76964	slaughter	0.990487514863	0.00951248513674	0.998492613808	0.00150738619234	104.125	1	2.875	0.00434027777778
76964	act of to cut	0.990487514863	0.00951248513674	0.998492613808	0.00150738619234	104.125	1	2.875	0.00434027777778
76964	felling of timber	0.990487514863	0.00951248513674	0.998492613808	0.00150738619234	104.125	1	2.875	0.00434027777778
76964	to carve	0.990487514863	0.00951248513674	0.998492613808	0.00150738619234	104.125	1	2.875	0.00434027777778
76964	dart	0.990487514863	0.00951248513674	0.998492613808	0.00150738619234	104.125	1	2.875	0.00434027777778
76964	to cutlass	0.990487514863	0.00951248513674	0.998492613808	0.00150738619234	104.125	1	2.875	0.00434027777778
76964	score in wood	0.990487514863	0.00951248513674	0.998492613808	0.00150738619234	104.125	1	2.875	0.00434027777778
76964	tear	0.990487514863	0.00951248513674	0.998492613808	0.00150738619234	104.125	1	2.875	0.00434027777778
76964	to skim	0.990487514863	0.00951248513674	0.998492613808	0.00150738619234	104.125	1	2.875	0.00434027777778
76964	to cut wool from sheep or other animals	0.990487514863	0.00951248513674	0.998492613808	0.00150738619234	104.125	1	2.875	0.00434027777778
76964	sharp edge	0.990487514863	0.00951248513674	0.998492613808	0.00150738619234	104.125	1	2.875	0.00434027777778
76964	knives	0.990487514863	0.00951248513674	0.998492613808	0.00150738619234	104.125	1	2.875	0.00434027777778
76964	arrow	0.990487514863	0.00951248513674	0.998492613808	0.00150738619234	104.125	1	2.875	0.00434027777778
76964	projectile	0.990487514863	0.00951248513674	0.998492613808	0.00150738619234	104.125	1	2.875	0.00434027777778
76964	piece	0.990487514863	0.00951248513674	0.998492613808	0.00150738619234	104.125	1	2.875	0.00434027777778
57441	ram	0.953684210526	0.0463157894737	0.998482549317	0.00151745068285	41.1818181818	2	3.81818181818	0.00580270793037
57441	ewe	0.953684210526	0.0463157894737	0.998482549317	0.00151745068285	41.1818181818	2	3.81818181818	0.00580270793037
57441	wicker basket, esp. for carrying on the back	0.953684210526	0.0463157894737	0.998482549317	0.00151745068285	41.1818181818	2	3.81818181818	0.00580270793037
57441	bag made from skin	0.953684210526	0.0463157894737	0.998482549317	0.00151745068285	41.1818181818	2	3.81818181818	0.00580270793037
57441	fur	0.953684210526	0.0463157894737	0.998482549317	0.00151745068285	41.1818181818	2	3.81818181818	0.00580270793037
57441	basket	0.953684210526	0.0463157894737	0.998482549317	0.00151745068285	41.1818181818	2	3.81818181818	0.00580270793037
84584	s. forest	0.954022988506	0.0459770114943	0.998482549317	0.00151745068285	41.5	2	3.5	0.00531914893617
76964	notch	0.980452046426	0.0195479535736	0.998476074368	0.00152392563243	100.3125	2	5.6875	0.00868055555556
76964	to separate	0.980452046426	0.0195479535736	0.998476074368	0.00152392563243	100.3125	2	5.6875	0.00868055555556
76964	cutting	0.980452046426	0.0195479535736	0.998476074368	0.00152392563243	100.3125	2	5.6875	0.00868055555556
76964	furrow	0.980452046426	0.0195479535736	0.998476074368	0.00152392563243	100.3125	2	5.6875	0.00868055555556
76964	to slaughter	0.980452046426	0.0195479535736	0.998476074368	0.00152392563243	100.3125	2	5.6875	0.00868055555556
76964	to split	0.980980683507	0.0190193164933	0.998476074368	0.00152392563243	103.15625	2	2.84375	0.00434027777778
81169	soil	0.885148514851	0.114851485149	0.998476074368	0.00152392563243	46.2413793103	6	10.7586206897	0.0164203612479
73459	fodder	0.984348798211	0.0156512017887	0.998461538462	0.00153846153846	62.8928571429	1	2.10714285714	0.00324675324675
73459	surface	0.984348798211	0.0156512017887	0.998461538462	0.00153846153846	62.8928571429	1	2.10714285714	0.00324675324675
73459	(pop.	0.984348798211	0.0156512017887	0.998461538462	0.00153846153846	62.8928571429	1	2.10714285714	0.00324675324675
73459	cereal used as fodder (gen. especially in plural)	0.984348798211	0.0156512017887	0.998461538462	0.00153846153846	62.8928571429	1	2.10714285714	0.00324675324675
73459	bloom	0.984348798211	0.0156512017887	0.998461538462	0.00153846153846	62.8928571429	1	2.10714285714	0.00324675324675
73459	interest	0.984348798211	0.0156512017887	0.998461538462	0.00153846153846	62.8928571429	1	2.10714285714	0.00324675324675
73459	plant	0.984348798211	0.0156512017887	0.998461538462	0.00153846153846	62.8928571429	1	2.10714285714	0.00324675324675
73459	blade-shaped tool	0.984348798211	0.0156512017887	0.998461538462	0.00153846153846	62.8928571429	1	2.10714285714	0.00324675324675
73459	cereal especially oats	0.984348798211	0.0156512017887	0.998461538462	0.00153846153846	62.8928571429	1	2.10714285714	0.00324675324675
73459	leaf (botanics)	0.984348798211	0.0156512017887	0.998461538462	0.00153846153846	62.8928571429	1	2.10714285714	0.00324675324675
73459	fruit of the field	0.984348798211	0.0156512017887	0.998461538462	0.00153846153846	62.8928571429	1	2.10714285714	0.00324675324675
73459	flowers	0.984348798211	0.0156512017887	0.998461538462	0.00153846153846	62.8928571429	1	2.10714285714	0.00324675324675
73459	oats	0.984348798211	0.0156512017887	0.998461538462	0.00153846153846	62.8928571429	1	2.10714285714	0.00324675324675
73459	(gen. especially in plural) grain	0.984348798211	0.0156512017887	0.998461538462	0.00153846153846	62.8928571429	1	2.10714285714	0.00324675324675
73459	yield	0.984348798211	0.0156512017887	0.998461538462	0.00153846153846	62.8928571429	1	2.10714285714	0.00324675324675
73459	profit	0.984348798211	0.0156512017887	0.998461538462	0.00153846153846	62.8928571429	1	2.10714285714	0.00324675324675
73459	tongue	0.984348798211	0.0156512017887	0.998461538462	0.00153846153846	62.8928571429	1	2.10714285714	0.00324675324675
73459	grass	0.984348798211	0.0156512017887	0.998461538462	0.00153846153846	62.8928571429	1	2.10714285714	0.00324675324675
73459	warm (of weather)	0.984348798211	0.0156512017887	0.998461538462	0.00153846153846	62.8928571429	1	2.10714285714	0.00324675324675
73459	grape	0.984348798211	0.0156512017887	0.998461538462	0.00153846153846	62.8928571429	1	2.10714285714	0.00324675324675
76964	to divide	0.969868173258	0.030131826742	0.998459167951	0.00154083204931	96.5625	3	8.4375	0.0130208333333
57026	mule	0.914191419142	0.0858085808581	0.998459167951	0.00154083204931	21.3076923077	2	3.69230769231	0.00569800569801
55089	boar	0.665178571429	0.334821428571	0.99844789357	0.00155210643016	29.8	15	34.2	0.053164556962
81169	earth	0.861904761905	0.138095238095	0.998446239901	0.00155376009944	43.6896551724	7	12.3103448276	0.0191570881226
73459	blossom	0.96766743649	0.0323325635104	0.998435054773	0.00156494522692	59.8571428571	2	4.14285714286	0.00649350649351
73459	grain	0.96766743649	0.0323325635104	0.998435054773	0.00156494522692	59.8571428571	2	4.14285714286	0.00649350649351
74904	semolina	0.980281690141	0.0197183098592	0.998430141287	0.00156985871272	49.7142857143	1	2.28571428571	0.00359389038634
74904	soil	0.980281690141	0.0197183098592	0.998430141287	0.00156985871272	49.7142857143	1	2.28571428571	0.00359389038634
74904	stony soil around a sett	0.980281690141	0.0197183098592	0.998430141287	0.00156985871272	49.7142857143	1	2.28571428571	0.00359389038634
74904	earth	0.980281690141	0.0197183098592	0.998430141287	0.00156985871272	49.7142857143	1	2.28571428571	0.00359389038634
74904	stony soil especially around a badger sett	0.980281690141	0.0197183098592	0.998430141287	0.00156985871272	49.7142857143	1	2.28571428571	0.00359389038634
74904	sandstone	0.980281690141	0.0197183098592	0.998430141287	0.00156985871272	49.7142857143	1	2.28571428571	0.00359389038634
74904	(kind of) stone	0.980281690141	0.0197183098592	0.998430141287	0.00156985871272	49.7142857143	1	2.28571428571	0.00359389038634
74904	groats	0.980281690141	0.0197183098592	0.998430141287	0.00156985871272	49.7142857143	1	2.28571428571	0.00359389038634
74904	(coll.) stone	0.980281690141	0.0197183098592	0.998430141287	0.00156985871272	49.7142857143	1	2.28571428571	0.00359389038634
74904	fox den	0.980281690141	0.0197183098592	0.998430141287	0.00156985871272	49.7142857143	1	2.28571428571	0.00359389038634
74904	grain of sand	0.980281690141	0.0197183098592	0.998430141287	0.00156985871272	49.7142857143	1	2.28571428571	0.00359389038634
74904	particle	0.980281690141	0.0197183098592	0.998430141287	0.00156985871272	49.7142857143	1	2.28571428571	0.00359389038634
74904	crushed grain	0.980281690141	0.0197183098592	0.998430141287	0.00156985871272	49.7142857143	1	2.28571428571	0.00359389038634
74904	oatmeal	0.980281690141	0.0197183098592	0.998430141287	0.00156985871272	49.7142857143	1	2.28571428571	0.00359389038634
74904	crushed oats	0.980281690141	0.0197183098592	0.998430141287	0.00156985871272	49.7142857143	1	2.28571428571	0.00359389038634
74904	ground rice	0.980281690141	0.0197183098592	0.998430141287	0.00156985871272	49.7142857143	1	2.28571428571	0.00359389038634
74904	badger sett	0.980281690141	0.0197183098592	0.998430141287	0.00156985871272	49.7142857143	1	2.28571428571	0.00359389038634
76964	to shave	0.946949602122	0.053050397878	0.998424204223	0.00157579577687	89.25	5	13.75	0.0217013888889
84930	shrub(s)	0.971736204576	0.028263795424	0.998412698413	0.0015873015873	34.380952381	1	1.61904761905	0.002574002574
84930	fence	0.971736204576	0.028263795424	0.998412698413	0.0015873015873	34.380952381	1	1.61904761905	0.002574002574
84930	centre	0.971736204576	0.028263795424	0.998412698413	0.0015873015873	34.380952381	1	1.61904761905	0.002574002574
84930	grove	0.971736204576	0.028263795424	0.998412698413	0.0015873015873	34.380952381	1	1.61904761905	0.002574002574
84930	(dial.) little forest	0.971736204576	0.028263795424	0.998412698413	0.0015873015873	34.380952381	1	1.61904761905	0.002574002574
84930	alley	0.971736204576	0.028263795424	0.998412698413	0.0015873015873	34.380952381	1	1.61904761905	0.002574002574
84930	mulberry	0.971736204576	0.028263795424	0.998412698413	0.0015873015873	34.380952381	1	1.61904761905	0.002574002574
84930	forest	0.971736204576	0.028263795424	0.998412698413	0.0015873015873	34.380952381	1	1.61904761905	0.002574002574
84930	unplowed strip of land	0.971736204576	0.028263795424	0.998412698413	0.0015873015873	34.380952381	1	1.61904761905	0.002574002574
73459	sheet	0.949910554562	0.0500894454383	0.998407643312	0.0015923566879	56.8928571429	3	6.10714285714	0.00974025974026
73459	harvest	0.949910554562	0.0500894454383	0.998407643312	0.0015923566879	56.8928571429	3	6.10714285714	0.00974025974026
73459	agricultural produce	0.949910554562	0.0500894454383	0.998407643312	0.0015923566879	56.8928571429	3	6.10714285714	0.00974025974026
84584	s. wood	0.900826446281	0.099173553719	0.998406797663	0.0015932023367	36.3333333333	4	6.66666666667	0.0106382978723
76964	to shear	0.934560327198	0.0654396728016	0.998406120497	0.00159387950271	85.6875	6	16.3125	0.0260416666667
77513	snout	0.805194805195	0.194805194805	0.9984	0.0016	20.6666666667	5	13.3333333333	0.0213675213675
92513	mountain	0.959016393443	0.0409836065574	0.9984	0.0016	23.4	1	1.6	0.0025641025641
92513	arable land	0.959016393443	0.0409836065574	0.9984	0.0016	23.4	1	1.6	0.0025641025641
92513	ground	0.959016393443	0.0409836065574	0.9984	0.0016	23.4	1	1.6	0.0025641025641
92513	woods/forest	0.959016393443	0.0409836065574	0.9984	0.0016	23.4	1	1.6	0.0025641025641
92513	worm	0.959016393443	0.0409836065574	0.9984	0.0016	23.4	1	1.6	0.0025641025641
92513	mountain (not hill)	0.959016393443	0.0409836065574	0.9984	0.0016	23.4	1	1.6	0.0025641025641
92513	forest	0.959016393443	0.0409836065574	0.9984	0.0016	23.4	1	1.6	0.0025641025641
92513	village	0.959016393443	0.0409836065574	0.9984	0.0016	23.4	1	1.6	0.0025641025641
92513	corner	0.959016393443	0.0409836065574	0.9984	0.0016	23.4	1	1.6	0.0025641025641
92513	settlement	0.959016393443	0.0409836065574	0.9984	0.0016	23.4	1	1.6	0.0025641025641
92513	bank	0.959016393443	0.0409836065574	0.9984	0.0016	23.4	1	1.6	0.0025641025641
92513	meadow	0.959016393443	0.0409836065574	0.9984	0.0016	23.4	1	1.6	0.0025641025641
74904	clod	0.958783120707	0.0412168792934	0.998396793587	0.00160320641283	46.5238095238	2	4.47619047619	0.00718778077269
74904	lair	0.958783120707	0.0412168792934	0.998396793587	0.00160320641283	46.5238095238	2	4.47619047619	0.00718778077269
74904	lump	0.958783120707	0.0412168792934	0.998396793587	0.00160320641283	46.5238095238	2	4.47619047619	0.00718778077269
74904	grain (singulative)	0.958783120707	0.0412168792934	0.998396793587	0.00160320641283	46.5238095238	2	4.47619047619	0.00718778077269
74904	burrow	0.958783120707	0.0412168792934	0.998396793587	0.00160320641283	46.5238095238	2	4.47619047619	0.00718778077269
74904	den	0.958783120707	0.0412168792934	0.998396793587	0.00160320641283	46.5238095238	2	4.47619047619	0.00718778077269
57026	load	0.86170212766	0.13829787234	0.998392282958	0.0016077170418	18.6923076923	3	5.30769230769	0.00854700854701
81169	plain	0.811688311688	0.188311688312	0.998382923674	0.001617076326	38.7931034483	9	15.2068965517	0.0246305418719
73459	blade	0.931034482759	0.0689655172414	0.998379254457	0.00162074554295	54.0	4	8.0	0.012987012987
73459	cereal	0.931034482759	0.0689655172414	0.998379254457	0.00162074554295	54.0	4	8.0	0.012987012987
73459	page	0.931034482759	0.0689655172414	0.998379254457	0.00162074554295	54.0	4	8.0	0.012987012987
57441	wine-skin	0.868891537545	0.131108462455	0.998366013072	0.0016339869281	33.1363636364	5	8.86363636364	0.0145067698259
84930	tree	0.940928270042	0.0590717299578	0.998364677024	0.00163532297629	31.8571428571	2	3.14285714286	0.00514800514801
84930	located in the middle	0.940928270042	0.0590717299578	0.998364677024	0.00163532297629	31.8571428571	2	3.14285714286	0.00514800514801
84930	woods (forest)	0.940928270042	0.0590717299578	0.998364677024	0.00163532297629	31.8571428571	2	3.14285714286	0.00514800514801
74904	grit	0.935384615385	0.0646153846154	0.998361998362	0.001638001638	43.4285714286	3	6.57142857143	0.010781671159
74904	stone	0.935384615385	0.0646153846154	0.998361998362	0.001638001638	43.4285714286	3	6.57142857143	0.010781671159
92513	land	0.912790697674	0.0872093023256	0.998330550918	0.0016694490818	20.9333333333	2	3.06666666667	0.00512820512821
92513	outskirts	0.912790697674	0.0872093023256	0.998330550918	0.0016694490818	20.9333333333	2	3.06666666667	0.00512820512821
92513	estate	0.912790697674	0.0872093023256	0.998330550918	0.0016694490818	20.9333333333	2	3.06666666667	0.00512820512821
92513	to be on the surface of something	0.912790697674	0.0872093023256	0.998330550918	0.0016694490818	20.9333333333	2	3.06666666667	0.00512820512821
92513	part	0.912790697674	0.0872093023256	0.998330550918	0.0016694490818	20.9333333333	2	3.06666666667	0.00512820512821
76964	to cut	0.87814166032	0.12185833968	0.998329435349	0.00167056465085	72.0625	10	25.9375	0.0434027777778
84584	forest	0.84	0.16	0.998323085523	0.00167691447736	31.5	6	9.5	0.0159574468085
57441	bag	0.836228287841	0.163771712159	0.998323085523	0.00167691447736	30.6363636364	6	10.3636363636	0.0174081237911
73459	leaf	0.889763779528	0.110236220472	0.998319327731	0.00168067226891	48.4285714286	6	11.5714285714	0.0194805194805
71546	to fashion	0.990368804322	0.00963119567771	0.998306878307	0.00169312169312	102.829268293	1	2.17073170732	0.00368154624942
71546	to hammer	0.990368804322	0.00963119567771	0.998306878307	0.00169312169312	102.829268293	1	2.17073170732	0.00368154624942
71546	gauze	0.990368804322	0.00963119567771	0.998306878307	0.00169312169312	102.829268293	1	2.17073170732	0.00368154624942
71546	hammer axe	0.990368804322	0.00963119567771	0.998306878307	0.00169312169312	102.829268293	1	2.17073170732	0.00368154624942
71546	thin woven fabric	0.990368804322	0.00963119567771	0.998306878307	0.00169312169312	102.829268293	1	2.17073170732	0.00368154624942
71546	a rich kind of cloth	0.990368804322	0.00963119567771	0.998306878307	0.00169312169312	102.829268293	1	2.17073170732	0.00368154624942
71546	fashion	0.990368804322	0.00963119567771	0.998306878307	0.00169312169312	102.829268293	1	2.17073170732	0.00368154624942
71546	undertake	0.990368804322	0.00963119567771	0.998306878307	0.00169312169312	102.829268293	1	2.17073170732	0.00368154624942
71546	simply woven material	0.990368804322	0.00963119567771	0.998306878307	0.00169312169312	102.829268293	1	2.17073170732	0.00368154624942
71546	dress	0.990368804322	0.00963119567771	0.998306878307	0.00169312169312	102.829268293	1	2.17073170732	0.00368154624942
71546	belt	0.990368804322	0.00963119567771	0.998306878307	0.00169312169312	102.829268293	1	2.17073170732	0.00368154624942
71546	to devise	0.990368804322	0.00963119567771	0.998306878307	0.00169312169312	102.829268293	1	2.17073170732	0.00368154624942
71546	hoe	0.990368804322	0.00963119567771	0.998306878307	0.00169312169312	102.829268293	1	2.17073170732	0.00368154624942
71546	to spin	0.990368804322	0.00963119567771	0.998306878307	0.00169312169312	102.829268293	1	2.17073170732	0.00368154624942
71546	sail	0.990368804322	0.00963119567771	0.998306878307	0.00169312169312	102.829268293	1	2.17073170732	0.00368154624942
71546	construct	0.990368804322	0.00963119567771	0.998306878307	0.00169312169312	102.829268293	1	2.17073170732	0.00368154624942
71546	(spider's) web	0.990368804322	0.00963119567771	0.998306878307	0.00169312169312	102.829268293	1	2.17073170732	0.00368154624942
71546	to bend	0.990368804322	0.00963119567771	0.998306878307	0.00169312169312	102.829268293	1	2.17073170732	0.00368154624942
71546	to break flax	0.990368804322	0.00963119567771	0.998306878307	0.00169312169312	102.829268293	1	2.17073170732	0.00368154624942
71546	s. axe	0.990368804322	0.00963119567771	0.998306878307	0.00169312169312	102.829268293	1	2.17073170732	0.00368154624942
71546	cinema screen	0.990368804322	0.00963119567771	0.998306878307	0.00169312169312	102.829268293	1	2.17073170732	0.00368154624942
71546	form	0.990368804322	0.00963119567771	0.998306878307	0.00169312169312	102.829268293	1	2.17073170732	0.00368154624942
71546	to interlace	0.990368804322	0.00963119567771	0.998306878307	0.00169312169312	102.829268293	1	2.17073170732	0.00368154624942
71546	woven material of cotton or linen	0.990368804322	0.00963119567771	0.998306878307	0.00169312169312	102.829268293	1	2.17073170732	0.00368154624942
71546	complex situation	0.990368804322	0.00963119567771	0.998306878307	0.00169312169312	102.829268293	1	2.17073170732	0.00368154624942
71546	collection of specialised cells of which animals or plants are made	0.990368804322	0.00963119567771	0.998306878307	0.00169312169312	102.829268293	1	2.17073170732	0.00368154624942
71546	loom	0.990368804322	0.00963119567771	0.998306878307	0.00169312169312	102.829268293	1	2.17073170732	0.00368154624942
71546	woven headband	0.990368804322	0.00963119567771	0.998306878307	0.00169312169312	102.829268293	1	2.17073170732	0.00368154624942
71546	cooper?s adze or axe	0.990368804322	0.00963119567771	0.998306878307	0.00169312169312	102.829268293	1	2.17073170732	0.00368154624942
71546	any woven fabric	0.990368804322	0.00963119567771	0.998306878307	0.00169312169312	102.829268293	1	2.17073170732	0.00368154624942
71546	weave (noun)	0.990368804322	0.00963119567771	0.998306878307	0.00169312169312	102.829268293	1	2.17073170732	0.00368154624942
71245	melted fat	0.69387755102	0.30612244898	0.998302207131	0.00169779286927	13.6	6	8.4	0.0142857142857
71546	spider's web	0.980335731415	0.0196642685851	0.998287671233	0.00171232876712	99.7073170732	2	4.29268292683	0.00736309249885
71546	to hew	0.980335731415	0.0196642685851	0.998287671233	0.00171232876712	99.7073170732	2	4.29268292683	0.00736309249885
71546	intrigue	0.980335731415	0.0196642685851	0.998287671233	0.00171232876712	99.7073170732	2	4.29268292683	0.00736309249885
71546	painting	0.980335731415	0.0196642685851	0.998287671233	0.00171232876712	99.7073170732	2	4.29268292683	0.00736309249885
84930	balk	0.871362940276	0.128637059724	0.998259355962	0.00174064403829	27.0952380952	4	5.90476190476	0.010296010296
84930	border	0.871362940276	0.128637059724	0.998259355962	0.00174064403829	27.0952380952	4	5.90476190476	0.010296010296
84930	boundary	0.871362940276	0.128637059724	0.998259355962	0.00174064403829	27.0952380952	4	5.90476190476	0.010296010296
92513	field	0.861111111111	0.138888888889	0.998254799302	0.00174520069808	18.6	3	4.4	0.00769230769231
74904	sand	0.852631578947	0.147368421053	0.998247919404	0.00175208059571	34.7142857143	6	12.2857142857	0.0215633423181
76964	scissors	0.809361702128	0.190638297872	0.998244998245	0.001755001755	59.4375	14	34.5625	0.0607638888889
77513	to dig	0.593220338983	0.406779661017	0.998234774934	0.0017652250662	11.6666666667	8	19.3333333333	0.034188034188
57441	bellows	0.764075067024	0.235924932976	0.998230088496	0.00176991150442	25.9090909091	8	13.0909090909	0.0232108317215
71546	textile	0.947717419026	0.0522825809742	0.998227343231	0.00177265676933	90.6341463415	5	10.3658536585	0.0184077312471
73459	flower	0.818574514039	0.181425485961	0.998220640569	0.0017793594306	40.6071428571	9	16.3928571429	0.0292207792208
85550	glen	0.969574036511	0.0304259634888	0.998217468806	0.0017825311943	31.8666666667	1	2.13333333333	0.00380952380952
85550	steep coastal cliff	0.969574036511	0.0304259634888	0.998217468806	0.0017825311943	31.8666666667	1	2.13333333333	0.00380952380952
85550	coastal cliff	0.969574036511	0.0304259634888	0.998217468806	0.0017825311943	31.8666666667	1	2.13333333333	0.00380952380952
85550	large and steep rock	0.969574036511	0.0304259634888	0.998217468806	0.0017825311943	31.8666666667	1	2.13333333333	0.00380952380952
85550	hill	0.969574036511	0.0304259634888	0.998217468806	0.0017825311943	31.8666666667	1	2.13333333333	0.00380952380952
85550	precipice	0.969574036511	0.0304259634888	0.998217468806	0.0017825311943	31.8666666667	1	2.13333333333	0.00380952380952
85550	weaver?s stone	0.969574036511	0.0304259634888	0.998217468806	0.0017825311943	31.8666666667	1	2.13333333333	0.00380952380952
85550	peak	0.969574036511	0.0304259634888	0.998217468806	0.0017825311943	31.8666666667	1	2.13333333333	0.00380952380952
71546	canvas	0.935970848516	0.0640291514836	0.998206278027	0.00179372197309	87.7073170732	6	12.2926829268	0.0220892774965
72109	to curve	0.488636363636	0.511363636364	0.998188405797	0.0018115942029	8.6	9	11.4	0.0206896551724
55790	brood	0.983050847458	0.0169491525424	0.998181818182	0.00181818181818	58.0	1	2.0	0.00364298724954
55790	fem. animal which has given birth	0.983050847458	0.0169491525424	0.998181818182	0.00181818181818	58.0	1	2.0	0.00364298724954
55790	goods	0.983050847458	0.0169491525424	0.998181818182	0.00181818181818	58.0	1	2.0	0.00364298724954
55790	f. animal which has given birth	0.983050847458	0.0169491525424	0.998181818182	0.00181818181818	58.0	1	2.0	0.00364298724954
55790	animal	0.983050847458	0.0169491525424	0.998181818182	0.00181818181818	58.0	1	2.0	0.00364298724954
55790	fortune	0.983050847458	0.0169491525424	0.998181818182	0.00181818181818	58.0	1	2.0	0.00364298724954
55790	coin	0.983050847458	0.0169491525424	0.998181818182	0.00181818181818	58.0	1	2.0	0.00364298724954
55790	tribute	0.983050847458	0.0169491525424	0.998181818182	0.00181818181818	58.0	1	2.0	0.00364298724954
77513	ditch	0.5	0.5	0.998171846435	0.0018281535649	9.0	9	21.0	0.0384615384615
74904	gravel	0.796610169492	0.203389830508	0.998162609095	0.00183739090492	31.3333333333	8	13.6666666667	0.0251572327044
85550	mountain	0.935205183585	0.0647948164147	0.998160073597	0.00183992640294	28.8666666667	2	4.13333333333	0.00761904761905
85550	massive stone	0.935205183585	0.0647948164147	0.998160073597	0.00183992640294	28.8666666667	2	4.13333333333	0.00761904761905
85550	hollow	0.935205183585	0.0647948164147	0.998160073597	0.00183992640294	28.8666666667	2	4.13333333333	0.00761904761905
85550	crag	0.935205183585	0.0647948164147	0.998160073597	0.00183992640294	28.8666666667	2	4.13333333333	0.00761904761905
85550	mountaintop	0.935205183585	0.0647948164147	0.998160073597	0.00183992640294	28.8666666667	2	4.13333333333	0.00761904761905
55790	livestock	0.964957819598	0.0350421804023	0.998147576412	0.00185242358753	55.0740740741	2	3.92592592593	0.00728597449909
55790	property	0.964957819598	0.0350421804023	0.998147576412	0.00185242358753	55.0740740741	2	3.92592592593	0.00728597449909
84584	shrub	0.695431472081	0.304568527919	0.998126171143	0.00187382885696	22.8333333333	10	14.1666666667	0.0265957446809
71245	fat	0.581881533101	0.418118466899	0.998123827392	0.00187617260788	11.1333333333	8	8.86666666667	0.0166666666667
55790	possessions	0.945674044266	0.0543259557344	0.998112020138	0.00188797986155	52.2222222222	3	5.77777777778	0.0109289617486
55790	animal's young	0.945674044266	0.0543259557344	0.998112020138	0.00188797986155	52.2222222222	3	5.77777777778	0.0109289617486
85098	pitch	0.992564412934	0.00743558706554	0.998111171074	0.00188882892607	133.488372093	1	2.51162790698	0.00475301307079
85098	wood (material)	0.992564412934	0.00743558706554	0.998111171074	0.00188882892607	133.488372093	1	2.51162790698	0.00475301307079
85098	log from which tar is produced	0.992564412934	0.00743558706554	0.998111171074	0.00188882892607	133.488372093	1	2.51162790698	0.00475301307079
85098	oak-tree	0.992564412934	0.00743558706554	0.998111171074	0.00188882892607	133.488372093	1	2.51162790698	0.00475301307079
85098	log from which tar is agricultural produced	0.992564412934	0.00743558706554	0.998111171074	0.00188882892607	133.488372093	1	2.51162790698	0.00475301307079
85098	coniferous wood	0.992564412934	0.00743558706554	0.998111171074	0.00188882892607	133.488372093	1	2.51162790698	0.00475301307079
85098	beam	0.992564412934	0.00743558706554	0.998111171074	0.00188882892607	133.488372093	1	2.51162790698	0.00475301307079
85098	tree (especially) oak	0.992564412934	0.00743558706554	0.998111171074	0.00188882892607	133.488372093	1	2.51162790698	0.00475301307079
85098	mast	0.992564412934	0.00743558706554	0.998111171074	0.00188882892607	133.488372093	1	2.51162790698	0.00475301307079
67253	deer flesh	0.954128440367	0.045871559633	0.998109640832	0.00189035916824	20.8	1	2.2	0.00416666666667
67253	flesh of hunted animal	0.954128440367	0.045871559633	0.998109640832	0.00189035916824	20.8	1	2.2	0.00416666666667
67253	quarry	0.954128440367	0.045871559633	0.998109640832	0.00189035916824	20.8	1	2.2	0.00416666666667
67253	to hunt, spoils of the to hunt, game	0.954128440367	0.045871559633	0.998109640832	0.00189035916824	20.8	1	2.2	0.00416666666667
67253	cuckold	0.954128440367	0.045871559633	0.998109640832	0.00189035916824	20.8	1	2.2	0.00416666666667
67253	hunt, game	0.954128440367	0.045871559633	0.998109640832	0.00189035916824	20.8	1	2.2	0.00416666666667
67253	game	0.954128440367	0.045871559633	0.998109640832	0.00189035916824	20.8	1	2.2	0.00416666666667
67253	deer (gen.)	0.954128440367	0.045871559633	0.998109640832	0.00189035916824	20.8	1	2.2	0.00416666666667
67253	fem. deer (gen.)	0.954128440367	0.045871559633	0.998109640832	0.00189035916824	20.8	1	2.2	0.00416666666667
67253	?	0.954128440367	0.045871559633	0.998109640832	0.00189035916824	20.8	1	2.2	0.00416666666667
67253	the art of to hunt	0.954128440367	0.045871559633	0.998109640832	0.00189035916824	20.8	1	2.2	0.00416666666667
77981	spigot	0.955621301775	0.0443786982249	0.998109640832	0.00189035916824	21.5333333333	1	1.46666666667	0.00277777777778
77981	nail	0.955621301775	0.0443786982249	0.998109640832	0.00189035916824	21.5333333333	1	1.46666666667	0.00277777777778
77981	hammer	0.955621301775	0.0443786982249	0.998109640832	0.00189035916824	21.5333333333	1	1.46666666667	0.00277777777778
77981	coulter	0.955621301775	0.0443786982249	0.998109640832	0.00189035916824	21.5333333333	1	1.46666666667	0.00277777777778
75831	cluster of grape	0.968369829684	0.0316301703163	0.998106060606	0.00189393939394	30.6153846154	1	2.38461538462	0.00452488687783
75831	knob	0.968369829684	0.0316301703163	0.998106060606	0.00189393939394	30.6153846154	1	2.38461538462	0.00452488687783
75831	bunch of grape	0.968369829684	0.0316301703163	0.998106060606	0.00189393939394	30.6153846154	1	2.38461538462	0.00452488687783
75831	(hanging) cluster of grape or other fruit or of flowers	0.968369829684	0.0316301703163	0.998106060606	0.00189393939394	30.6153846154	1	2.38461538462	0.00452488687783
75831	handle	0.968369829684	0.0316301703163	0.998106060606	0.00189393939394	30.6153846154	1	2.38461538462	0.00452488687783
75831	shaft	0.968369829684	0.0316301703163	0.998106060606	0.00189393939394	30.6153846154	1	2.38461538462	0.00452488687783
75831	cluster	0.968369829684	0.0316301703163	0.998106060606	0.00189393939394	30.6153846154	1	2.38461538462	0.00452488687783
75831	(hanging) bunch of grapes or other fruit or of flowers	0.968369829684	0.0316301703163	0.998106060606	0.00189393939394	30.6153846154	1	2.38461538462	0.00452488687783
75831	hollow of the hand	0.968369829684	0.0316301703163	0.998106060606	0.00189393939394	30.6153846154	1	2.38461538462	0.00452488687783
75831	metal support	0.968369829684	0.0316301703163	0.998106060606	0.00189393939394	30.6153846154	1	2.38461538462	0.00452488687783
75831	barb	0.968369829684	0.0316301703163	0.998106060606	0.00189393939394	30.6153846154	1	2.38461538462	0.00452488687783
75831	s. pastry meat etc cooked by dipping in fat	0.968369829684	0.0316301703163	0.998106060606	0.00189393939394	30.6153846154	1	2.38461538462	0.00452488687783
75831	clamp	0.968369829684	0.0316301703163	0.998106060606	0.00189393939394	30.6153846154	1	2.38461538462	0.00452488687783
75831	bunch	0.968369829684	0.0316301703163	0.998106060606	0.00189393939394	30.6153846154	1	2.38461538462	0.00452488687783
75831	bracket	0.968369829684	0.0316301703163	0.998106060606	0.00189393939394	30.6153846154	1	2.38461538462	0.00452488687783
85098	pole	0.984851153778	0.0151488462216	0.998093552121	0.00190644787908	130.023255814	2	4.97674418605	0.00950602614157
85098	spike	0.984851153778	0.0151488462216	0.998093552121	0.00190644787908	130.023255814	2	4.97674418605	0.00950602614157
85098	kindling	0.984851153778	0.0151488462216	0.998093552121	0.00190644787908	130.023255814	2	4.97674418605	0.00950602614157
85098	vine	0.985131396957	0.0148686030429	0.998093552121	0.00190644787908	132.511627907	2	2.48837209302	0.00475301307079
85098	plow	0.985131396957	0.0148686030429	0.998093552121	0.00190644787908	132.511627907	2	2.48837209302	0.00475301307079
85098	tree-trunk	0.985131396957	0.0148686030429	0.998093552121	0.00190644787908	132.511627907	2	2.48837209302	0.00475301307079
85098	tree (trunk)	0.985131396957	0.0148686030429	0.998093552121	0.00190644787908	132.511627907	2	2.48837209302	0.00475301307079
85098	resin	0.985131396957	0.0148686030429	0.998093552121	0.00190644787908	132.511627907	2	2.48837209302	0.00475301307079
65005	earthworm	0.989782551742	0.0102174482578	0.998075998076	0.001924001924	96.8717948718	1	2.12820512821	0.00410256410256
65005	insects	0.989782551742	0.0102174482578	0.998075998076	0.001924001924	96.8717948718	1	2.12820512821	0.00410256410256
65005	spider	0.989782551742	0.0102174482578	0.998075998076	0.001924001924	96.8717948718	1	2.12820512821	0.00410256410256
65005	bookworm	0.989782551742	0.0102174482578	0.998075998076	0.001924001924	96.8717948718	1	2.12820512821	0.00410256410256
65005	ant	0.989782551742	0.0102174482578	0.998075998076	0.001924001924	96.8717948718	1	2.12820512821	0.00410256410256
65005	wood-worm	0.989782551742	0.0102174482578	0.998075998076	0.001924001924	96.8717948718	1	2.12820512821	0.00410256410256
65005	larva of certain insects	0.989782551742	0.0102174482578	0.998075998076	0.001924001924	96.8717948718	1	2.12820512821	0.00410256410256
65005	woad	0.989782551742	0.0102174482578	0.998075998076	0.001924001924	96.8717948718	1	2.12820512821	0.00410256410256
65005	to twist	0.989782551742	0.0102174482578	0.998075998076	0.001924001924	96.8717948718	1	2.12820512821	0.00410256410256
65005	purple	0.989782551742	0.0102174482578	0.998075998076	0.001924001924	96.8717948718	1	2.12820512821	0.00410256410256
65005	scorpion	0.989782551742	0.0102174482578	0.998075998076	0.001924001924	96.8717948718	1	2.12820512821	0.00410256410256
65005	earwig	0.989782551742	0.0102174482578	0.998075998076	0.001924001924	96.8717948718	1	2.12820512821	0.00410256410256
65005	viper	0.989782551742	0.0102174482578	0.998075998076	0.001924001924	96.8717948718	1	2.12820512821	0.00410256410256
65005	fem. snake	0.989782551742	0.0102174482578	0.998075998076	0.001924001924	96.8717948718	1	2.12820512821	0.00410256410256
65005	red	0.989782551742	0.0102174482578	0.998075998076	0.001924001924	96.8717948718	1	2.12820512821	0.00410256410256
65005	any crawling animal	0.989782551742	0.0102174482578	0.998075998076	0.001924001924	96.8717948718	1	2.12820512821	0.00410256410256
65005	flea	0.989782551742	0.0102174482578	0.998075998076	0.001924001924	96.8717948718	1	2.12820512821	0.00410256410256
65005	worm (gen.)	0.989782551742	0.0102174482578	0.998075998076	0.001924001924	96.8717948718	1	2.12820512821	0.00410256410256
65005	fly	0.989782551742	0.0102174482578	0.998075998076	0.001924001924	96.8717948718	1	2.12820512821	0.00410256410256
65005	snake (esp. viper)	0.989782551742	0.0102174482578	0.998075998076	0.001924001924	96.8717948718	1	2.12820512821	0.00410256410256
65005	purple snail	0.989782551742	0.0102174482578	0.998075998076	0.001924001924	96.8717948718	1	2.12820512821	0.00410256410256
85098	oak	0.976852682577	0.0231473174233	0.998075601375	0.00192439862543	126.604651163	3	7.39534883721	0.0142590392124
85098	piece of wood	0.976852682577	0.0231473174233	0.998075601375	0.00192439862543	126.604651163	3	7.39534883721	0.0142590392124
55790	money	0.925155925156	0.0748440748441	0.998075072185	0.00192492781521	49.4444444444	4	7.55555555556	0.0145719489982
71546	cloth	0.855718475073	0.144281524927	0.99806856591	0.00193143408981	71.1707317073	12	22.8292682927	0.0441785549931
85098	tar	0.969153515065	0.0308464849354	0.998057309373	0.00194269062652	125.674418605	4	7.32558139535	0.0142590392124
85098	club	0.969153515065	0.0308464849354	0.998057309373	0.00194269062652	125.674418605	4	7.32558139535	0.0142590392124
85098	stick	0.969723640204	0.0302763597958	0.998057309373	0.00194269062652	128.11627907	4	4.88372093023	0.00950602614157
65005	vermin	0.979122055675	0.0208779443255	0.998052580331	0.00194741966894	93.7948717949	2	4.20512820513	0.00820512820513
65005	silkworm	0.979122055675	0.0208779443255	0.998052580331	0.00194741966894	93.7948717949	2	4.20512820513	0.00820512820513
65005	mosquito	0.979122055675	0.0208779443255	0.998052580331	0.00194741966894	93.7948717949	2	4.20512820513	0.00820512820513
65005	woodworm	0.979122055675	0.0208779443255	0.998052580331	0.00194741966894	93.7948717949	2	4.20512820513	0.00820512820513
65005	lizard	0.979122055675	0.0208779443255	0.998052580331	0.00194741966894	93.7948717949	2	4.20512820513	0.00820512820513
75831	claw	0.931937172775	0.0680628272251	0.998043052838	0.00195694716243	27.3846153846	2	4.61538461538	0.00904977375566
75831	to seize	0.931937172775	0.0680628272251	0.998043052838	0.00195694716243	27.3846153846	2	4.61538461538	0.00904977375566
85550	rock	0.853300733496	0.146699266504	0.998033431662	0.00196656833825	23.2666666667	4	7.73333333333	0.0152380952381
65005	reptile	0.968006562756	0.0319934372436	0.99802858551	0.0019714144899	90.7692307692	3	6.23076923077	0.0123076923077
65005	larva	0.968006562756	0.0319934372436	0.99802858551	0.0019714144899	90.7692307692	3	6.23076923077	0.0123076923077
67253	game (meat)	0.89898989899	0.10101010101	0.99801980198	0.0019801980198	17.8	2	4.2	0.00833333333333
65005	maggot	0.956424581006	0.0435754189944	0.998003992016	0.00199600798403	87.7948717949	4	8.20512820513	0.0164102564103
84930	middle	0.700534759358	0.299465240642	0.998001998002	0.001998001998	18.7142857143	8	10.2857142857	0.020592020592
75831	staple	0.89014084507	0.10985915493	0.997975708502	0.00202429149798	24.3076923077	3	6.69230769231	0.0135746606335
72109	to twist	0.334677419355	0.665322580645	0.997975708502	0.00202429149798	5.53333333333	11	12.4666666667	0.0252873563218
85550	valley	0.805194805195	0.194805194805	0.997963340122	0.0020366598778	20.6666666667	5	9.33333333333	0.0190476190476
85550	cliff	0.805194805195	0.194805194805	0.997963340122	0.0020366598778	20.6666666667	5	9.33333333333	0.0190476190476
55790	wealth	0.855835240275	0.144164759725	0.997955010225	0.00204498977505	41.5555555556	7	12.4444444444	0.0255009107468
65005	insect	0.931818181818	0.0681818181818	0.997952917093	0.00204708290686	82.0	6	12.0	0.0246153846154
59610	y. (infertile?) sow	0.953488372093	0.046511627907	0.997933884298	0.00206611570248	20.5	1	1.5	0.00310559006211
59610	gilt	0.953488372093	0.046511627907	0.997933884298	0.00206611570248	20.5	1	1.5	0.00310559006211
59610	boar	0.953488372093	0.046511627907	0.997933884298	0.00206611570248	20.5	1	1.5	0.00310559006211
59610	(castrated) m. pig	0.953488372093	0.046511627907	0.997933884298	0.00206611570248	20.5	1	1.5	0.00310559006211
67253	venison	0.833333333333	0.166666666667	0.997920997921	0.002079002079	15.0	3	6.0	0.0125
85945	boulder	0.974025974026	0.025974025974	0.997920997921	0.002079002079	37.5	1	1.5	0.003125
85945	basis	0.974025974026	0.025974025974	0.997920997921	0.002079002079	37.5	1	1.5	0.003125
85945	rocky escarpment	0.974025974026	0.025974025974	0.997920997921	0.002079002079	37.5	1	1.5	0.003125
85945	stretch of hills or moorland	0.974025974026	0.025974025974	0.997920997921	0.002079002079	37.5	1	1.5	0.003125
85945	treeless mountain	0.974025974026	0.025974025974	0.997920997921	0.002079002079	37.5	1	1.5	0.003125
85945	grave-stone	0.974025974026	0.025974025974	0.997920997921	0.002079002079	37.5	1	1.5	0.003125
85945	precipice	0.974025974026	0.025974025974	0.997920997921	0.002079002079	37.5	1	1.5	0.003125
85945	towering rock	0.974025974026	0.025974025974	0.997920997921	0.002079002079	37.5	1	1.5	0.003125
85945	hill	0.974025974026	0.025974025974	0.997920997921	0.002079002079	37.5	1	1.5	0.003125
65005	dragon	0.905224787363	0.0947752126367	0.997899159664	0.00210084033613	76.4102564103	8	15.5897435897	0.0328205128205
85098	tree (not log)	0.890839856146	0.109160143854	0.997897424345	0.00210257565518	97.9302325581	12	27.0697674419	0.0570361568494
70811	fertile	0.977246871445	0.0227531285552	0.997883597884	0.0021164021164	42.95	1	2.05	0.00434782608696
70811	vegetal fat	0.977246871445	0.0227531285552	0.997883597884	0.0021164021164	42.95	1	2.05	0.00434782608696
70811	rich	0.977246871445	0.0227531285552	0.997883597884	0.0021164021164	42.95	1	2.05	0.00434782608696
70811	animal fat	0.977246871445	0.0227531285552	0.997883597884	0.0021164021164	42.95	1	2.05	0.00434782608696
70811	tallow	0.977246871445	0.0227531285552	0.997883597884	0.0021164021164	42.95	1	2.05	0.00434782608696
70811	pork fat	0.977246871445	0.0227531285552	0.997883597884	0.0021164021164	42.95	1	2.05	0.00434782608696
85945	high mountain, above the treeline	0.94606741573	0.0539325842697	0.997861724875	0.00213827512473	35.0833333333	2	2.91666666667	0.00625
70251	minced meat, esp. pork	0.967468175389	0.032531824611	0.997849462366	0.00215053763441	29.7391304348	1	1.26086956522	0.00271739130435
70251	full	0.967468175389	0.032531824611	0.997849462366	0.00215053763441	29.7391304348	1	1.26086956522	0.00271739130435
70251	minced meat, esp. minced pork	0.967468175389	0.032531824611	0.997849462366	0.00215053763441	29.7391304348	1	1.26086956522	0.00271739130435
70811	fatness	0.952380952381	0.047619047619	0.997830802603	0.00216919739696	40.0	2	4.0	0.00869565217391
59610	y. sow	0.900709219858	0.0992907801418	0.997830802603	0.00216919739696	18.1428571429	2	2.85714285714	0.00621118012422
59610	m. pig	0.900709219858	0.0992907801418	0.997830802603	0.00216919739696	18.1428571429	2	2.85714285714	0.00621118012422
57026	beast of burden	0.409090909091	0.590909090909	0.997826086957	0.00217391304348	6.23076923077	9	11.7692307692	0.025641025641
77981	spade	0.788732394366	0.211267605634	0.997811816193	0.00218818380744	14.9333333333	4	5.06666666667	0.0111111111111
55486	y. fattened pig	0.973214285714	0.0267857142857	0.997807017544	0.00219298245614	36.3333333333	1	1.66666666667	0.003663003663
55486	livestock	0.973214285714	0.0267857142857	0.997807017544	0.00219298245614	36.3333333333	1	1.66666666667	0.003663003663
55486	herd	0.973214285714	0.0267857142857	0.997807017544	0.00219298245614	36.3333333333	1	1.66666666667	0.003663003663
55486	dial. pig	0.973214285714	0.0267857142857	0.997807017544	0.00219298245614	36.3333333333	1	1.66666666667	0.003663003663
55486	s. livestock	0.973214285714	0.0267857142857	0.997807017544	0.00219298245614	36.3333333333	1	1.66666666667	0.003663003663
55486	s. live stock	0.973214285714	0.0267857142857	0.997807017544	0.00219298245614	36.3333333333	1	1.66666666667	0.003663003663
70811	greasy	0.925280199253	0.0747198007472	0.997775305895	0.00222469410456	37.15	3	5.85	0.0130434782609
70251	flesh	0.932352941176	0.0676470588235	0.997772828508	0.0022271714922	27.5652173913	2	2.4347826087	0.0054347826087
70251	pork	0.932352941176	0.0676470588235	0.997772828508	0.0022271714922	27.5652173913	2	2.4347826087	0.0054347826087
70251	mealtime	0.932352941176	0.0676470588235	0.997772828508	0.0022271714922	27.5652173913	2	2.4347826087	0.0054347826087
55790	tax	0.744625967326	0.255374032674	0.997769516729	0.00223048327138	32.0740740741	11	17.9259259259	0.040072859745
55486	animal	0.946496815287	0.0535031847134	0.997742663657	0.00225733634312	35.380952381	2	1.61904761905	0.003663003663
73082	(grain of) wheat	0.951127819549	0.0488721804511	0.997732426304	0.00226757369615	19.4615384615	1	1.53846153846	0.0034965034965
73082	grain measure	0.951127819549	0.0488721804511	0.997732426304	0.00226757369615	19.4615384615	1	1.53846153846	0.0034965034965
73082	brome grass	0.951127819549	0.0488721804511	0.997732426304	0.00226757369615	19.4615384615	1	1.53846153846	0.0034965034965
73082	corn measure	0.951127819549	0.0488721804511	0.997732426304	0.00226757369615	19.4615384615	1	1.53846153846	0.0034965034965
73082	millet	0.951127819549	0.0488721804511	0.997732426304	0.00226757369615	19.4615384615	1	1.53846153846	0.0034965034965
73082	gorse	0.951127819549	0.0488721804511	0.997732426304	0.00226757369615	19.4615384615	1	1.53846153846	0.0034965034965
73082	winter wheat	0.951127819549	0.0488721804511	0.997732426304	0.00226757369615	19.4615384615	1	1.53846153846	0.0034965034965
60380	(coll.) any farm bird	0.952488687783	0.0475113122172	0.997732426304	0.00226757369615	20.0476190476	1	0.952380952381	0.0021645021645
84584	bush	0.435294117647	0.564705882353	0.997725549659	0.00227445034117	12.3333333333	16	18.6666666667	0.0425531914894
71546	adze	0.643736422882	0.356263577118	0.997718197376	0.00228180262407	43.3658536585	24	38.6341463415	0.0883571099862
77981	wedge	0.722222222222	0.277777777778	0.997690531178	0.00230946882217	13.0	5	6.0	0.0138888888889
55146	roebuck	0.978878960195	0.021121039805	0.997632575758	0.00236742424242	46.3461538462	1	1.65384615385	0.00392464678179
55146	to subdue	0.978878960195	0.021121039805	0.997632575758	0.00236742424242	46.3461538462	1	1.65384615385	0.00392464678179
55146	house	0.978878960195	0.021121039805	0.997632575758	0.00236742424242	46.3461538462	1	1.65384615385	0.00392464678179
55146	y. bull to be tamed	0.978878960195	0.021121039805	0.997632575758	0.00236742424242	46.3461538462	1	1.65384615385	0.00392464678179
55146	elk	0.978878960195	0.021121039805	0.997632575758	0.00236742424242	46.3461538462	1	1.65384615385	0.00392464678179
55146	f. fallow deer	0.978878960195	0.021121039805	0.997632575758	0.00236742424242	46.3461538462	1	1.65384615385	0.00392464678179
55146	to tame	0.978878960195	0.021121039805	0.997632575758	0.00236742424242	46.3461538462	1	1.65384615385	0.00392464678179
55146	w. ox	0.978878960195	0.021121039805	0.997632575758	0.00236742424242	46.3461538462	1	1.65384615385	0.00392464678179
55146	calf	0.978878960195	0.021121039805	0.997632575758	0.00236742424242	46.3461538462	1	1.65384615385	0.00392464678179
55146	champion	0.978878960195	0.021121039805	0.997632575758	0.00236742424242	46.3461538462	1	1.65384615385	0.00392464678179
55146	bull	0.978878960195	0.021121039805	0.997632575758	0.00236742424242	46.3461538462	1	1.65384615385	0.00392464678179
55146	y. ox	0.978878960195	0.021121039805	0.997632575758	0.00236742424242	46.3461538462	1	1.65384615385	0.00392464678179
55146	y. cow	0.978878960195	0.021121039805	0.997632575758	0.00236742424242	46.3461538462	1	1.65384615385	0.00392464678179
55146	y. bull	0.978878960195	0.021121039805	0.997632575758	0.00236742424242	46.3461538462	1	1.65384615385	0.00392464678179
55146	doe	0.978878960195	0.021121039805	0.997632575758	0.00236742424242	46.3461538462	1	1.65384615385	0.00392464678179
75249	root	0.15	0.85	0.997624703088	0.00237529691211	2.64705882353	15	12.3529411765	0.0294117647059
73082	spear-grass	0.895161290323	0.104838709677	0.997613365155	0.00238663484487	17.0769230769	2	2.92307692308	0.00699300699301
73082	winter corn	0.895161290323	0.104838709677	0.997613365155	0.00238663484487	17.0769230769	2	2.92307692308	0.00699300699301
70251	sausage	0.854430379747	0.145569620253	0.997601918465	0.00239808153477	23.4782608696	4	4.52173913043	0.0108695652174
70811	fat (organic substance)	0.829545454545	0.170454545455	0.997590361446	0.00240963855422	29.2	6	10.8	0.0260869565217
55696	buffalo-heifer	0.991322640021	0.00867735997896	0.997584541063	0.0024154589372	114.242424242	1	2.75757575758	0.00667693888033
55696	fee	0.991322640021	0.00867735997896	0.997584541063	0.0024154589372	114.242424242	1	2.75757575758	0.00667693888033
55696	wealth	0.991322640021	0.00867735997896	0.997584541063	0.0024154589372	114.242424242	1	2.75757575758	0.00667693888033
55696	movable possessionss	0.991322640021	0.00867735997896	0.997584541063	0.0024154589372	114.242424242	1	2.75757575758	0.00667693888033
55696	to shear	0.991322640021	0.00867735997896	0.997584541063	0.0024154589372	114.242424242	1	2.75757575758	0.00667693888033
55696	possessionss	0.991322640021	0.00867735997896	0.997584541063	0.0024154589372	114.242424242	1	2.75757575758	0.00667693888033
55696	sheep or goat	0.991322640021	0.00867735997896	0.997584541063	0.0024154589372	114.242424242	1	2.75757575758	0.00667693888033
55696	possessions	0.991322640021	0.00867735997896	0.997584541063	0.0024154589372	114.242424242	1	2.75757575758	0.00667693888033
55696	to card	0.991322640021	0.00867735997896	0.997584541063	0.0024154589372	114.242424242	1	2.75757575758	0.00667693888033
55696	stupid	0.991322640021	0.00867735997896	0.997584541063	0.0024154589372	114.242424242	1	2.75757575758	0.00667693888033
55696	to comb	0.991322640021	0.00867735997896	0.997584541063	0.0024154589372	114.242424242	1	2.75757575758	0.00667693888033
55146	sheep	0.956302521008	0.0436974789916	0.997576345128	0.00242365487155	43.7692307692	2	3.23076923077	0.00784929356358
55146	buck	0.956302521008	0.0436974789916	0.997576345128	0.00242365487155	43.7692307692	2	3.23076923077	0.00784929356358
55696	(domesticated) animal	0.982229402262	0.0177705977383	0.997557768176	0.00244223182416	110.545454545	2	5.45454545455	0.0133538777607
55696	movable possessions	0.982229402262	0.0177705977383	0.997557768176	0.00244223182416	110.545454545	2	5.45454545455	0.0133538777607
55696	domestic or sacrificial animal	0.982229402262	0.0177705977383	0.997557768176	0.00244223182416	110.545454545	2	5.45454545455	0.0133538777607
55696	(small) cattle	0.982229402262	0.0177705977383	0.997557768176	0.00244223182416	110.545454545	2	5.45454545455	0.0133538777607
55696	goat	0.982649842271	0.0173501577287	0.997557768176	0.00244223182416	113.272727273	2	2.72727272727	0.00667693888033
55790	riches	0.613180515759	0.386819484241	0.997547015536	0.00245298446443	23.7777777778	15	22.2222222222	0.0546448087432
55696	fleece	0.97270471464	0.0272952853598	0.997530395137	0.00246960486322	106.909090909	3	8.09090909091	0.020030816641
55146	sheep (gen.)	0.932232841008	0.0677671589922	0.997517378352	0.00248262164846	41.2692307692	3	4.73076923077	0.0117739403454
55146	ewe	0.932232841008	0.0677671589922	0.997517378352	0.00248262164846	41.2692307692	3	4.73076923077	0.0117739403454
55146	stag	0.932232841008	0.0677671589922	0.997517378352	0.00248262164846	41.2692307692	3	4.73076923077	0.0117739403454
85945	mountain	0.776	0.224	0.997506234414	0.00249376558603	24.25	7	8.75	0.021875
55696	flock	0.96449704142	0.0355029585799	0.997502401537	0.00249759846302	108.666666667	4	5.33333333333	0.0133538777607
55696	herd	0.96449704142	0.0355029585799	0.997502401537	0.00249759846302	108.666666667	4	5.33333333333	0.0133538777607
55696	domestic animal	0.962732919255	0.0372670807453	0.997502401537	0.00249759846302	103.333333333	4	10.6666666667	0.0267077555213
55696	animal	0.962732919255	0.0372670807453	0.997502401537	0.00249759846302	103.333333333	4	10.6666666667	0.0267077555213
55696	s. cattle	0.962732919255	0.0372670807453	0.997502401537	0.00249759846302	103.333333333	4	10.6666666667	0.0267077555213
70980	fat	0.949324324324	0.0506756756757	0.9975	0.0025	18.7333333333	1	1.26666666667	0.0031746031746
70980	paunch fat	0.949324324324	0.0506756756757	0.9975	0.0025	18.7333333333	1	1.26666666667	0.0031746031746
70980	lard	0.949324324324	0.0506756756757	0.9975	0.0025	18.7333333333	1	1.26666666667	0.0031746031746
70980	kidneys	0.949324324324	0.0506756756757	0.9975	0.0025	18.7333333333	1	1.26666666667	0.0031746031746
59610	castrated m. pig	0.704641350211	0.295358649789	0.997448979592	0.00255102040816	11.9285714286	5	6.07142857143	0.0155279503106
58558	m. goat	0.243140964995	0.756859035005	0.997448979592	0.00255102040816	8.03125	25	17.96875	0.0459558823529
55696	beast	0.941385435169	0.0586145648313	0.997444466287	0.00255553371339	96.3636363636	6	15.6363636364	0.040061633282
55696	property	0.941385435169	0.0586145648313	0.997444466287	0.00255553371339	96.3636363636	6	15.6363636364	0.040061633282
55486	ram	0.802816901408	0.197183098592	0.997442455243	0.00255754475703	24.4285714286	6	8.57142857143	0.021978021978
71299	sebaceous wax	0.970183486239	0.0298165137615	0.997402597403	0.0025974025974	32.5384615385	1	2.46153846154	0.00641025641026
71299	melted fat	0.970183486239	0.0298165137615	0.997402597403	0.0025974025974	32.5384615385	1	2.46153846154	0.00641025641026
71299	hard fat	0.970183486239	0.0298165137615	0.997402597403	0.0025974025974	32.5384615385	1	2.46153846154	0.00641025641026
79157	fell	0.970183486239	0.0298165137615	0.997402597403	0.0025974025974	32.5384615385	1	2.46153846154	0.00641025641026
79157	hatchet	0.970183486239	0.0298165137615	0.997402597403	0.0025974025974	32.5384615385	1	2.46153846154	0.00641025641026
79157	to dig	0.970183486239	0.0298165137615	0.997402597403	0.0025974025974	32.5384615385	1	2.46153846154	0.00641025641026
79157	bent sabre	0.970183486239	0.0298165137615	0.997402597403	0.0025974025974	32.5384615385	1	2.46153846154	0.00641025641026
79157	battle-axe	0.970183486239	0.0298165137615	0.997402597403	0.0025974025974	32.5384615385	1	2.46153846154	0.00641025641026
79157	butchering knife	0.970183486239	0.0298165137615	0.997402597403	0.0025974025974	32.5384615385	1	2.46153846154	0.00641025641026
79157	knife	0.970183486239	0.0298165137615	0.997402597403	0.0025974025974	32.5384615385	1	2.46153846154	0.00641025641026
67253	to hunt	0.453125	0.546875	0.997402597403	0.0025974025974	5.8	7	11.2	0.0291666666667
70980	paunch	0.89247311828	0.10752688172	0.997361477573	0.00263852242744	16.6	2	2.4	0.00634920634921
70980	potbelly	0.89247311828	0.10752688172	0.997361477573	0.00263852242744	16.6	2	2.4	0.00634920634921
55486	pig	0.772093023256	0.227906976744	0.997354497354	0.0026455026455	23.7142857143	7	8.28571428571	0.021978021978
82836	grip	0.961165048544	0.0388349514563	0.997354497354	0.0026455026455	24.75	1	3.25	0.00862068965517
82836	vintage	0.961165048544	0.0388349514563	0.997354497354	0.0026455026455	24.75	1	3.25	0.00862068965517
82836	drink	0.961165048544	0.0388349514563	0.997354497354	0.0026455026455	24.75	1	3.25	0.00862068965517
82836	blaze of the sun	0.961165048544	0.0388349514563	0.997354497354	0.0026455026455	24.75	1	3.25	0.00862068965517
82836	crop	0.961165048544	0.0388349514563	0.997354497354	0.0026455026455	24.75	1	3.25	0.00862068965517
82836	summer heat	0.961165048544	0.0388349514563	0.997354497354	0.0026455026455	24.75	1	3.25	0.00862068965517
82836	draught	0.961165048544	0.0388349514563	0.997354497354	0.0026455026455	24.75	1	3.25	0.00862068965517
82836	hot	0.961165048544	0.0388349514563	0.997354497354	0.0026455026455	24.75	1	3.25	0.00862068965517
82836	flame	0.961165048544	0.0388349514563	0.997354497354	0.0026455026455	24.75	1	3.25	0.00862068965517
82836	warm and bright weather	0.961165048544	0.0388349514563	0.997354497354	0.0026455026455	24.75	1	3.25	0.00862068965517
82836	grasp	0.961165048544	0.0388349514563	0.997354497354	0.0026455026455	24.75	1	3.25	0.00862068965517
82836	warm (of weather)	0.961165048544	0.0388349514563	0.997354497354	0.0026455026455	24.75	1	3.25	0.00862068965517
82836	warmth	0.961165048544	0.0388349514563	0.997354497354	0.0026455026455	24.75	1	3.25	0.00862068965517
55696	money	0.910353154241	0.0896468457591	0.997352342159	0.00264765784114	91.3939393939	9	17.6060606061	0.0467385721623
75831	hook	0.414414414414	0.585585585586	0.997333333333	0.00266666666667	7.07692307692	10	16.9230769231	0.0452488687783
85945	cliff	0.694915254237	0.305084745763	0.99732858415	0.0026714158504	20.5	9	10.5	0.028125
71299	vegetal fat	0.935960591133	0.064039408867	0.997319034853	0.00268096514745	29.2307692308	2	4.76923076923	0.0128205128205
71299	fat	0.935960591133	0.064039408867	0.997319034853	0.00268096514745	29.2307692308	2	4.76923076923	0.0128205128205
79157	hammer	0.935960591133	0.064039408867	0.997319034853	0.00268096514745	29.2307692308	2	4.76923076923	0.0128205128205
79157	chop	0.935960591133	0.064039408867	0.997319034853	0.00268096514745	29.2307692308	2	4.76923076923	0.0128205128205
79157	smite	0.940503432494	0.0594965675057	0.997319034853	0.00268096514745	31.6153846154	2	2.38461538462	0.00641025641026
79157	beat	0.940503432494	0.0594965675057	0.997319034853	0.00268096514745	31.6153846154	2	2.38461538462	0.00641025641026
79157	disable	0.940503432494	0.0594965675057	0.997319034853	0.00268096514745	31.6153846154	2	2.38461538462	0.00641025641026
79157	to hit	0.940503432494	0.0594965675057	0.997319034853	0.00268096514745	31.6153846154	2	2.38461538462	0.00641025641026
79157	tire out	0.940503432494	0.0594965675057	0.997319034853	0.00268096514745	31.6153846154	2	2.38461538462	0.00641025641026
82836	harvest	0.912087912088	0.0879120879121	0.997248968363	0.00275103163686	20.75	2	6.25	0.0172413793103
82836	glow	0.912087912088	0.0879120879121	0.997248968363	0.00275103163686	20.75	2	6.25	0.0172413793103
71299	suet	0.896825396825	0.103174603175	0.997229916898	0.00277008310249	26.0769230769	3	6.92307692308	0.0192307692308
85945	rock	0.652173913043	0.347826086957	0.997229916898	0.00277008310249	18.75	10	11.25	0.03125
55696	livestock	0.850366236484	0.149633763516	0.997218656397	0.00278134360291	73.8787878788	13	31.1212121212	0.0868002054443
70980	intestinal fat	0.829545454545	0.170454545455	0.997206703911	0.00279329608939	14.6	3	3.4	0.00952380952381
65005	worm	0.554002541296	0.445997458704	0.997200839748	0.00279916025192	33.5384615385	27	39.4615384615	0.110769230769
73082	spelt	0.684466019417	0.315533980583	0.99716713881	0.0028328611898	10.8461538462	5	6.15384615385	0.0174825174825
73082	couch grass	0.707207207207	0.292792792793	0.99716713881	0.0028328611898	12.0769230769	5	4.92307692308	0.013986013986
93629	needle	0.96261682243	0.0373831775701	0.997150997151	0.002849002849	25.75	1	1.25	0.00357142857143
93629	hangs on me	0.96261682243	0.0373831775701	0.997150997151	0.002849002849	25.75	1	1.25	0.00357142857143
93629	tied	0.96261682243	0.0373831775701	0.997150997151	0.002849002849	25.75	1	1.25	0.00357142857143
93629	cloth	0.96261682243	0.0373831775701	0.997150997151	0.002849002849	25.75	1	1.25	0.00357142857143
93629	seam	0.96261682243	0.0373831775701	0.997150997151	0.002849002849	25.75	1	1.25	0.00357142857143
82836	fire	0.85	0.15	0.997134670487	0.00286532951289	17.0	3	9.0	0.0258620689655
82836	warm	0.85	0.15	0.997134670487	0.00286532951289	17.0	3	9.0	0.0258620689655
85098	tree	0.480965645311	0.519034354689	0.997088791849	0.00291120815138	36.1395348837	39	61.8604651163	0.18061449669
71144	wax polish	0.968446601942	0.0315533980583	0.99706744868	0.00293255131965	30.6923076923	1	2.30769230769	0.00678733031674
71144	richness	0.968446601942	0.0315533980583	0.99706744868	0.00293255131965	30.6923076923	1	2.30769230769	0.00678733031674
71144	profit	0.968446601942	0.0315533980583	0.99706744868	0.00293255131965	30.6923076923	1	2.30769230769	0.00678733031674
71144	animal or human fat	0.968446601942	0.0315533980583	0.99706744868	0.00293255131965	30.6923076923	1	2.30769230769	0.00678733031674
71144	melted fat	0.968446601942	0.0315533980583	0.99706744868	0.00293255131965	30.6923076923	1	2.30769230769	0.00678733031674
70980	suet	0.760956175299	0.239043824701	0.99703264095	0.00296735905045	12.7333333333	4	4.26666666667	0.0126984126984
93629	to hang	0.921875	0.078125	0.99703264095	0.00296735905045	23.6	2	2.4	0.00714285714286
79157	s. axe	0.801829268293	0.198170731707	0.99703264095	0.00296735905045	20.2307692308	5	10.7692307692	0.0320512820513
82836	heat	0.771428571429	0.228571428571	0.997010463378	0.00298953662182	13.5	4	11.5	0.0344827586207
71719	having a silver helmet	0.97350343474	0.0264965652601	0.996992481203	0.00300751879699	36.7407407407	1	1.25925925926	0.00379867046534
71719	(plots) being hatched	0.97350343474	0.0264965652601	0.996992481203	0.00300751879699	36.7407407407	1	1.25925925926	0.00379867046534
71719	plait	0.97350343474	0.0264965652601	0.996992481203	0.00300751879699	36.7407407407	1	1.25925925926	0.00379867046534
71719	to twine	0.97350343474	0.0264965652601	0.996992481203	0.00300751879699	36.7407407407	1	1.25925925926	0.00379867046534
71719	to wind	0.97350343474	0.0264965652601	0.996992481203	0.00300751879699	36.7407407407	1	1.25925925926	0.00379867046534
71719	plaited basket	0.97350343474	0.0264965652601	0.996992481203	0.00300751879699	36.7407407407	1	1.25925925926	0.00379867046534
71719	turban	0.97350343474	0.0264965652601	0.996992481203	0.00300751879699	36.7407407407	1	1.25925925926	0.00379867046534
71719	to lie	0.97350343474	0.0264965652601	0.996992481203	0.00300751879699	36.7407407407	1	1.25925925926	0.00379867046534
71719	knit	0.97350343474	0.0264965652601	0.996992481203	0.00300751879699	36.7407407407	1	1.25925925926	0.00379867046534
55866	consisting of live animals (of property or wealth)	0.943775100402	0.0562248995984	0.996913580247	0.00308641975309	16.7857142857	1	1.21428571429	0.00375939849624
55866	y. animal	0.943775100402	0.0562248995984	0.996913580247	0.00308641975309	16.7857142857	1	1.21428571429	0.00375939849624
55866	(obsolete) alive	0.943775100402	0.0562248995984	0.996913580247	0.00308641975309	16.7857142857	1	1.21428571429	0.00375939849624
55866	taking only a short time	0.943775100402	0.0562248995984	0.996913580247	0.00308641975309	16.7857142857	1	1.21428571429	0.00375939849624
55866	owned as livestock (of animals)	0.943775100402	0.0562248995984	0.996913580247	0.00308641975309	16.7857142857	1	1.21428571429	0.00375939849624
55866	fast	0.943775100402	0.0562248995984	0.996913580247	0.00308641975309	16.7857142857	1	1.21428571429	0.00375939849624
71719	to braid	0.945288753799	0.0547112462006	0.996901626646	0.00309837335399	34.5555555556	2	2.44444444444	0.00759734093067
71719	to knit	0.945288753799	0.0547112462006	0.996901626646	0.00309837335399	34.5555555556	2	2.44444444444	0.00759734093067
71144	animal fat	0.891061452514	0.108938547486	0.996858638743	0.00314136125654	24.5384615385	3	6.46153846154	0.0203619909502
70980	entrails	0.6875	0.3125	0.996835443038	0.00316455696203	11.0	5	5.0	0.015873015873
77981	plowshare	0.347826086957	0.652173913043	0.996805111821	0.00319488817891	5.33333333333	10	8.66666666667	0.0277777777778
79157	to hew	0.708333333333	0.291666666667	0.996805111821	0.00319488817891	17.0	7	12.0	0.0384615384615
64563	roebuck	0.990132698197	0.00986730180333	0.996763754045	0.00323624595469	100.344827586	1	2.65517241379	0.00862068965517
64563	bill	0.990132698197	0.00986730180333	0.996763754045	0.00323624595469	100.344827586	1	2.65517241379	0.00862068965517
64563	middle	0.990132698197	0.00986730180333	0.996763754045	0.00323624595469	100.344827586	1	2.65517241379	0.00862068965517
64563	beak-hook	0.990132698197	0.00986730180333	0.996763754045	0.00323624595469	100.344827586	1	2.65517241379	0.00862068965517
64563	w. animal	0.990132698197	0.00986730180333	0.996763754045	0.00323624595469	100.344827586	1	2.65517241379	0.00862068965517
64563	red deer	0.990132698197	0.00986730180333	0.996763754045	0.00323624595469	100.344827586	1	2.65517241379	0.00862068965517
64563	game	0.990132698197	0.00986730180333	0.996763754045	0.00323624595469	100.344827586	1	2.65517241379	0.00862068965517
64563	long-handle sickle	0.990132698197	0.00986730180333	0.996763754045	0.00323624595469	100.344827586	1	2.65517241379	0.00862068965517
64563	billhook	0.990132698197	0.00986730180333	0.996763754045	0.00323624595469	100.344827586	1	2.65517241379	0.00862068965517
64563	long-handled sickle	0.990132698197	0.00986730180333	0.996763754045	0.00323624595469	100.344827586	1	2.65517241379	0.00862068965517
64563	wood (forest)	0.990132698197	0.00986730180333	0.996763754045	0.00323624595469	100.344827586	1	2.65517241379	0.00862068965517
64563	trees (coll.)	0.990132698197	0.00986730180333	0.996763754045	0.00323624595469	100.344827586	1	2.65517241379	0.00862068965517
59114	pork	0.994256789643	0.00574321035725	0.996734693878	0.00326530612245	173.118644068	1	1.8813559322	0.00616332819723
59114	piglet	0.994256789643	0.00574321035725	0.996734693878	0.00326530612245	173.118644068	1	1.8813559322	0.00616332819723
59114	fem. w. boar	0.994256789643	0.00574321035725	0.996734693878	0.00326530612245	173.118644068	1	1.8813559322	0.00616332819723
59114	sowgelder	0.994256789643	0.00574321035725	0.996734693878	0.00326530612245	173.118644068	1	1.8813559322	0.00616332819723
59114	w. pig	0.994256789643	0.00574321035725	0.996734693878	0.00326530612245	173.118644068	1	1.8813559322	0.00616332819723
59114	nose	0.994256789643	0.00574321035725	0.996734693878	0.00326530612245	173.118644068	1	1.8813559322	0.00616332819723
59114	fem. adult pig	0.994256789643	0.00574321035725	0.996734693878	0.00326530612245	173.118644068	1	1.8813559322	0.00616332819723
59114	pigpen	0.994256789643	0.00574321035725	0.996734693878	0.00326530612245	173.118644068	1	1.8813559322	0.00616332819723
59114	filthy person	0.994256789643	0.00574321035725	0.996734693878	0.00326530612245	173.118644068	1	1.8813559322	0.00616332819723
59114	cutting blade of plow	0.994256789643	0.00574321035725	0.996734693878	0.00326530612245	173.118644068	1	1.8813559322	0.00616332819723
59114	swine	0.994256789643	0.00574321035725	0.996734693878	0.00326530612245	173.118644068	1	1.8813559322	0.00616332819723
59114	coulter	0.994256789643	0.00574321035725	0.996734693878	0.00326530612245	173.118644068	1	1.8813559322	0.00616332819723
64563	wilderness	0.979748603352	0.020251396648	0.996721311475	0.00327868852459	96.7586206897	2	5.24137931034	0.0172413793103
64563	hoe	0.979748603352	0.020251396648	0.996721311475	0.00327868852459	96.7586206897	2	5.24137931034	0.0172413793103
64563	long-handled sickle used to debranch trees	0.979748603352	0.020251396648	0.996721311475	0.00327868852459	96.7586206897	2	5.24137931034	0.0172413793103
64563	fallow deer	0.979748603352	0.020251396648	0.996721311475	0.00327868852459	96.7586206897	2	5.24137931034	0.0172413793103
64563	two-pronged fork	0.979748603352	0.020251396648	0.996721311475	0.00327868852459	96.7586206897	2	5.24137931034	0.0172413793103
64563	(arc.) tree	0.980272108844	0.0197278911565	0.996721311475	0.00327868852459	99.3793103448	2	2.62068965517	0.00862068965517
64563	halberd	0.980272108844	0.0197278911565	0.996721311475	0.00327868852459	99.3793103448	2	2.62068965517	0.00862068965517
55866	living animal	0.880341880342	0.119658119658	0.996721311475	0.00327868852459	14.7142857143	2	2.28571428571	0.00751879699248
62008	to worry	0.980891719745	0.0191082802548	0.996718621821	0.00328137817884	51.3333333333	1	1.66666666667	0.00548696844993
62008	friendless man	0.980891719745	0.0191082802548	0.996718621821	0.00328137817884	51.3333333333	1	1.66666666667	0.00548696844993
62008	perversion	0.980891719745	0.0191082802548	0.996718621821	0.00328137817884	51.3333333333	1	1.66666666667	0.00548696844993
62008	thief	0.980891719745	0.0191082802548	0.996718621821	0.00328137817884	51.3333333333	1	1.66666666667	0.00548696844993
62008	ill-natured person	0.980891719745	0.0191082802548	0.996718621821	0.00328137817884	51.3333333333	1	1.66666666667	0.00548696844993
62008	villain	0.980891719745	0.0191082802548	0.996718621821	0.00328137817884	51.3333333333	1	1.66666666667	0.00548696844993
62008	vagabond	0.980891719745	0.0191082802548	0.996718621821	0.00328137817884	51.3333333333	1	1.66666666667	0.00548696844993
62008	devil	0.980891719745	0.0191082802548	0.996718621821	0.00328137817884	51.3333333333	1	1.66666666667	0.00548696844993
62008	to tighten	0.980891719745	0.0191082802548	0.996718621821	0.00328137817884	51.3333333333	1	1.66666666667	0.00548696844993
62008	noose	0.980891719745	0.0191082802548	0.996718621821	0.00328137817884	51.3333333333	1	1.66666666667	0.00548696844993
62008	sin	0.980891719745	0.0191082802548	0.996718621821	0.00328137817884	51.3333333333	1	1.66666666667	0.00548696844993
62008	malefactor	0.980891719745	0.0191082802548	0.996718621821	0.00328137817884	51.3333333333	1	1.66666666667	0.00548696844993
62008	evil being	0.980891719745	0.0191082802548	0.996718621821	0.00328137817884	51.3333333333	1	1.66666666667	0.00548696844993
62008	monster	0.980891719745	0.0191082802548	0.996718621821	0.00328137817884	51.3333333333	1	1.66666666667	0.00548696844993
62008	robber	0.980891719745	0.0191082802548	0.996718621821	0.00328137817884	51.3333333333	1	1.66666666667	0.00548696844993
62008	to kill by pieceing and shaking	0.980891719745	0.0191082802548	0.996718621821	0.00328137817884	51.3333333333	1	1.66666666667	0.00548696844993
62008	to seize by the throat	0.980891719745	0.0191082802548	0.996718621821	0.00328137817884	51.3333333333	1	1.66666666667	0.00548696844993
62008	to restrict	0.980891719745	0.0191082802548	0.996718621821	0.00328137817884	51.3333333333	1	1.66666666667	0.00548696844993
62008	pirate	0.980891719745	0.0191082802548	0.996718621821	0.00328137817884	51.3333333333	1	1.66666666667	0.00548696844993
62008	to press	0.980891719745	0.0191082802548	0.996718621821	0.00328137817884	51.3333333333	1	1.66666666667	0.00548696844993
59114	pertaining to pigs	0.988390397481	0.0116096025187	0.996705107084	0.00329489291598	170.271186441	2	3.72881355932	0.0123266563945
59114	plowshare	0.988390397481	0.0116096025187	0.996705107084	0.00329489291598	170.271186441	2	3.72881355932	0.0123266563945
59114	snout	0.982400318186	0.0175996818137	0.996674979219	0.00332502078138	167.457627119	3	5.54237288136	0.0184899845917
59610	sow	0.385365853659	0.614634146341	0.996666666667	0.00333333333333	5.64285714286	9	8.35714285714	0.027950310559
62008	accursed	0.960583941606	0.0394160583942	0.996644295302	0.00335570469799	48.7407407407	2	3.25925925926	0.0109739368999
62008	to kill	0.960583941606	0.0394160583942	0.996644295302	0.00335570469799	48.7407407407	2	3.25925925926	0.0109739368999
62008	w. person	0.960583941606	0.0394160583942	0.996644295302	0.00335570469799	48.7407407407	2	3.25925925926	0.0109739368999
62008	evil	0.960583941606	0.0394160583942	0.996644295302	0.00335570469799	48.7407407407	2	3.25925925926	0.0109739368999
62008	to suffocate	0.960583941606	0.0394160583942	0.996644295302	0.00335570469799	48.7407407407	2	3.25925925926	0.0109739368999
62008	to tie	0.960583941606	0.0394160583942	0.996644295302	0.00335570469799	48.7407407407	2	3.25925925926	0.0109739368999
64563	timber	0.957352941176	0.0426470588235	0.996632996633	0.003367003367	89.7931034483	4	10.2068965517	0.0344827586207
64563	war scythe	0.957352941176	0.0426470588235	0.996632996633	0.003367003367	89.7931034483	4	10.2068965517	0.0344827586207
64563	firewood	0.957352941176	0.0426470588235	0.996632996633	0.003367003367	89.7931034483	4	10.2068965517	0.0344827586207
64563	tree (not log)	0.957352941176	0.0426470588235	0.996632996633	0.003367003367	89.7931034483	4	10.2068965517	0.0344827586207
71144	greasy	0.791666666667	0.208333333333	0.996617812852	0.00338218714769	19.0	5	10.0	0.0339366515837
59114	boar	0.970047720581	0.0299522794192	0.996613039797	0.00338696020322	161.93220339	5	9.06779661017	0.0308166409861
59114	plow-share	0.970047720581	0.0299522794192	0.996613039797	0.00338696020322	161.93220339	5	9.06779661017	0.0308166409861
93629	to tie up	0.78021978022	0.21978021978	0.996610169492	0.00338983050847	17.75	5	5.25	0.0178571428571
70645	fat (organic substance)	0.982813494589	0.0171865054106	0.996610169492	0.00338983050847	57.1851851852	1	1.81481481481	0.00617283950617
70645	even	0.982813494589	0.0171865054106	0.996610169492	0.00338983050847	57.1851851852	1	1.81481481481	0.00617283950617
70645	richness	0.982813494589	0.0171865054106	0.996610169492	0.00338983050847	57.1851851852	1	1.81481481481	0.00617283950617
70645	fatness	0.982813494589	0.0171865054106	0.996610169492	0.00338983050847	57.1851851852	1	1.81481481481	0.00617283950617
70645	animal fat	0.982813494589	0.0171865054106	0.996610169492	0.00338983050847	57.1851851852	1	1.81481481481	0.00617283950617
70645	greasy	0.982813494589	0.0171865054106	0.996610169492	0.00338983050847	57.1851851852	1	1.81481481481	0.00617283950617
70645	oil	0.982813494589	0.0171865054106	0.996610169492	0.00338983050847	57.1851851852	1	1.81481481481	0.00617283950617
70645	ointment	0.982813494589	0.0171865054106	0.996610169492	0.00338983050847	57.1851851852	1	1.81481481481	0.00617283950617
70645	mark, smudge or stain made by smearing	0.982813494589	0.0171865054106	0.996610169492	0.00338983050847	57.1851851852	1	1.81481481481	0.00617283950617
70645	pus	0.982813494589	0.0171865054106	0.996610169492	0.00338983050847	57.1851851852	1	1.81481481481	0.00617283950617
70645	smooth	0.982813494589	0.0171865054106	0.996610169492	0.00338983050847	57.1851851852	1	1.81481481481	0.00617283950617
70645	slippery	0.982813494589	0.0171865054106	0.996610169492	0.00338983050847	57.1851851852	1	1.81481481481	0.00617283950617
76535	harvest time	0.983490566038	0.0165094339623	0.99658808933	0.00341191066998	59.5714285714	1	2.42857142857	0.00831443688587
76535	nail	0.983490566038	0.0165094339623	0.99658808933	0.00341191066998	59.5714285714	1	2.42857142857	0.00831443688587
76535	to split	0.983490566038	0.0165094339623	0.99658808933	0.00341191066998	59.5714285714	1	2.42857142857	0.00831443688587
76535	to sting	0.983490566038	0.0165094339623	0.99658808933	0.00341191066998	59.5714285714	1	2.42857142857	0.00831443688587
76535	to burst	0.983490566038	0.0165094339623	0.99658808933	0.00341191066998	59.5714285714	1	2.42857142857	0.00831443688587
76535	fibula (?)	0.983490566038	0.0165094339623	0.99658808933	0.00341191066998	59.5714285714	1	2.42857142857	0.00831443688587
76535	field	0.983490566038	0.0165094339623	0.99658808933	0.00341191066998	59.5714285714	1	2.42857142857	0.00831443688587
76535	carve	0.983490566038	0.0165094339623	0.99658808933	0.00341191066998	59.5714285714	1	2.42857142857	0.00831443688587
76535	peg	0.983490566038	0.0165094339623	0.99658808933	0.00341191066998	59.5714285714	1	2.42857142857	0.00831443688587
76535	to reap (harvest work, harvest time, also a field)	0.983490566038	0.0165094339623	0.99658808933	0.00341191066998	59.5714285714	1	2.42857142857	0.00831443688587
76535	needle	0.983490566038	0.0165094339623	0.99658808933	0.00341191066998	59.5714285714	1	2.42857142857	0.00831443688587
76535	sickle	0.983490566038	0.0165094339623	0.99658808933	0.00341191066998	59.5714285714	1	2.42857142857	0.00831443688587
76535	pointed implement	0.983490566038	0.0165094339623	0.99658808933	0.00341191066998	59.5714285714	1	2.42857142857	0.00831443688587
76535	harvest work	0.983490566038	0.0165094339623	0.99658808933	0.00341191066998	59.5714285714	1	2.42857142857	0.00831443688587
76535	to carve	0.983490566038	0.0165094339623	0.99658808933	0.00341191066998	59.5714285714	1	2.42857142857	0.00831443688587
76535	fibula	0.983490566038	0.0165094339623	0.99658808933	0.00341191066998	59.5714285714	1	2.42857142857	0.00831443688587
76535	spine	0.983490566038	0.0165094339623	0.99658808933	0.00341191066998	59.5714285714	1	2.42857142857	0.00831443688587
76535	jewel	0.983490566038	0.0165094339623	0.99658808933	0.00341191066998	59.5714285714	1	2.42857142857	0.00831443688587
76535	to reap	0.983490566038	0.0165094339623	0.99658808933	0.00341191066998	59.5714285714	1	2.42857142857	0.00831443688587
76535	skewer	0.983490566038	0.0165094339623	0.99658808933	0.00341191066998	59.5714285714	1	2.42857142857	0.00831443688587
76535	sharp point	0.983490566038	0.0165094339623	0.99658808933	0.00341191066998	59.5714285714	1	2.42857142857	0.00831443688587
76535	to divide	0.983490566038	0.0165094339623	0.99658808933	0.00341191066998	59.5714285714	1	2.42857142857	0.00831443688587
70645	lard	0.964566929134	0.0354330708661	0.996539792388	0.00346020761246	54.4444444444	2	3.55555555556	0.0123456790123
70645	to anoint	0.964566929134	0.0354330708661	0.996539792388	0.00346020761246	54.4444444444	2	3.55555555556	0.0123456790123
70645	suet	0.964566929134	0.0354330708661	0.996539792388	0.00346020761246	54.4444444444	2	3.55555555556	0.0123456790123
70645	pith of a tree	0.964566929134	0.0354330708661	0.996539792388	0.00346020761246	54.4444444444	2	3.55555555556	0.0123456790123
61223	f. animal (dog, fox, wolf, sheep)	0.93956043956	0.0604395604396	0.996539792388	0.00346020761246	15.5454545455	1	1.45454545455	0.00505050505051
61223	fem. animal (dog, fox, sheep)	0.93956043956	0.0604395604396	0.996539792388	0.00346020761246	15.5454545455	1	1.45454545455	0.00505050505051
69907	drinking bout	0.940677966102	0.0593220338983	0.996539792388	0.00346020761246	15.8571428571	1	1.14285714286	0.00396825396825
69907	honey drink	0.940677966102	0.0593220338983	0.996539792388	0.00346020761246	15.8571428571	1	1.14285714286	0.00396825396825
93282	radish	0.941176470588	0.0588235294118	0.996539792388	0.00346020761246	16.0	1	1.0	0.00347222222222
93282	fasting food	0.941176470588	0.0588235294118	0.996539792388	0.00346020761246	16.0	1	1.0	0.00347222222222
93282	pumpkin	0.941176470588	0.0588235294118	0.996539792388	0.00346020761246	16.0	1	1.0	0.00347222222222
76535	dagger	0.965658217498	0.034341782502	0.99652008858	0.00347991142044	56.2380952381	2	4.7619047619	0.0166288737717
76535	to cut	0.965658217498	0.034341782502	0.99652008858	0.00347991142044	56.2380952381	2	4.7619047619	0.0166288737717
76535	prickle	0.965658217498	0.034341782502	0.99652008858	0.00347991142044	56.2380952381	2	4.7619047619	0.0166288737717
55486	barrow	0.448405253283	0.551594746717	0.996515679443	0.00348432055749	11.380952381	14	13.619047619	0.047619047619
62008	criminal	0.916279069767	0.0837209302326	0.996485061511	0.00351493848858	43.7777777778	4	6.22222222222	0.0219478737997
71144	fat (organic substance)	0.732876712329	0.267123287671	0.996483001172	0.00351699882767	16.4615384615	6	11.5384615385	0.0407239819005
76535	buckle	0.946428571429	0.0535714285714	0.996449322143	0.00355067785668	53.0	3	7.0	0.0249433106576
76535	clasp	0.946428571429	0.0535714285714	0.996449322143	0.00355067785668	53.0	3	7.0	0.0249433106576
76535	thorn	0.946428571429	0.0535714285714	0.996449322143	0.00355067785668	53.0	3	7.0	0.0249433106576
76535	spike	0.948571428571	0.0514285714286	0.996449322143	0.00355067785668	55.3333333333	3	4.66666666667	0.0166288737717
64563	tree (coll.)	0.908155186065	0.0918448139351	0.996441281139	0.00355871886121	79.1034482759	8	16.8965517241	0.0603448275862
64563	forest	0.91063174114	0.0893682588598	0.996441281139	0.00355871886121	81.5172413793	8	14.4827586207	0.051724137931
68354	narrow garment	0.965884861407	0.0341151385928	0.996428571429	0.00357142857143	28.3125	1	1.6875	0.00604838709677
68354	food	0.965884861407	0.0341151385928	0.996428571429	0.00357142857143	28.3125	1	1.6875	0.00604838709677
68354	to feed	0.965884861407	0.0341151385928	0.996428571429	0.00357142857143	28.3125	1	1.6875	0.00604838709677
68354	inner lining (of a garment)	0.965884861407	0.0341151385928	0.996428571429	0.00357142857143	28.3125	1	1.6875	0.00604838709677
68354	scabbard	0.965884861407	0.0341151385928	0.996428571429	0.00357142857143	28.3125	1	1.6875	0.00604838709677
77626	hoe	0.966101694915	0.0338983050847	0.996428571429	0.00357142857143	28.5	1	1.5	0.00537634408602
77626	measure of land	0.966101694915	0.0338983050847	0.996428571429	0.00357142857143	28.5	1	1.5	0.00537634408602
77626	tree	0.966101694915	0.0338983050847	0.996428571429	0.00357142857143	28.5	1	1.5	0.00537634408602
77626	paddle	0.966101694915	0.0338983050847	0.996428571429	0.00357142857143	28.5	1	1.5	0.00537634408602
77626	branch	0.966101694915	0.0338983050847	0.996428571429	0.00357142857143	28.5	1	1.5	0.00537634408602
77626	agricultural tool	0.966101694915	0.0338983050847	0.996428571429	0.00357142857143	28.5	1	1.5	0.00537634408602
77626	to row	0.966101694915	0.0338983050847	0.996428571429	0.00357142857143	28.5	1	1.5	0.00537634408602
77626	forest	0.966101694915	0.0338983050847	0.996428571429	0.00357142857143	28.5	1	1.5	0.00537634408602
70645	to smear	0.924791086351	0.075208913649	0.996389891697	0.00361010830325	49.1851851852	4	6.81481481481	0.0246913580247
70645	tallow	0.924791086351	0.075208913649	0.996389891697	0.00361010830325	49.1851851852	4	6.81481481481	0.0246913580247
84998	layer	0.98127090301	0.01872909699	0.996376811594	0.0036231884058	52.3928571429	1	1.60714285714	0.00584415584416
84998	sprout	0.98127090301	0.01872909699	0.996376811594	0.0036231884058	52.3928571429	1	1.60714285714	0.00584415584416
84998	wood (small forest)	0.98127090301	0.01872909699	0.996376811594	0.0036231884058	52.3928571429	1	1.60714285714	0.00584415584416
84998	piece of wood	0.98127090301	0.01872909699	0.996376811594	0.0036231884058	52.3928571429	1	1.60714285714	0.00584415584416
84998	clearing in forest	0.98127090301	0.01872909699	0.996376811594	0.0036231884058	52.3928571429	1	1.60714285714	0.00584415584416
84998	water trough	0.98127090301	0.01872909699	0.996376811594	0.0036231884058	52.3928571429	1	1.60714285714	0.00584415584416
84998	stony infertile ground often wooded	0.98127090301	0.01872909699	0.996376811594	0.0036231884058	52.3928571429	1	1.60714285714	0.00584415584416
84998	pile	0.98127090301	0.01872909699	0.996376811594	0.0036231884058	52.3928571429	1	1.60714285714	0.00584415584416
84998	branch	0.98127090301	0.01872909699	0.996376811594	0.0036231884058	52.3928571429	1	1.60714285714	0.00584415584416
84998	wooden beam to used in shipbuilding	0.98127090301	0.01872909699	0.996376811594	0.0036231884058	52.3928571429	1	1.60714285714	0.00584415584416
84998	pyre	0.98127090301	0.01872909699	0.996376811594	0.0036231884058	52.3928571429	1	1.60714285714	0.00584415584416
84998	twig	0.98127090301	0.01872909699	0.996376811594	0.0036231884058	52.3928571429	1	1.60714285714	0.00584415584416
55567	sheep	0.957317073171	0.0426829268293	0.996376811594	0.0036231884058	22.4285714286	1	1.57142857143	0.00571428571429
55567	s. animal	0.957317073171	0.0426829268293	0.996376811594	0.0036231884058	22.4285714286	1	1.57142857143	0.00571428571429
55567	s. cattle	0.957317073171	0.0426829268293	0.996376811594	0.0036231884058	22.4285714286	1	1.57142857143	0.00571428571429
55567	possessions	0.957317073171	0.0426829268293	0.996376811594	0.0036231884058	22.4285714286	1	1.57142857143	0.00571428571429
55567	ox	0.957317073171	0.0426829268293	0.996376811594	0.0036231884058	22.4285714286	1	1.57142857143	0.00571428571429
55567	beast	0.957317073171	0.0426829268293	0.996376811594	0.0036231884058	22.4285714286	1	1.57142857143	0.00571428571429
55567	animal not usually consumed by man	0.957317073171	0.0426829268293	0.996376811594	0.0036231884058	22.4285714286	1	1.57142857143	0.00571428571429
55567	small	0.957317073171	0.0426829268293	0.996376811594	0.0036231884058	22.4285714286	1	1.57142857143	0.00571428571429
55567	breed of sheep	0.957317073171	0.0426829268293	0.996376811594	0.0036231884058	22.4285714286	1	1.57142857143	0.00571428571429
55567	property	0.957317073171	0.0426829268293	0.996376811594	0.0036231884058	22.4285714286	1	1.57142857143	0.00571428571429
55567	goat	0.957317073171	0.0426829268293	0.996376811594	0.0036231884058	22.4285714286	1	1.57142857143	0.00571428571429
55567	y. cow	0.957317073171	0.0426829268293	0.996376811594	0.0036231884058	22.4285714286	1	1.57142857143	0.00571428571429
55146	fallow deer	0.496368038741	0.503631961259	0.996368917938	0.00363108206245	15.7692307692	16	17.2307692308	0.0627943485086
78202	pin	0.978260869565	0.0217391304348	0.996367410483	0.00363258951738	45.0	1	2.0	0.00729166666667
78202	hay-fork	0.978260869565	0.0217391304348	0.996367410483	0.00363258951738	45.0	1	2.0	0.00729166666667
78202	deer	0.978260869565	0.0217391304348	0.996367410483	0.00363258951738	45.0	1	2.0	0.00729166666667
78202	spear	0.978260869565	0.0217391304348	0.996367410483	0.00363258951738	45.0	1	2.0	0.00729166666667
78202	firewood	0.978260869565	0.0217391304348	0.996367410483	0.00363258951738	45.0	1	2.0	0.00729166666667
78202	brushwood	0.978260869565	0.0217391304348	0.996367410483	0.00363258951738	45.0	1	2.0	0.00729166666667
78202	wide-branching	0.978260869565	0.0217391304348	0.996367410483	0.00363258951738	45.0	1	2.0	0.00729166666667
78202	peg	0.978260869565	0.0217391304348	0.996367410483	0.00363258951738	45.0	1	2.0	0.00729166666667
78202	brace	0.978260869565	0.0217391304348	0.996367410483	0.00363258951738	45.0	1	2.0	0.00729166666667
78202	beard	0.978260869565	0.0217391304348	0.996367410483	0.00363258951738	45.0	1	2.0	0.00729166666667
78202	fork	0.978260869565	0.0217391304348	0.996367410483	0.00363258951738	45.0	1	2.0	0.00729166666667
78202	pole with a cross-beam	0.978260869565	0.0217391304348	0.996367410483	0.00363258951738	45.0	1	2.0	0.00729166666667
78202	part of plow	0.978260869565	0.0217391304348	0.996367410483	0.00363258951738	45.0	1	2.0	0.00729166666667
78202	forked stick	0.978260869565	0.0217391304348	0.996367410483	0.00363258951738	45.0	1	2.0	0.00729166666667
78202	club	0.978260869565	0.0217391304348	0.996367410483	0.00363258951738	45.0	1	2.0	0.00729166666667
78202	wooden plow	0.978260869565	0.0217391304348	0.996367410483	0.00363258951738	45.0	1	2.0	0.00729166666667
78202	awn	0.978260869565	0.0217391304348	0.996367410483	0.00363258951738	45.0	1	2.0	0.00729166666667
78202	two-pronged fork	0.978260869565	0.0217391304348	0.996367410483	0.00363258951738	45.0	1	2.0	0.00729166666667
78202	yoke	0.978260869565	0.0217391304348	0.996367410483	0.00363258951738	45.0	1	2.0	0.00729166666667
78202	statue	0.978260869565	0.0217391304348	0.996367410483	0.00363258951738	45.0	1	2.0	0.00729166666667
78202	harrow	0.978260869565	0.0217391304348	0.996367410483	0.00363258951738	45.0	1	2.0	0.00729166666667
78202	tassel	0.978260869565	0.0217391304348	0.996367410483	0.00363258951738	45.0	1	2.0	0.00729166666667
78202	wooden collar	0.978260869565	0.0217391304348	0.996367410483	0.00363258951738	45.0	1	2.0	0.00729166666667
78202	fringe	0.978260869565	0.0217391304348	0.996367410483	0.00363258951738	45.0	1	2.0	0.00729166666667
78202	pitchfork	0.978260869565	0.0217391304348	0.996367410483	0.00363258951738	45.0	1	2.0	0.00729166666667
78202	thorny plant	0.978260869565	0.0217391304348	0.996367410483	0.00363258951738	45.0	1	2.0	0.00729166666667
78202	sculpture	0.978260869565	0.0217391304348	0.996367410483	0.00363258951738	45.0	1	2.0	0.00729166666667
78202	ramification of a branch	0.978260869565	0.0217391304348	0.996367410483	0.00363258951738	45.0	1	2.0	0.00729166666667
78202	plowbeam	0.978260869565	0.0217391304348	0.996367410483	0.00363258951738	45.0	1	2.0	0.00729166666667
58071	fem. deer, esp. red deer	0.974040632054	0.0259593679458	0.996336996337	0.003663003663	37.5217391304	1	1.47826086957	0.0054347826087
58071	fem. (red or sika) deer	0.974040632054	0.0259593679458	0.996336996337	0.003663003663	37.5217391304	1	1.47826086957	0.0054347826087
58071	pricket	0.974040632054	0.0259593679458	0.996336996337	0.003663003663	37.5217391304	1	1.47826086957	0.0054347826087
58071	young deer	0.974040632054	0.0259593679458	0.996336996337	0.003663003663	37.5217391304	1	1.47826086957	0.0054347826087
58071	young dog	0.974040632054	0.0259593679458	0.996336996337	0.003663003663	37.5217391304	1	1.47826086957	0.0054347826087
58071	castrated ram	0.974040632054	0.0259593679458	0.996336996337	0.003663003663	37.5217391304	1	1.47826086957	0.0054347826087
58071	fem. (red) deer	0.974040632054	0.0259593679458	0.996336996337	0.003663003663	37.5217391304	1	1.47826086957	0.0054347826087
58071	mutilated	0.974040632054	0.0259593679458	0.996336996337	0.003663003663	37.5217391304	1	1.47826086957	0.0054347826087
58071	raspberry	0.974040632054	0.0259593679458	0.996336996337	0.003663003663	37.5217391304	1	1.47826086957	0.0054347826087
58071	to mutilate	0.974040632054	0.0259593679458	0.996336996337	0.003663003663	37.5217391304	1	1.47826086957	0.0054347826087
70645	marrow	0.903225806452	0.0967741935484	0.9963099631	0.00369003690037	46.6666666667	5	8.33333333333	0.0308641975309
61223	fem. sheep	0.869047619048	0.130952380952	0.9963099631	0.00369003690037	13.2727272727	2	2.72727272727	0.010101010101
61223	low-bred or coarse dog	0.869047619048	0.130952380952	0.9963099631	0.00369003690037	13.2727272727	2	2.72727272727	0.010101010101
61223	mongrel	0.869047619048	0.130952380952	0.9963099631	0.00369003690037	13.2727272727	2	2.72727272727	0.010101010101
69907	ale vessel	0.873873873874	0.126126126126	0.9963099631	0.00369003690037	13.8571428571	2	2.14285714286	0.00793650793651
76535	pin	0.903492647059	0.0965073529412	0.996298788694	0.00370121130552	46.8095238095	5	11.1904761905	0.0415721844293
76535	brooch	0.903492647059	0.0965073529412	0.996298788694	0.00370121130552	46.8095238095	5	11.1904761905	0.0415721844293
84998	grove	0.961432506887	0.0385674931129	0.996294771511	0.00370522848909	49.8571428571	2	3.14285714286	0.0116883116883
84998	wood (little forest)	0.961432506887	0.0385674931129	0.996294771511	0.00370522848909	49.8571428571	2	3.14285714286	0.0116883116883
84998	piece of wood made for a particular purpose	0.961432506887	0.0385674931129	0.996294771511	0.00370522848909	49.8571428571	2	3.14285714286	0.0116883116883
68354	to guard	0.927927927928	0.0720720720721	0.996291718171	0.00370828182942	25.75	2	3.25	0.0120967741935
68354	fur garment	0.927927927928	0.0720720720721	0.996291718171	0.00370828182942	25.75	2	3.25	0.0120967741935
68354	to line with fur	0.927927927928	0.0720720720721	0.996291718171	0.00370828182942	25.75	2	3.25	0.0120967741935
77626	rower	0.928853754941	0.0711462450593	0.996291718171	0.00370828182942	26.1111111111	2	2.88888888889	0.010752688172
78202	the plow (constellation)	0.954648526077	0.0453514739229	0.996274614156	0.00372538584353	42.1	2	3.9	0.0145833333333
78202	twig	0.954648526077	0.0453514739229	0.996274614156	0.00372538584353	42.1	2	3.9	0.0145833333333
71299	animal fat	0.367256637168	0.632743362832	0.996226415094	0.00377358490566	6.38461538462	11	18.6153846154	0.0705128205128
84998	beam	0.940467753366	0.0595322466336	0.996208930076	0.00379106992418	47.3928571429	3	4.60714285714	0.0175324675325
55567	louse	0.909090909091	0.0909090909091	0.996204933586	0.00379506641366	20.0	2	3.0	0.0114285714286
55567	insect	0.909090909091	0.0909090909091	0.996204933586	0.00379506641366	20.0	2	3.0	0.0114285714286
78202	(wooden) plow	0.929078014184	0.0709219858156	0.996176952485	0.00382304751502	39.3	3	5.7	0.021875
64563	tree	0.814102564103	0.185897435897	0.996108949416	0.00389105058366	61.3103448276	14	28.6896551724	0.112068965517
88501	of the first to shearing (wool)	0.98362720403	0.0163727959698	0.99609375	0.00390625	60.0769230769	1	3.92307692308	0.0153846153846
88501	fury	0.98362720403	0.0163727959698	0.99609375	0.00390625	60.0769230769	1	3.92307692308	0.0153846153846
88501	ripe fruit	0.98362720403	0.0163727959698	0.99609375	0.00390625	60.0769230769	1	3.92307692308	0.0153846153846
88501	spring seed	0.98362720403	0.0163727959698	0.99609375	0.00390625	60.0769230769	1	3.92307692308	0.0153846153846
88501	one and a half year-old sheep	0.98362720403	0.0163727959698	0.99609375	0.00390625	60.0769230769	1	3.92307692308	0.0153846153846
88501	vegetables	0.98362720403	0.0163727959698	0.99609375	0.00390625	60.0769230769	1	3.92307692308	0.0153846153846
88501	ewe	0.98362720403	0.0163727959698	0.99609375	0.00390625	60.0769230769	1	3.92307692308	0.0153846153846
88501	summer fruit	0.98362720403	0.0163727959698	0.99609375	0.00390625	60.0769230769	1	3.92307692308	0.0153846153846
88501	yearling lamb	0.98362720403	0.0163727959698	0.99609375	0.00390625	60.0769230769	1	3.92307692308	0.0153846153846
88501	spring barley	0.98362720403	0.0163727959698	0.99609375	0.00390625	60.0769230769	1	3.92307692308	0.0153846153846
88501	yearling	0.98362720403	0.0163727959698	0.99609375	0.00390625	60.0769230769	1	3.92307692308	0.0153846153846
71394	heavy	0.928571428571	0.0714285714286	0.99609375	0.00390625	13.0	1	3.0	0.0117647058824
71394	slow	0.928571428571	0.0714285714286	0.99609375	0.00390625	13.0	1	3.0	0.0117647058824
71394	immobile	0.928571428571	0.0714285714286	0.99609375	0.00390625	13.0	1	3.0	0.0117647058824
71394	fat (organic substance)	0.928571428571	0.0714285714286	0.99609375	0.00390625	13.0	1	3.0	0.0117647058824
71394	fatness	0.928571428571	0.0714285714286	0.99609375	0.00390625	13.0	1	3.0	0.0117647058824
71394	oil, esp. for alimentary uses	0.928571428571	0.0714285714286	0.99609375	0.00390625	13.0	1	3.0	0.0117647058824
71394	clumsy	0.928571428571	0.0714285714286	0.99609375	0.00390625	13.0	1	3.0	0.0117647058824
71394	stupid	0.928571428571	0.0714285714286	0.99609375	0.00390625	13.0	1	3.0	0.0117647058824
71394	swollen	0.928571428571	0.0714285714286	0.99609375	0.00390625	13.0	1	3.0	0.0117647058824
71394	obesity	0.928571428571	0.0714285714286	0.99609375	0.00390625	13.0	1	3.0	0.0117647058824
71394	swollen with the cold	0.928571428571	0.0714285714286	0.99609375	0.00390625	13.0	1	3.0	0.0117647058824
57224	a f. animal which has just given birth	0.931034482759	0.0689655172414	0.99609375	0.00390625	13.5	1	2.5	0.00980392156863
57224	y. of the deer	0.931034482759	0.0689655172414	0.99609375	0.00390625	13.5	1	2.5	0.00980392156863
57224	young of a w. animal	0.931034482759	0.0689655172414	0.99609375	0.00390625	13.5	1	2.5	0.00980392156863
57224	ewe	0.931034482759	0.0689655172414	0.99609375	0.00390625	13.5	1	2.5	0.00980392156863
57224	offspring	0.931034482759	0.0689655172414	0.99609375	0.00390625	13.5	1	2.5	0.00980392156863
57224	young animal	0.931034482759	0.0689655172414	0.99609375	0.00390625	13.5	1	2.5	0.00980392156863
57224	breeding	0.931034482759	0.0689655172414	0.99609375	0.00390625	13.5	1	2.5	0.00980392156863
57224	young deer	0.931034482759	0.0689655172414	0.99609375	0.00390625	13.5	1	2.5	0.00980392156863
57224	parturition	0.931034482759	0.0689655172414	0.99609375	0.00390625	13.5	1	2.5	0.00980392156863
57224	fem. sheep	0.931034482759	0.0689655172414	0.99609375	0.00390625	13.5	1	2.5	0.00980392156863
71333	fat	0.937219730942	0.0627802690583	0.99609375	0.00390625	14.9285714286	1	1.07142857143	0.00420168067227
78202	branch	0.901477832512	0.0985221674877	0.996074032529	0.00392596747056	36.6	4	7.4	0.0291666666667
61223	ewe	0.788461538462	0.211538461538	0.99604743083	0.00395256916996	11.1818181818	3	3.81818181818	0.0151515151515
67947	fur breeches	0.952380952381	0.047619047619	0.99604743083	0.00395256916996	20.0	1	3.0	0.0119047619048
67947	shaggy	0.952380952381	0.047619047619	0.99604743083	0.00395256916996	20.0	1	3.0	0.0119047619048
67947	woolly	0.952380952381	0.047619047619	0.99604743083	0.00395256916996	20.0	1	3.0	0.0119047619048
67947	overgrown	0.952380952381	0.047619047619	0.99604743083	0.00395256916996	20.0	1	3.0	0.0119047619048
69907	ale	0.8	0.2	0.99604743083	0.00395256916996	12.0	3	3.0	0.0119047619048
93282	to turn bitter	0.80487804878	0.19512195122	0.99604743083	0.00395256916996	12.375	3	2.625	0.0104166666667
93282	unripe	0.80487804878	0.19512195122	0.99604743083	0.00395256916996	12.375	3	2.625	0.0104166666667
93282	sweet	0.80487804878	0.19512195122	0.99604743083	0.00395256916996	12.375	3	2.625	0.0104166666667
71299	tallow	0.277777777778	0.722222222222	0.99604743083	0.00395256916996	4.61538461538	12	19.3846153846	0.0769230769231
70645	fat	0.831775700935	0.168224299065	0.99604743083	0.00395256916996	39.5555555556	8	12.4444444444	0.0493827160494
88501	y. goat	0.965100671141	0.0348993288591	0.996015936255	0.00398406374502	55.3076923077	2	7.69230769231	0.0307692307692
88501	spring crop	0.965100671141	0.0348993288591	0.996015936255	0.00398406374502	55.3076923077	2	7.69230769231	0.0307692307692
58071	hornless	0.884422110553	0.115577889447	0.995983935743	0.00401606425703	30.6086956522	4	5.39130434783	0.0217391304348
59431	sow	0.987852921865	0.0121470781353	0.995983935743	0.00401606425703	81.3243243243	1	1.67567567568	0.00675675675676
59431	to catch	0.987852921865	0.0121470781353	0.995983935743	0.00401606425703	81.3243243243	1	1.67567567568	0.00675675675676
59431	piglets (coll.)	0.987852921865	0.0121470781353	0.995983935743	0.00401606425703	81.3243243243	1	1.67567567568	0.00675675675676
59431	fat or greedy person	0.987852921865	0.0121470781353	0.995983935743	0.00401606425703	81.3243243243	1	1.67567567568	0.00675675675676
59431	suckling piglet	0.987852921865	0.0121470781353	0.995983935743	0.00401606425703	81.3243243243	1	1.67567567568	0.00675675675676
59431	fem. pig	0.987852921865	0.0121470781353	0.995983935743	0.00401606425703	81.3243243243	1	1.67567567568	0.00675675675676
59431	to hunt	0.987852921865	0.0121470781353	0.995983935743	0.00401606425703	81.3243243243	1	1.67567567568	0.00675675675676
59431	calf	0.987852921865	0.0121470781353	0.995983935743	0.00401606425703	81.3243243243	1	1.67567567568	0.00675675675676
59431	fish-net	0.987852921865	0.0121470781353	0.995983935743	0.00401606425703	81.3243243243	1	1.67567567568	0.00675675675676
59431	swine (gen.)	0.987852921865	0.0121470781353	0.995983935743	0.00401606425703	81.3243243243	1	1.67567567568	0.00675675675676
59431	catch	0.987852921865	0.0121470781353	0.995983935743	0.00401606425703	81.3243243243	1	1.67567567568	0.00675675675676
59431	bovine	0.987852921865	0.0121470781353	0.995983935743	0.00401606425703	81.3243243243	1	1.67567567568	0.00675675675676
59431	barrow	0.987852921865	0.0121470781353	0.995983935743	0.00401606425703	81.3243243243	1	1.67567567568	0.00675675675676
59431	y. piglet	0.987852921865	0.0121470781353	0.995983935743	0.00401606425703	81.3243243243	1	1.67567567568	0.00675675675676
59431	young of the pig	0.987852921865	0.0121470781353	0.995983935743	0.00401606425703	81.3243243243	1	1.67567567568	0.00675675675676
59431	hunt	0.987852921865	0.0121470781353	0.995983935743	0.00401606425703	81.3243243243	1	1.67567567568	0.00675675675676
59431	filthy person	0.987852921865	0.0121470781353	0.995983935743	0.00401606425703	81.3243243243	1	1.67567567568	0.00675675675676
59431	w. boar	0.987852921865	0.0121470781353	0.995983935743	0.00401606425703	81.3243243243	1	1.67567567568	0.00675675675676
59431	m. pig	0.987852921865	0.0121470781353	0.995983935743	0.00401606425703	81.3243243243	1	1.67567567568	0.00675675675676
70645	butter	0.805755395683	0.194244604317	0.995951417004	0.00404858299595	37.3333333333	9	13.6666666667	0.0555555555556
88083	lightning	0.978328173375	0.0216718266254	0.99593495935	0.00406504065041	45.1428571429	1	2.85714285714	0.0116618075802
88083	stick	0.978328173375	0.0216718266254	0.99593495935	0.00406504065041	45.1428571429	1	2.85714285714	0.0116618075802
88083	bolt of lightning	0.978328173375	0.0216718266254	0.99593495935	0.00406504065041	45.1428571429	1	2.85714285714	0.0116618075802
88083	pupil (eye)	0.978328173375	0.0216718266254	0.99593495935	0.00406504065041	45.1428571429	1	2.85714285714	0.0116618075802
88501	lamb?s wool	0.944126074499	0.0558739255014	0.99593495935	0.00406504065041	50.6923076923	3	11.3076923077	0.0461538461538
88501	kid	0.944126074499	0.0558739255014	0.99593495935	0.00406504065041	50.6923076923	3	11.3076923077	0.0461538461538
59431	birth of piglets	0.975217682518	0.0247823174816	0.995918367347	0.00408163265306	78.7027027027	2	3.2972972973	0.0135135135135
59431	game	0.975217682518	0.0247823174816	0.995918367347	0.00408163265306	78.7027027027	2	3.2972972973	0.0135135135135
59431	ox	0.975713816869	0.0242861831309	0.995918367347	0.00408163265306	80.3513513514	2	1.64864864865	0.00675675675676
62008	to strangle	0.754098360656	0.245901639344	0.995901639344	0.00409836065574	30.6666666667	10	13.3333333333	0.0548696844993
67947	furry	0.890625	0.109375	0.995850622407	0.00414937759336	16.2857142857	2	5.71428571429	0.0238095238095
88501	mirage	0.920367534456	0.0796324655436	0.995850622407	0.00414937759336	46.2307692308	4	14.7692307692	0.0615384615385
88501	heat	0.920367534456	0.0796324655436	0.995850622407	0.00414937759336	46.2307692308	4	14.7692307692	0.0615384615385
88501	spirit	0.920367534456	0.0796324655436	0.995850622407	0.00414937759336	46.2307692308	4	14.7692307692	0.0615384615385
88083	projectile	0.953947368421	0.0460526315789	0.995831162064	0.00416883793643	41.4285714286	2	5.57142857143	0.0233236151603
84998	log	0.845303867403	0.154696132597	0.995821727019	0.0041782729805	38.25	7	9.75	0.0409090909091
71394	stiff	0.824561403509	0.175438596491	0.995815899582	0.00418410041841	9.4	2	5.6	0.0235294117647
57224	fertile	0.837837837838	0.162162162162	0.995815899582	0.00418410041841	10.3333333333	2	4.66666666667	0.0196078431373
57224	having recently given birth	0.837837837838	0.162162162162	0.995815899582	0.00418410041841	10.3333333333	2	4.66666666667	0.0196078431373
57224	y. fallow deer	0.837837837838	0.162162162162	0.995815899582	0.00418410041841	10.3333333333	2	4.66666666667	0.0196078431373
71333	animal fat	0.866666666667	0.133333333333	0.995815899582	0.00418410041841	13.0	2	2.0	0.00840336134454
59431	pork	0.948467966574	0.0515320334262	0.995780590717	0.0042194092827	73.6216216216	4	6.37837837838	0.027027027027
59431	boar	0.948467966574	0.0515320334262	0.995780590717	0.0042194092827	73.6216216216	4	6.37837837838	0.027027027027
69907	fermented drink	0.72	0.28	0.995744680851	0.00425531914894	10.2857142857	4	3.71428571429	0.015873015873
93282	horseradish	0.728813559322	0.271186440678	0.995744680851	0.00425531914894	10.75	4	3.25	0.0138888888889
84998	block	0.824175824176	0.175824175824	0.995712243926	0.00428775607432	37.5	8	9.5	0.0409090909091
59431	farrow	0.934350603265	0.0656493967353	0.995708154506	0.00429184549356	71.1621621622	5	7.83783783784	0.0337837837838
59431	y. pig	0.934350603265	0.0656493967353	0.995708154506	0.00429184549356	71.1621621622	5	7.83783783784	0.0337837837838
58071	buck	0.815013404826	0.184986595174	0.995708154506	0.00429184549356	26.4347826087	6	7.5652173913	0.0326086956522
59114	swine (gen.)	0.794322709163	0.205677290837	0.995689655172	0.00431034482759	108.13559322	28	39.8644067797	0.172573189522
88501	lamb	0.862917398946	0.137082601054	0.995670995671	0.004329004329	37.7692307692	6	21.2307692308	0.0923076923077
88501	spring corn	0.881996974281	0.118003025719	0.995670995671	0.004329004329	44.8461538462	6	14.1538461538	0.0615384615385
68324	fluff	0.953405017921	0.0465949820789	0.995670995671	0.004329004329	20.4615384615	1	1.53846153846	0.0066889632107
68324	hair (on body)	0.953405017921	0.0465949820789	0.995670995671	0.004329004329	20.4615384615	1	1.53846153846	0.0066889632107
68324	individual hair	0.953405017921	0.0465949820789	0.995670995671	0.004329004329	20.4615384615	1	1.53846153846	0.0066889632107
68324	filament	0.953405017921	0.0465949820789	0.995670995671	0.004329004329	20.4615384615	1	1.53846153846	0.0066889632107
68324	hair (animal & human)	0.953405017921	0.0465949820789	0.995670995671	0.004329004329	20.4615384615	1	1.53846153846	0.0066889632107
80982	to pound	0.953405017921	0.0465949820789	0.995670995671	0.004329004329	20.4615384615	1	1.53846153846	0.0066889632107
80982	the foreleg of an animal used as food	0.953405017921	0.0465949820789	0.995670995671	0.004329004329	20.4615384615	1	1.53846153846	0.0066889632107
80982	to crush	0.953405017921	0.0465949820789	0.995670995671	0.004329004329	20.4615384615	1	1.53846153846	0.0066889632107
80982	club-shaped instrument in a mortar	0.953405017921	0.0465949820789	0.995670995671	0.004329004329	20.4615384615	1	1.53846153846	0.0066889632107
72491	to cultivate	0.993117140966	0.00688285903375	0.995662100457	0.00433789954338	144.288461538	1	1.71153846154	0.0074568288854
72491	ploughing	0.993117140966	0.00688285903375	0.995662100457	0.00433789954338	144.288461538	1	1.71153846154	0.0074568288854
72491	corn, growing or in sheaf	0.993117140966	0.00688285903375	0.995662100457	0.00433789954338	144.288461538	1	1.71153846154	0.0074568288854
72491	ard	0.993117140966	0.00688285903375	0.995662100457	0.00433789954338	144.288461538	1	1.71153846154	0.0074568288854
72491	corn growing or in sheaf	0.993117140966	0.00688285903375	0.995662100457	0.00433789954338	144.288461538	1	1.71153846154	0.0074568288854
72491	fallow land	0.993117140966	0.00688285903375	0.995662100457	0.00433789954338	144.288461538	1	1.71153846154	0.0074568288854
72491	agriculture	0.993117140966	0.00688285903375	0.995662100457	0.00433789954338	144.288461538	1	1.71153846154	0.0074568288854
72491	plowing-day	0.993117140966	0.00688285903375	0.995662100457	0.00433789954338	144.288461538	1	1.71153846154	0.0074568288854
72491	ridge	0.993117140966	0.00688285903375	0.995662100457	0.00433789954338	144.288461538	1	1.71153846154	0.0074568288854
72491	profit	0.993117140966	0.00688285903375	0.995662100457	0.00433789954338	144.288461538	1	1.71153846154	0.0074568288854
72491	unit of measurement of area, 1/4 acre	0.993117140966	0.00688285903375	0.995662100457	0.00433789954338	144.288461538	1	1.71153846154	0.0074568288854
72491	agricultural work	0.993117140966	0.00688285903375	0.995662100457	0.00433789954338	144.288461538	1	1.71153846154	0.0074568288854
72491	husbandry	0.993117140966	0.00688285903375	0.995662100457	0.00433789954338	144.288461538	1	1.71153846154	0.0074568288854
72491	farmer	0.993117140966	0.00688285903375	0.995662100457	0.00433789954338	144.288461538	1	1.71153846154	0.0074568288854
72491	(corn-)field	0.993117140966	0.00688285903375	0.995662100457	0.00433789954338	144.288461538	1	1.71153846154	0.0074568288854
72491	gain	0.993117140966	0.00688285903375	0.995662100457	0.00433789954338	144.288461538	1	1.71153846154	0.0074568288854
72491	unit of land measurement	0.993117140966	0.00688285903375	0.995662100457	0.00433789954338	144.288461538	1	1.71153846154	0.0074568288854
72491	plowable	0.993117140966	0.00688285903375	0.995662100457	0.00433789954338	144.288461538	1	1.71153846154	0.0074568288854
72491	flora	0.993117140966	0.00688285903375	0.995662100457	0.00433789954338	144.288461538	1	1.71153846154	0.0074568288854
72491	(pl.) crops	0.993117140966	0.00688285903375	0.995662100457	0.00433789954338	144.288461538	1	1.71153846154	0.0074568288854
72491	unit of measurement of area corresponding to 1/4 acre	0.993117140966	0.00688285903375	0.995662100457	0.00433789954338	144.288461538	1	1.71153846154	0.0074568288854
72491	meadow-sweet	0.993117140966	0.00688285903375	0.995662100457	0.00433789954338	144.288461538	1	1.71153846154	0.0074568288854
72491	man who possesses a lot of grain	0.993117140966	0.00688285903375	0.995662100457	0.00433789954338	144.288461538	1	1.71153846154	0.0074568288854
72491	to plant	0.993117140966	0.00688285903375	0.995662100457	0.00433789954338	144.288461538	1	1.71153846154	0.0074568288854
72491	the quantity of land that may be plowed in a given timeframe	0.993117140966	0.00688285903375	0.995662100457	0.00433789954338	144.288461538	1	1.71153846154	0.0074568288854
67947	thick wool	0.810810810811	0.189189189189	0.995633187773	0.00436681222707	12.8571428571	3	8.14285714286	0.0357142857143
67947	thick hair	0.810810810811	0.189189189189	0.995633187773	0.00436681222707	12.8571428571	3	8.14285714286	0.0357142857143
67947	thick fur	0.810810810811	0.189189189189	0.995633187773	0.00436681222707	12.8571428571	3	8.14285714286	0.0357142857143
72491	tillage	0.986073915372	0.0139260846277	0.995613022397	0.00438697760332	141.615384615	2	3.38461538462	0.0149136577708
72491	wooden plow	0.986073915372	0.0139260846277	0.995613022397	0.00438697760332	141.615384615	2	3.38461538462	0.0149136577708
72491	s. plow	0.986073915372	0.0139260846277	0.995613022397	0.00438697760332	141.615384615	2	3.38461538462	0.0149136577708
72491	fields	0.986073915372	0.0139260846277	0.995613022397	0.00438697760332	141.615384615	2	3.38461538462	0.0149136577708
72491	grain (before threshing)	0.986073915372	0.0139260846277	0.995613022397	0.00438697760332	141.615384615	2	3.38461538462	0.0149136577708
72491	corn (growing or before it is harvested)	0.986073915372	0.0139260846277	0.995613022397	0.00438697760332	141.615384615	2	3.38461538462	0.0149136577708
88083	thin tree	0.895910780669	0.104089219331	0.995606809445	0.00439319055464	34.4285714286	4	10.5714285714	0.0466472303207
88083	long stick	0.895910780669	0.104089219331	0.995606809445	0.00439319055464	34.4285714286	4	10.5714285714	0.0466472303207
72491	acre	0.978870377895	0.0211296221048	0.995562821112	0.00443717888837	138.980769231	3	5.01923076923	0.0223704866562
72491	s. plow without mouldboard	0.978870377895	0.0211296221048	0.995562821112	0.00443717888837	138.980769231	3	5.01923076923	0.0223704866562
72491	plant	0.978870377895	0.0211296221048	0.995562821112	0.00443717888837	138.980769231	3	5.01923076923	0.0223704866562
71919	draw	0.928571428571	0.0714285714286	0.995555555556	0.00444444444444	13.0	1	2.0	0.00892857142857
71919	corn)	0.928571428571	0.0714285714286	0.995555555556	0.00444444444444	13.0	1	2.0	0.00892857142857
71919	stretch	0.928571428571	0.0714285714286	0.995555555556	0.00444444444444	13.0	1	2.0	0.00892857142857
71919	fruits	0.928571428571	0.0714285714286	0.995555555556	0.00444444444444	13.0	1	2.0	0.00892857142857
71919	to tear (off)	0.928571428571	0.0714285714286	0.995555555556	0.00444444444444	13.0	1	2.0	0.00892857142857
71919	to pull tight	0.928571428571	0.0714285714286	0.995555555556	0.00444444444444	13.0	1	2.0	0.00892857142857
71919	to turn	0.928571428571	0.0714285714286	0.995555555556	0.00444444444444	13.0	1	2.0	0.00892857142857
71919	to braid	0.928571428571	0.0714285714286	0.995555555556	0.00444444444444	13.0	1	2.0	0.00892857142857
71919	to reap (berries	0.928571428571	0.0714285714286	0.995555555556	0.00444444444444	13.0	1	2.0	0.00892857142857
71919	spin	0.928571428571	0.0714285714286	0.995555555556	0.00444444444444	13.0	1	2.0	0.00892857142857
71919	weave	0.928571428571	0.0714285714286	0.995555555556	0.00444444444444	13.0	1	2.0	0.00892857142857
93271	(toponym)	0.933628318584	0.0663716814159	0.995555555556	0.00444444444444	14.0666666667	1	0.933333333333	0.00416666666667
72491	plowman	0.971506849315	0.0284931506849	0.995511457595	0.00448854240491	136.384615385	4	6.61538461538	0.0298273155416
71394	fat	0.673913043478	0.326086956522	0.995495495495	0.0045045045045	6.2	3	7.8	0.0352941176471
88083	water jet	0.861660079051	0.138339920949	0.995485327314	0.00451467268623	31.1428571429	5	12.8571428571	0.0583090379009
84998	forest	0.762711864407	0.237288135593	0.995475113122	0.00452488687783	32.1428571429	10	12.8571428571	0.0584415584416
72491	plowshare	0.963983931292	0.0360160687076	0.995458891013	0.00454110898662	133.826923077	5	8.17307692308	0.037284144427
72491	plowing	0.963983931292	0.0360160687076	0.995458891013	0.00454110898662	133.826923077	5	8.17307692308	0.037284144427
68324	animal hair	0.900383141762	0.0996168582375	0.995444191344	0.00455580865604	18.0769230769	2	2.92307692308	0.0133779264214
68324	down	0.900383141762	0.0996168582375	0.995444191344	0.00455580865604	18.0769230769	2	2.92307692308	0.0133779264214
80982	club-shaped instrument for grinding food etc in a mortar	0.900383141762	0.0996168582375	0.995444191344	0.00455580865604	18.0769230769	2	2.92307692308	0.0133779264214
80982	pounder	0.900383141762	0.0996168582375	0.995444191344	0.00455580865604	18.0769230769	2	2.92307692308	0.0133779264214
71144	fat	0.271028037383	0.728971962617	0.995377503852	0.00462249614792	4.46153846154	12	17.5384615385	0.0814479638009
58394	y. deer	0.990617376619	0.0093826233815	0.995327102804	0.00467289719626	105.58	1	1.42	0.00666666666667
58394	l. deer, Alces alces	0.990617376619	0.0093826233815	0.995327102804	0.00467289719626	105.58	1	1.42	0.00666666666667
58394	y. chamois	0.990617376619	0.0093826233815	0.995327102804	0.00467289719626	105.58	1	1.42	0.00666666666667
58394	deer cow	0.990617376619	0.0093826233815	0.995327102804	0.00467289719626	105.58	1	1.42	0.00666666666667
58394	red deer	0.990617376619	0.0093826233815	0.995327102804	0.00467289719626	105.58	1	1.42	0.00666666666667
58394	young deer	0.990617376619	0.0093826233815	0.995327102804	0.00467289719626	105.58	1	1.42	0.00666666666667
58394	m. antelope	0.990617376619	0.0093826233815	0.995327102804	0.00467289719626	105.58	1	1.42	0.00666666666667
58394	w. animal	0.990617376619	0.0093826233815	0.995327102804	0.00467289719626	105.58	1	1.42	0.00666666666667
58394	the flesh of a lamb as food	0.990617376619	0.0093826233815	0.995327102804	0.00467289719626	105.58	1	1.42	0.00666666666667
58394	elk cow	0.990617376619	0.0093826233815	0.995327102804	0.00467289719626	105.58	1	1.42	0.00666666666667
58394	roe	0.990617376619	0.0093826233815	0.995327102804	0.00467289719626	105.58	1	1.42	0.00666666666667
58394	the Great Bear	0.990617376619	0.0093826233815	0.995327102804	0.00467289719626	105.58	1	1.42	0.00666666666667
58394	y. of the deer, fawn	0.990617376619	0.0093826233815	0.995327102804	0.00467289719626	105.58	1	1.42	0.00666666666667
58394	doe (pl)	0.990617376619	0.0093826233815	0.995327102804	0.00467289719626	105.58	1	1.42	0.00666666666667
58394	deer calf	0.990617376619	0.0093826233815	0.995327102804	0.00467289719626	105.58	1	1.42	0.00666666666667
58394	fem. of the red deer	0.990617376619	0.0093826233815	0.995327102804	0.00467289719626	105.58	1	1.42	0.00666666666667
68211	leathern	0.982632541133	0.0173674588665	0.995311936531	0.00468806346917	56.5789473684	1	2.42105263158	0.0114035087719
68211	fur garment	0.982632541133	0.0173674588665	0.995311936531	0.00468806346917	56.5789473684	1	2.42105263158	0.0114035087719
58394	fawn	0.980988593156	0.0190114068441	0.995260663507	0.00473933649289	103.2	2	2.8	0.0133333333333
58394	a kind of deer, hind	0.980988593156	0.0190114068441	0.995260663507	0.00473933649289	103.2	2	2.8	0.0133333333333
58394	probably fallow deer	0.980988593156	0.0190114068441	0.995260663507	0.00473933649289	103.2	2	2.8	0.0133333333333
58394	hind-calf	0.980988593156	0.0190114068441	0.995260663507	0.00473933649289	103.2	2	2.8	0.0133333333333
55573	flock of cattle	0.981919332406	0.0180806675939	0.995238095238	0.0047619047619	54.3076923077	1	1.69230769231	0.0080971659919
55573	fee	0.981919332406	0.0180806675939	0.995238095238	0.0047619047619	54.3076923077	1	1.69230769231	0.0080971659919
55573	y. sheep or goat	0.981919332406	0.0180806675939	0.995238095238	0.0047619047619	54.3076923077	1	1.69230769231	0.0080971659919
55573	to enjoy	0.981919332406	0.0180806675939	0.995238095238	0.0047619047619	54.3076923077	1	1.69230769231	0.0080971659919
55573	profit	0.981919332406	0.0180806675939	0.995238095238	0.0047619047619	54.3076923077	1	1.69230769231	0.0080971659919
55573	money	0.981919332406	0.0180806675939	0.995238095238	0.0047619047619	54.3076923077	1	1.69230769231	0.0080971659919
55573	domestic animal	0.981919332406	0.0180806675939	0.995238095238	0.0047619047619	54.3076923077	1	1.69230769231	0.0080971659919
55573	flock	0.981919332406	0.0180806675939	0.995238095238	0.0047619047619	54.3076923077	1	1.69230769231	0.0080971659919
55573	herd	0.981919332406	0.0180806675939	0.995238095238	0.0047619047619	54.3076923077	1	1.69230769231	0.0080971659919
55573	bovine (esp. for meat)	0.981919332406	0.0180806675939	0.995238095238	0.0047619047619	54.3076923077	1	1.69230769231	0.0080971659919
70251	food	0.240776699029	0.759223300971	0.995215311005	0.00478468899522	5.39130434783	17	9.60869565217	0.0461956521739
71919	to stretch	0.837209302326	0.162790697674	0.995215311005	0.00478468899522	10.2857142857	2	3.71428571429	0.0178571428571
71919	to extend	0.837209302326	0.162790697674	0.995215311005	0.00478468899522	10.2857142857	2	3.71428571429	0.0178571428571
85892	boulder	0.972972972973	0.027027027027	0.995215311005	0.00478468899522	36.0	1	2.0	0.00961538461538
85892	sanctuary	0.972972972973	0.027027027027	0.995215311005	0.00478468899522	36.0	1	2.0	0.00961538461538
85892	pile of rocks	0.972972972973	0.027027027027	0.995215311005	0.00478468899522	36.0	1	2.0	0.00961538461538
85892	hard	0.972972972973	0.027027027027	0.995215311005	0.00478468899522	36.0	1	2.0	0.00961538461538
85892	rocky eminence	0.972972972973	0.027027027027	0.995215311005	0.00478468899522	36.0	1	2.0	0.00961538461538
85892	stony ground	0.972972972973	0.027027027027	0.995215311005	0.00478468899522	36.0	1	2.0	0.00961538461538
85892	precipice	0.972972972973	0.027027027027	0.995215311005	0.00478468899522	36.0	1	2.0	0.00961538461538
85892	rocky hill	0.972972972973	0.027027027027	0.995215311005	0.00478468899522	36.0	1	2.0	0.00961538461538
85892	pagan temple	0.972972972973	0.027027027027	0.995215311005	0.00478468899522	36.0	1	2.0	0.00961538461538
85892	idol	0.972972972973	0.027027027027	0.995215311005	0.00478468899522	36.0	1	2.0	0.00961538461538
85892	firm	0.972972972973	0.027027027027	0.995215311005	0.00478468899522	36.0	1	2.0	0.00961538461538
85892	rocky outcrop	0.972972972973	0.027027027027	0.995215311005	0.00478468899522	36.0	1	2.0	0.00961538461538
85892	steep or rugged rock	0.972972972973	0.027027027027	0.995215311005	0.00478468899522	36.0	1	2.0	0.00961538461538
85892	grove	0.972972972973	0.027027027027	0.995215311005	0.00478468899522	36.0	1	2.0	0.00961538461538
85892	tor	0.972972972973	0.027027027027	0.995215311005	0.00478468899522	36.0	1	2.0	0.00961538461538
85892	place of sacrifice	0.972972972973	0.027027027027	0.995215311005	0.00478468899522	36.0	1	2.0	0.00961538461538
85892	rocky shore	0.972972972973	0.027027027027	0.995215311005	0.00478468899522	36.0	1	2.0	0.00961538461538
68211	fur coat	0.96380952381	0.0361904761905	0.995208256543	0.00479174345743	53.2631578947	2	4.73684210526	0.0228070175439
68211	animal skin	0.96380952381	0.0361904761905	0.995208256543	0.00479174345743	53.2631578947	2	4.73684210526	0.0228070175439
68211	fur cloak	0.96380952381	0.0361904761905	0.995208256543	0.00479174345743	53.2631578947	2	4.73684210526	0.0228070175439
68211	leather garment	0.965296803653	0.034703196347	0.995208256543	0.00479174345743	55.6315789474	2	2.36842105263	0.0114035087719
68324	body hair	0.840816326531	0.159183673469	0.995192307692	0.00480769230769	15.8461538462	3	4.15384615385	0.0200668896321
80982	wooden mortar	0.840816326531	0.159183673469	0.995192307692	0.00480769230769	15.8461538462	3	4.15384615385	0.0200668896321
58394	fallow deer	0.971114962449	0.0288850375505	0.995192307692	0.00480769230769	100.86	3	4.14	0.02
58394	hind	0.971114962449	0.0288850375505	0.995192307692	0.00480769230769	100.86	3	4.14	0.02
83575	wire of any metal	0.985153256705	0.014846743295	0.995192307692	0.00480769230769	66.3548387097	1	1.64516129032	0.00794763908368
83575	wire	0.985153256705	0.014846743295	0.995192307692	0.00480769230769	66.3548387097	1	1.64516129032	0.00794763908368
83575	metal wire	0.985153256705	0.014846743295	0.995192307692	0.00480769230769	66.3548387097	1	1.64516129032	0.00794763908368
83575	pot	0.985153256705	0.014846743295	0.995192307692	0.00480769230769	66.3548387097	1	1.64516129032	0.00794763908368
83575	prepared copper or bronze	0.985153256705	0.014846743295	0.995192307692	0.00480769230769	66.3548387097	1	1.64516129032	0.00794763908368
83575	brass wire	0.985153256705	0.014846743295	0.995192307692	0.00480769230769	66.3548387097	1	1.64516129032	0.00794763908368
83575	coin	0.985153256705	0.014846743295	0.995192307692	0.00480769230769	66.3548387097	1	1.64516129032	0.00794763908368
80719	spinning ring	0.960880195599	0.039119804401	0.995192307692	0.00480769230769	24.5625	1	1.4375	0.00694444444444
80719	distaff	0.960880195599	0.039119804401	0.995192307692	0.00480769230769	24.5625	1	1.4375	0.00694444444444
80719	pole	0.960880195599	0.039119804401	0.995192307692	0.00480769230769	24.5625	1	1.4375	0.00694444444444
80719	Belt of Orion (constellation)	0.960880195599	0.039119804401	0.995192307692	0.00480769230769	24.5625	1	1.4375	0.00694444444444
80719	circle	0.960880195599	0.039119804401	0.995192307692	0.00480769230769	24.5625	1	1.4375	0.00694444444444
68354	casing	0.619047619048	0.380952380952	0.99518459069	0.00481540930979	13.0	8	10.0	0.0483870967742
55573	livestock	0.962750716332	0.0372492836676	0.995127892814	0.00487210718636	51.6923076923	2	3.30769230769	0.0161943319838
55573	property	0.962750716332	0.0372492836676	0.995127892814	0.00487210718636	51.6923076923	2	3.30769230769	0.0161943319838
55573	animal	0.962750716332	0.0372492836676	0.995127892814	0.00487210718636	51.6923076923	2	3.30769230769	0.0161943319838
55573	ox	0.962750716332	0.0372492836676	0.995127892814	0.00487210718636	51.6923076923	2	3.30769230769	0.0161943319838
55573	to use	0.962750716332	0.0372492836676	0.995127892814	0.00487210718636	51.6923076923	2	3.30769230769	0.0161943319838
57679	land	0.979805534779	0.0201944652206	0.99512195122	0.00487804878049	48.5185185185	1	1.48148148148	0.00726216412491
57679	unit of land measurement	0.979805534779	0.0201944652206	0.99512195122	0.00487804878049	48.5185185185	1	1.48148148148	0.00726216412491
57679	plowed field	0.979805534779	0.0201944652206	0.99512195122	0.00487804878049	48.5185185185	1	1.48148148148	0.00726216412491
57679	crop	0.979805534779	0.0201944652206	0.99512195122	0.00487804878049	48.5185185185	1	1.48148148148	0.00726216412491
57679	outside	0.979805534779	0.0201944652206	0.99512195122	0.00487804878049	48.5185185185	1	1.48148148148	0.00726216412491
57679	wild	0.979805534779	0.0201944652206	0.99512195122	0.00487804878049	48.5185185185	1	1.48148148148	0.00726216412491
57679	w. sheep	0.979805534779	0.0201944652206	0.99512195122	0.00487804878049	48.5185185185	1	1.48148148148	0.00726216412491
83575	money	0.969592937715	0.0304070622854	0.995096625324	0.00490337467551	63.7741935484	2	3.22580645161	0.0158952781674
83575	made of bronze	0.969592937715	0.0304070622854	0.995096625324	0.00490337467551	63.7741935484	2	3.22580645161	0.0158952781674
85892	crag	0.943060498221	0.0569395017794	0.995061728395	0.00493827160494	33.125	2	3.875	0.0192307692308
85892	reef	0.943060498221	0.0569395017794	0.995061728395	0.00493827160494	33.125	2	3.875	0.0192307692308
85892	cliff	0.943060498221	0.0569395017794	0.995061728395	0.00493827160494	33.125	2	3.875	0.0192307692308
72491	field	0.906976744186	0.093023255814	0.995053371518	0.00494662848217	117.0	12	18.0	0.0894819466248
58394	elk	0.95064165844	0.0493583415597	0.99504950495	0.0049504950495	96.3	5	6.7	0.0333333333333
58394	stag-beetle	0.95064165844	0.0493583415597	0.99504950495	0.0049504950495	96.3	5	6.7	0.0333333333333
59114	sow	0.694706116492	0.305293883508	0.995043370508	0.00495662949195	88.7457627119	39	48.2542372881	0.240369799692
55567	animal	0.588235294118	0.411764705882	0.995024875622	0.00497512437811	10.0	7	8.0	0.04
55573	fool	0.942477876106	0.0575221238938	0.995012468828	0.00498753117207	49.1538461538	3	4.84615384615	0.0242914979757
55573	cow	0.942477876106	0.0575221238938	0.995012468828	0.00498753117207	49.1538461538	3	4.84615384615	0.0242914979757
57679	cornfield	0.958429561201	0.0415704387991	0.994997498749	0.00500250125063	46.1111111111	2	2.88888888889	0.0145243282498
57679	domain	0.959641255605	0.0403587443946	0.994997498749	0.00500250125063	47.5555555556	2	1.44444444444	0.00726216412491
57679	countryside	0.959641255605	0.0403587443946	0.994997498749	0.00500250125063	47.5555555556	2	1.44444444444	0.00726216412491
57679	area	0.959641255605	0.0403587443946	0.994997498749	0.00500250125063	47.5555555556	2	1.44444444444	0.00726216412491
57679	level plain	0.959641255605	0.0403587443946	0.994997498749	0.00500250125063	47.5555555556	2	1.44444444444	0.00726216412491
57679	territory	0.959641255605	0.0403587443946	0.994997498749	0.00500250125063	47.5555555556	2	1.44444444444	0.00726216412491
83575	brazen	0.953313253012	0.046686746988	0.994997057092	0.00500294290759	61.2580645161	3	4.74193548387	0.0238429172511
55066	roebuck	0.99137015401	0.00862984599044	0.994990680336	0.00500931966449	114.876923077	1	1.12307692308	0.00565417488494
55066	wolverine (?)	0.99137015401	0.00862984599044	0.994990680336	0.00500931966449	114.876923077	1	1.12307692308	0.00565417488494
55066	m. deer, esp. red deer	0.99137015401	0.00862984599044	0.994990680336	0.00500931966449	114.876923077	1	1.12307692308	0.00565417488494
55066	nail	0.99137015401	0.00862984599044	0.994990680336	0.00500931966449	114.876923077	1	1.12307692308	0.00565417488494
55066	made of horn	0.99137015401	0.00862984599044	0.994990680336	0.00500931966449	114.876923077	1	1.12307692308	0.00565417488494
55066	a red deer	0.99137015401	0.00862984599044	0.994990680336	0.00500931966449	114.876923077	1	1.12307692308	0.00565417488494
55066	horn(s), antlers	0.99137015401	0.00862984599044	0.994990680336	0.00500931966449	114.876923077	1	1.12307692308	0.00565417488494
55066	elk	0.99137015401	0.00862984599044	0.994990680336	0.00500931966449	114.876923077	1	1.12307692308	0.00565417488494
55066	m. roe deer	0.99137015401	0.00862984599044	0.994990680336	0.00500931966449	114.876923077	1	1.12307692308	0.00565417488494
55066	horned	0.99137015401	0.00862984599044	0.994990680336	0.00500931966449	114.876923077	1	1.12307692308	0.00565417488494
55066	pertaining to deer	0.99137015401	0.00862984599044	0.994990680336	0.00500931966449	114.876923077	1	1.12307692308	0.00565417488494
55066	top	0.99137015401	0.00862984599044	0.994990680336	0.00500931966449	114.876923077	1	1.12307692308	0.00565417488494
55066	a stag	0.99137015401	0.00862984599044	0.994990680336	0.00500931966449	114.876923077	1	1.12307692308	0.00565417488494
55066	venison	0.99137015401	0.00862984599044	0.994990680336	0.00500931966449	114.876923077	1	1.12307692308	0.00565417488494
55066	head	0.99137015401	0.00862984599044	0.994990680336	0.00500931966449	114.876923077	1	1.12307692308	0.00565417488494
55066	foremost	0.99137015401	0.00862984599044	0.994990680336	0.00500931966449	114.876923077	1	1.12307692308	0.00565417488494
55066	fem. deer	0.99137015401	0.00862984599044	0.994990680336	0.00500931966449	114.876923077	1	1.12307692308	0.00565417488494
55066	buck	0.99137015401	0.00862984599044	0.994990680336	0.00500931966449	114.876923077	1	1.12307692308	0.00565417488494
55066	the m. of the (red) deer	0.99137015401	0.00862984599044	0.994990680336	0.00500931966449	114.876923077	1	1.12307692308	0.00565417488494
55066	chief	0.99137015401	0.00862984599044	0.994990680336	0.00500931966449	114.876923077	1	1.12307692308	0.00565417488494
55066	stag, m. deer	0.99137015401	0.00862984599044	0.994990680336	0.00500931966449	114.876923077	1	1.12307692308	0.00565417488494
55066	chamois	0.99137015401	0.00862984599044	0.994990680336	0.00500931966449	114.876923077	1	1.12307692308	0.00565417488494
68211	pelt	0.921487603306	0.0785123966942	0.994986502121	0.0050134978789	46.9473684211	4	9.05263157895	0.0456140350877
61223	bitch	0.5	0.5	0.994974874372	0.00502512562814	6.0	6	6.0	0.030303030303
69907	beer	0.548387096774	0.451612903226	0.994974874372	0.00502512562814	7.28571428571	6	4.71428571429	0.0238095238095
80719	chariot handle	0.917525773196	0.0824742268041	0.994974874372	0.00502512562814	22.25	2	2.75	0.0138888888889
80719	shaft	0.917525773196	0.0824742268041	0.994974874372	0.00502512562814	22.25	2	2.75	0.0138888888889
80719	to turn	0.917525773196	0.0824742268041	0.994974874372	0.00502512562814	22.25	2	2.75	0.0138888888889
68354	fodder	0.556923076923	0.443076923077	0.994932432432	0.00506756756757	11.3125	9	10.6875	0.054435483871
55066	horn	0.98257606219	0.0174239378099	0.994921459785	0.00507854021495	112.784615385	2	2.21538461538	0.0113083497699
55066	fem. roe deer	0.98257606219	0.0174239378099	0.994921459785	0.00507854021495	112.784615385	2	2.21538461538	0.0113083497699
83575	metal	0.936312275295	0.0636877247047	0.99489336137	0.00510663863022	58.8064516129	4	6.1935483871	0.0317905563347
85815	lapidate	0.958620689655	0.0413793103448	0.994782608696	0.00521739130435	23.1666666667	1	1.83333333333	0.00961538461538
85815	boulder	0.958620689655	0.0413793103448	0.994782608696	0.00521739130435	23.1666666667	1	1.83333333333	0.00961538461538
85815	large piece of stone used for building, such as a pole or a lintel	0.958620689655	0.0413793103448	0.994782608696	0.00521739130435	23.1666666667	1	1.83333333333	0.00961538461538
85815	to stone	0.958620689655	0.0413793103448	0.994782608696	0.00521739130435	23.1666666667	1	1.83333333333	0.00961538461538
85815	pole	0.958620689655	0.0413793103448	0.994782608696	0.00521739130435	23.1666666667	1	1.83333333333	0.00961538461538
85815	millstone	0.958620689655	0.0413793103448	0.994782608696	0.00521739130435	23.1666666667	1	1.83333333333	0.00961538461538
85815	rock slip	0.958620689655	0.0413793103448	0.994782608696	0.00521739130435	23.1666666667	1	1.83333333333	0.00961538461538
85815	fall	0.958620689655	0.0413793103448	0.994782608696	0.00521739130435	23.1666666667	1	1.83333333333	0.00961538461538
85815	tomb	0.958620689655	0.0413793103448	0.994782608696	0.00521739130435	23.1666666667	1	1.83333333333	0.00961538461538
85815	falling down	0.958620689655	0.0413793103448	0.994782608696	0.00521739130435	23.1666666667	1	1.83333333333	0.00961538461538
85815	standing stone	0.958620689655	0.0413793103448	0.994782608696	0.00521739130435	23.1666666667	1	1.83333333333	0.00961538461538
85815	?	0.958620689655	0.0413793103448	0.994782608696	0.00521739130435	23.1666666667	1	1.83333333333	0.00961538461538
85815	flat stone used for roofing houses	0.958620689655	0.0413793103448	0.994782608696	0.00521739130435	23.1666666667	1	1.83333333333	0.00961538461538
85377	(dial.) forest	0.959390862944	0.0406091370558	0.994782608696	0.00521739130435	23.625	1	1.375	0.00721153846154
85377	swamp	0.959390862944	0.0406091370558	0.994782608696	0.00521739130435	23.625	1	1.375	0.00721153846154
85377	tree	0.959390862944	0.0406091370558	0.994782608696	0.00521739130435	23.625	1	1.375	0.00721153846154
85377	forest on mountain	0.959390862944	0.0406091370558	0.994782608696	0.00521739130435	23.625	1	1.375	0.00721153846154
85377	wood	0.959390862944	0.0406091370558	0.994782608696	0.00521739130435	23.625	1	1.375	0.00721153846154
85377	marsh	0.959390862944	0.0406091370558	0.994782608696	0.00521739130435	23.625	1	1.375	0.00721153846154
85377	rock	0.959390862944	0.0406091370558	0.994782608696	0.00521739130435	23.625	1	1.375	0.00721153846154
85377	hill	0.959390862944	0.0406091370558	0.994782608696	0.00521739130435	23.625	1	1.375	0.00721153846154
65244	evil person	0.949685534591	0.0503144654088	0.994736842105	0.00526315789474	18.875	1	1.125	0.00595238095238
65244	(poisonous) snake	0.949685534591	0.0503144654088	0.994736842105	0.00526315789474	18.875	1	1.125	0.00595238095238
65244	poisonous snake	0.949685534591	0.0503144654088	0.994736842105	0.00526315789474	18.875	1	1.125	0.00595238095238
65244	dragon	0.949685534591	0.0503144654088	0.994736842105	0.00526315789474	18.875	1	1.125	0.00595238095238
65244	wyvern (mythical serpent)	0.949685534591	0.0503144654088	0.994736842105	0.00526315789474	18.875	1	1.125	0.00595238095238
83575	iron	0.900161030596	0.0998389694042	0.994672516453	0.00532748354748	54.0967741935	6	8.90322580645	0.0476858345021
83575	brass	0.900161030596	0.0998389694042	0.994672516453	0.00532748354748	54.0967741935	6	8.90322580645	0.0476858345021
58394	doe	0.89539748954	0.10460251046	0.994652406417	0.00534759358289	85.6	10	12.4	0.0666666666667
55066	red deer	0.945810754481	0.054189245519	0.994624328041	0.00537567195899	104.723076923	6	6.27692307692	0.0339250493097
88083	ray	0.567415730337	0.432584269663	0.994587280108	0.00541271989175	14.4285714286	11	23.5714285714	0.128279883382
88083	beam	0.567415730337	0.432584269663	0.994587280108	0.00541271989175	14.4285714286	11	23.5714285714	0.128279883382
83575	ore	0.881030701754	0.118969298246	0.994554772582	0.00544522741832	51.8387096774	7	10.1612903226	0.0556334735858
85815	flat stone	0.911111111111	0.0888888888889	0.994535519126	0.00546448087432	20.5	2	3.5	0.0192307692308
85815	slate	0.911111111111	0.0888888888889	0.994535519126	0.00546448087432	20.5	2	3.5	0.0192307692308
59431	piglet	0.710182767624	0.289817232376	0.994475138122	0.00552486187845	44.1081081081	18	21.8918918919	0.121621621622
67947	hairy	0.222222222222	0.777777777778	0.994475138122	0.00552486187845	2.0	7	15.0	0.0833333333333
68211	hide	0.832229580574	0.167770419426	0.994475138122	0.00552486187845	39.6842105263	8	12.3157894737	0.0684210526316
55066	m. deer	0.926522537799	0.0734774622015	0.994462330972	0.00553766902769	100.876923077	8	8.12307692308	0.0452333990796
55066	roe deer	0.926522537799	0.0734774622015	0.994462330972	0.00553766902769	100.876923077	8	8.12307692308	0.0452333990796
54485	to bear	0.968063872255	0.0319361277445	0.994419642857	0.00558035714286	30.3125	1	1.6875	0.0094696969697
54485	(y.) bull	0.968063872255	0.0319361277445	0.994419642857	0.00558035714286	30.3125	1	1.6875	0.0094696969697
54485	without calf	0.968063872255	0.0319361277445	0.994419642857	0.00558035714286	30.3125	1	1.6875	0.0094696969697
54485	pig	0.968063872255	0.0319361277445	0.994419642857	0.00558035714286	30.3125	1	1.6875	0.0094696969697
54485	ox	0.968063872255	0.0319361277445	0.994419642857	0.00558035714286	30.3125	1	1.6875	0.0094696969697
57920	lamb	0.985675306958	0.0143246930423	0.994397759104	0.00560224089636	68.8095238095	1	1.19047619048	0.00670690811536
57920	beef	0.985675306958	0.0143246930423	0.994397759104	0.00560224089636	68.8095238095	1	1.19047619048	0.00670690811536
57920	meat of calf	0.985675306958	0.0143246930423	0.994397759104	0.00560224089636	68.8095238095	1	1.19047619048	0.00670690811536
57920	yearling	0.985675306958	0.0143246930423	0.994397759104	0.00560224089636	68.8095238095	1	1.19047619048	0.00670690811536
57920	y. animal	0.985675306958	0.0143246930423	0.994397759104	0.00560224089636	68.8095238095	1	1.19047619048	0.00670690811536
57920	calf meat	0.985675306958	0.0143246930423	0.994397759104	0.00560224089636	68.8095238095	1	1.19047619048	0.00670690811536
57920	pig	0.985675306958	0.0143246930423	0.994397759104	0.00560224089636	68.8095238095	1	1.19047619048	0.00670690811536
57920	calf under one year of age	0.985675306958	0.0143246930423	0.994397759104	0.00560224089636	68.8095238095	1	1.19047619048	0.00670690811536
57920	one-year-old she-goat	0.985675306958	0.0143246930423	0.994397759104	0.00560224089636	68.8095238095	1	1.19047619048	0.00670690811536
57920	Aries (constellation)	0.985675306958	0.0143246930423	0.994397759104	0.00560224089636	68.8095238095	1	1.19047619048	0.00670690811536
57920	breeding sow	0.985675306958	0.0143246930423	0.994397759104	0.00560224089636	68.8095238095	1	1.19047619048	0.00670690811536
57920	fem. (of y. pigs)	0.985675306958	0.0143246930423	0.994397759104	0.00560224089636	68.8095238095	1	1.19047619048	0.00670690811536
57920	one-year-old calf	0.985675306958	0.0143246930423	0.994397759104	0.00560224089636	68.8095238095	1	1.19047619048	0.00670690811536
57920	y. ram	0.985675306958	0.0143246930423	0.994397759104	0.00560224089636	68.8095238095	1	1.19047619048	0.00670690811536
55066	cow	0.916666666667	0.0833333333333	0.994377615063	0.00562238493724	99.0	9	9.0	0.0508875739645
55573	beast	0.824620573356	0.175379426644	0.994342291372	0.00565770862801	37.6153846154	8	11.3846153846	0.0647773279352
57920	battering ram	0.970873786408	0.0291262135922	0.994284081166	0.00571591883395	66.6666666667	2	2.33333333333	0.0134138162307
85815	flagstone	0.857142857143	0.142857142857	0.994263862333	0.0057361376673	18.0	3	5.0	0.0288461538462
85815	lava	0.857142857143	0.142857142857	0.994263862333	0.0057361376673	18.0	3	5.0	0.0288461538462
54485	y. pig	0.932773109244	0.0672268907563	0.994206257242	0.00579374275782	27.75	2	3.25	0.0189393939394
54485	y. cow	0.932773109244	0.0672268907563	0.994206257242	0.00579374275782	27.75	2	3.25	0.0189393939394
55066	stag	0.896556712963	0.103443287037	0.994200161856	0.00579983814405	95.3384615385	11	10.6615384615	0.0621959237344
68211	skin (person's)	0.774881516588	0.225118483412	0.994178235558	0.00582176444245	34.4210526316	10	15.5789473684	0.0912280701754
57920	year	0.955602536998	0.0443974630021	0.994165694282	0.00583430571762	64.5714285714	3	3.42857142857	0.0201207243461
86220	skin (person's)	0.988033139	0.0119668610003	0.994152046784	0.00584795321637	82.5641025641	1	1.4358974359	0.00844645550528
86220	leathery	0.988033139	0.0119668610003	0.994152046784	0.00584795321637	82.5641025641	1	1.4358974359	0.00844645550528
86220	scales	0.988033139	0.0119668610003	0.994152046784	0.00584795321637	82.5641025641	1	1.4358974359	0.00844645550528
86220	leathern	0.988033139	0.0119668610003	0.994152046784	0.00584795321637	82.5641025641	1	1.4358974359	0.00844645550528
86220	sole of the foot	0.988033139	0.0119668610003	0.994152046784	0.00584795321637	82.5641025641	1	1.4358974359	0.00844645550528
86220	skin (of a alive animal)	0.988033139	0.0119668610003	0.994152046784	0.00584795321637	82.5641025641	1	1.4358974359	0.00844645550528
86220	band for swathing children	0.988033139	0.0119668610003	0.994152046784	0.00584795321637	82.5641025641	1	1.4358974359	0.00844645550528
86220	skin (animal and human)	0.988033139	0.0119668610003	0.994152046784	0.00584795321637	82.5641025641	1	1.4358974359	0.00844645550528
86220	headscarf	0.988033139	0.0119668610003	0.994152046784	0.00584795321637	82.5641025641	1	1.4358974359	0.00844645550528
86220	animal skin with fur	0.988033139	0.0119668610003	0.994152046784	0.00584795321637	82.5641025641	1	1.4358974359	0.00844645550528
86220	leprosy	0.988033139	0.0119668610003	0.994152046784	0.00584795321637	82.5641025641	1	1.4358974359	0.00844645550528
79218	to pluck	0.98021978022	0.0197802197802	0.994117647059	0.00588235294118	49.5555555556	1	1.44444444444	0.00854700854701
79218	battle axe	0.98021978022	0.0197802197802	0.994117647059	0.00588235294118	49.5555555556	1	1.44444444444	0.00854700854701
79218	strip	0.98021978022	0.0197802197802	0.994117647059	0.00588235294118	49.5555555556	1	1.44444444444	0.00854700854701
79218	long knife	0.98021978022	0.0197802197802	0.994117647059	0.00588235294118	49.5555555556	1	1.44444444444	0.00854700854701
79218	iron tool	0.98021978022	0.0197802197802	0.994117647059	0.00588235294118	49.5555555556	1	1.44444444444	0.00854700854701
79218	ice chisel	0.98021978022	0.0197802197802	0.994117647059	0.00588235294118	49.5555555556	1	1.44444444444	0.00854700854701
79218	to cut	0.98021978022	0.0197802197802	0.994117647059	0.00588235294118	49.5555555556	1	1.44444444444	0.00854700854701
79218	sword	0.98021978022	0.0197802197802	0.994117647059	0.00588235294118	49.5555555556	1	1.44444444444	0.00854700854701
79218	strike	0.98021978022	0.0197802197802	0.994117647059	0.00588235294118	49.5555555556	1	1.44444444444	0.00854700854701
79218	to lift	0.98021978022	0.0197802197802	0.994117647059	0.00588235294118	49.5555555556	1	1.44444444444	0.00854700854701
79218	stonecutter's tool	0.98021978022	0.0197802197802	0.994117647059	0.00588235294118	49.5555555556	1	1.44444444444	0.00854700854701
79218	halberd	0.98021978022	0.0197802197802	0.994117647059	0.00588235294118	49.5555555556	1	1.44444444444	0.00854700854701
79218	plowshare	0.98021978022	0.0197802197802	0.994117647059	0.00588235294118	49.5555555556	1	1.44444444444	0.00854700854701
79218	to digging implement	0.98021978022	0.0197802197802	0.994117647059	0.00588235294118	49.5555555556	1	1.44444444444	0.00854700854701
79218	wood axe with short handle and broad blade	0.98021978022	0.0197802197802	0.994117647059	0.00588235294118	49.5555555556	1	1.44444444444	0.00854700854701
79218	battle axe (obsolete)	0.98021978022	0.0197802197802	0.994117647059	0.00588235294118	49.5555555556	1	1.44444444444	0.00854700854701
79218	I to cut	0.98021978022	0.0197802197802	0.994117647059	0.00588235294118	49.5555555556	1	1.44444444444	0.00854700854701
79218	hatchet	0.98021978022	0.0197802197802	0.994117647059	0.00588235294118	49.5555555556	1	1.44444444444	0.00854700854701
79218	pickaxe	0.98021978022	0.0197802197802	0.994117647059	0.00588235294118	49.5555555556	1	1.44444444444	0.00854700854701
79218	billhook	0.98021978022	0.0197802197802	0.994117647059	0.00588235294118	49.5555555556	1	1.44444444444	0.00854700854701
79218	arrow	0.98021978022	0.0197802197802	0.994117647059	0.00588235294118	49.5555555556	1	1.44444444444	0.00854700854701
79218	broad-bladed axe	0.98021978022	0.0197802197802	0.994117647059	0.00588235294118	49.5555555556	1	1.44444444444	0.00854700854701
79218	crowbar	0.98021978022	0.0197802197802	0.994117647059	0.00588235294118	49.5555555556	1	1.44444444444	0.00854700854701
93629	awl	0.285714285714	0.714285714286	0.994082840237	0.00591715976331	5.6	14	8.4	0.05
56748	s. and inferior kind of horse bred and used chiefly in Ireland and Scotland	0.92	0.08	0.994082840237	0.00591715976331	11.5	1	1.5	0.00892857142857
56748	s. and inferior kind of horse	0.92	0.08	0.994082840237	0.00591715976331	11.5	1	1.5	0.00892857142857
56748	stallion	0.92	0.08	0.994082840237	0.00591715976331	11.5	1	1.5	0.00892857142857
56748	l. donkey stallion	0.92	0.08	0.994082840237	0.00591715976331	11.5	1	1.5	0.00892857142857
56748	s. horse	0.92	0.08	0.994082840237	0.00591715976331	11.5	1	1.5	0.00892857142857
92826	fluid remains of boiling	0.921875	0.078125	0.994082840237	0.00591715976331	11.8	1	1.2	0.00714285714286
92826	cheese whey	0.921875	0.078125	0.994082840237	0.00591715976331	11.8	1	1.2	0.00714285714286
92826	remains of whey	0.921875	0.078125	0.994082840237	0.00591715976331	11.8	1	1.2	0.00714285714286
92826	whey of curd	0.921875	0.078125	0.994082840237	0.00591715976331	11.8	1	1.2	0.00714285714286
92826	butter (melted)	0.921875	0.078125	0.994082840237	0.00591715976331	11.8	1	1.2	0.00714285714286
92826	curd	0.921875	0.078125	0.994082840237	0.00591715976331	11.8	1	1.2	0.00714285714286
86220	fleece	0.975663026521	0.0243369734789	0.994046353391	0.00595364660855	80.1794871795	2	2.82051282051	0.0168929110106
86220	pelt	0.975663026521	0.0243369734789	0.994046353391	0.00595364660855	80.1794871795	2	2.82051282051	0.0168929110106
86220	fur	0.975663026521	0.0243369734789	0.994046353391	0.00595364660855	80.1794871795	2	2.82051282051	0.0168929110106
57920	(y.) sow	0.93987115247	0.0601288475304	0.994042299672	0.00595770032767	62.5238095238	4	4.47619047619	0.0268276324614
54485	(of cow) without calf	0.894039735099	0.105960264901	0.993975903614	0.00602409638554	25.3125	3	4.6875	0.0284090909091
79218	various forms of bladed weapon	0.959337349398	0.0406626506024	0.993963782696	0.00603621730382	47.1851851852	2	2.81481481481	0.017094017094
79218	sharp tool	0.959337349398	0.0406626506024	0.993963782696	0.00603621730382	47.1851851852	2	2.81481481481	0.017094017094
79218	bill	0.96046852123	0.0395314787701	0.993963782696	0.00603621730382	48.5925925926	2	1.40740740741	0.00854700854701
86220	casing	0.962892483349	0.0371075166508	0.993936769164	0.00606323083586	77.8461538462	3	4.15384615385	0.0253393665158
86220	nappy	0.962892483349	0.0371075166508	0.993936769164	0.00606323083586	77.8461538462	3	4.15384615385	0.0253393665158
58394	elk, moose	0.79674796748	0.20325203252	0.993865030675	0.00613496932515	70.56	18	19.44	0.12
68211	skin	0.711392405063	0.288607594937	0.993847610033	0.00615238996687	29.5789473684	12	18.4210526316	0.114035087719
55573	bovine	0.741877256318	0.258122743682	0.993846153846	0.00615384615385	31.6153846154	11	14.3846153846	0.0890688259109
78162	vehicle	0.982713915298	0.0172860847018	0.993836671803	0.00616332819723	56.85	1	2.15	0.0133333333333
78162	vehicle (wheeled)	0.982713915298	0.0172860847018	0.993836671803	0.00616332819723	56.85	1	2.15	0.0133333333333
79218	knife	0.937354988399	0.0626450116009	0.993801652893	0.00619834710744	44.8888888889	3	4.11111111111	0.025641025641
58071	fem. deer	0.443548387097	0.556451612903	0.993788819876	0.00621118012422	11.9565217391	15	13.0434782609	0.0815217391304
71937	sow together	0.956611570248	0.0433884297521	0.993788819876	0.00621118012422	22.0476190476	1	0.952380952381	0.00595238095238
71937	fetter	0.956611570248	0.0433884297521	0.993788819876	0.00621118012422	22.0476190476	1	0.952380952381	0.00595238095238
71937	to weave	0.956611570248	0.0433884297521	0.993788819876	0.00621118012422	22.0476190476	1	0.952380952381	0.00595238095238
71937	spinning	0.956611570248	0.0433884297521	0.993788819876	0.00621118012422	22.0476190476	1	0.952380952381	0.00595238095238
71937	fetter (for tying the legs of an animal)	0.956611570248	0.0433884297521	0.993788819876	0.00621118012422	22.0476190476	1	0.952380952381	0.00595238095238
57920	buck	0.907079646018	0.0929203539823	0.993779160187	0.00622083981337	58.5714285714	6	6.42857142857	0.0402414486922
54485	to give birth	0.851851851852	0.148148148148	0.993726474279	0.00627352572146	23.0	4	6.0	0.0378787878788
74461	harvested seeds	0.994430574227	0.005569425773	0.993725490196	0.00627450980392	178.551724138	1	1.44827586207	0.00914459897123
74461	small fruit such as grapes or peppercorns	0.994430574227	0.005569425773	0.993725490196	0.00627450980392	178.551724138	1	1.44827586207	0.00914459897123
74461	speck	0.994430574227	0.005569425773	0.993725490196	0.00627450980392	178.551724138	1	1.44827586207	0.00914459897123
74461	to age	0.994430574227	0.005569425773	0.993725490196	0.00627450980392	178.551724138	1	1.44827586207	0.00914459897123
74461	a seed esp. the seed contained within any fruit	0.994430574227	0.005569425773	0.993725490196	0.00627450980392	178.551724138	1	1.44827586207	0.00914459897123
74461	maize	0.994430574227	0.005569425773	0.993725490196	0.00627450980392	178.551724138	1	1.44827586207	0.00914459897123
74461	(fruit of) cereal esp. the chief crop of a region	0.994430574227	0.005569425773	0.993725490196	0.00627450980392	178.551724138	1	1.44827586207	0.00914459897123
74461	barley	0.994430574227	0.005569425773	0.993725490196	0.00627450980392	178.551724138	1	1.44827586207	0.00914459897123
74461	a grain	0.994430574227	0.005569425773	0.993725490196	0.00627450980392	178.551724138	1	1.44827586207	0.00914459897123
74461	small quantity (of something)	0.994430574227	0.005569425773	0.993725490196	0.00627450980392	178.551724138	1	1.44827586207	0.00914459897123
74461	lump	0.994430574227	0.005569425773	0.993725490196	0.00627450980392	178.551724138	1	1.44827586207	0.00914459897123
74461	bean	0.994430574227	0.005569425773	0.993725490196	0.00627450980392	178.551724138	1	1.44827586207	0.00914459897123
74461	pellet	0.994430574227	0.005569425773	0.993725490196	0.00627450980392	178.551724138	1	1.44827586207	0.00914459897123
74461	a seed	0.994430574227	0.005569425773	0.993725490196	0.00627450980392	178.551724138	1	1.44827586207	0.00914459897123
74461	wheat (grain and plant)	0.994430574227	0.005569425773	0.993725490196	0.00627450980392	178.551724138	1	1.44827586207	0.00914459897123
74461	berry	0.994430574227	0.005569425773	0.993725490196	0.00627450980392	178.551724138	1	1.44827586207	0.00914459897123
74461	etc)	0.994430574227	0.005569425773	0.993725490196	0.00627450980392	178.551724138	1	1.44827586207	0.00914459897123
74461	small seed	0.994430574227	0.005569425773	0.993725490196	0.00627450980392	178.551724138	1	1.44827586207	0.00914459897123
86220	bandage	0.936170212766	0.063829787234	0.993705035971	0.00629496402878	73.3333333333	5	6.66666666667	0.0422322775264
85272	building materials	0.975903614458	0.0240963855422	0.993697478992	0.0063025210084	40.5	1	1.5	0.00951374207188
85272	carpenter?s work	0.975903614458	0.0240963855422	0.993697478992	0.0063025210084	40.5	1	1.5	0.00951374207188
85272	the process of building	0.975903614458	0.0240963855422	0.993697478992	0.0063025210084	40.5	1	1.5	0.00951374207188
85272	room	0.975903614458	0.0240963855422	0.993697478992	0.0063025210084	40.5	1	1.5	0.00951374207188
85272	wood as building material(?)	0.975903614458	0.0240963855422	0.993697478992	0.0063025210084	40.5	1	1.5	0.00951374207188
85272	builder	0.975903614458	0.0240963855422	0.993697478992	0.0063025210084	40.5	1	1.5	0.00951374207188
85272	material	0.975903614458	0.0240963855422	0.993697478992	0.0063025210084	40.5	1	1.5	0.00951374207188
85272	wood esp. as building material	0.975903614458	0.0240963855422	0.993697478992	0.0063025210084	40.5	1	1.5	0.00951374207188
85272	structure esp. wood	0.975903614458	0.0240963855422	0.993697478992	0.0063025210084	40.5	1	1.5	0.00951374207188
85272	(strong) material	0.975903614458	0.0240963855422	0.993697478992	0.0063025210084	40.5	1	1.5	0.00951374207188
85272	material in general	0.975903614458	0.0240963855422	0.993697478992	0.0063025210084	40.5	1	1.5	0.00951374207188
85272	carpentry	0.975903614458	0.0240963855422	0.993697478992	0.0063025210084	40.5	1	1.5	0.00951374207188
74461	old man	0.98877274487	0.0112272551297	0.993650373702	0.00634962629804	176.137931034	2	2.86206896552	0.0182891979425
74461	grape	0.98877274487	0.0112272551297	0.993650373702	0.00634962629804	176.137931034	2	2.86206896552	0.0182891979425
74461	pea	0.98877274487	0.0112272551297	0.993650373702	0.00634962629804	176.137931034	2	2.86206896552	0.0182891979425
74461	to wear out	0.98877274487	0.0112272551297	0.993650373702	0.00634962629804	176.137931034	2	2.86206896552	0.0182891979425
74461	bead	0.98877274487	0.0112272551297	0.993650373702	0.00634962629804	176.137931034	2	2.86206896552	0.0182891979425
74461	(fruit of) cereal	0.98877274487	0.0112272551297	0.993650373702	0.00634962629804	176.137931034	2	2.86206896552	0.0182891979425
85377	forest	0.754601226994	0.245398773006	0.993630573248	0.00636942675159	15.375	5	5.625	0.0360576923077
86220	membrane	0.9222333001	0.0777666999003	0.993582397433	0.00641760256704	71.1538461538	6	7.84615384615	0.0506787330317
74461	rye	0.983027701912	0.0169722980882	0.993573436872	0.00642656312759	173.75862069	3	4.24137931034	0.0274337969137
56748	gelding	0.822222222222	0.177777777778	0.993548387097	0.00645161290323	9.25	2	2.75	0.0178571428571
56748	s. or inferior horse	0.822222222222	0.177777777778	0.993548387097	0.00645161290323	9.25	2	2.75	0.0178571428571
64881	reptile	0.984275184275	0.0157248157248	0.993546195652	0.00645380434783	62.59375	1	1.40625	0.00913461538462
64881	water-snake	0.984275184275	0.0157248157248	0.993546195652	0.00645380434783	62.59375	1	1.40625	0.00913461538462
64881	poisonous snake	0.984275184275	0.0157248157248	0.993546195652	0.00645380434783	62.59375	1	1.40625	0.00913461538462
64881	non-poisonous snake	0.984275184275	0.0157248157248	0.993546195652	0.00645380434783	62.59375	1	1.40625	0.00913461538462
64881	sea monster or sea-devil (probably fem.)	0.984275184275	0.0157248157248	0.993546195652	0.00645380434783	62.59375	1	1.40625	0.00913461538462
64881	lizard	0.984275184275	0.0157248157248	0.993546195652	0.00645380434783	62.59375	1	1.40625	0.00913461538462
64881	worm	0.984275184275	0.0157248157248	0.993546195652	0.00645380434783	62.59375	1	1.40625	0.00913461538462
64881	adder	0.984275184275	0.0157248157248	0.993546195652	0.00645380434783	62.59375	1	1.40625	0.00913461538462
64881	bladder worm	0.984275184275	0.0157248157248	0.993546195652	0.00645380434783	62.59375	1	1.40625	0.00913461538462
75763	s. clustered rural settlement	0.971370143149	0.0286298568507	0.993518518519	0.00648148148148	33.9285714286	1	2.07142857143	0.0135135135135
75763	to unite	0.971370143149	0.0286298568507	0.993518518519	0.00648148148148	33.9285714286	1	2.07142857143	0.0135135135135
75763	heap	0.971370143149	0.0286298568507	0.993518518519	0.00648148148148	33.9285714286	1	2.07142857143	0.0135135135135
75763	to collect	0.971370143149	0.0286298568507	0.993518518519	0.00648148148148	33.9285714286	1	2.07142857143	0.0135135135135
75763	bunch of grapes	0.971370143149	0.0286298568507	0.993518518519	0.00648148148148	33.9285714286	1	2.07142857143	0.0135135135135
75763	flock	0.971370143149	0.0286298568507	0.993518518519	0.00648148148148	33.9285714286	1	2.07142857143	0.0135135135135
75763	grape cluster	0.971370143149	0.0286298568507	0.993518518519	0.00648148148148	33.9285714286	1	2.07142857143	0.0135135135135
85272	building	0.950113378685	0.0498866213152	0.993501805054	0.00649819494585	38.0909090909	2	2.90909090909	0.0190274841438
85272	to build	0.950113378685	0.0498866213152	0.993501805054	0.00649819494585	38.0909090909	2	2.90909090909	0.0190274841438
85272	a building	0.950113378685	0.0498866213152	0.993501805054	0.00649819494585	38.0909090909	2	2.90909090909	0.0190274841438
85272	lumber	0.950113378685	0.0498866213152	0.993501805054	0.00649819494585	38.0909090909	2	2.90909090909	0.0190274841438
74461	(single) grain	0.977196776096	0.0228032239041	0.993494612726	0.00650538727384	171.413793103	4	5.58620689655	0.0365783958849
74461	wheat	0.977196776096	0.0228032239041	0.993494612726	0.00650538727384	171.413793103	4	5.58620689655	0.0365783958849
74461	small particle	0.977196776096	0.0228032239041	0.993494612726	0.00650538727384	171.413793103	4	5.58620689655	0.0365783958849
55866	alive	0.247311827957	0.752688172043	0.993464052288	0.00653594771242	3.28571428571	10	5.71428571429	0.0375939849624
71937	to braid	0.909871244635	0.0901287553648	0.993464052288	0.00653594771242	20.1904761905	2	1.80952380952	0.0119047619048
54485	y. bull	0.806295399516	0.193704600484	0.993455497382	0.0065445026178	20.8125	5	7.1875	0.0473484848485
64881	maggot	0.967871485944	0.0321285140562	0.99340048628	0.00659951372004	60.25	2	2.75	0.0182692307692
64881	dragon	0.967871485944	0.0321285140562	0.99340048628	0.00659951372004	60.25	2	2.75	0.0182692307692
64881	kind of black snake	0.967871485944	0.0321285140562	0.99340048628	0.00659951372004	60.25	2	2.75	0.0182692307692
83575	bronze	0.713140037014	0.286859962986	0.993385214008	0.00661478599222	37.2903225806	15	16.7096774194	0.111266947172
74461	old	0.965283320032	0.0347166799681	0.993331017714	0.00666898228552	166.827586207	6	8.1724137931	0.0548675938274
76222	table cloth	0.991130434783	0.00886956521739	0.993328795099	0.00667120490129	111.745098039	1	1.25490196078	0.00842793257654
76222	handkerchief	0.991130434783	0.00886956521739	0.993328795099	0.00667120490129	111.745098039	1	1.25490196078	0.00842793257654
76222	piece of linen cloth	0.991130434783	0.00886956521739	0.993328795099	0.00667120490129	111.745098039	1	1.25490196078	0.00842793257654
76222	flaxen	0.991130434783	0.00886956521739	0.993328795099	0.00667120490129	111.745098039	1	1.25490196078	0.00842793257654
76222	canvass	0.991130434783	0.00886956521739	0.993328795099	0.00667120490129	111.745098039	1	1.25490196078	0.00842793257654
76222	linen yarn	0.991130434783	0.00886956521739	0.993328795099	0.00667120490129	111.745098039	1	1.25490196078	0.00842793257654
76222	fishing net	0.991130434783	0.00886956521739	0.993328795099	0.00667120490129	111.745098039	1	1.25490196078	0.00842793257654
76222	flax (fibres)	0.991130434783	0.00886956521739	0.993328795099	0.00667120490129	111.745098039	1	1.25490196078	0.00842793257654
76222	sail	0.991130434783	0.00886956521739	0.993328795099	0.00667120490129	111.745098039	1	1.25490196078	0.00842793257654
76222	of canvass	0.991130434783	0.00886956521739	0.993328795099	0.00667120490129	111.745098039	1	1.25490196078	0.00842793257654
76222	cord	0.991130434783	0.00886956521739	0.993328795099	0.00667120490129	111.745098039	1	1.25490196078	0.00842793257654
76222	varieties of turnip	0.991130434783	0.00886956521739	0.993328795099	0.00667120490129	111.745098039	1	1.25490196078	0.00842793257654
76222	s. piece of linen cloth	0.991130434783	0.00886956521739	0.993328795099	0.00667120490129	111.745098039	1	1.25490196078	0.00842793257654
76222	line	0.991130434783	0.00886956521739	0.993328795099	0.00667120490129	111.745098039	1	1.25490196078	0.00842793257654
76222	neckerchief	0.991130434783	0.00886956521739	0.993328795099	0.00667120490129	111.745098039	1	1.25490196078	0.00842793257654
76222	towel	0.991130434783	0.00886956521739	0.993328795099	0.00667120490129	111.745098039	1	1.25490196078	0.00842793257654
76222	thread	0.991130434783	0.00886956521739	0.993328795099	0.00667120490129	111.745098039	1	1.25490196078	0.00842793257654
76222	made of linen	0.991130434783	0.00886956521739	0.993328795099	0.00667120490129	111.745098039	1	1.25490196078	0.00842793257654
76222	winding cloth (for wrapping a corpse)	0.991130434783	0.00886956521739	0.993328795099	0.00667120490129	111.745098039	1	1.25490196078	0.00842793257654
76222	awning	0.991130434783	0.00886956521739	0.993328795099	0.00667120490129	111.745098039	1	1.25490196078	0.00842793257654
76222	scarf	0.991130434783	0.00886956521739	0.993328795099	0.00667120490129	111.745098039	1	1.25490196078	0.00842793257654
55443	buck	0.960486322188	0.0395136778116	0.993311036789	0.0066889632107	24.3076923077	1	1.69230769231	0.011396011396
55443	horned animal	0.960486322188	0.0395136778116	0.993311036789	0.0066889632107	24.3076923077	1	1.69230769231	0.011396011396
55443	heifer	0.960486322188	0.0395136778116	0.993311036789	0.0066889632107	24.3076923077	1	1.69230769231	0.011396011396
55443	of Ceres (harvest goddess)	0.960486322188	0.0395136778116	0.993311036789	0.0066889632107	24.3076923077	1	1.69230769231	0.011396011396
55443	of cattle	0.960486322188	0.0395136778116	0.993311036789	0.0066889632107	24.3076923077	1	1.69230769231	0.011396011396
55443	ox	0.960486322188	0.0395136778116	0.993311036789	0.0066889632107	24.3076923077	1	1.69230769231	0.011396011396
55443	Aries (constellation)	0.960486322188	0.0395136778116	0.993311036789	0.0066889632107	24.3076923077	1	1.69230769231	0.011396011396
55443	y. ox	0.960486322188	0.0395136778116	0.993311036789	0.0066889632107	24.3076923077	1	1.69230769231	0.011396011396
55443	bovine (gen.)	0.960486322188	0.0395136778116	0.993311036789	0.0066889632107	24.3076923077	1	1.69230769231	0.011396011396
75763	clump	0.939393939394	0.0606060606061	0.993288590604	0.00671140939597	31.0	2	4.0	0.027027027027
66759	vermin	0.986197049024	0.0138029509757	0.993288590604	0.00671140939597	71.4482758621	1	2.55172413793	0.0172413793103
66759	fabulous beast	0.986197049024	0.0138029509757	0.993288590604	0.00671140939597	71.4482758621	1	2.55172413793	0.0172413793103
66759	beast, animal	0.986197049024	0.0138029509757	0.993288590604	0.00671140939597	71.4482758621	1	2.55172413793	0.0172413793103
66759	ferocious person	0.986197049024	0.0138029509757	0.993288590604	0.00671140939597	71.4482758621	1	2.55172413793	0.0172413793103
66759	domestic animal, esp. of cattle	0.986197049024	0.0138029509757	0.993288590604	0.00671140939597	71.4482758621	1	2.55172413793	0.0172413793103
66759	dangerous w. animal	0.986197049024	0.0138029509757	0.993288590604	0.00671140939597	71.4482758621	1	2.55172413793	0.0172413793103
66759	large w. animal	0.986197049024	0.0138029509757	0.993288590604	0.00671140939597	71.4482758621	1	2.55172413793	0.0172413793103
66759	ferocious or cruel person	0.986197049024	0.0138029509757	0.993288590604	0.00671140939597	71.4482758621	1	2.55172413793	0.0172413793103
66759	w. animal	0.986197049024	0.0138029509757	0.993288590604	0.00671140939597	71.4482758621	1	2.55172413793	0.0172413793103
66759	w. beast of prey	0.986197049024	0.0138029509757	0.993288590604	0.00671140939597	71.4482758621	1	2.55172413793	0.0172413793103
66759	w. beast	0.986197049024	0.0138029509757	0.993288590604	0.00671140939597	71.4482758621	1	2.55172413793	0.0172413793103
66759	ferocious beast	0.986197049024	0.0138029509757	0.993288590604	0.00671140939597	71.4482758621	1	2.55172413793	0.0172413793103
66759	predator	0.986197049024	0.0138029509757	0.993288590604	0.00671140939597	71.4482758621	1	2.55172413793	0.0172413793103
66759	insect	0.986197049024	0.0138029509757	0.993288590604	0.00671140939597	71.4482758621	1	2.55172413793	0.0172413793103
66759	ferocious animal	0.986197049024	0.0138029509757	0.993288590604	0.00671140939597	71.4482758621	1	2.55172413793	0.0172413793103
66759	worm	0.986197049024	0.0138029509757	0.993288590604	0.00671140939597	71.4482758621	1	2.55172413793	0.0172413793103
66759	cruel	0.986197049024	0.0138029509757	0.993288590604	0.00671140939597	71.4482758621	1	2.55172413793	0.0172413793103
66759	(w.) animal	0.986197049024	0.0138029509757	0.993288590604	0.00671140939597	71.4482758621	1	2.55172413793	0.0172413793103
66759	(non-poisonous) snake	0.986197049024	0.0138029509757	0.993288590604	0.00671140939597	71.4482758621	1	2.55172413793	0.0172413793103
64881	grass snake	0.950794464377	0.0492055356228	0.993248045487	0.00675195451315	57.96875	3	4.03125	0.0274038461538
74461	particle	0.959204180064	0.0407958199357	0.993246095399	0.0067539046011	164.586206897	7	9.41379310345	0.0640121927986
76222	linen garment	0.982067510549	0.0179324894515	0.993223620523	0.00677637947725	109.529411765	2	2.47058823529	0.0168558651531
76222	of linen	0.982067510549	0.0179324894515	0.993223620523	0.00677637947725	109.529411765	2	2.47058823529	0.0168558651531
76222	canvas	0.982067510549	0.0179324894515	0.993223620523	0.00677637947725	109.529411765	2	2.47058823529	0.0168558651531
76222	linen thread	0.982067510549	0.0179324894515	0.993223620523	0.00677637947725	109.529411765	2	2.47058823529	0.0168558651531
70348	edible part of fruit	0.973429951691	0.0265700483092	0.993208828523	0.00679117147708	36.6363636364	1	1.36363636364	0.00932400932401
70348	lard	0.973429951691	0.0265700483092	0.993208828523	0.00679117147708	36.6363636364	1	1.36363636364	0.00932400932401
70348	fat	0.973429951691	0.0265700483092	0.993208828523	0.00679117147708	36.6363636364	1	1.36363636364	0.00932400932401
70348	to burst (skin)	0.973429951691	0.0265700483092	0.993208828523	0.00679117147708	36.6363636364	1	1.36363636364	0.00932400932401
70348	(fat) pork	0.973429951691	0.0265700483092	0.993208828523	0.00679117147708	36.6363636364	1	1.36363636364	0.00932400932401
70348	pulp of fruit	0.973429951691	0.0265700483092	0.993208828523	0.00679117147708	36.6363636364	1	1.36363636364	0.00932400932401
66759	reptile	0.971414489897	0.0285855101035	0.993197278912	0.00680272108844	67.9655172414	2	5.03448275862	0.0344827586207
66759	bovine	0.971414489897	0.0285855101035	0.993197278912	0.00680272108844	67.9655172414	2	5.03448275862	0.0344827586207
66759	fem. deer	0.971414489897	0.0285855101035	0.993197278912	0.00680272108844	67.9655172414	2	5.03448275862	0.0344827586207
66759	quadruped	0.971414489897	0.0285855101035	0.993197278912	0.00680272108844	67.9655172414	2	5.03448275862	0.0344827586207
86220	hide	0.87825182102	0.12174817898	0.993184031159	0.00681596884129	64.9230769231	9	11.0769230769	0.0760180995475
81487	to cultivate	0.94	0.06	0.993181818182	0.00681818181818	15.6666666667	1	6.33333333333	0.0434782608696
81487	the techniques and methods	0.94	0.06	0.993181818182	0.00681818181818	15.6666666667	1	6.33333333333	0.0434782608696
81487	soil	0.94	0.06	0.993181818182	0.00681818181818	15.6666666667	1	6.33333333333	0.0434782608696
81487	tillage	0.94	0.06	0.993181818182	0.00681818181818	15.6666666667	1	6.33333333333	0.0434782608696
81487	training of the body	0.94	0.06	0.993181818182	0.00681818181818	15.6666666667	1	6.33333333333	0.0434782608696
81487	care bestowed on plants	0.94	0.06	0.993181818182	0.00681818181818	15.6666666667	1	6.33333333333	0.0434782608696
81487	observance of religious rites	0.94	0.06	0.993181818182	0.00681818181818	15.6666666667	1	6.33333333333	0.0434782608696
81487	mode of growing plants	0.94	0.06	0.993181818182	0.00681818181818	15.6666666667	1	6.33333333333	0.0434782608696
81487	labor	0.94	0.06	0.993181818182	0.00681818181818	15.6666666667	1	6.33333333333	0.0434782608696
81487	to live in	0.94	0.06	0.993181818182	0.00681818181818	15.6666666667	1	6.33333333333	0.0434782608696
81487	cultivation	0.94	0.06	0.993181818182	0.00681818181818	15.6666666667	1	6.33333333333	0.0434782608696
81487	the knowledge of a person or a social group	0.94	0.06	0.993181818182	0.00681818181818	15.6666666667	1	6.33333333333	0.0434782608696
81487	veneration of a person	0.94	0.06	0.993181818182	0.00681818181818	15.6666666667	1	6.33333333333	0.0434782608696
81487	inhabit	0.94	0.06	0.993181818182	0.00681818181818	15.6666666667	1	6.33333333333	0.0434782608696
81487	to take care of	0.94	0.06	0.993181818182	0.00681818181818	15.6666666667	1	6.33333333333	0.0434782608696
81487	the process of cultivating the land	0.94	0.06	0.993181818182	0.00681818181818	15.6666666667	1	6.33333333333	0.0434782608696
81487	honour	0.94	0.06	0.993181818182	0.00681818181818	15.6666666667	1	6.33333333333	0.0434782608696
81487	cultivating the earth	0.94	0.06	0.993181818182	0.00681818181818	15.6666666667	1	6.33333333333	0.0434782608696
81487	care	0.94	0.06	0.993181818182	0.00681818181818	15.6666666667	1	6.33333333333	0.0434782608696
81487	training or improvement of the faculties	0.94	0.06	0.993181818182	0.00681818181818	15.6666666667	1	6.33333333333	0.0434782608696
74872	cornfield	0.952127659574	0.0478723404255	0.993181818182	0.00681818181818	19.8888888889	1	2.11111111111	0.0144927536232
74872	to dry	0.952127659574	0.0478723404255	0.993181818182	0.00681818181818	19.8888888889	1	2.11111111111	0.0144927536232
74872	cut	0.952127659574	0.0478723404255	0.993181818182	0.00681818181818	19.8888888889	1	2.11111111111	0.0144927536232
74872	become parched	0.952127659574	0.0478723404255	0.993181818182	0.00681818181818	19.8888888889	1	2.11111111111	0.0144927536232
74872	the sowing of seed	0.952127659574	0.0478723404255	0.993181818182	0.00681818181818	19.8888888889	1	2.11111111111	0.0144927536232
74872	coll. field	0.952127659574	0.0478723404255	0.993181818182	0.00681818181818	19.8888888889	1	2.11111111111	0.0144927536232
74872	to split	0.952127659574	0.0478723404255	0.993181818182	0.00681818181818	19.8888888889	1	2.11111111111	0.0144927536232
74872	coarse grain	0.952127659574	0.0478723404255	0.993181818182	0.00681818181818	19.8888888889	1	2.11111111111	0.0144927536232
74872	to cut	0.952127659574	0.0478723404255	0.993181818182	0.00681818181818	19.8888888889	1	2.11111111111	0.0144927536232
74872	abounding in grain	0.952127659574	0.0478723404255	0.993181818182	0.00681818181818	19.8888888889	1	2.11111111111	0.0144927536232
74872	dried grain (?)	0.952127659574	0.0478723404255	0.993181818182	0.00681818181818	19.8888888889	1	2.11111111111	0.0144927536232
74872	spelt	0.952127659574	0.0478723404255	0.993181818182	0.00681818181818	19.8888888889	1	2.11111111111	0.0144927536232
74872	barley	0.952127659574	0.0478723404255	0.993181818182	0.00681818181818	19.8888888889	1	2.11111111111	0.0144927536232
74872	seeds	0.952127659574	0.0478723404255	0.993181818182	0.00681818181818	19.8888888889	1	2.11111111111	0.0144927536232
74872	seeding field	0.952127659574	0.0478723404255	0.993181818182	0.00681818181818	19.8888888889	1	2.11111111111	0.0144927536232
74872	grain field	0.952127659574	0.0478723404255	0.993181818182	0.00681818181818	19.8888888889	1	2.11111111111	0.0144927536232
74872	piece	0.952127659574	0.0478723404255	0.993181818182	0.00681818181818	19.8888888889	1	2.11111111111	0.0144927536232
74872	seed	0.952127659574	0.0478723404255	0.993181818182	0.00681818181818	19.8888888889	1	2.11111111111	0.0144927536232
74872	seed (coll.)	0.952127659574	0.0478723404255	0.993181818182	0.00681818181818	19.8888888889	1	2.11111111111	0.0144927536232
74872	to divide	0.952127659574	0.0478723404255	0.993181818182	0.00681818181818	19.8888888889	1	2.11111111111	0.0144927536232
54485	heifer	0.757575757576	0.242424242424	0.99316005472	0.00683994528044	18.75	6	8.25	0.0568181818182
76222	sheet	0.972814498934	0.0271855010661	0.993115076577	0.00688492342279	107.352941176	3	3.64705882353	0.0252837977296
76222	linen cloth	0.972814498934	0.0271855010661	0.993115076577	0.00688492342279	107.352941176	3	3.64705882353	0.0252837977296
66759	beast of burden	0.955589586524	0.0444104134763	0.993103448276	0.00689655172414	64.5517241379	3	7.44827586207	0.051724137931
54635	bovine animal (gen.)	0.991149179158	0.00885082084226	0.993086283186	0.00691371681416	111.983870968	1	1.01612903226	0.00707413695529
54635	fawn	0.991149179158	0.00885082084226	0.993086283186	0.00691371681416	111.983870968	1	1.01612903226	0.00707413695529
54635	oxen	0.991149179158	0.00885082084226	0.993086283186	0.00691371681416	111.983870968	1	1.01612903226	0.00707413695529
54635	cow-shaped	0.991149179158	0.00885082084226	0.993086283186	0.00691371681416	111.983870968	1	1.01612903226	0.00707413695529
54635	cattle (coll.)	0.991149179158	0.00885082084226	0.993086283186	0.00691371681416	111.983870968	1	1.01612903226	0.00707413695529
54635	stable	0.991149179158	0.00885082084226	0.993086283186	0.00691371681416	111.983870968	1	1.01612903226	0.00707413695529
54635	w. ox	0.991149179158	0.00885082084226	0.993086283186	0.00691371681416	111.983870968	1	1.01612903226	0.00707413695529
54635	beast of burden	0.991149179158	0.00885082084226	0.993086283186	0.00691371681416	111.983870968	1	1.01612903226	0.00707413695529
54635	herd of cattle	0.991149179158	0.00885082084226	0.993086283186	0.00691371681416	111.983870968	1	1.01612903226	0.00707413695529
54635	butter	0.991149179158	0.00885082084226	0.993086283186	0.00691371681416	111.983870968	1	1.01612903226	0.00707413695529
54635	(pl.) cattle	0.991149179158	0.00885082084226	0.993086283186	0.00691371681416	111.983870968	1	1.01612903226	0.00707413695529
54635	buffalo	0.991149179158	0.00885082084226	0.993086283186	0.00691371681416	111.983870968	1	1.01612903226	0.00707413695529
56214	mare	0.910447761194	0.089552238806	0.993055555556	0.00694444444444	10.1666666667	1	1.83333333333	0.0128205128205
80962	pale	0.910447761194	0.089552238806	0.993055555556	0.00694444444444	10.1666666667	1	1.83333333333	0.0128205128205
80962	shoemaker?s last	0.910447761194	0.089552238806	0.993055555556	0.00694444444444	10.1666666667	1	1.83333333333	0.0128205128205
80962	log	0.910447761194	0.089552238806	0.993055555556	0.00694444444444	10.1666666667	1	1.83333333333	0.0128205128205
80962	wooden axle of a wagon	0.910447761194	0.089552238806	0.993055555556	0.00694444444444	10.1666666667	1	1.83333333333	0.0128205128205
80962	lump	0.910447761194	0.089552238806	0.993055555556	0.00694444444444	10.1666666667	1	1.83333333333	0.0128205128205
80962	pole	0.910447761194	0.089552238806	0.993055555556	0.00694444444444	10.1666666667	1	1.83333333333	0.0128205128205
80962	post	0.910447761194	0.089552238806	0.993055555556	0.00694444444444	10.1666666667	1	1.83333333333	0.0128205128205
80962	wooden piece to which the plowshare of plow is to fixed	0.910447761194	0.089552238806	0.993055555556	0.00694444444444	10.1666666667	1	1.83333333333	0.0128205128205
80962	tree-stump	0.910447761194	0.089552238806	0.993055555556	0.00694444444444	10.1666666667	1	1.83333333333	0.0128205128205
78747	spear	0.913978494624	0.0860215053763	0.993055555556	0.00694444444444	10.625	1	1.375	0.00961538461538
78747	hatchet	0.913978494624	0.0860215053763	0.993055555556	0.00694444444444	10.625	1	1.375	0.00961538461538
78747	pitchfork	0.913978494624	0.0860215053763	0.993055555556	0.00694444444444	10.625	1	1.375	0.00961538461538
78747	pointed implement	0.913978494624	0.0860215053763	0.993055555556	0.00694444444444	10.625	1	1.375	0.00961538461538
78747	a weapon short spear	0.913978494624	0.0860215053763	0.993055555556	0.00694444444444	10.625	1	1.375	0.00961538461538
64168	red deer	0.916666666667	0.0833333333333	0.993055555556	0.00694444444444	11.0	1	1.0	0.00699300699301
75763	too much	0.903890160183	0.0961098398169	0.993041749503	0.00695825049702	28.2142857143	3	5.78571428571	0.0405405405405
66759	monster	0.938656795346	0.0613432046536	0.993006993007	0.00699300699301	61.2068965517	4	9.79310344828	0.0689655172414
57920	sow	0.818253343824	0.181746656176	0.993006993007	0.00699300699301	49.5238095238	11	10.4761904762	0.0737759892689
55443	beef	0.915857605178	0.084142394822	0.99299474606	0.00700525394046	21.7692307692	2	3.23076923077	0.022792022792
55443	ram	0.915857605178	0.084142394822	0.99299474606	0.00700525394046	21.7692307692	2	3.23076923077	0.022792022792
70348	body	0.945	0.055	0.992976294996	0.00702370500439	34.3636363636	2	2.63636363636	0.018648018648
70348	to tear	0.945	0.055	0.992976294996	0.00702370500439	34.3636363636	2	2.63636363636	0.018648018648
70348	bacon	0.945	0.055	0.992976294996	0.00702370500439	34.3636363636	2	2.63636363636	0.018648018648
70348	greasy meat	0.945	0.055	0.992976294996	0.00702370500439	34.3636363636	2	2.63636363636	0.018648018648
70348	animal flesh	0.945	0.055	0.992976294996	0.00702370500439	34.3636363636	2	2.63636363636	0.018648018648
54635	fem. of bovine animal	0.982142857143	0.0178571428571	0.992975554931	0.00702444506884	110.0	2	2.0	0.0141482739106
54635	fool	0.982142857143	0.0178571428571	0.992975554931	0.00702444506884	110.0	2	2.0	0.0141482739106
54635	bovine animal	0.982142857143	0.0178571428571	0.992975554931	0.00702444506884	110.0	2	2.0	0.0141482739106
64881	viper	0.914666666667	0.0853333333333	0.992921013413	0.00707898658718	53.59375	5	6.40625	0.0456730769231
66759	brutal person	0.923482849604	0.0765171503958	0.992907801418	0.00709219858156	60.3448275862	5	9.65517241379	0.0689655172414
54635	beef	0.972984749455	0.0270152505447	0.992861222159	0.00713877784123	108.048387097	3	2.95161290323	0.0212224108659
78162	car	0.851222104145	0.148777895855	0.992844364937	0.00715563506261	40.05	7	12.95	0.0933333333333
79218	to hit	0.811846689895	0.188153310105	0.992840095465	0.00715990453461	34.5185185185	8	9.48148148148	0.0683760683761
68324	hair	0.387434554974	0.612565445026	0.992805755396	0.00719424460432	5.69230769231	9	8.30769230769	0.0602006688963
74461	kernel	0.921146203723	0.0788537962769	0.99268738574	0.0073126142596	151.862068966	13	16.1379310345	0.118879786626
55443	cow	0.865979381443	0.134020618557	0.992647058824	0.00735294117647	19.3846153846	3	4.61538461538	0.034188034188
76721	knife (sacrificial)	0.991552956465	0.00844704353476	0.992647058824	0.00735294117647	117.384615385	1	1.61538461538	0.0119658119658
76721	to cut (grass	0.991552956465	0.00844704353476	0.992647058824	0.00735294117647	117.384615385	1	1.61538461538	0.0119658119658
76721	to destroy	0.991552956465	0.00844704353476	0.992647058824	0.00735294117647	117.384615385	1	1.61538461538	0.0119658119658
76721	battle axe	0.991552956465	0.00844704353476	0.992647058824	0.00735294117647	117.384615385	1	1.61538461538	0.0119658119658
76721	dagger	0.991552956465	0.00844704353476	0.992647058824	0.00735294117647	117.384615385	1	1.61538461538	0.0119658119658
76721	long knife	0.991552956465	0.00844704353476	0.992647058824	0.00735294117647	117.384615385	1	1.61538461538	0.0119658119658
76721	hoe	0.991552956465	0.00844704353476	0.992647058824	0.00735294117647	117.384615385	1	1.61538461538	0.0119658119658
76721	smaller scythe, held in one hand and to used in conjunction with a mathook (Burns)	0.991552956465	0.00844704353476	0.992647058824	0.00735294117647	117.384615385	1	1.61538461538	0.0119658119658
76721	sacrificial weapon	0.991552956465	0.00844704353476	0.992647058824	0.00735294117647	117.384615385	1	1.61538461538	0.0119658119658
76721	beat	0.991552956465	0.00844704353476	0.992647058824	0.00735294117647	117.384615385	1	1.61538461538	0.0119658119658
76721	to harvest	0.991552956465	0.00844704353476	0.992647058824	0.00735294117647	117.384615385	1	1.61538461538	0.0119658119658
76721	cleaver	0.991552956465	0.00844704353476	0.992647058824	0.00735294117647	117.384615385	1	1.61538461538	0.0119658119658
76721	lop off	0.991552956465	0.00844704353476	0.992647058824	0.00735294117647	117.384615385	1	1.61538461538	0.0119658119658
76721	s. axe	0.991552956465	0.00844704353476	0.992647058824	0.00735294117647	117.384615385	1	1.61538461538	0.0119658119658
76721	to reap	0.991552956465	0.00844704353476	0.992647058824	0.00735294117647	117.384615385	1	1.61538461538	0.0119658119658
74461	seed	0.914562289562	0.0854377104377	0.992585154862	0.00741484513787	149.862068966	14	17.1379310345	0.128024385597
80380	chariot	0.991136867223	0.00886313277655	0.992577790465	0.00742220953468	111.826923077	1	1.17307692308	0.00877192982456
80380	sky	0.991136867223	0.00886313277655	0.992577790465	0.00742220953468	111.826923077	1	1.17307692308	0.00877192982456
80380	tip of the hub	0.991136867223	0.00886313277655	0.992577790465	0.00742220953468	111.826923077	1	1.17307692308	0.00877192982456
80380	back	0.991136867223	0.00886313277655	0.992577790465	0.00742220953468	111.826923077	1	1.17307692308	0.00877192982456
80380	pole	0.991136867223	0.00886313277655	0.992577790465	0.00742220953468	111.826923077	1	1.17307692308	0.00877192982456
80380	wood splinter	0.991136867223	0.00886313277655	0.992577790465	0.00742220953468	111.826923077	1	1.17307692308	0.00877192982456
80380	firmament	0.991136867223	0.00886313277655	0.992577790465	0.00742220953468	111.826923077	1	1.17307692308	0.00877192982456
80380	axis especially the earth	0.991136867223	0.00886313277655	0.992577790465	0.00742220953468	111.826923077	1	1.17307692308	0.00877192982456
80380	wing	0.991136867223	0.00886313277655	0.992577790465	0.00742220953468	111.826923077	1	1.17307692308	0.00877192982456
80380	board	0.991136867223	0.00886313277655	0.992577790465	0.00742220953468	111.826923077	1	1.17307692308	0.00877192982456
76721	shears	0.982879719052	0.0171202809482	0.992529348986	0.00747065101387	114.820512821	2	3.17948717949	0.0239316239316
76721	to saw	0.982879719052	0.0171202809482	0.992529348986	0.00747065101387	114.820512821	2	3.17948717949	0.0239316239316
76721	to cut off	0.982879719052	0.0171202809482	0.992529348986	0.00747065101387	114.820512821	2	3.17948717949	0.0239316239316
74968	(white) bread	0.952095808383	0.0479041916168	0.992481203008	0.00751879699248	19.875	1	1.125	0.00852272727273
80380	shaft	0.982093663912	0.0179063360882	0.992455020313	0.00754497968659	109.692307692	2	2.30769230769	0.0175438596491
80380	drive handle	0.982093663912	0.0179063360882	0.992455020313	0.00754497968659	109.692307692	2	2.30769230769	0.0175438596491
80380	celestial axis	0.982093663912	0.0179063360882	0.992455020313	0.00754497968659	109.692307692	2	2.30769230769	0.0175438596491
80380	positioned on the axis	0.982093663912	0.0179063360882	0.992455020313	0.00754497968659	109.692307692	2	2.30769230769	0.0175438596491
76721	snare	0.973982655103	0.0260173448966	0.992407809111	0.00759219088937	112.307692308	3	4.69230769231	0.0358974358974
76721	claw of crab, shellfish, etc	0.973982655103	0.0260173448966	0.992407809111	0.00759219088937	112.307692308	3	4.69230769231	0.0358974358974
86220	skin	0.798746774788	0.201253225212	0.992397502036	0.00760249796362	55.5641025641	14	15.4358974359	0.118250377074
56214	to join	0.793103448276	0.206896551724	0.992366412214	0.00763358778626	7.66666666667	2	3.33333333333	0.025641025641
80962	block	0.793103448276	0.206896551724	0.992366412214	0.00763358778626	7.66666666667	2	3.33333333333	0.025641025641
78747	pickaxe	0.809523809524	0.190476190476	0.992366412214	0.00763358778626	8.5	2	2.5	0.0192307692308
56214	to yoke	0.823529411765	0.176470588235	0.992366412214	0.00763358778626	9.33333333333	2	1.66666666667	0.0128205128205
76721	trap	0.964864864865	0.0351351351351	0.992282249173	0.0077177508269	109.846153846	4	6.15384615385	0.0478632478632
76721	sword	0.964864864865	0.0351351351351	0.992282249173	0.0077177508269	109.846153846	4	6.15384615385	0.0478632478632
85360	wooded place	0.222222222222	0.777777777778	0.992248062016	0.0077519379845	2.0	7	7.0	0.0546875
54635	bovine	0.925075528701	0.0749244712991	0.992228784582	0.00777121541809	98.7741935484	8	7.22580645161	0.0565930956423
54635	bull	0.92570401438	0.0742959856201	0.992228784582	0.00777121541809	99.6774193548	8	6.32258064516	0.049518958687
71719	to plait	0.22555410691	0.77444589309	0.99217221135	0.00782778864971	6.40740740741	22	10.5925925926	0.0835707502374
80982	pestle	0.312169312169	0.687830687831	0.992156862745	0.0078431372549	4.53846153846	10	8.46153846154	0.066889632107
76721	sickle	0.955530216648	0.0444697833523	0.992152466368	0.00784753363229	107.435897436	5	7.5641025641	0.0598290598291
56748	horse (pej.)	0.578947368421	0.421052631579	0.992125984252	0.00787401574803	5.5	4	4.5	0.0357142857143
77754	blister	0.97280334728	0.0271966527197	0.992105263158	0.00789473684211	35.7692307692	1	2.23076923077	0.0177514792899
77754	hauling-engine for ships	0.97280334728	0.0271966527197	0.992105263158	0.00789473684211	35.7692307692	1	2.23076923077	0.0177514792899
77754	slow	0.97280334728	0.0271966527197	0.992105263158	0.00789473684211	35.7692307692	1	2.23076923077	0.0177514792899
77754	to furrow	0.97280334728	0.0271966527197	0.992105263158	0.00789473684211	35.7692307692	1	2.23076923077	0.0177514792899
77754	lazy	0.97280334728	0.0271966527197	0.992105263158	0.00789473684211	35.7692307692	1	2.23076923077	0.0177514792899
77754	to cultivate	0.97280334728	0.0271966527197	0.992105263158	0.00789473684211	35.7692307692	1	2.23076923077	0.0177514792899
77754	to split	0.97280334728	0.0271966527197	0.992105263158	0.00789473684211	35.7692307692	1	2.23076923077	0.0177514792899
77754	attractive	0.97280334728	0.0271966527197	0.992105263158	0.00789473684211	35.7692307692	1	2.23076923077	0.0177514792899
77754	to furrow or to open channels with plow	0.97280334728	0.0271966527197	0.992105263158	0.00789473684211	35.7692307692	1	2.23076923077	0.0177514792899
77754	to open	0.97280334728	0.0271966527197	0.992105263158	0.00789473684211	35.7692307692	1	2.23076923077	0.0177514792899
77754	?	0.97280334728	0.0271966527197	0.992105263158	0.00789473684211	35.7692307692	1	2.23076923077	0.0177514792899
77754	to divide	0.97280334728	0.0271966527197	0.992105263158	0.00789473684211	35.7692307692	1	2.23076923077	0.0177514792899
77711	roofer?s hammer	0.953846153846	0.0461538461538	0.992063492063	0.00793650793651	20.6666666667	1	3.33333333333	0.0266666666667
78162	road	0.73715651135	0.26284348865	0.991983967936	0.00801603206413	30.85	11	18.15	0.146666666667
78162	way	0.73715651135	0.26284348865	0.991983967936	0.00801603206413	30.85	11	18.15	0.146666666667
78162	path	0.73715651135	0.26284348865	0.991983967936	0.00801603206413	30.85	11	18.15	0.146666666667
84545	flagstaff	0.96178343949	0.0382165605096	0.991948470209	0.00805152979066	25.1666666667	1	1.83333333333	0.014880952381
84545	to cut wood	0.96178343949	0.0382165605096	0.991948470209	0.00805152979066	25.1666666667	1	1.83333333333	0.014880952381
84545	handle	0.96178343949	0.0382165605096	0.991948470209	0.00805152979066	25.1666666667	1	1.83333333333	0.014880952381
84545	spear	0.96178343949	0.0382165605096	0.991948470209	0.00805152979066	25.1666666667	1	1.83333333333	0.014880952381
84545	wooden pole	0.96178343949	0.0382165605096	0.991948470209	0.00805152979066	25.1666666667	1	1.83333333333	0.014880952381
84545	shaft	0.96178343949	0.0382165605096	0.991948470209	0.00805152979066	25.1666666667	1	1.83333333333	0.014880952381
84545	stick baton	0.96178343949	0.0382165605096	0.991948470209	0.00805152979066	25.1666666667	1	1.83333333333	0.014880952381
84545	pole	0.96178343949	0.0382165605096	0.991948470209	0.00805152979066	25.1666666667	1	1.83333333333	0.014880952381
84545	tree trunk	0.96178343949	0.0382165605096	0.991948470209	0.00805152979066	25.1666666667	1	1.83333333333	0.014880952381
84545	tree used for colouring	0.96178343949	0.0382165605096	0.991948470209	0.00805152979066	25.1666666667	1	1.83333333333	0.014880952381
84545	light and rapid wooden warship	0.96178343949	0.0382165605096	0.991948470209	0.00805152979066	25.1666666667	1	1.83333333333	0.014880952381
84545	wooden spear	0.96178343949	0.0382165605096	0.991948470209	0.00805152979066	25.1666666667	1	1.83333333333	0.014880952381
84545	barrel	0.96178343949	0.0382165605096	0.991948470209	0.00805152979066	25.1666666667	1	1.83333333333	0.014880952381
84545	wooden structure	0.96178343949	0.0382165605096	0.991948470209	0.00805152979066	25.1666666667	1	1.83333333333	0.014880952381
84545	wooden shaft	0.96178343949	0.0382165605096	0.991948470209	0.00805152979066	25.1666666667	1	1.83333333333	0.014880952381
66256	beast, esp. quadruped	0.962962962963	0.037037037037	0.991948470209	0.00805152979066	26.0	1	1.0	0.00811688311688
66256	roe deer	0.962962962963	0.037037037037	0.991948470209	0.00805152979066	26.0	1	1.0	0.00811688311688
70348	pork	0.813559322034	0.186440677966	0.991861648016	0.00813835198372	26.1818181818	6	6.81818181818	0.0559440559441
81394	boulder	0.97037037037	0.0296296296296	0.991836734694	0.00816326530612	32.75	1	2.25	0.0185185185185
81394	battlefield	0.97037037037	0.0296296296296	0.991836734694	0.00816326530612	32.75	1	2.25	0.0185185185185
81394	grindstone	0.97037037037	0.0296296296296	0.991836734694	0.00816326530612	32.75	1	2.25	0.0185185185185
81394	soil	0.97037037037	0.0296296296296	0.991836734694	0.00816326530612	32.75	1	2.25	0.0185185185185
81394	place	0.97037037037	0.0296296296296	0.991836734694	0.00816326530612	32.75	1	2.25	0.0185185185185
81394	rock	0.97037037037	0.0296296296296	0.991836734694	0.00816326530612	32.75	1	2.25	0.0185185185185
81394	earth	0.97037037037	0.0296296296296	0.991836734694	0.00816326530612	32.75	1	2.25	0.0185185185185
81394	out	0.97037037037	0.0296296296296	0.991836734694	0.00816326530612	32.75	1	2.25	0.0185185185185
77754	to pull	0.942350332594	0.0576496674058	0.991825613079	0.00817438692098	32.6923076923	2	4.30769230769	0.0355029585799
77754	to plow	0.942350332594	0.0576496674058	0.991825613079	0.00817438692098	32.6923076923	2	4.30769230769	0.0355029585799
77754	line traced in the earth	0.942350332594	0.0576496674058	0.991825613079	0.00817438692098	32.6923076923	2	4.30769230769	0.0355029585799
77754	wake of a boat	0.945720250522	0.0542797494781	0.991825613079	0.00817438692098	34.8461538462	2	2.15384615385	0.0177514792899
77754	soil	0.945720250522	0.0542797494781	0.991825613079	0.00817438692098	34.8461538462	2	2.15384615385	0.0177514792899
77754	channel	0.945720250522	0.0542797494781	0.991825613079	0.00817438692098	34.8461538462	2	2.15384615385	0.0177514792899
80380	shoulder	0.934331589392	0.065668410608	0.991774754824	0.00822524517558	99.5961538462	7	7.40384615385	0.0614035087719
76721	scissors	0.926275992439	0.0737240075614	0.99173553719	0.00826446280992	100.512820513	8	11.4871794872	0.0957264957265
86157	skin (person's)	0.976863753213	0.0231362467866	0.99173553719	0.00826446280992	42.2222222222	1	1.77777777778	0.0148148148148
86157	bark (of tree)	0.976863753213	0.0231362467866	0.99173553719	0.00826446280992	42.2222222222	1	1.77777777778	0.0148148148148
85517	engraved stone	0.905405405405	0.0945945945946	0.99173553719	0.00826446280992	9.57142857143	1	1.42857142857	0.0119047619048
85517	stone seat	0.905405405405	0.0945945945946	0.99173553719	0.00826446280992	9.57142857143	1	1.42857142857	0.0119047619048
85517	pebble	0.905405405405	0.0945945945946	0.99173553719	0.00826446280992	9.57142857143	1	1.42857142857	0.0119047619048
85517	marker stone	0.905405405405	0.0945945945946	0.99173553719	0.00826446280992	9.57142857143	1	1.42857142857	0.0119047619048
67901	fleece	0.905405405405	0.0945945945946	0.99173553719	0.00826446280992	9.57142857143	1	1.42857142857	0.0119047619048
67901	animal hair	0.905405405405	0.0945945945946	0.99173553719	0.00826446280992	9.57142857143	1	1.42857142857	0.0119047619048
67901	hair	0.905405405405	0.0945945945946	0.99173553719	0.00826446280992	9.57142857143	1	1.42857142857	0.0119047619048
67901	(animal) hair	0.905405405405	0.0945945945946	0.99173553719	0.00826446280992	9.57142857143	1	1.42857142857	0.0119047619048
67901	rough-skinned	0.905405405405	0.0945945945946	0.99173553719	0.00826446280992	9.57142857143	1	1.42857142857	0.0119047619048
70910	thigh	0.906976744186	0.093023255814	0.99173553719	0.00826446280992	9.75	1	1.25	0.0104166666667
70910	suet	0.906976744186	0.093023255814	0.99173553719	0.00826446280992	9.75	1	1.25	0.0104166666667
70910	lard	0.906976744186	0.093023255814	0.99173553719	0.00826446280992	9.75	1	1.25	0.0104166666667
70910	tallow	0.906976744186	0.093023255814	0.99173553719	0.00826446280992	9.75	1	1.25	0.0104166666667
70910	marrow	0.906976744186	0.093023255814	0.99173553719	0.00826446280992	9.75	1	1.25	0.0104166666667
80116	hoop	0.987632508834	0.0123674911661	0.991685563114	0.00831443688587	79.8571428571	1	1.14285714286	0.0095818815331
80116	ring	0.987632508834	0.0123674911661	0.991685563114	0.00831443688587	79.8571428571	1	1.14285714286	0.0095818815331
80116	sun	0.987632508834	0.0123674911661	0.991685563114	0.00831443688587	79.8571428571	1	1.14285714286	0.0095818815331
80116	(pl.) cart	0.987632508834	0.0123674911661	0.991685563114	0.00831443688587	79.8571428571	1	1.14285714286	0.0095818815331
80116	easy	0.987632508834	0.0123674911661	0.991685563114	0.00831443688587	79.8571428571	1	1.14285714286	0.0095818815331
80116	role	0.987632508834	0.0123674911661	0.991685563114	0.00831443688587	79.8571428571	1	1.14285714286	0.0095818815331
80116	to rotate	0.987632508834	0.0123674911661	0.991685563114	0.00831443688587	79.8571428571	1	1.14285714286	0.0095818815331
80116	cart	0.987632508834	0.0123674911661	0.991685563114	0.00831443688587	79.8571428571	1	1.14285714286	0.0095818815331
80116	rotate	0.987632508834	0.0123674911661	0.991685563114	0.00831443688587	79.8571428571	1	1.14285714286	0.0095818815331
80116	wheel rim	0.987632508834	0.0123674911661	0.991685563114	0.00831443688587	79.8571428571	1	1.14285714286	0.0095818815331
80116	wheel-rim	0.987632508834	0.0123674911661	0.991685563114	0.00831443688587	79.8571428571	1	1.14285714286	0.0095818815331
80116	heaven	0.987632508834	0.0123674911661	0.991685563114	0.00831443688587	79.8571428571	1	1.14285714286	0.0095818815331
80116	red (color)	0.987632508834	0.0123674911661	0.991685563114	0.00831443688587	79.8571428571	1	1.14285714286	0.0095818815331
80116	aura	0.987632508834	0.0123674911661	0.991685563114	0.00831443688587	79.8571428571	1	1.14285714286	0.0095818815331
80116	cog	0.987632508834	0.0123674911661	0.991685563114	0.00831443688587	79.8571428571	1	1.14285714286	0.0095818815331
73858	nutrition	0.931818181818	0.0681818181818	0.991666666667	0.00833333333333	13.6666666667	1	2.33333333333	0.0196078431373
73858	bait	0.931818181818	0.0681818181818	0.991666666667	0.00833333333333	13.6666666667	1	2.33333333333	0.0196078431373
73858	to nourish	0.931818181818	0.0681818181818	0.991666666667	0.00833333333333	13.6666666667	1	2.33333333333	0.0196078431373
73858	to feed	0.931818181818	0.0681818181818	0.991666666667	0.00833333333333	13.6666666667	1	2.33333333333	0.0196078431373
73858	dry foodstuff	0.931818181818	0.0681818181818	0.991666666667	0.00833333333333	13.6666666667	1	2.33333333333	0.0196078431373
87487	scion	0.933333333333	0.0666666666667	0.991666666667	0.00833333333333	14.0	1	2.0	0.0168067226891
87487	s. branch growing from a graft	0.933333333333	0.0666666666667	0.991666666667	0.00833333333333	14.0	1	2.0	0.0168067226891
86384	(slayed) skin	0.935251798561	0.0647482014388	0.991666666667	0.00833333333333	14.4444444444	1	1.55555555556	0.0130718954248
86384	animal skin	0.935251798561	0.0647482014388	0.991666666667	0.00833333333333	14.4444444444	1	1.55555555556	0.0130718954248
86384	to split	0.935251798561	0.0647482014388	0.991666666667	0.00833333333333	14.4444444444	1	1.55555555556	0.0130718954248
86384	skin	0.935251798561	0.0647482014388	0.991666666667	0.00833333333333	14.4444444444	1	1.55555555556	0.0130718954248
92514	trace made by plow	0.948598130841	0.0514018691589	0.991666666667	0.00833333333333	18.4545454545	1	1.54545454545	0.012987012987
92514	wooden tool	0.948598130841	0.0514018691589	0.991666666667	0.00833333333333	18.4545454545	1	1.54545454545	0.012987012987
92514	s. adze	0.948598130841	0.0514018691589	0.991666666667	0.00833333333333	18.4545454545	1	1.54545454545	0.012987012987
77711	hoe	0.892857142857	0.107142857143	0.991649269311	0.00835073068894	16.6666666667	2	6.33333333333	0.0533333333333
77711	digging tool	0.892857142857	0.107142857143	0.991649269311	0.00835073068894	16.6666666667	2	6.33333333333	0.0533333333333
77711	hatchet	0.892857142857	0.107142857143	0.991649269311	0.00835073068894	16.6666666667	2	6.33333333333	0.0533333333333
77711	barrel-maker?s bent hatchet	0.892857142857	0.107142857143	0.991649269311	0.00835073068894	16.6666666667	2	6.33333333333	0.0533333333333
77711	cutting implement	0.892857142857	0.107142857143	0.991649269311	0.00835073068894	16.6666666667	2	6.33333333333	0.0533333333333
66759	animal	0.640310077519	0.359689922481	0.991596638655	0.00840336134454	28.4827586207	16	30.5172413793	0.258620689655
77405	firm	0.967821782178	0.0321782178218	0.991586538462	0.00841346153846	30.0769230769	1	1.92307692308	0.016317016317
77405	peg	0.967821782178	0.0321782178218	0.991586538462	0.00841346153846	30.0769230769	1	1.92307692308	0.016317016317
77405	to insert	0.967821782178	0.0321782178218	0.991586538462	0.00841346153846	30.0769230769	1	1.92307692308	0.016317016317
77405	club	0.967821782178	0.0321782178218	0.991586538462	0.00841346153846	30.0769230769	1	1.92307692308	0.016317016317
77405	blade	0.967821782178	0.0321782178218	0.991586538462	0.00841346153846	30.0769230769	1	1.92307692308	0.016317016317
77405	stave	0.967821782178	0.0321782178218	0.991586538462	0.00841346153846	30.0769230769	1	1.92307692308	0.016317016317
77405	to join	0.967821782178	0.0321782178218	0.991586538462	0.00841346153846	30.0769230769	1	1.92307692308	0.016317016317
77405	face	0.967821782178	0.0321782178218	0.991586538462	0.00841346153846	30.0769230769	1	1.92307692308	0.016317016317
77405	solid	0.967821782178	0.0321782178218	0.991586538462	0.00841346153846	30.0769230769	1	1.92307692308	0.016317016317
77405	to fix	0.967821782178	0.0321782178218	0.991586538462	0.00841346153846	30.0769230769	1	1.92307692308	0.016317016317
77405	surface	0.967821782178	0.0321782178218	0.991586538462	0.00841346153846	30.0769230769	1	1.92307692308	0.016317016317
77405	sword	0.967821782178	0.0321782178218	0.991586538462	0.00841346153846	30.0769230769	1	1.92307692308	0.016317016317
77405	walking-stick	0.967821782178	0.0321782178218	0.991586538462	0.00841346153846	30.0769230769	1	1.92307692308	0.016317016317
77405	to attach	0.967821782178	0.0321782178218	0.991586538462	0.00841346153846	30.0769230769	1	1.92307692308	0.016317016317
77405	wooden post	0.967821782178	0.0321782178218	0.991586538462	0.00841346153846	30.0769230769	1	1.92307692308	0.016317016317
77405	stick	0.967821782178	0.0321782178218	0.991586538462	0.00841346153846	30.0769230769	1	1.92307692308	0.016317016317
84545	log	0.918367346939	0.0816326530612	0.991568296796	0.00843170320405	22.5	2	3.5	0.0297619047619
84545	club	0.918367346939	0.0816326530612	0.991568296796	0.00843170320405	22.5	2	3.5	0.0297619047619
84545	wooden beam	0.918367346939	0.0816326530612	0.991568296796	0.00843170320405	22.5	2	3.5	0.0297619047619
84545	stick	0.918367346939	0.0816326530612	0.991568296796	0.00843170320405	22.5	2	3.5	0.0297619047619
66256	w. animal	0.923344947735	0.0766550522648	0.991568296796	0.00843170320405	24.0909090909	2	1.90909090909	0.0162337662338
77754	to drag	0.908450704225	0.0915492957746	0.991525423729	0.00847457627119	29.7692307692	3	6.23076923077	0.0532544378698
56214	fem. horse	0.647058823529	0.352941176471	0.991525423729	0.00847457627119	5.5	3	4.5	0.0384615384615
81394	standing stone	0.936842105263	0.0631578947368	0.991525423729	0.00847457627119	29.6666666667	2	4.33333333333	0.037037037037
81394	outside	0.936842105263	0.0631578947368	0.991525423729	0.00847457627119	29.6666666667	2	4.33333333333	0.037037037037
80116	circle	0.974925373134	0.0250746268657	0.991510162079	0.00848983792128	77.7619047619	2	2.2380952381	0.0191637630662
83276	early part of the year	0.964577656676	0.0354223433243	0.991379310345	0.00862068965517	27.2307692308	1	1.76923076923	0.0153846153846
83276	cow	0.964577656676	0.0354223433243	0.991379310345	0.00862068965517	27.2307692308	1	1.76923076923	0.0153846153846
83276	(late) autumn	0.964577656676	0.0354223433243	0.991379310345	0.00862068965517	27.2307692308	1	1.76923076923	0.0153846153846
83276	next year	0.964577656676	0.0354223433243	0.991379310345	0.00862068965517	27.2307692308	1	1.76923076923	0.0153846153846
57237	hind, doe	0.987660538907	0.0123394610929	0.991255144033	0.00874485596708	80.0408163265	1	0.959183673469	0.00846192135391
57237	fem. of various species of deer	0.987660538907	0.0123394610929	0.991255144033	0.00874485596708	80.0408163265	1	0.959183673469	0.00846192135391
57237	doe	0.987660538907	0.0123394610929	0.991255144033	0.00874485596708	80.0408163265	1	0.959183673469	0.00846192135391
57237	shepherd	0.987660538907	0.0123394610929	0.991255144033	0.00874485596708	80.0408163265	1	0.959183673469	0.00846192135391
57237	mother sheep	0.987660538907	0.0123394610929	0.991255144033	0.00874485596708	80.0408163265	1	0.959183673469	0.00846192135391
57237	yearling buck	0.987660538907	0.0123394610929	0.991255144033	0.00874485596708	80.0408163265	1	0.959183673469	0.00846192135391
57237	herd	0.987660538907	0.0123394610929	0.991255144033	0.00874485596708	80.0408163265	1	0.959183673469	0.00846192135391
57237	ram lamb	0.987660538907	0.0123394610929	0.991255144033	0.00874485596708	80.0408163265	1	0.959183673469	0.00846192135391
57237	buck	0.987660538907	0.0123394610929	0.991255144033	0.00874485596708	80.0408163265	1	0.959183673469	0.00846192135391
57237	hind	0.987660538907	0.0123394610929	0.991255144033	0.00874485596708	80.0408163265	1	0.959183673469	0.00846192135391
57237	s. ewe	0.987660538907	0.0123394610929	0.991255144033	0.00874485596708	80.0408163265	1	0.959183673469	0.00846192135391
57237	y. ewe	0.987660538907	0.0123394610929	0.991255144033	0.00874485596708	80.0408163265	1	0.959183673469	0.00846192135391
57237	flock	0.987660538907	0.0123394610929	0.991255144033	0.00874485596708	80.0408163265	1	0.959183673469	0.00846192135391
57237	ewe lamb (?)	0.987660538907	0.0123394610929	0.991255144033	0.00874485596708	80.0408163265	1	0.959183673469	0.00846192135391
57237	sheepfold	0.987660538907	0.0123394610929	0.991255144033	0.00874485596708	80.0408163265	1	0.959183673469	0.00846192135391
85377	mountain	0.464882943144	0.535117056856	0.991202346041	0.00879765395894	8.6875	10	7.3125	0.0649038461538
77711	battle axe	0.8125	0.1875	0.991189427313	0.00881057268722	13.0	3	9.0	0.08
85360	forest	0.111111111111	0.888888888889	0.991150442478	0.00884955752212	1.0	8	7.0	0.0625
92514	adze	0.889447236181	0.110552763819	0.991150442478	0.00884955752212	16.0909090909	2	2.90909090909	0.025974025974
92514	wooden carving tool	0.889447236181	0.110552763819	0.991150442478	0.00884955752212	16.0909090909	2	2.90909090909	0.025974025974
92514	hoe	0.889447236181	0.110552763819	0.991150442478	0.00884955752212	16.0909090909	2	2.90909090909	0.025974025974
80116	cylindrical object	0.948529411765	0.0514705882353	0.9911361805	0.0088638195004	73.7142857143	4	4.28571428571	0.0383275261324
80116	to roll	0.948529411765	0.0514705882353	0.9911361805	0.0088638195004	73.7142857143	4	4.28571428571	0.0383275261324
80116	flow	0.948529411765	0.0514705882353	0.9911361805	0.0088638195004	73.7142857143	4	4.28571428571	0.0383275261324
76721	to cut	0.884615384615	0.115384615385	0.991105463787	0.00889453621347	92.0	12	16.0	0.14358974359
75763	cluster	0.617021276596	0.382978723404	0.991071428571	0.00892857142857	14.5	9	13.5	0.121621621622
75763	bunch	0.617021276596	0.382978723404	0.991071428571	0.00892857142857	14.5	9	13.5	0.121621621622
57237	yearling ewe	0.975038206826	0.0249617931737	0.991066736731	0.00893326326852	78.1224489796	2	1.87755102041	0.0169238427078
73858	fodder	0.842105263158	0.157894736842	0.991031390135	0.00896860986547	10.6666666667	2	4.33333333333	0.0392156862745
73858	oats	0.842105263158	0.157894736842	0.991031390135	0.00896860986547	10.6666666667	2	4.33333333333	0.0392156862745
87487	flagstaff	0.849462365591	0.150537634409	0.991031390135	0.00896860986547	11.2857142857	2	3.71428571429	0.0336134453782
87487	rod	0.849462365591	0.150537634409	0.991031390135	0.00896860986547	11.2857142857	2	3.71428571429	0.0336134453782
87487	javelin	0.849462365591	0.150537634409	0.991031390135	0.00896860986547	11.2857142857	2	3.71428571429	0.0336134453782
87487	to split	0.849462365591	0.150537634409	0.991031390135	0.00896860986547	11.2857142857	2	3.71428571429	0.0336134453782
87487	to divide	0.849462365591	0.150537634409	0.991031390135	0.00896860986547	11.2857142857	2	3.71428571429	0.0336134453782
66759	beast	0.460465116279	0.539534883721	0.990990990991	0.00900900900901	17.0689655172	20	37.9310344828	0.344827586207
83276	season	0.924855491329	0.0751445086705	0.990990990991	0.00900900900901	24.6153846154	2	3.38461538462	0.0307692307692
83276	time	0.924855491329	0.0751445086705	0.990990990991	0.00900900900901	24.6153846154	2	3.38461538462	0.0307692307692
80116	s. wheel	0.934863523573	0.0651364764268	0.990936555891	0.00906344410876	71.7619047619	5	5.2380952381	0.0479094076655
86157	skin	0.896253602305	0.103746397695	0.990888382688	0.00911161731207	34.5555555556	4	6.44444444444	0.0592592592593
57237	fem. sheep	0.962142673191	0.0378573268092	0.990870032223	0.00912996777658	76.2448979592	3	2.75510204082	0.0253857640617
77405	pole	0.891666666667	0.108333333333	0.990861618799	0.00913838120104	24.6923076923	3	5.30769230769	0.048951048951
55443	bovine	0.619246861925	0.380753138075	0.990825688073	0.00917431192661	11.3846153846	7	8.61538461538	0.0797720797721
67901	fur	0.787878787879	0.212121212121	0.990825688073	0.00917431192661	7.42857142857	2	2.57142857143	0.0238095238095
67901	bristle	0.787878787879	0.212121212121	0.990825688073	0.00917431192661	7.42857142857	2	2.57142857143	0.0238095238095
67901	mangy	0.813333333333	0.186666666667	0.990825688073	0.00917431192661	8.71428571429	2	1.28571428571	0.0119047619048
70348	flesh	0.7	0.3	0.990762124711	0.00923787528868	21.0	9	9.0	0.0839160839161
80116	to run	0.920903954802	0.0790960451977	0.990727732509	0.00927226749087	69.8571428571	6	6.14285714286	0.0574912891986
77041	harvest time	0.940476190476	0.0595238095238	0.990712074303	0.00928792569659	15.8	1	3.2	0.03
77041	meadow	0.940476190476	0.0595238095238	0.990712074303	0.00928792569659	15.8	1	3.2	0.03
77041	bump	0.940476190476	0.0595238095238	0.990712074303	0.00928792569659	15.8	1	3.2	0.03
77041	to thrust	0.940476190476	0.0595238095238	0.990712074303	0.00928792569659	15.8	1	3.2	0.03
77041	pavement	0.940476190476	0.0595238095238	0.990712074303	0.00928792569659	15.8	1	3.2	0.03
77041	to hew	0.940476190476	0.0595238095238	0.990712074303	0.00928792569659	15.8	1	3.2	0.03
77041	August	0.940476190476	0.0595238095238	0.990712074303	0.00928792569659	15.8	1	3.2	0.03
77041	to pound	0.940476190476	0.0595238095238	0.990712074303	0.00928792569659	15.8	1	3.2	0.03
77041	to cut	0.940476190476	0.0595238095238	0.990712074303	0.00928792569659	15.8	1	3.2	0.03
80380	armpit	0.861491628615	0.138508371385	0.990586531499	0.00941346850109	87.0769230769	14	12.9230769231	0.122807017544
86157	animal skin	0.865671641791	0.134328358209	0.990566037736	0.00943396226415	32.2222222222	5	7.77777777778	0.0740740740741
92514	endscraper	0.822580645161	0.177419354839	0.990566037736	0.00943396226415	13.9090909091	3	4.09090909091	0.038961038961
54635	ox	0.821153846154	0.178846153846	0.990555345674	0.00944465432565	82.6451612903	18	13.3548387097	0.127334465195
80116	round	0.906666666667	0.0933333333333	0.990509059534	0.00949094046592	68.0	7	7.0	0.0670731707317
56214	beast of burden	0.478260869565	0.521739130435	0.990476190476	0.00952380952381	3.66666666667	4	5.33333333333	0.0512820512821
93893	sledgehammer	0.930434782609	0.0695652173913	0.990476190476	0.00952380952381	13.375	1	1.625	0.015625
93893	hatchet	0.930434782609	0.0695652173913	0.990476190476	0.00952380952381	13.375	1	1.625	0.015625
93893	s. axe	0.930434782609	0.0695652173913	0.990476190476	0.00952380952381	13.375	1	1.625	0.015625
93893	little axe	0.930434782609	0.0695652173913	0.990476190476	0.00952380952381	13.375	1	1.625	0.015625
74307	goiter	0.931297709924	0.0687022900763	0.990476190476	0.00952380952381	13.5555555556	1	1.44444444444	0.0138888888889
74307	bird-feed	0.931297709924	0.0687022900763	0.990476190476	0.00952380952381	13.5555555556	1	1.44444444444	0.0138888888889
74307	straw	0.931297709924	0.0687022900763	0.990476190476	0.00952380952381	13.5555555556	1	1.44444444444	0.0138888888889
74307	bill	0.931297709924	0.0687022900763	0.990476190476	0.00952380952381	13.5555555556	1	1.44444444444	0.0138888888889
74307	crop	0.931297709924	0.0687022900763	0.990476190476	0.00952380952381	13.5555555556	1	1.44444444444	0.0138888888889
74307	fodder (grain)	0.931297709924	0.0687022900763	0.990476190476	0.00952380952381	13.5555555556	1	1.44444444444	0.0138888888889
74307	to desire	0.931297709924	0.0687022900763	0.990476190476	0.00952380952381	13.5555555556	1	1.44444444444	0.0138888888889
74307	grain	0.931297709924	0.0687022900763	0.990476190476	0.00952380952381	13.5555555556	1	1.44444444444	0.0138888888889
74307	beak	0.931297709924	0.0687022900763	0.990476190476	0.00952380952381	13.5555555556	1	1.44444444444	0.0138888888889
74307	(solid) fodder	0.931297709924	0.0687022900763	0.990476190476	0.00952380952381	13.5555555556	1	1.44444444444	0.0138888888889
80895	the wood of the box tree	0.953947368421	0.0460526315789	0.99043062201	0.00956937799043	20.7142857143	1	1.28571428571	0.0124223602484
80895	object made from boxwood	0.953947368421	0.0460526315789	0.99043062201	0.00956937799043	20.7142857143	1	1.28571428571	0.0124223602484
80895	s. box	0.953947368421	0.0460526315789	0.99043062201	0.00956937799043	20.7142857143	1	1.28571428571	0.0124223602484
80895	cylindrical object	0.953947368421	0.0460526315789	0.99043062201	0.00956937799043	20.7142857143	1	1.28571428571	0.0124223602484
80895	cartridge	0.953947368421	0.0460526315789	0.99043062201	0.00956937799043	20.7142857143	1	1.28571428571	0.0124223602484
80895	evergreen shrub or tree of the genus Buxus	0.953947368421	0.0460526315789	0.99043062201	0.00956937799043	20.7142857143	1	1.28571428571	0.0124223602484
80895	boxwood	0.953947368421	0.0460526315789	0.99043062201	0.00956937799043	20.7142857143	1	1.28571428571	0.0124223602484
80895	dowel	0.953947368421	0.0460526315789	0.99043062201	0.00956937799043	20.7142857143	1	1.28571428571	0.0124223602484
80895	container with flat sides and typically made of wood or card	0.953947368421	0.0460526315789	0.99043062201	0.00956937799043	20.7142857143	1	1.28571428571	0.0124223602484
80895	?	0.953947368421	0.0460526315789	0.99043062201	0.00956937799043	20.7142857143	1	1.28571428571	0.0124223602484
80895	box tree	0.953947368421	0.0460526315789	0.99043062201	0.00956937799043	20.7142857143	1	1.28571428571	0.0124223602484
77626	oar	0.142857142857	0.857142857143	0.990415335463	0.00958466453674	3.0	18	10.0	0.0967741935484
59875	noise	0.987951807229	0.0120481927711	0.990374873354	0.0096251266464	82.0	1	2.0	0.0194373401535
59875	word	0.987951807229	0.0120481927711	0.990374873354	0.0096251266464	82.0	1	2.0	0.0194373401535
59875	capon	0.987951807229	0.0120481927711	0.990374873354	0.0096251266464	82.0	1	2.0	0.0194373401535
59875	to speak	0.987951807229	0.0120481927711	0.990374873354	0.0096251266464	82.0	1	2.0	0.0194373401535
59875	(arc.) speech	0.987951807229	0.0120481927711	0.990374873354	0.0096251266464	82.0	1	2.0	0.0194373401535
59875	verb	0.987951807229	0.0120481927711	0.990374873354	0.0096251266464	82.0	1	2.0	0.0194373401535
59875	singing	0.987951807229	0.0120481927711	0.990374873354	0.0096251266464	82.0	1	2.0	0.0194373401535
59875	event	0.987951807229	0.0120481927711	0.990374873354	0.0096251266464	82.0	1	2.0	0.0194373401535
87487	stick	0.746987951807	0.253012048193	0.990291262136	0.00970873786408	8.85714285714	3	5.14285714286	0.0504201680672
86384	to skin	0.769230769231	0.230769230769	0.990291262136	0.00970873786408	10.0	3	4.0	0.0392156862745
86384	to destroy	0.769230769231	0.230769230769	0.990291262136	0.00970873786408	10.0	3	4.0	0.0392156862745
78530	to file	0.96683046683	0.0331695331695	0.990277777778	0.00972222222222	29.1481481481	1	0.851851851852	0.00836320191159
[truncated: 4,225 more rows]
