# Supplementary material for: The evolution of lexical semantics dynamics, directionality, and drift
Source: Frontiers journal article supplement (doi:10.3389/fcomm.2023.1126249), 2023-05-19
Supplement: Table_5.xlsx [file Table_5.xlsx]

## Sheet: carling_meaning-transitions
Meaning	P(0|0)	P(1|0)	P(0|1)	P(1|1)	#(0|0)	#(1|0)	#(0|1)	#(1|1)
ash	0.0	1.0	0.0	1.0	0.0	1	0.0	5.33333333333
fem. of the w. boar	0.0	1.0	0.0	1.0	0.0	3	0.0	0.5
goat (fem.)	0.0	1.0	0.0	1.0	0.0	2	0.0	0.5
new	0.0	1.0	0.8	0.2	0.0	2	2.0	0.5
bell metal	0.0	1.0	0.8	0.2	0.0	2	2.0	0.5
brood hen	0.0178571428571	0.982142857143	0.8	0.2	0.181818181818	10	1.81818181818	0.454545454545
aurochs (f.)	0.0769230769231	0.923076923077	0.666666666667	0.333333333333	0.25	3	0.75	0.375
day	0.130434782609	0.869565217391	0.857142857143	0.142857142857	0.6	4	2.4	0.4
oar	0.142857142857	0.857142857143	0.990415335463	0.00958466453674	3.0	18	10.0	0.0967741935484
pear	0.158163265306	0.841836734694	0.984615384615	0.0153846153846	2.06666666667	11	2.93333333333	0.0458333333333
shield	0.166666666667	0.833333333333	0.147058823529	0.852941176471	0.2	1	0.8	4.64
wooded place	0.222222222222	0.777777777778	0.992248062016	0.0077519379845	2.0	7	7.0	0.0546875
hairy	0.222222222222	0.777777777778	0.994475138122	0.00552486187845	2.0	7	15.0	0.0833333333333
to plait	0.22555410691	0.77444589309	0.99217221135	0.00782778864971	6.40740740741	22	10.5925925926	0.0835707502374
alive	0.247311827957	0.752688172043	0.993464052288	0.00653594771242	3.28571428571	10	5.71428571429	0.0375939849624
bowstring	0.25	0.75	0.0	1.0	1.0	3	0.0	0.25
y. rabbit	0.25	0.75	0.833333333333	0.166666666667	1.0	3	1.0	0.2
cattle driver	0.285714285714	0.714285714286	0.857142857143	0.142857142857	1.2	3	1.8	0.3
hazelnut	0.285714285714	0.714285714286	0.933333333333	0.0666666666667	2.0	5	5.0	0.357142857143
awl	0.285714285714	0.714285714286	0.994082840237	0.00591715976331	5.6	14	8.4	0.05
of mixed race	0.28813559322	0.71186440678	0.942857142857	0.0571428571429	2.42857142857	6	2.57142857143	0.155844155844
wax	0.309452190255	0.690547809745	0.767244370664	0.232755629336	24.1987854251	54	17.8012145749	5.40027800757
pestle	0.312169312169	0.687830687831	0.992156862745	0.0078431372549	4.53846153846	10	8.46153846154	0.066889632107
file	0.326753246753	0.673246753247	0.881105578247	0.118894421753	11.6481481481	24	2.35185185185	0.317353643967
year-old calf	0.333333333333	0.666666666667	0.0	1.0	1.0	2	0.0	0.222222222222
pig (m.	0.333333333333	0.666666666667	0.0	1.0	1.0	2	0.0	0.222222222222
breed of w. duck	0.333333333333	0.666666666667	0.666666666667	0.333333333333	0.5	1	0.5	0.25
crab-apple	0.333333333333	0.666666666667	0.666666666667	0.333333333333	0.5	1	0.5	0.25
dark-complexioned cow	0.333333333333	0.666666666667	0.666666666667	0.333333333333	0.5	1	0.5	0.25
reddish-brown cow	0.333333333333	0.666666666667	0.666666666667	0.333333333333	0.5	1	0.5	0.25
forest apple	0.333333333333	0.666666666667	0.666666666667	0.333333333333	0.5	1	0.5	0.25
soft variety of wheat	0.333333333333	0.666666666667	0.666666666667	0.333333333333	0.5	1	0.5	0.25
lamb over one year old	0.333333333333	0.666666666667	0.857142857143	0.142857142857	1.0	2	2.0	0.333333333333
salted meat	0.333333333333	0.666666666667	0.981818181818	0.0181818181818	1.0	2	6.0	0.111111111111
chisel	0.347826086957	0.652173913043	0.888888888889	0.111111111111	1.6	3	2.4	0.3
wisent, (European) bison	0.369426751592	0.630573248408	0.886923562855	0.113076437145	10.5454545455	18	2.45454545455	0.312937062937
to weed	0.375	0.625	0.776699029126	0.223300970874	3.0	5	1.0	0.2875
offspring of domestic animals	0.384615384615	0.615384615385	0.9375	0.0625	3.125	5	1.875	0.125
ice	0.384615384615	0.615384615385	0.96	0.04	2.5	4	1.5	0.0625
knitting machine	0.409836065574	0.590163934426	0.909090909091	0.0909090909091	2.77777777778	4	2.22222222222	0.222222222222
to filter	0.411764705882	0.588235294118	0.9375	0.0625	3.5	5	1.5	0.1
rake	0.413043478261	0.586956521739	0.920353982301	0.0796460176991	6.33333333333	9	4.66666666667	0.403846153846
bristle	0.441661173368	0.558338826632	0.950421417947	0.0495785820526	8.7012987013	11	8.2987012987	0.4329004329
raven	0.452950047987	0.547049952013	0.391977485189	0.608022514811	7.45187969925	9	57.5481203008	89.2667414584
(fragment of) stone	0.454545454545	0.545454545455	0.909090909091	0.0909090909091	1.66666666667	2	3.33333333333	0.333333333333
barn	0.454545454545	0.545454545455	0.909090909091	0.0909090909091	2.5	3	2.5	0.25
loquat	0.475	0.525	0.954545454545	0.0454545454545	2.71428571429	3	1.28571428571	0.0612244897959
posthorse	0.485148514851	0.514851485149	0.923076923077	0.0769230769231	7.53846153846	8	2.46153846154	0.205128205128
lion	0.486692015209	0.513307984791	0.163296705911	0.836703294089	8.53333333333	9	9.46666666667	48.5055172414
scythe, sickle	0.5	0.5	0.0	1.0	1.0	1	0.0	1.5
plow (verb)	0.5	0.5	0.0	1.0	1.0	1	0.0	1.5
reddish-brown	0.5	0.5	0.0	1.0	2.0	2	0.0	0.5
to quack	0.5	0.5	0.0	1.0	2.0	2	0.0	0.333333333333
kind of plowshare	0.5	0.5	0.0	1.0	2.0	2	0.0	0.25
early	0.5	0.5	0.0	1.0	1.0	1	0.0	0.25
silver and iron melted together	0.5	0.5	0.0	1.0	1.0	1	0.0	0.25
a breed of dog	0.5	0.5	0.0	1.0	1.0	1	0.0	0.25
barley-groats	0.5	0.5	0.0	1.0	1.0	1	0.0	0.25
summer wheat	0.5	0.5	0.0	1.0	1.0	1	0.0	0.25
castrate	0.5	0.5	0.0	1.0	1.0	1	0.0	0.25
sword with a straight double-edged blade	0.5	0.5	0.0	1.0	1.0	1	0.0	0.25
to gild	0.5	0.5	0.8	0.2	1.0	1	1.0	0.25
gem	0.5	0.5	0.8	0.2	1.0	1	1.0	0.25
hand (not arm)	0.5	0.5	0.8	0.2	1.0	1	1.0	0.25
gilded	0.5	0.5	0.8	0.2	1.0	1	1.0	0.25
shoulder blade	0.5	0.5	0.8	0.2	1.0	1	1.0	0.25
grapevine	0.5	0.5	0.8	0.2	1.0	1	1.0	0.25
white poplar	0.5	0.5	0.8	0.2	1.0	1	1.0	0.25
bent	0.5	0.5	0.827346465817	0.172653534183	5.0	5	6.0	1.25210084034
drop	0.5	0.5	0.909090909091	0.0909090909091	4.0	4	2.0	0.2
large black bee	0.5	0.5	0.909090909091	0.0909090909091	2.0	2	1.0	0.1
crane	0.5	0.5	0.909090909091	0.0909090909091	2.0	2	1.0	0.1
pencil	0.5	0.5	0.988235294118	0.0117647058824	4.0	4	4.0	0.047619047619
eel	0.525467440361	0.474532559639	0.987450462351	0.0125495376486	25.46875	23	16.53125	0.210096153846
udder	0.529411764706	0.470588235294	0.909090909091	0.0909090909091	4.5	4	1.5	0.15
alum	0.54347826087	0.45652173913	0.7	0.3	3.57142857143	3	0.428571428571	0.183673469388
many	0.555555555556	0.444444444444	0.0	1.0	5.0	4	0.0	0.246913580247
temper	0.555555555556	0.444444444444	0.909090909091	0.0909090909091	2.5	2	2.5	0.25
joiner's saw	0.555555555556	0.444444444444	0.947368421053	0.0526315789474	2.5	2	1.5	0.0833333333333
bush	0.564516129032	0.435483870968	0.984725742517	0.0152742574829	23.3333333333	18	19.6666666667	0.305053191489
bone	0.565217391304	0.434782608696	0.886363636364	0.113636363636	6.5	5	1.5	0.192307692308
pot (s.)	0.571428571429	0.428571428571	0.375	0.625	1.33333333333	1	0.666666666667	1.11111111111
big earthenware jar/vessel	0.571428571429	0.428571428571	0.888888888889	0.111111111111	2.66666666667	2	1.33333333333	0.166666666667
flax yarn	0.571428571429	0.428571428571	0.923076923077	0.0769230769231	4.0	3	2.0	0.166666666667
y. girl	0.571428571429	0.428571428571	0.941176470588	0.0588235294118	2.66666666667	2	5.33333333333	0.333333333333
flat wooden bowl	0.571428571429	0.428571428571	0.943231441048	0.056768558952	8.0	6	4.0	0.240740740741
bolt	0.578947368421	0.421052631579	0.952380952381	0.047619047619	5.5	4	2.5	0.125
feeding trough	0.579617834395	0.420382165605	0.934065934066	0.0659340659341	8.27272727273	6	2.72727272727	0.192513368984
crow	0.581812147361	0.418187852639	0.878972116565	0.121027883435	50.0857142857	36	14.9142857143	2.05358554489
gadfly	0.588235294118	0.411764705882	0.947368421053	0.0526315789474	4.28571428571	3	1.71428571429	0.0952380952381
nanny goat (for breeding)	0.594202898551	0.405797101449	0.985401459854	0.014598540146	5.85714285714	4	5.14285714286	0.0761904761905
animal's child	0.6	0.4	0.0	1.0	3.0	2	0.0	0.24
hole	0.6	0.4	0.75	0.25	1.5	1	0.5	0.166666666667
arriving late	0.6	0.4	0.75	0.25	1.5	1	0.5	0.166666666667
cargo	0.6	0.4	0.75	0.25	1.5	1	0.5	0.166666666667
afternoon	0.6	0.4	0.75	0.25	1.5	1	0.5	0.166666666667
ship's freight	0.6	0.4	0.75	0.25	1.5	1	0.5	0.166666666667
having testicles	0.6	0.4	0.75	0.25	1.5	1	0.5	0.166666666667
screech owl	0.6	0.4	0.75	0.25	1.5	1	0.5	0.166666666667
sharp object	0.6	0.4	0.75	0.25	1.5	1	0.5	0.166666666667
flock of wool	0.6	0.4	0.75	0.25	1.5	1	0.5	0.166666666667
broth	0.6	0.4	0.857142857143	0.142857142857	1.5	1	1.5	0.25
y. heifer	0.6	0.4	0.857142857143	0.142857142857	1.5	1	1.5	0.25
m. (of sheep or goat)	0.6	0.4	0.857142857143	0.142857142857	1.5	1	1.5	0.25
gruel	0.6	0.4	0.857142857143	0.142857142857	1.5	1	1.5	0.25
spool	0.6	0.4	0.857142857143	0.142857142857	1.5	1	1.5	0.25
fluid (of plants)	0.6	0.4	0.857142857143	0.142857142857	1.5	1	1.5	0.25
bumblebee	0.6	0.4	0.857142857143	0.142857142857	1.5	1	1.5	0.25
cutter	0.6	0.4	0.909090909091	0.0909090909091	3.0	2	2.0	0.2
goat (1 year old)	0.6	0.4	0.947368421053	0.0526315789474	3.0	2	1.0	0.0555555555556
fem. fallow deer	0.6	0.4	0.952380952381	0.047619047619	6.0	4	4.0	0.2
steel	0.604395604396	0.395604395604	0.913043478261	0.0869565217391	9.16666666667	6	3.83333333333	0.365079365079
to flow	0.612903225806	0.387096774194	0.882352941176	0.117647058824	4.75	3	2.25	0.3
reed	0.616	0.384	0.950354609929	0.0496453900709	6.41666666667	4	5.58333333333	0.291666666667
apple	0.622597641707	0.377402358293	0.302292926696	0.697707073304	18.1466117216	11	36.8533882784	85.0594486549
potter?s wheel	0.625	0.375	0.666666666667	0.333333333333	3.33333333333	2	0.666666666667	0.333333333333
large long-shafted woodman?s axe	0.625	0.375	0.75	0.25	1.66666666667	1	0.333333333333	0.111111111111
chill	0.625	0.375	0.75	0.25	1.66666666667	1	0.333333333333	0.111111111111
kind of basket	0.625	0.375	0.75	0.25	1.66666666667	1	0.333333333333	0.111111111111
clay dishes	0.625	0.375	0.75	0.25	1.66666666667	1	0.333333333333	0.111111111111
fever	0.625	0.375	0.75	0.25	1.66666666667	1	0.333333333333	0.111111111111
hen (1-2 months old)	0.625	0.375	0.75	0.25	1.66666666667	1	0.333333333333	0.111111111111
oats (w.)s	0.625	0.375	0.857142857143	0.142857142857	3.33333333333	2	0.666666666667	0.111111111111
gen. bronze	0.625	0.375	0.983606557377	0.016393442623	5.0	3	2.0	0.0333333333333
round stone	0.625	0.375	0.985915492958	0.0140845070423	3.33333333333	2	4.66666666667	0.0666666666667
round, powerful animal	0.625	0.375	0.985915492958	0.0140845070423	3.33333333333	2	4.66666666667	0.0666666666667
strong y. man	0.625	0.375	0.985915492958	0.0140845070423	3.33333333333	2	4.66666666667	0.0666666666667
walnut	0.631578947368	0.368421052632	0.947368421053	0.0526315789474	5.14285714286	3	3.85714285714	0.214285714286
field bed	0.636363636364	0.363636363636	0.913043478261	0.0869565217391	3.5	2	1.5	0.142857142857
october	0.636363636364	0.363636363636	0.975609756098	0.0243902439024	3.5	2	2.5	0.0625
heap of stone	0.636363636364	0.363636363636	0.987012987013	0.012987012987	7.0	4	8.0	0.105263157895
candle	0.638477801268	0.361522198732	0.958801498127	0.0411985018727	15.8947368421	9	10.1052631579	0.434210526316
leopard esp. melanistic	0.640883977901	0.359116022099	0.822942643392	0.177057356608	8.92307692308	5	5.07692307692	1.09230769231
spun	0.641025641026	0.358974358974	0.909090909091	0.0909090909091	3.57142857143	2	1.42857142857	0.142857142857
road metal	0.647058823529	0.352941176471	0.965517241379	0.0344827586207	3.66666666667	2	1.33333333333	0.047619047619
winter	0.649425864551	0.350574135449	0.331450045804	0.668549954196	20.3771008403	11	42.6228991597	85.9723437714
blood	0.654867256637	0.345132743363	0.999091734787	0.000908265213442	24.6666666667	13	17.3333333333	0.0157575757576
razor	0.655172413793	0.344827586207	0.84388185654	0.15611814346	9.5	5	2.5	0.4625
salted	0.658536585366	0.341463414634	0.965517241379	0.0344827586207	3.85714285714	2	1.14285714286	0.0408163265306
bronze	0.664966194266	0.335033805734	0.966621752366	0.0333782476342	55.573655914	28	31.426344086	1.08517762255
beer	0.665243381725	0.334756618275	0.983323749281	0.0166762507188	13.9107142857	7	5.08928571429	0.0863095238095
roasted grain	0.666666666667	0.333333333333	0.0	1.0	4.0	2	0.0	0.222222222222
archer	0.666666666667	0.333333333333	0.0	1.0	2.0	1	0.0	0.222222222222
ox (with one testicle)	0.666666666667	0.333333333333	0.0	1.0	2.0	1	0.0	0.222222222222
to winnow	0.666666666667	0.333333333333	0.787878787879	0.212121212121	8.0	4	1.0	0.269230769231
to strew	0.666666666667	0.333333333333	0.85626911315	0.14373088685	8.0	4	4.0	0.671428571429
steading	0.666666666667	0.333333333333	0.857142857143	0.142857142857	2.0	1	1.0	0.166666666667
stone (piece)	0.666666666667	0.333333333333	0.857142857143	0.142857142857	2.0	1	1.0	0.166666666667
part of a knitting machine	0.666666666667	0.333333333333	0.857142857143	0.142857142857	2.0	1	1.0	0.166666666667
bar	0.666666666667	0.333333333333	0.888888888889	0.111111111111	2.0	1	2.0	0.25
threshing floor	0.666666666667	0.333333333333	0.888888888889	0.111111111111	2.0	1	2.0	0.25
to be dry	0.666666666667	0.333333333333	0.888888888889	0.111111111111	2.0	1	2.0	0.25
mixture	0.666666666667	0.333333333333	0.888888888889	0.111111111111	2.0	1	1.0	0.125
blending	0.666666666667	0.333333333333	0.888888888889	0.111111111111	2.0	1	1.0	0.125
mixing	0.666666666667	0.333333333333	0.888888888889	0.111111111111	2.0	1	1.0	0.125
bricklayer's tool	0.666666666667	0.333333333333	0.913043478261	0.0869565217391	4.0	2	1.0	0.0952380952381
owl	0.675333801827	0.324666198173	0.254514915898	0.745485084102	22.880952381	11	22.119047619	64.7876373626
oat	0.684210526316	0.315789473684	0.141176470588	0.858823529412	4.33333333333	2	0.666666666667	4.05555555556
vulture	0.684210526316	0.315789473684	0.804469273743	0.195530726257	6.5	3	1.5	0.364583333333
large knife	0.684210526316	0.315789473684	0.923076923077	0.0769230769231	4.33333333333	2	2.66666666667	0.222222222222
goose	0.686274509804	0.313725490196	0.808729139923	0.191270860077	17.5	8	2.5	0.59126984127
army	0.689208633094	0.310791366906	0.360285350794	0.639714649206	6.65277777778	3	8.34722222222	14.8211419753
to spring	0.690155440415	0.309844559585	0.999581239531	0.000418760469012	28.9565217391	13	35.0434782609	0.0146809712027
hair in horse tail	0.697247706422	0.302752293578	0.916666666667	0.0833333333333	6.90909090909	3	1.09090909091	0.099173553719
to hoe	0.698113207547	0.301886792453	0.945378151261	0.0546218487395	9.25	4	3.75	0.216666666667
to curve	0.698643897539	0.301356102461	0.993879191062	0.00612080893771	23.1833333333	10	11.8166666667	0.0727729885057
hair	0.698775584875	0.301224415125	0.978415277724	0.0215847222757	90.4715768103	39	38.5284231897	0.84997171774
belly	0.7	0.3	0.888888888889	0.111111111111	2.33333333333	1	0.666666666667	0.0833333333333
joint	0.7	0.3	0.888888888889	0.111111111111	2.33333333333	1	0.666666666667	0.0833333333333
ice axe	0.7	0.3	0.888888888889	0.111111111111	2.33333333333	1	0.666666666667	0.0833333333333
carpenter?s axe	0.7	0.3	0.888888888889	0.111111111111	2.33333333333	1	0.666666666667	0.0833333333333
pair of draft animals	0.7	0.3	0.888888888889	0.111111111111	2.33333333333	1	0.666666666667	0.0833333333333
yoke of cattle	0.7	0.3	0.888888888889	0.111111111111	2.33333333333	1	0.666666666667	0.0833333333333
firing spear	0.7	0.3	0.941176470588	0.0588235294118	4.66666666667	2	1.33333333333	0.0833333333333
green	0.7	0.3	0.943396226415	0.0566037735849	4.66666666667	2	3.33333333333	0.2
root	0.701754385965	0.298245614035	0.997810743694	0.00218925630637	37.6470588235	16	15.3529411765	0.0336852689794
whale	0.701863354037	0.298136645963	0.905737704918	0.094262295082	18.8333333333	8	3.16666666667	0.329562594268
black bee	0.703703703704	0.296296296296	0.882352941176	0.117647058824	4.75	2	2.25	0.3
to sustain	0.703703703704	0.296296296296	0.9375	0.0625	7.125	3	1.875	0.125
frozen	0.703703703704	0.296296296296	0.975609756098	0.0243902439024	4.75	2	1.25	0.03125
couch grass	0.707207207207	0.292792792793	0.99716713881	0.0028328611898	12.0769230769	5	4.92307692308	0.013986013986
boat	0.707317073171	0.292682926829	0.948616600791	0.0513833992095	9.66666666667	4	3.33333333333	0.180555555556
adze	0.708351090607	0.291648909393	0.98642720065	0.0135727993505	97.1512071939	40	57.8487928061	0.795973648038
to jump	0.708860759494	0.291139240506	0.999581239531	0.000418760469012	31.652173913	13	32.347826087	0.0135516657256
wedge	0.709677419355	0.290322580645	0.98064516129	0.0193548387097	14.6666666667	6	6.33333333333	0.125
hose	0.710526315789	0.289473684211	0.93023255814	0.0697674418605	12.2727272727	5	2.72727272727	0.204545454545
spindle	0.711798258781	0.288201741219	0.963005811253	0.0369941887466	49.3958333333	20	19.6041666667	0.753100587152
falcon	0.714285714286	0.285714285714	0.666666666667	0.333333333333	2.5	1	0.5	0.25
hand	0.714285714286	0.285714285714	0.884210526316	0.115789473684	5.0	2	3.0	0.392857142857
cattle-shed	0.714285714286	0.285714285714	0.923076923077	0.0769230769231	5.0	2	2.0	0.166666666667
cow-house	0.714285714286	0.285714285714	0.923076923077	0.0769230769231	5.0	2	2.0	0.166666666667
fleshy side of a hide	0.714285714286	0.285714285714	0.933333333333	0.0666666666667	5.0	2	2.0	0.142857142857
laid waste	0.714285714286	0.285714285714	0.9375	0.0625	2.5	1	1.5	0.1
blind	0.714285714286	0.285714285714	0.9375	0.0625	2.5	1	1.5	0.1
draft	0.714285714286	0.285714285714	0.9375	0.0625	2.5	1	1.5	0.1
line of scythed grass or grain	0.714285714286	0.285714285714	0.9375	0.0625	2.5	1	1.5	0.1
(adj.) annual	0.714285714286	0.285714285714	0.9375	0.0625	2.5	1	1.5	0.1
annual	0.714285714286	0.285714285714	0.9375	0.0625	2.5	1	1.5	0.1
castrated cock	0.714285714286	0.285714285714	0.9375	0.0625	2.5	1	1.5	0.1
swath	0.714285714286	0.285714285714	0.9375	0.0625	2.5	1	1.5	0.1
trajectory	0.714285714286	0.285714285714	0.9375	0.0625	2.5	1	1.5	0.1
destruction	0.714285714286	0.285714285714	0.9375	0.0625	2.5	1	1.5	0.1
horse (uncastrated	0.714285714286	0.285714285714	0.941176470588	0.0588235294118	5.0	2	1.0	0.0625
make	0.714285714286	0.285714285714	0.957446808511	0.0425531914894	5.0	2	2.0	0.0888888888889
do	0.714285714286	0.285714285714	0.957446808511	0.0425531914894	5.0	2	2.0	0.0888888888889
sty (in the eye)	0.716216216216	0.283783783784	0.611111111111	0.388888888889	7.57142857143	3	0.428571428571	0.272727272727
freeze	0.720930232558	0.279069767442	0.769230769231	0.230769230769	10.3333333333	4	0.666666666667	0.2
little dog	0.722222222222	0.277777777778	0.8	0.2	5.2	2	0.8	0.2
wooden spoon	0.72268907563	0.27731092437	0.981132075472	0.0188679245283	7.81818181818	3	2.18181818182	0.041958041958
donkey foal	0.723502304147	0.276497695853	0.802325581395	0.197674418605	7.85	3	1.15	0.283333333333
uncastrated	0.724137931034	0.275862068966	0.876826722338	0.123173277662	10.5	4	3.5	0.491666666667
billy goat	0.724137931034	0.275862068966	0.896391152503	0.103608847497	10.5	4	2.5	0.288961038961
shovel	0.724315584764	0.275684415236	0.954764111721	0.0452358882786	86.7020875182	33	27.2979124818	1.29335121011
(cross)-bow	0.727272727273	0.272727272727	0.666666666667	0.333333333333	2.66666666667	1	0.333333333333	0.166666666667
skimmed milk	0.727272727273	0.272727272727	0.666666666667	0.333333333333	2.66666666667	1	0.333333333333	0.166666666667
sedge	0.727272727273	0.272727272727	0.666666666667	0.333333333333	2.66666666667	1	0.333333333333	0.166666666667
rough wool	0.727272727273	0.272727272727	0.888888888889	0.111111111111	2.66666666667	1	1.33333333333	0.166666666667
to swell	0.727272727273	0.272727272727	0.888888888889	0.111111111111	2.66666666667	1	1.33333333333	0.166666666667
fem. animal	0.727272727273	0.272727272727	0.888888888889	0.111111111111	2.66666666667	1	1.33333333333	0.166666666667
fem. of any animal	0.727272727273	0.272727272727	0.888888888889	0.111111111111	2.66666666667	1	1.33333333333	0.166666666667
year-old fem. sheep	0.727272727273	0.272727272727	0.981132075472	0.0188679245283	8.0	3	2.0	0.0384615384615
millet	0.728129050843	0.271870949157	0.949256187105	0.0507438128953	58.9207459207	22	17.0792540793	0.912995337995
salt	0.728675274502	0.271324725498	0.309969841147	0.690030158853	13.4281030445	5	32.5718969555	72.5089613466
horseradish	0.728813559322	0.271186440678	0.995744680851	0.00425531914894	10.75	4	3.25	0.0138888888889
linen	0.730204778157	0.269795221843	0.912368873845	0.0876311261546	83.9019607843	31	24.0980392157	2.31456637236
shrub	0.730612244898	0.269387755102	0.994159862858	0.00584013714153	29.8333333333	11	15.1666666667	0.0890957446809
manganese	0.730769230769	0.269230769231	0.8	0.2	5.42857142857	2	0.571428571429	0.142857142857
m. goat	0.73165713334	0.26834286666	0.986971331749	0.0130286682508	111.789602758	41	33.2103972416	0.438399003313
hare / rabbit	0.731707317073	0.268292682927	0.144736842105	0.855263157895	2.72727272727	1	1.27272727273	7.52066115702
tallow	0.733317650115	0.266682349885	0.978322119973	0.0216778800273	126.489855515	46	50.5101444851	1.11921506216
propolis	0.733333333333	0.266666666667	0.666666666667	0.333333333333	2.75	1	0.25	0.125
turkey	0.733333333333	0.266666666667	0.666666666667	0.333333333333	2.75	1	0.25	0.125
hoopoe	0.733333333333	0.266666666667	0.666666666667	0.333333333333	2.75	1	0.25	0.125
worker bee	0.733333333333	0.266666666667	0.666666666667	0.333333333333	2.75	1	0.25	0.125
mineral salted water	0.733333333333	0.266666666667	0.8	0.2	5.5	2	0.5	0.125
way	0.73715651135	0.26284348865	0.991983967936	0.00801603206413	30.85	11	18.15	0.146666666667
road	0.73715651135	0.26284348865	0.991983967936	0.00801603206413	30.85	11	18.15	0.146666666667
Leo (constellation)	0.739130434783	0.260869565217	0.817518248175	0.182481751825	11.3333333333	4	2.66666666667	0.595238095238
buffalo (young	0.739130434783	0.260869565217	0.981818181818	0.0181818181818	5.66666666667	2	1.33333333333	0.0246913580247
bee (m.)	0.74025974026	0.25974025974	0.277087033748	0.722912966252	5.7	2	1.3	3.39166666667
honey	0.7415678282	0.2584321718	0.346157816386	0.653842183614	83.2151309492	29	37.7848690508	71.3701673579
path	0.742027946972	0.257972053028	0.989727380482	0.010272619518	34.5166666667	12	19.4833333333	0.202222222222
copper	0.743487461835	0.256512538165	0.421946199004	0.578053800996	55.0704533817	19	59.9295466183	82.101704664
giant	0.743954480797	0.256045519203	0.897683397683	0.102316602317	11.6222222222	4	1.37777777778	0.157037037037
pig (f.	0.745454545455	0.254545454545	0.923076923077	0.0769230769231	5.85714285714	2	1.14285714286	0.0952380952381
mother)	0.745454545455	0.254545454545	0.923076923077	0.0769230769231	5.85714285714	2	1.14285714286	0.0952380952381
to slaughter sheep	0.745454545455	0.254545454545	0.923076923077	0.0769230769231	5.85714285714	2	1.14285714286	0.0952380952381
fox	0.747676167389	0.252323832611	0.318015921466	0.681984078534	44.4474166185	15	49.5525833815	106.265349108
to become like copper	0.75	0.25	0.0	1.0	3.0	1	0.0	0.375
vinegar	0.75	0.25	0.0	1.0	9.0	3	0.0	0.225
iron fish-fork	0.75	0.25	0.0	1.0	3.0	1	0.0	0.1875
big hammer	0.75	0.25	0.888888888889	0.111111111111	3.0	1	1.0	0.125
pot-bellied broad-lipped clay jar	0.75	0.25	0.888888888889	0.111111111111	3.0	1	1.0	0.125
testicles	0.75	0.25	0.888888888889	0.111111111111	3.0	1	1.0	0.125
egg	0.75	0.25	0.888888888889	0.111111111111	3.0	1	1.0	0.125
big iron hammer	0.75	0.25	0.888888888889	0.111111111111	3.0	1	1.0	0.125
wooden vessel	0.75	0.25	0.888888888889	0.111111111111	3.0	1	1.0	0.125
s. dog	0.75	0.25	0.923076923077	0.0769230769231	3.0	1	3.0	0.25
fem. dog	0.75	0.25	0.923076923077	0.0769230769231	3.0	1	3.0	0.25
young of an animal	0.75	0.25	0.923076923077	0.0769230769231	3.0	1	3.0	0.25
y. dog	0.75	0.25	0.923076923077	0.0769230769231	3.0	1	3.0	0.25
object made of gold	0.75	0.25	0.9375	0.0625	3.0	1	1.0	0.0666666666667
object made of brass	0.75	0.25	0.9375	0.0625	3.0	1	1.0	0.0666666666667
soft material	0.75	0.25	0.9375	0.0625	3.0	1	1.0	0.0666666666667
cobweb	0.75	0.25	0.941176470588	0.0588235294118	6.0	2	2.0	0.125
long-handled wine ladle	0.75	0.25	0.947368421053	0.0526315789474	6.0	2	3.0	0.166666666667
rice	0.75	0.25	0.96	0.04	9.0	3	3.0	0.125
porridge	0.75	0.25	0.96	0.04	9.0	3	3.0	0.125
means of life	0.75	0.25	0.96	0.04	3.0	1	2.0	0.0833333333333
a constellation	0.75	0.25	0.96	0.04	3.0	1	2.0	0.0833333333333
to live	0.75	0.25	0.96	0.04	3.0	1	2.0	0.0833333333333
sustenance	0.75	0.25	0.96	0.04	3.0	1	2.0	0.0833333333333
equipage	0.75	0.25	0.96	0.04	3.0	1	2.0	0.0833333333333
pipe	0.75	0.25	0.979591836735	0.0204081632653	6.0	2	4.0	0.0833333333333
squeeze of cheese	0.75	0.25	0.986842105263	0.0131578947368	9.0	3	3.0	0.04
remains after melting wax	0.75	0.25	0.986842105263	0.0131578947368	9.0	3	3.0	0.04
rotation	0.752577319588	0.247422680412	0.921052631579	0.0789473684211	9.125	3	1.875	0.160714285714
to strangle	0.754098360656	0.245901639344	0.995901639344	0.00409836065574	30.6666666667	10	13.3333333333	0.0548696844993
milk food	0.754385964912	0.245614035088	0.870967741935	0.129032258065	6.14285714286	2	0.857142857143	0.126984126984
kibbled maize	0.75625	0.24375	0.847826086957	0.152173913043	9.30769230769	3	0.692307692308	0.12426035503
door	0.757575757576	0.242424242424	0.985915492958	0.0140845070423	6.25	2	1.75	0.025
work	0.758389261745	0.241610738255	0.98307379824	0.0169262017603	18.8333333333	6	20.1666666667	0.347222222222
child	0.76	0.24	0.980198019802	0.019801980198	9.5	3	5.5	0.111111111111
milk	0.760974637561	0.239025362439	0.342500775559	0.657499224441	44.5711903422	14	43.4288096578	83.3703474739
tree	0.761113664268	0.238886335732	0.98900966648	0.01099033352	210.282022568	66	103.717977432	1.15256220705
a kind of copper dish	0.761904761905	0.238095238095	0.888888888889	0.111111111111	3.2	1	0.8	0.1
bellows	0.764075067024	0.235924932976	0.998230088496	0.00176991150442	25.9090909091	8	13.0909090909	0.0232108317215
fat	0.764700515082	0.235299484918	0.897695474827	0.102304525173	298.991081141	92	125.008918859	14.2464548891
stitch	0.764705882353	0.235294117647	0.154639175258	0.845360824742	6.5	2	0.5	2.73333333333
jenny (donkey)	0.764705882353	0.235294117647	0.878048780488	0.121951219512	6.5	2	1.5	0.208333333333
to sift	0.764705882353	0.235294117647	0.9375	0.0625	3.25	1	0.75	0.05
bumble-bee	0.764705882353	0.235294117647	0.9375	0.0625	3.25	1	0.75	0.05
panic grass	0.764705882353	0.235294117647	0.983193277311	0.0168067226891	6.5	2	4.5	0.0769230769231
bird	0.765329295988	0.234670704012	0.94227618323	0.0577238167699	101.1	31	6.9	0.422693837328
autumn / harvest	0.765402843602	0.234597156398	0.210100365269	0.789899634731	9.78787878788	3	3.21212121212	12.0763872491
calf (overwintered)	0.767441860465	0.232558139535	0.985915492958	0.0140845070423	6.6	2	1.4	0.02
deer, esp. fallow deer	0.769230769231	0.230769230769	0.612244897959	0.387755102041	3.33333333333	1	1.66666666667	1.05555555556
pervade	0.769230769231	0.230769230769	0.833333333333	0.166666666667	3.33333333333	1	0.666666666667	0.133333333333
to perforate	0.769230769231	0.230769230769	0.833333333333	0.166666666667	3.33333333333	1	0.666666666667	0.133333333333
double	0.769230769231	0.230769230769	0.833333333333	0.166666666667	3.33333333333	1	0.666666666667	0.133333333333
pierce	0.769230769231	0.230769230769	0.833333333333	0.166666666667	3.33333333333	1	0.666666666667	0.133333333333
farrow sow or pig	0.769230769231	0.230769230769	0.833333333333	0.166666666667	3.33333333333	1	0.666666666667	0.133333333333
to dig up	0.769230769231	0.230769230769	0.833333333333	0.166666666667	3.33333333333	1	0.666666666667	0.133333333333
gold	0.769379685795	0.230620314205	0.214983016976	0.785016983024	30.0251831502	9	19.9748168498	72.938647343
eagle	0.77032610405	0.22967389595	0.146285093734	0.853714906266	30.1859943978	9	14.8140056022	86.454040404
skin	0.77069623191	0.22930376809	0.986629314811	0.0133706851886	241.993967912	72	90.0060320876	1.21975122982
breast	0.770804911323	0.229195088677	0.936277537575	0.0637224624254	23.5416666667	7	4.45833333333	0.303431372549
tubing	0.770833333333	0.229166666667	0.939597315436	0.0604026845638	13.4545454545	4	2.54545454545	0.163636363636
-	0.771117166213	0.228882833787	0.971045313267	0.0289546867332	10.1071428571	3	1.89285714286	0.0564413265306
vulva	0.771428571429	0.228571428571	0.943396226415	0.0566037735849	6.75	2	1.25	0.075
big	0.772727272727	0.227272727273	0.9375	0.0625	3.4	1	0.6	0.04
to peep	0.772727272727	0.227272727273	0.9375	0.0625	3.4	1	0.6	0.04
unripe	0.773156899811	0.226843100189	0.96588990206	0.0341100979399	17.0416666667	5	5.95833333333	0.210416666667
ray	0.77399103139	0.22600896861	0.994145217546	0.00585478245352	41.0952380952	12	24.9047619048	0.14667068798
navel	0.777619387028	0.222380612972	0.959530959531	0.040469040469	41.9615384615	12	7.03846153846	0.296853146853
to sew (together)	0.777777777778	0.222222222222	0.263157894737	0.736842105263	3.5	1	0.5	1.4
moulder	0.777777777778	0.222222222222	0.625	0.375	3.5	1	0.5	0.3
dove	0.777777777778	0.222222222222	0.75	0.25	7.0	2	1.0	0.333333333333
butterfly	0.777777777778	0.222222222222	0.833333333333	0.166666666667	3.5	1	0.5	0.1
born late (of fruit,animals,lamb)	0.777777777778	0.222222222222	0.833333333333	0.166666666667	3.5	1	0.5	0.1
fly (v)	0.777777777778	0.222222222222	0.833333333333	0.166666666667	3.5	1	0.5	0.1
to stab	0.777777777778	0.222222222222	0.897959183673	0.102040816327	7.0	2	2.0	0.227272727273
to stick	0.777777777778	0.222222222222	0.897959183673	0.102040816327	7.0	2	2.0	0.227272727273
unmarked	0.777777777778	0.222222222222	0.9	0.1	3.5	1	1.5	0.166666666667
uncoined	0.777777777778	0.222222222222	0.9	0.1	3.5	1	1.5	0.166666666667
to overcome	0.777777777778	0.222222222222	0.909090909091	0.0909090909091	7.0	2	1.0	0.1
eyelash	0.777777777778	0.222222222222	0.95652173913	0.0434782608696	7.0	2	2.0	0.0909090909091
distribute	0.777777777778	0.222222222222	0.972222222222	0.0277777777778	3.5	1	2.5	0.0714285714286
to spread out	0.777777777778	0.222222222222	0.972222222222	0.0277777777778	3.5	1	2.5	0.0714285714286
to seed	0.777777777778	0.222222222222	0.972222222222	0.0277777777778	3.5	1	2.5	0.0714285714286
m. w. boar	0.777777777778	0.222222222222	0.972222222222	0.0277777777778	3.5	1	2.5	0.0714285714286
scatter	0.777777777778	0.222222222222	0.972222222222	0.0277777777778	3.5	1	2.5	0.0714285714286
m. (domestic) swine	0.777777777778	0.222222222222	0.972222222222	0.0277777777778	3.5	1	2.5	0.0714285714286
tatter	0.78	0.22	0.962962962963	0.037037037037	10.6363636364	3	2.36363636364	0.0909090909091
species of white grape	0.78125	0.21875	0.952380952381	0.047619047619	7.14285714286	2	2.85714285714	0.142857142857
chickpea	0.78125	0.21875	0.952380952381	0.047619047619	7.14285714286	2	2.85714285714	0.142857142857
whey	0.781332828474	0.218667171526	0.932228059168	0.0677719408317	35.7316017316	10	7.2683982684	0.52840445269
beer made from hops	0.781818181818	0.218181818182	0.583333333333	0.416666666667	10.75	3	0.25	0.178571428571
m. camel	0.782608695652	0.217391304348	0.833333333333	0.166666666667	3.6	1	0.4	0.08
duck	0.782839069403	0.217160930597	0.264611035892	0.735388964108	43.2585585586	12	22.7414414414	63.2014647749
placenta	0.783505154639	0.216494845361	0.974358974359	0.025641025641	10.8571428571	3	8.14285714286	0.214285714286
nation	0.783783783784	0.216216216216	0.857142857143	0.142857142857	7.25	2	0.75	0.125
wheat species	0.783783783784	0.216216216216	0.857142857143	0.142857142857	7.25	2	0.75	0.125
elk, moose	0.783923941227	0.216076058773	0.989335520919	0.0106644790812	72.56	20	21.44	0.231111111111
sow	0.784171860705	0.215828139295	0.872056731454	0.127943268546	283.398658465	78	86.6013415352	12.7056627131
raw	0.784688995215	0.215311004785	0.999174236168	0.000825763831544	32.8	9	13.2	0.0109090909091
grain (gen.)	0.785714285714	0.214285714286	0.545454545455	0.454545454545	3.66666666667	1	1.33333333333	1.11111111111
to dive	0.785714285714	0.214285714286	0.625	0.375	3.66666666667	1	0.333333333333	0.2
to clean	0.785714285714	0.214285714286	0.625	0.375	3.66666666667	1	0.333333333333	0.2
to wipe	0.785714285714	0.214285714286	0.625	0.375	3.66666666667	1	0.333333333333	0.2
to duck	0.785714285714	0.214285714286	0.625	0.375	3.66666666667	1	0.333333333333	0.2
to pile up earth	0.785714285714	0.214285714286	0.96	0.04	3.66666666667	1	1.33333333333	0.0555555555556
little hammer	0.785714285714	0.214285714286	0.96	0.04	3.66666666667	1	1.33333333333	0.0555555555556
track	0.785714285714	0.214285714286	0.96	0.04	3.66666666667	1	1.33333333333	0.0555555555556
s. hammer	0.785714285714	0.214285714286	0.96	0.04	3.66666666667	1	1.33333333333	0.0555555555556
(formerly) elk	0.785714285714	0.214285714286	0.96	0.04	3.66666666667	1	1.33333333333	0.0555555555556
to trace a furrow	0.785714285714	0.214285714286	0.96	0.04	3.66666666667	1	1.33333333333	0.0555555555556
compass	0.786259541985	0.213740458015	0.988538681948	0.0114613180516	14.7142857143	4	4.28571428571	0.0496894409938
to skin	0.787162162162	0.212837837838	0.972507636768	0.0274923632324	22.1904761905	6	9.80952380952	0.27731092437
mare	0.78726166833	0.21273833167	0.928682874397	0.0713171256025	148.024413306	40	25.975586694	1.99476509143
rock	0.788313885395	0.211686114605	0.959034357593	0.0409656424073	227.1625	61	71.8375	3.0685755032
bitch	0.788768871202	0.211231128798	0.919849740133	0.0801502598672	82.1513157895	22	14.8486842105	1.29382642212
male	0.789110429448	0.210889570552	0.998549523415	0.00145047658516	41.16	11	26.84	0.0389873417722
flesh	0.789292251895	0.210707748105	0.958647790449	0.0413522095512	191.041407867	51	39.9585921325	1.72365293249
bison calf	0.789473684211	0.210526315789	0.909090909091	0.0909090909091	3.75	1	1.25	0.125
unmarried	0.789473684211	0.210526315789	0.909090909091	0.0909090909091	3.75	1	1.25	0.125
young girl	0.789473684211	0.210526315789	0.909090909091	0.0909090909091	3.75	1	1.25	0.125
slave	0.789473684211	0.210526315789	0.909090909091	0.0909090909091	3.75	1	1.25	0.125
boy	0.789473684211	0.210526315789	0.909090909091	0.0909090909091	3.75	1	1.25	0.125
horned owl	0.790174854288	0.209825145712	0.955034832172	0.0449651678277	26.3611111111	7	5.63888888889	0.265491452991
space	0.790697674419	0.209302325581	0.941176470588	0.0588235294118	11.3333333333	3	6.66666666667	0.416666666667
to tie up	0.791304347826	0.208695652174	0.984067478913	0.0159325210872	22.75	6	6.25	0.10119047619
arable rocky ground	0.791666666667	0.208333333333	0.625	0.375	3.8	1	0.2	0.12
brass	0.792082528225	0.207917471775	0.929253827872	0.0707461721281	76.1920122888	20	21.8079877112	1.66029087652
fem.	0.793893129771	0.206106870229	0.871134020619	0.128865979381	11.5555555556	3	1.44444444444	0.213675213675
to spin	0.794365312533	0.205634687467	0.787444918965	0.212555081035	135.20474722	35	26.7952527801	7.232845103
ram (for slaughter)	0.794736842105	0.205263157895	0.932038834951	0.0679611650485	11.6153846154	3	1.38461538462	0.100961538462
rabbit	0.795105293113	0.204894706887	0.377552932359	0.622447067641	46.5666666667	12	13.4333333333	22.1466666667
crumb	0.795918367347	0.204081632653	0.936170212766	0.063829787234	7.8	2	2.2	0.15
woolly/golden threads	0.796116504854	0.203883495146	0.932038834951	0.0679611650485	11.7142857143	3	1.28571428571	0.09375
bread	0.796326032238	0.203673967762	0.901258373918	0.098741626082	113.384421134	29	18.6155788656	2.03951783511
gravel	0.796610169492	0.203389830508	0.998162609095	0.00183739090492	31.3333333333	8	13.6666666667	0.0251572327044
dew	0.79754601227	0.20245398773	0.957746478873	0.0422535211268	11.8181818182	3	2.18181818182	0.096256684492
crust	0.799363057325	0.200636942675	0.989847715736	0.010152284264	27.8888888889	7	10.1111111111	0.103703703704
(black) raven	0.8	0.2	0.0	1.0	4.0	1	0.0	1.33333333333
instigate	0.8	0.2	0.0	1.0	4.0	1	0.0	0.4
hen not yet in lay (2-5 months old)	0.8	0.2	0.0	1.0	4.0	1	0.0	0.16
rye (plant and grain)	0.8	0.2	0.461538461538	0.538461538462	4.0	1	1.0	1.16666666667
rye (plant)	0.8	0.2	0.461538461538	0.538461538462	4.0	1	1.0	1.16666666667
first time	0.8	0.2	0.9	0.1	4.0	1	1.0	0.111111111111
largest part of an object	0.8	0.2	0.9	0.1	4.0	1	1.0	0.111111111111
yield of a crop	0.8	0.2	0.9	0.1	4.0	1	1.0	0.111111111111
horsefly	0.8	0.2	0.9	0.1	4.0	1	1.0	0.111111111111
head (anatomic)	0.8	0.2	0.9	0.1	4.0	1	1.0	0.111111111111
sting fly	0.8	0.2	0.9	0.1	4.0	1	1.0	0.111111111111
young	0.8	0.2	0.9	0.1	4.0	1	1.0	0.111111111111
(by metaphor) youth	0.8	0.2	0.9	0.1	4.0	1	1.0	0.111111111111
(by extension) temperature and vegetation of this season	0.8	0.2	0.9	0.1	4.0	1	1.0	0.111111111111
skull	0.8	0.2	0.9	0.1	4.0	1	1.0	0.111111111111
driving of cattle	0.8	0.2	0.909090909091	0.0909090909091	4.0	1	1.0	0.1
flock (of cattle)	0.8	0.2	0.909090909091	0.0909090909091	4.0	1	1.0	0.1
(iron) toughness	0.8	0.2	0.933333333333	0.0666666666667	4.0	1	2.0	0.142857142857
sledge-hammer	0.8	0.2	0.933333333333	0.0666666666667	4.0	1	2.0	0.142857142857
iron weapon	0.8	0.2	0.933333333333	0.0666666666667	4.0	1	2.0	0.142857142857
lump-hammer	0.8	0.2	0.933333333333	0.0666666666667	4.0	1	2.0	0.142857142857
weeding-hoe	0.8	0.2	0.933333333333	0.0666666666667	4.0	1	2.0	0.142857142857
silk brocade	0.8	0.2	0.952380952381	0.047619047619	8.0	2	2.0	0.1
carpet	0.8	0.2	0.952380952381	0.047619047619	8.0	2	2.0	0.1
knitted	0.8	0.2	0.952380952381	0.047619047619	8.0	2	2.0	0.1
thick branch	0.8	0.2	0.952380952381	0.047619047619	8.0	2	2.0	0.1
course	0.8	0.2	0.96	0.04	4.0	1	1.0	0.0416666666667
felloe	0.8	0.2	0.96	0.04	4.0	1	1.0	0.0416666666667
tooth (general)	0.8	0.2	0.96	0.04	4.0	1	1.0	0.0416666666667
bow-saw	0.8	0.2	0.96	0.04	4.0	1	1.0	0.0416666666667
ale	0.8	0.2	0.99604743083	0.00395256916996	12.0	3	3.0	0.0119047619048
field for cultivation	0.800829875519	0.199170124481	0.909090909091	0.0909090909091	12.0625	3	0.9375	0.09375
period of heavy rains	0.801801801802	0.198198198198	0.932203389831	0.0677966101695	8.09090909091	2	0.909090909091	0.0661157024793
hail	0.801801801802	0.198198198198	0.932203389831	0.0677966101695	8.09090909091	2	0.909090909091	0.0661157024793
cream	0.802197802198	0.197802197802	0.909647779479	0.0903522205207	12.1666666667	3	1.83333333333	0.182098765432
furrier	0.804034582133	0.195965417867	0.969348659004	0.0306513409962	16.4117647059	4	2.58823529412	0.0818414322251
to turn bitter	0.80487804878	0.19512195122	0.99604743083	0.00395256916996	12.375	3	2.625	0.0104166666667
valley	0.805194805195	0.194805194805	0.997963340122	0.0020366598778	20.6666666667	5	9.33333333333	0.0190476190476
earthenware jug	0.806451612903	0.193548387097	0.909090909091	0.0909090909091	4.16666666667	1	0.833333333333	0.0833333333333
earthenware jug with narrow mouth	0.806451612903	0.193548387097	0.909090909091	0.0909090909091	4.16666666667	1	0.833333333333	0.0833333333333
honeycomb	0.80703125	0.19296875	0.958594075928	0.0414059240718	29.2753036437	7	5.72469635628	0.247274992214
field	0.808279331025	0.191720668975	0.940032299868	0.0599677001319	375.217032393	89	115.782967607	7.38616990376
originally grain destined for grinding	0.808510638298	0.191489361702	0.984848484848	0.0151515151515	12.6666666667	3	4.33333333333	0.0666666666667
wheat originally grain destined for grinding	0.808510638298	0.191489361702	0.984848484848	0.0151515151515	12.6666666667	3	4.33333333333	0.0666666666667
eagle-owl	0.808955223881	0.191044776119	0.932320441989	0.067679558011	33.875	8	3.125	0.226851851852
sharp knife	0.809523809524	0.190476190476	0.9	0.1	4.25	1	0.75	0.0833333333333
mountain	0.809893461127	0.190106538873	0.995571054547	0.00442894545337	85.2041666667	20	21.7958333333	0.096961996337
bark	0.810236078573	0.189763921427	0.986616793374	0.013383206626	38.4273504274	9	11.5726495726	0.15698005698
thick fur	0.810810810811	0.189189189189	0.995633187773	0.00436681222707	12.8571428571	3	8.14285714286	0.0357142857143
thick wool	0.810810810811	0.189189189189	0.995633187773	0.00436681222707	12.8571428571	3	8.14285714286	0.0357142857143
thick hair	0.810810810811	0.189189189189	0.995633187773	0.00436681222707	12.8571428571	3	8.14285714286	0.0357142857143
the coldest season of the year	0.811965811966	0.188034188034	0.758620689655	0.241379310345	8.63636363636	2	0.363636363636	0.115702479339
substance	0.8125	0.1875	0.8	0.2	4.33333333333	1	0.666666666667	0.166666666667
mother	0.8125	0.1875	0.8	0.2	4.33333333333	1	0.666666666667	0.166666666667
any w. animal of the dog species	0.8125	0.1875	0.8	0.2	4.33333333333	1	0.666666666667	0.166666666667
of a hundred	0.8125	0.1875	0.8	0.2	4.33333333333	1	0.666666666667	0.166666666667
hundred	0.8125	0.1875	0.8	0.2	4.33333333333	1	0.666666666667	0.166666666667
double-headed axe	0.8125	0.1875	0.8	0.2	4.33333333333	1	0.666666666667	0.166666666667
sheep (f.)	0.8125	0.1875	0.96	0.04	4.33333333333	1	0.666666666667	0.0277777777778
to scatter	0.8125	0.1875	0.97498396408	0.0250160359205	13.0	3	8.0	0.205263157895
mangy	0.813333333333	0.186666666667	0.990825688073	0.00917431192661	8.71428571429	2	1.28571428571	0.0119047619048
black grouse	0.814814814815	0.185185185185	0.578947368421	0.421052631579	8.8	2	0.2	0.145454545455
colourful	0.814814814815	0.185185185185	0.9	0.1	4.4	1	0.6	0.0666666666667
pig (big)	0.814814814815	0.185185185185	0.9	0.1	4.4	1	0.6	0.0666666666667
grave	0.815985130112	0.184014869888	0.984727410279	0.0152725897206	39.9090909091	9	8.09090909091	0.125485625486
drake	0.816326530612	0.183673469388	0.880733944954	0.119266055046	13.3333333333	3	2.66666666667	0.361111111111
roe deer	0.81730453928	0.18269546072	0.966163426913	0.0338365730872	156.575641026	35	32.4243589744	1.13555239381
spring	0.817436171446	0.182563828554	0.489069584551	0.510930415449	134.326089333	30	91.6739106669	95.7716258431
tax	0.817805137919	0.182194862081	0.995539353264	0.00446064673581	53.8635477583	12	18.1364522417	0.0812627910951
rabbit (dial.)	0.818181818182	0.181818181818	0.3	0.7	4.5	1	0.5	1.16666666667
duck (m.)	0.818181818182	0.181818181818	0.315789473684	0.684210526316	4.5	1	0.5	1.08333333333
spotted	0.818181818182	0.181818181818	0.751879699248	0.248120300752	9.0	2	1.0	0.33
oats (w.)	0.818181818182	0.181818181818	0.9	0.1	4.5	1	0.5	0.0555555555556
oat (single grain)	0.818181818182	0.181818181818	0.9	0.1	4.5	1	0.5	0.0555555555556
mind	0.818181818182	0.181818181818	0.923076923077	0.0769230769231	4.5	1	1.5	0.125
(pl.) back muscles	0.818181818182	0.181818181818	0.923076923077	0.0769230769231	4.5	1	1.5	0.125
heavy wooden collar or yoke formerly to used in China to punish criminals	0.818181818182	0.181818181818	0.923076923077	0.0769230769231	4.5	1	1.5	0.125
porter?s yoke	0.818181818182	0.181818181818	0.923076923077	0.0769230769231	4.5	1	1.5	0.125
servitude	0.818181818182	0.181818181818	0.923076923077	0.0769230769231	4.5	1	1.5	0.125
cangue	0.818181818182	0.181818181818	0.923076923077	0.0769230769231	4.5	1	1.5	0.125
tenderloin	0.818181818182	0.181818181818	0.923076923077	0.0769230769231	4.5	1	1.5	0.125
yoke for oxen	0.818181818182	0.181818181818	0.923076923077	0.0769230769231	4.5	1	1.5	0.125
coupling	0.818181818182	0.181818181818	0.923076923077	0.0769230769231	4.5	1	1.5	0.125
oppression	0.818181818182	0.181818181818	0.923076923077	0.0769230769231	4.5	1	1.5	0.125
flock of sheep	0.818181818182	0.181818181818	0.971962616822	0.0280373831776	9.0	2	2.0	0.0576923076923
flower	0.818574514039	0.181425485961	0.998220640569	0.0017793594306	40.6071428571	9	16.3928571429	0.0292207792208
block	0.818731117825	0.181268882175	0.994841029626	0.00515897037432	45.1666666667	10	12.8333333333	0.0665501165501
silver	0.819155331255	0.180844668745	0.282172733882	0.717827266118	31.7072510823	7	34.2927489177	87.2383021019
food	0.82128002356	0.17871997644	0.979727538001	0.0202724619992	220.576579721	48	41.4234202794	0.85713086641
lead	0.821428571429	0.178571428571	0.79313304721	0.20686695279	13.8	3	1.2	0.312987012987
(snow)shovel	0.821782178218	0.178217821782	0.971962616822	0.0280373831776	9.22222222222	2	1.77777777778	0.0512820512821
s. or inferior horse	0.822222222222	0.177777777778	0.993548387097	0.00645161290323	9.25	2	2.75	0.0178571428571
endscraper	0.822580645161	0.177419354839	0.990566037736	0.00943396226415	13.9090909091	3	4.09090909091	0.038961038961
bunch	0.822690022732	0.177309977268	0.942375906744	0.0576240932562	78.8772893773	17	24.1227106227	1.4750476074
lamb meat	0.823008849558	0.176991150442	0.931506849315	0.0684931506849	9.3	2	1.7	0.125
pinewood spill	0.823529411765	0.176470588235	0.933333333333	0.0666666666667	4.66666666667	1	1.33333333333	0.0952380952381
level	0.823529411765	0.176470588235	0.965517241379	0.0344827586207	9.33333333333	2	4.66666666667	0.166666666667
gen. big cat	0.823529411765	0.176470588235	0.965517241379	0.0344827586207	9.33333333333	2	2.66666666667	0.0952380952381
pregnant	0.823529411765	0.176470588235	0.988023952096	0.0119760479042	9.33333333333	2	3.66666666667	0.0444444444444
fleshy fruit	0.823529411765	0.176470588235	0.988023952096	0.0119760479042	9.33333333333	2	3.66666666667	0.0444444444444
to suckle	0.823529411765	0.176470588235	0.988023952096	0.0119760479042	9.33333333333	2	3.66666666667	0.0444444444444
to yoke	0.823529411765	0.176470588235	0.992366412214	0.00763358778626	9.33333333333	2	1.66666666667	0.0128205128205
ore	0.824437038892	0.175562961108	0.94879585022	0.0512041497795	65.7434715822	14	13.2565284178	0.715421833374
stiff	0.824561403509	0.175438596491	0.995815899582	0.00418410041841	9.4	2	5.6	0.0235294117647
plaiting	0.824817518248	0.175182481752	0.970464135021	0.0295358649789	14.125	3	2.875	0.0875
badger	0.825783972125	0.174216027875	0.559205020921	0.440794979079	23.7	5	0.3	0.236475869809
burrow, den where the fem. rabbit gives birth to and nurses its young	0.826086956522	0.173913043478	0.6	0.4	4.75	1	0.25	0.166666666667
carpenter?s plane	0.826086956522	0.173913043478	0.6	0.4	4.75	1	0.25	0.166666666667
mouse	0.826086956522	0.173913043478	0.837209302326	0.162790697674	9.5	2	0.5	0.0972222222222
squirrel	0.826086956522	0.173913043478	0.837209302326	0.162790697674	9.5	2	0.5	0.0972222222222
ewe between one and two year old	0.826086956522	0.173913043478	0.983193277311	0.0168067226891	9.5	2	1.5	0.025641025641
idler	0.827586206897	0.172413793103	0.6	0.4	4.8	1	0.2	0.133333333333
wooden stick	0.827586206897	0.172413793103	0.923076923077	0.0769230769231	4.8	1	1.2	0.1
daytime	0.827586206897	0.172413793103	0.923076923077	0.0769230769231	4.8	1	1.2	0.1
daylight	0.827586206897	0.172413793103	0.923076923077	0.0769230769231	4.8	1	1.2	0.1
to put	0.827586206897	0.172413793103	0.957894736842	0.0421052631579	9.6	2	1.4	0.0615384615385
fem. hare or rabbit	0.827586206897	0.172413793103	0.96	0.04	9.6	2	2.4	0.1
ritual figure for pastry	0.828571428571	0.171428571429	0.6	0.4	4.83333333333	1	0.166666666667	0.111111111111
cattle defender deity	0.828571428571	0.171428571429	0.6	0.4	4.83333333333	1	0.166666666667	0.111111111111
entrails	0.828571428571	0.171428571429	0.989205103042	0.0107948969578	29.0	6	8.0	0.0873015873016
aurochs	0.830115830116	0.169884169884	0.817314403394	0.182685596606	58.6363636364	12	5.36363636364	1.1988765951
hen	0.830284312423	0.169715687577	0.513088633431	0.486911366569	188.349978041	38.5	78.1500219587	74.1628863123
feasting	0.830769230769	0.169230769231	0.96	0.04	9.81818181818	2	2.18181818182	0.0909090909091
to make	0.83121232418	0.16878767582	0.937282372701	0.0627176272992	19.6984126984	4	3.30158730159	0.220923520924
hub	0.831425550144	0.168574449856	0.56820374012	0.43179625988	98.6419413919	20	62.3580586081	47.3878902569
female	0.831775700935	0.168224299065	0.915492957746	0.0845070422535	9.88888888889	2	1.11111111111	0.102564102564
ewe	0.831979363263	0.168020636737	0.96998175954	0.0300182404601	272.340742591	55	44.6592574093	1.38207993552
beast	0.832115416964	0.167884583036	0.993201122185	0.00679887781488	173.476557925	35	66.5234420752	0.455380833138
tapeworm	0.832167832168	0.167832167832	0.968	0.032	14.875	3	4.125	0.136363636364
autumn (poetic)	0.833333333333	0.166666666667	0.0	1.0	5.0	1	0.0	1.16666666667
goat more than one year old	0.833333333333	0.166666666667	0.0	1.0	5.0	1	0.0	0.208333333333
January	0.833333333333	0.166666666667	0.0	1.0	5.0	1	0.0	0.138888888889
berry esp. rowanberry	0.833333333333	0.166666666667	0.875	0.125	5.0	1	1.0	0.142857142857
rowanberry	0.833333333333	0.166666666667	0.875	0.125	5.0	1	1.0	0.142857142857
bound	0.833333333333	0.166666666667	0.923076923077	0.0769230769231	5.0	1	1.0	0.0833333333333
(rope) for tying	0.833333333333	0.166666666667	0.923076923077	0.0769230769231	5.0	1	1.0	0.0833333333333
rope	0.833333333333	0.166666666667	0.923076923077	0.0769230769231	5.0	1	1.0	0.0833333333333
row	0.833333333333	0.166666666667	0.933333333333	0.0666666666667	5.0	1	1.0	0.0714285714286
in which the furrows are drawn	0.833333333333	0.166666666667	0.933333333333	0.0666666666667	5.0	1	1.0	0.0714285714286
knot	0.833333333333	0.166666666667	0.96	0.04	10.0	2	3.0	0.125
throwing weapon	0.833333333333	0.166666666667	0.964285714286	0.0357142857143	5.0	1	3.0	0.111111111111
node	0.833333333333	0.166666666667	0.979591836735	0.0204081632653	5.0	1	2.0	0.0416666666667
to bind together	0.833333333333	0.166666666667	0.979591836735	0.0204081632653	5.0	1	2.0	0.0416666666667
headgear	0.833333333333	0.166666666667	0.979591836735	0.0204081632653	5.0	1	2.0	0.0416666666667
twine together	0.833333333333	0.166666666667	0.979591836735	0.0204081632653	5.0	1	2.0	0.0416666666667
collection of texts	0.833333333333	0.166666666667	0.979591836735	0.0204081632653	5.0	1	2.0	0.0416666666667
dear child	0.833333333333	0.166666666667	0.981818181818	0.0181818181818	10.0	2	6.0	0.111111111111
young of animal	0.833333333333	0.166666666667	0.981818181818	0.0181818181818	10.0	2	6.0	0.111111111111
herb	0.834146341463	0.165853658537	0.998668442077	0.00133155792277	20.1176470588	4	5.88235294118	0.0078431372549
m. sheep	0.835365853659	0.164634146341	0.396694214876	0.603305785124	15.2222222222	3	1.77777777778	2.7037037037
hide	0.836048680157	0.163951319843	0.990112813101	0.00988718689856	198.875486683	39	58.1245133169	0.580426713954
to hunt	0.836508248233	0.163491751767	0.998802015656	0.0011979843438	117.67987988	23	47.3201201201	0.0567567567568
flax	0.837032810271	0.162967189729	0.489388953061	0.510611046939	35.9534313725	7	65.0465686275	67.8672787747
whetstone	0.837209302326	0.162790697674	0.921686746988	0.078313253012	20.5714285714	4	2.42857142857	0.206349206349
to extend	0.837209302326	0.162790697674	0.995215311005	0.00478468899522	10.2857142857	2	3.71428571429	0.0178571428571
cluster	0.83759666865	0.16240333135	0.982126168425	0.0178738315751	82.5201465201	16	22.4798534799	0.409113541466
household	0.837837837838	0.162162162162	0.972222222222	0.0277777777778	5.16666666667	1	0.833333333333	0.0238095238095
tomb stone	0.837837837838	0.162162162162	0.972222222222	0.0277777777778	5.16666666667	1	0.833333333333	0.0238095238095
thin, round stone	0.837837837838	0.162162162162	0.972222222222	0.0277777777778	5.16666666667	1	0.833333333333	0.0238095238095
having recently given birth	0.837837837838	0.162162162162	0.995815899582	0.00418410041841	10.3333333333	2	4.66666666667	0.0196078431373
y. fallow deer	0.837837837838	0.162162162162	0.995815899582	0.00418410041841	10.3333333333	2	4.66666666667	0.0196078431373
large millet	0.83850931677	0.16149068323	0.881355932203	0.118644067797	10.3846153846	2	0.615384615385	0.0828402366864
plain	0.838919249227	0.161080750773	0.98699211675	0.0130078832497	119.785527691	23	36.2144723093	0.477282057023
anvil	0.839918688858	0.160081311142	0.884989175994	0.115010824006	31.480952381	6	3.51904761905	0.457326007326
stone of a fruit	0.84	0.16	0.875	0.125	5.25	1	0.75	0.107142857143
pointof a spear	0.84	0.16	0.875	0.125	5.25	1	0.75	0.107142857143
mill's wheel	0.84	0.16	0.933333333333	0.0666666666667	10.5	2	1.5	0.107142857143
to strip	0.84	0.16	0.98406374502	0.0159362549801	10.5	2	6.5	0.105263157895
wolf	0.840232747356	0.159767252644	0.331170267433	0.668829732567	63.1092592593	12	47.8907407407	96.7198884439
man-made honeycomb	0.840490797546	0.159509202454	0.829787234043	0.170212765957	10.5384615385	2	0.461538461538	0.094674556213
wooden mortar	0.840816326531	0.159183673469	0.995192307692	0.00480769230769	15.8461538462	3	4.15384615385	0.0200668896321
soured wine	0.840909090909	0.159090909091	0.972222222222	0.0277777777778	5.28571428571	1	0.714285714286	0.0204081632653
sour	0.840909090909	0.159090909091	0.972222222222	0.0277777777778	5.28571428571	1	0.714285714286	0.0204081632653
intoxicating	0.840909090909	0.159090909091	0.972222222222	0.0277777777778	5.28571428571	1	0.714285714286	0.0204081632653
Caucasian whortleberry	0.840909090909	0.159090909091	0.972222222222	0.0277777777778	5.28571428571	1	0.714285714286	0.0204081632653
kind of drink	0.840909090909	0.159090909091	0.972222222222	0.0277777777778	5.28571428571	1	0.714285714286	0.0204081632653
to cut from the roots	0.842105263158	0.157894736842	0.933333333333	0.0666666666667	5.33333333333	1	0.666666666667	0.047619047619
sting	0.842105263158	0.157894736842	0.952380952381	0.047619047619	5.33333333333	1	1.66666666667	0.0833333333333
prick	0.842105263158	0.157894736842	0.952380952381	0.047619047619	5.33333333333	1	1.66666666667	0.0833333333333
arrowhead	0.842105263158	0.157894736842	0.952380952381	0.047619047619	5.33333333333	1	1.66666666667	0.0833333333333
spearhead	0.842105263158	0.157894736842	0.952380952381	0.047619047619	5.33333333333	1	1.66666666667	0.0833333333333
ruffle	0.842105263158	0.157894736842	0.952380952381	0.047619047619	5.33333333333	1	1.66666666667	0.0833333333333
mop of hair	0.842105263158	0.157894736842	0.952380952381	0.047619047619	5.33333333333	1	1.66666666667	0.0833333333333
to rub	0.842105263158	0.157894736842	0.975609756098	0.0243902439024	10.6666666667	2	3.33333333333	0.0833333333333
intestinal fat	0.842223891811	0.157776108189	0.974700399467	0.0252996005326	32.0285714286	6	6.97142857143	0.180952380952
a volume of any material that is scooped with a shovel	0.843373493976	0.156626506024	0.976744186047	0.0232558139535	16.1538461538	3	4.84615384615	0.115384615385
vane	0.843373493976	0.156626506024	0.976744186047	0.0232558139535	16.1538461538	3	4.84615384615	0.115384615385
honeycomb full of honey	0.84375	0.15625	0.988023952096	0.0119760479042	10.8	2	2.2	0.0266666666667
iron	0.843948821925	0.156051178075	0.252134455453	0.747865544547	97.3467741935	18	24.6532258065	73.1248654986
year	0.844001351249	0.155998648751	0.956679239919	0.0433207600812	211.002165482	39	27.9978345184	1.26780996321
worm	0.844448787395	0.155551212605	0.992635421175	0.00736457882506	195.435032855	36	45.5649671449	0.338056435466
viper	0.845142384081	0.154857615919	0.976348254327	0.0236517456731	278.334787296	51	32.665212704	0.791305049001
vixen	0.845322387549	0.154677612451	0.922764815018	0.0772351849818	92.9060150376	17	9.09398496241	0.761164274322
uncastrated m. swine	0.845588235294	0.154411764706	0.974169741697	0.0258302583026	16.4285714286	3	2.57142857143	0.0681818181818
weaver	0.846153846154	0.153846153846	0.297872340426	0.702127659574	5.5	1	0.5	1.17857142857
subethnic group of Georgians	0.846153846154	0.153846153846	0.777777777778	0.222222222222	5.5	1	0.5	0.142857142857
October	0.846153846154	0.153846153846	0.951167728238	0.0488322717622	11.0	2	2.0	0.102678571429
income	0.846153846154	0.153846153846	0.956598759965	0.0434012400354	11.0	2	3.0	0.136111111111
courageous	0.846153846154	0.153846153846	0.979591836735	0.0204081632653	5.5	1	1.5	0.03125
tough	0.846153846154	0.153846153846	0.979591836735	0.0204081632653	5.5	1	1.5	0.03125
October (formerly autumn)	0.846153846154	0.153846153846	0.979591836735	0.0204081632653	5.5	1	1.5	0.03125
eared owl	0.846153846154	0.153846153846	0.979591836735	0.0204081632653	5.5	1	1.5	0.03125
w. strawberry	0.846153846154	0.153846153846	0.988023952096	0.0119760479042	11.0	2	2.0	0.0242424242424
to dig	0.847988829577	0.152011170423	0.976053020657	0.0239469793434	133.88313407	24	38.1168659298	0.935178501308
hook	0.849543780086	0.150456219914	0.98133090104	0.0186690989601	146.807744438	26	36.1922555623	0.688531055087
bowl	0.85	0.15	0.927536231884	0.0724637681159	11.3333333333	2	2.66666666667	0.208333333333
jug	0.85	0.15	0.927536231884	0.0724637681159	11.3333333333	2	2.66666666667	0.208333333333
to eat grain	0.85	0.15	0.989690721649	0.0103092783505	11.3333333333	2	2.66666666667	0.0277777777778
warm	0.85	0.15	0.997134670487	0.00286532951289	17.0	3	9.0	0.0258620689655
shaggy hair	0.851351351351	0.148648648649	0.965517241379	0.0344827586207	11.4545454545	2	2.54545454545	0.0909090909091
nourishment	0.851351351351	0.148648648649	0.979591836735	0.0204081632653	17.1818181818	3	3.81818181818	0.0795454545455
dog	0.851821732813	0.148178267187	0.261031849595	0.738968150405	74.7321637427	13	32.2678362573	91.3486354776
clothes	0.851851851852	0.148148148148	0.583333333333	0.416666666667	5.75	1	0.25	0.178571428571
to give birth	0.851851851852	0.148148148148	0.993726474279	0.00627352572146	23.0	4	6.0	0.0378787878788
sand	0.852631578947	0.147368421053	0.998247919404	0.00175208059571	34.7142857143	6	12.2857142857	0.0215633423181
sheep (2 year old)	0.852760736196	0.147239263804	0.687679083095	0.312320916905	11.5833333333	2	0.416666666667	0.189236111111
fluid	0.852892698203	0.147107301797	0.909014716395	0.0909852836049	34.7865546218	6	2.21344537815	0.221548619448
crumbs	0.852941176471	0.147058823529	0.979591836735	0.0204081632653	5.8	1	1.2	0.025
to smash	0.852941176471	0.147058823529	0.979591836735	0.0204081632653	5.8	1	1.2	0.025
earwax	0.852941176471	0.147058823529	0.979591836735	0.0204081632653	5.8	1	1.2	0.025
fragments	0.852941176471	0.147058823529	0.979591836735	0.0204081632653	5.8	1	1.2	0.025
scrape	0.852941176471	0.147058823529	0.979591836735	0.0204081632653	5.8	1	1.2	0.025
piece (of cloth)	0.852941176471	0.147058823529	0.979591836735	0.0204081632653	5.8	1	1.2	0.025
withe	0.853211009174	0.146788990826	0.984126984127	0.015873015873	23.25	4	7.75	0.125
boar	0.853395952503	0.146604047497	0.979579357599	0.020420642401	320.160174218	55	67.8398257822	1.41421193914
fenced place for milking sheep	0.853658536585	0.146341463415	0.933333333333	0.0666666666667	5.83333333333	1	1.16666666667	0.0833333333333
unskimmed milk	0.853658536585	0.146341463415	0.933333333333	0.0666666666667	5.83333333333	1	1.16666666667	0.0833333333333
wooden shovel	0.854166666667	0.145833333333	0.583333333333	0.416666666667	5.85714285714	1	0.142857142857	0.102040816327
half-year	0.854166666667	0.145833333333	0.971223021583	0.0287769784173	11.7142857143	2	1.28571428571	0.0380952380952
sausage	0.854430379747	0.145569620253	0.997601918465	0.00239808153477	23.4782608696	4	4.52173913043	0.0108695652174
castrated m. pig	0.854646132549	0.145353867451	0.994447670999	0.00555232900076	35.2785714286	6	6.72142857143	0.0375279503106
(cluster of) grape	0.854838709677	0.145161290323	0.975609756098	0.0243902439024	11.7777777778	2	2.22222222222	0.0555555555556
cheese	0.854866938922	0.145133061078	0.927952298937	0.0720477010634	41.2316017316	7	4.7683982684	0.370226070226
riches	0.854976303318	0.145023696682	0.996168647638	0.00383135236214	100.222222222	17	24.7777777778	0.0952975157796
white fox	0.855421686747	0.144578313253	0.945945945946	0.0540540540541	11.8333333333	2	1.16666666667	0.0666666666667
cart (drawn by a single ox)	0.857142857143	0.142857142857	0.0	1.0	6.0	1	0.0	0.122448979592
half-grown piglet	0.857142857143	0.142857142857	0.743801652893	0.256198347107	6.0	1	3.0	1.03333333333
cow (gen.)	0.857142857143	0.142857142857	0.947368421053	0.0526315789474	6.0	1	3.0	0.166666666667
to cleave	0.857142857143	0.142857142857	0.964285714286	0.0357142857143	6.0	1	2.0	0.0740740740741
to let go	0.857142857143	0.142857142857	0.964285714286	0.0357142857143	6.0	1	2.0	0.0740740740741
to strike fire	0.857142857143	0.142857142857	0.964285714286	0.0357142857143	6.0	1	2.0	0.0740740740741
thin	0.857142857143	0.142857142857	0.964285714286	0.0357142857143	6.0	1	2.0	0.0740740740741
to become warm	0.857142857143	0.142857142857	0.979591836735	0.0204081632653	6.0	1	1.0	0.0208333333333
flagstone	0.857142857143	0.142857142857	0.994263862333	0.0057361376673	18.0	3	5.0	0.0288461538462
lava	0.857142857143	0.142857142857	0.994263862333	0.0057361376673	18.0	3	5.0	0.0288461538462
butter	0.857289162741	0.142710837259	0.996629454844	0.00337054515574	174.208113392	29	41.791886608	0.141337826482
to useful	0.857664233577	0.142335766423	0.988372093023	0.0116279069767	18.0769230769	3	3.92307692308	0.0461538461538
bittern	0.857707509881	0.142292490119	0.9375	0.0625	18.0833333333	3	1.91666666667	0.127777777778
cat	0.857752489331	0.142247510669	0.187496701789	0.812503298211	60.3	10	18.7	81.0350877193
loaf	0.859949982136	0.140050017864	0.989518971839	0.0104810281614	42.9821428571	7	6.01785714286	0.0637414056532
name for a cat	0.86	0.14	0.28125	0.71875	6.14285714286	1	0.857142857143	2.19047619048
wheel for plow	0.86	0.14	0.979591836735	0.0204081632653	6.14285714286	1	0.857142857143	0.0178571428571
to freeze	0.860465116279	0.139534883721	0.869565217391	0.130434782609	12.3333333333	2	0.666666666667	0.1
wood	0.86090815828	0.13909184172	0.687257359918	0.312742640082	266.148253905	43	237.851746095	108.236575351
a kind of grain	0.861111111111	0.138888888889	0.914285714286	0.0857142857143	6.2	1	0.8	0.075
armpit	0.861491628615	0.138508371385	0.990586531499	0.00941346850109	87.0769230769	14	12.9230769231	0.122807017544
birch	0.861646822069	0.138353177931	0.115823101525	0.884176898475	18.6836363636	3	2.31636363636	17.6827868428
water jet	0.861660079051	0.138339920949	0.995485327314	0.00451467268623	31.1428571429	5	12.8571428571	0.0583090379009
load	0.86170212766	0.13829787234	0.998392282958	0.0016077170418	18.6923076923	3	5.30769230769	0.00854700854701
double-sided axe	0.862068965517	0.137931034483	0.984375	0.015625	6.25	1	1.75	0.0277777777778
to castrate	0.862068965517	0.137931034483	0.984375	0.015625	6.25	1	1.75	0.0277777777778
instrument for cutting	0.862068965517	0.137931034483	0.984375	0.015625	6.25	1	1.75	0.0277777777778
to thin out (plants)	0.862068965517	0.137931034483	0.984375	0.015625	6.25	1	1.75	0.0277777777778
woman?s breast	0.862595419847	0.137404580153	0.979057591623	0.020942408377	12.5555555556	2	2.44444444444	0.0522875816993
pap	0.862595419847	0.137404580153	0.979057591623	0.020942408377	12.5555555556	2	2.44444444444	0.0522875816993
axis	0.862697076381	0.137302923619	0.981485947999	0.0185140520006	144.512820513	23	21.4871794872	0.405318852687
earthenware bread-baking dish	0.862745098039	0.137254901961	0.818181818182	0.181818181818	12.5714285714	2	0.428571428571	0.0952380952381
(poisonous) snake	0.862857142857	0.137142857143	0.689781021898	0.310218978102	18.875	3	1.125	0.505952380952
to hit	0.862977523446	0.137022476554	0.985450323795	0.0145496762047	107.067236467	17	24.9327635328	0.36811965812
able to fly	0.86301369863	0.13698630137	0.941176470588	0.0588235294118	12.6	2	1.4	0.0875
long arrow	0.86301369863	0.13698630137	0.941176470588	0.0588235294118	12.6	2	1.4	0.0875
fledged	0.86301369863	0.13698630137	0.941176470588	0.0588235294118	12.6	2	1.4	0.0875
timber	0.863497533331	0.136502466669	0.987635088686	0.0123649113145	145.49512365	23	38.5048763497	0.482070135714
elevated place	0.863636363636	0.136363636364	0.914285714286	0.0857142857143	6.33333333333	1	0.666666666667	0.0625
berry (gall) of the kermes tree	0.863636363636	0.136363636364	0.987654320988	0.0123456790123	6.33333333333	1	2.66666666667	0.0333333333333
stocky boy	0.863636363636	0.136363636364	0.987654320988	0.0123456790123	6.33333333333	1	2.66666666667	0.0333333333333
kernel of fruit especially of the pomegranate	0.863636363636	0.136363636364	0.987654320988	0.0123456790123	6.33333333333	1	2.66666666667	0.0333333333333
scarlet	0.863636363636	0.136363636364	0.987654320988	0.0123456790123	6.33333333333	1	2.66666666667	0.0333333333333
kermes oak	0.863636363636	0.136363636364	0.987654320988	0.0123456790123	6.33333333333	1	2.66666666667	0.0333333333333
bulb	0.863636363636	0.136363636364	0.987654320988	0.0123456790123	6.33333333333	1	2.66666666667	0.0333333333333
s. log	0.863636363636	0.136363636364	0.987654320988	0.0123456790123	6.33333333333	1	2.66666666667	0.0333333333333
berry	0.864850476087	0.135149523913	0.952809853565	0.0471901464347	230.371637558	36	23.6283624422	1.17025016008
kitten	0.864864864865	0.135135135135	0.857142857143	0.142857142857	6.4	1	0.6	0.1
pug	0.864864864865	0.135135135135	0.857142857143	0.142857142857	6.4	1	0.6	0.1
kid goat	0.865979381443	0.134020618557	0.941176470588	0.0588235294118	12.9230769231	2	1.07692307692	0.0673076923077
heifer	0.866540377036	0.133459622964	0.970007672558	0.0299923274425	77.9148351648	12	15.0851648352	0.466428478928
to shout (to a horse)	0.866666666667	0.133333333333	0.0	1.0	13.0	2	0.0	0.115555555556
cow (coll.)	0.866666666667	0.133333333333	0.32	0.68	6.5	1	0.5	1.0625
kind of butterfly	0.866666666667	0.133333333333	0.857142857143	0.142857142857	6.5	1	0.5	0.0833333333333
flour	0.866666666667	0.133333333333	0.98755186722	0.0124481327801	26.0	4	4.0	0.0504201680672
spade	0.86670750506	0.13329249494	0.556619920002	0.443380079998	130.045957269	20	81.9540427315	65.2811527518
swine (gen.)	0.867781238155	0.132218761845	0.993503388544	0.00649661145645	203.459917545	31	46.5400824553	0.304329946279
field of corn	0.867924528302	0.132075471698	0.967741935484	0.0322580645161	13.1428571429	2	2.85714285714	0.0952380952381
meat (prepared for winter)	0.868421052632	0.131578947368	0.962264150943	0.0377358490566	13.2	2	1.8	0.0705882352941
corpse	0.868421052632	0.131578947368	0.99922690375	0.000773096250483	39.6	6	9.4	0.00727272727273
sea monster	0.868613138686	0.131386861314	0.951048951049	0.048951048951	13.2222222222	2	1.77777777778	0.0915032679739
alcoholic drink	0.868852459016	0.131147540984	0.857142857143	0.142857142857	6.625	1	0.375	0.0625
earth (soil, ground)	0.868852459016	0.131147540984	0.923076923077	0.0769230769231	13.25	2	0.75	0.0625
wall	0.868857142857	0.131142857143	0.956259355176	0.0437406448241	39.7516339869	6	2.24836601307	0.102843416569
wine-skin	0.868891537545	0.131108462455	0.998366013072	0.0016339869281	33.1363636364	5	8.86363636364	0.0145067698259
low-bred or coarse dog	0.869047619048	0.130952380952	0.9963099631	0.00369003690037	13.2727272727	2	2.72727272727	0.010101010101
mongrel	0.869047619048	0.130952380952	0.9963099631	0.00369003690037	13.2727272727	2	2.72727272727	0.010101010101
to spread	0.869090909091	0.130909090909	0.967010309278	0.0329896907216	13.2777777778	2	3.72222222222	0.126984126984
crow (gen.)	0.869281045752	0.130718954248	0.984435797665	0.0155642023346	33.25	5	5.75	0.0909090909091
digging tool	0.869565217391	0.130434782609	0.974025974026	0.025974025974	20.0	3	7.0	0.186666666667
drops of water	0.869822485207	0.130177514793	0.962264150943	0.0377358490566	13.3636363636	2	1.63636363636	0.0641711229947
to stretch	0.869924294563	0.130075705437	0.985346534653	0.0146534653465	20.0634920635	3	4.93650793651	0.0734126984127
tender	0.87037037037	0.12962962963	0.786430223593	0.213569776407	33.5714285714	5	1.42857142857	0.387955182073
to sow	0.870429616088	0.129570383912	0.536474528277	0.463525471723	60.4603174603	9	52.5396825397	45.3954099399
basement	0.870967741935	0.129032258065	0.9375	0.0625	6.75	1	1.25	0.0833333333333
winter sheepfold for cattle	0.870967741935	0.129032258065	0.9375	0.0625	6.75	1	1.25	0.0833333333333
to sew	0.871218088678	0.128781911322	0.381818729566	0.618181270434	81.1807881773	12	34.8192118227	56.3738311751
border	0.871362940276	0.128637059724	0.998259355962	0.00174064403829	27.0952380952	4	5.90476190476	0.010296010296
boundary	0.871362940276	0.128637059724	0.998259355962	0.00174064403829	27.0952380952	4	5.90476190476	0.010296010296
forest	0.871652584532	0.128347415468	0.991186153505	0.0088138464948	292.028172115	43	57.9718278848	0.515498315016
to do	0.871794871795	0.128205128205	0.964285714286	0.0357142857143	6.8	1	1.2	0.0444444444444
seed	0.87207279988	0.12792720012	0.921849224182	0.0781507758177	299.945618749	44	44.0543812509	3.73475833424
strong alcoholic drink	0.873015873016	0.126984126984	0.571428571429	0.428571428571	6.875	1	0.125	0.09375
one-year-old vine to shoot	0.873015873016	0.126984126984	0.571428571429	0.428571428571	6.875	1	0.125	0.09375
chicken	0.873478148105	0.126521851895	0.468091634758	0.531908365242	117.364141414	17	32.6358585859	37.0852305396
panther	0.873858920501	0.126141079499	0.896811177654	0.103188822346	103.914473061	15	13.0855269392	1.50564594675
ale vessel	0.873873873874	0.126126126126	0.9963099631	0.00369003690037	13.8571428571	2	2.14285714286	0.00793650793651
calf	0.874958590961	0.125041409039	0.617552899655	0.382447100345	293.888729364	42	66.1112706363	40.9423448082
long wickerwork cane	0.875	0.125	0.941176470588	0.0588235294118	7.0	1	1.0	0.0625
to part	0.875	0.125	0.987654320988	0.0123456790123	7.0	1	2.0	0.025
commodity	0.875	0.125	0.987654320988	0.0123456790123	7.0	1	2.0	0.025
welfare	0.875	0.125	0.987654320988	0.0123456790123	7.0	1	2.0	0.025
share	0.875	0.125	0.987654320988	0.0123456790123	7.0	1	2.0	0.025
business	0.875	0.125	0.999132697311	0.000867302688638	21.0	3	12.0	0.0104166666667
labour	0.875324675325	0.124675324675	0.974332111053	0.0256678889471	28.0833333333	4	12.9166666667	0.340277777778
sharp	0.875647668394	0.124352331606	0.932432432432	0.0675675675676	14.0833333333	2	1.91666666667	0.138888888889
fire	0.875776397516	0.124223602484	0.992372977255	0.00762702274528	28.2	4	10.8	0.0830049261084
ear	0.875896110001	0.124103889999	0.936729136633	0.063270863367	56.4621212121	8	5.53787878788	0.374053030303
thing	0.876880984952	0.123119015048	0.961948249619	0.0380517503805	14.2444444444	2	1.75555555556	0.0694444444444
to wind	0.876899696049	0.123100303951	0.80407938258	0.19592061742	42.7407407407	6	1.25925925926	0.306828973496
heat	0.876978076862	0.123021923138	0.990553717399	0.00944628260069	71.2863247863	10	26.7136752137	0.254751378889
(dial.) channel	0.877094972067	0.122905027933	0.860759493671	0.139240506329	14.2727272727	2	0.727272727273	0.117647058824
poisonous insect	0.877192982456	0.122807017544	0.964285714286	0.0357142857143	7.14285714286	1	0.857142857143	0.031746031746
sapwood	0.877192982456	0.122807017544	0.975609756098	0.0243902439024	14.2857142857	2	5.71428571429	0.142857142857
film	0.877192982456	0.122807017544	0.975609756098	0.0243902439024	14.2857142857	2	5.71428571429	0.142857142857
y. sow	0.877431906615	0.122568093385	0.96190799141	0.0380920085905	21.4761904762	3	3.52380952381	0.139544513458
cheetah	0.877478280241	0.122521719759	0.890148855498	0.109851144502	35.8090909091	5	4.19090909091	0.517190082645
weapon	0.877486910995	0.122513089005	0.829795309507	0.170204690493	28.6495726496	4	1.35042735043	0.276994900524
(m.) roe deer	0.8779342723	0.1220657277	0.971428571429	0.0285714285714	14.3846153846	2	2.61538461538	0.0769230769231
blade of such tools	0.878048780488	0.121951219512	0.9	0.1	7.2	1	0.8	0.0888888888889
tiger	0.878220140515	0.121779859485	0.865265760198	0.134734239802	28.8461538462	4	2.15384615385	0.335384615385
buffalo (young, up to 1 year old)	0.878378378378	0.121621621622	0.984375	0.015625	7.22222222222	1	0.777777777778	0.0123456790123
sown plowed field	0.878378378378	0.121621621622	0.984375	0.015625	7.22222222222	1	0.777777777778	0.0123456790123
to make a border	0.878378378378	0.121621621622	0.984375	0.015625	7.22222222222	1	0.777777777778	0.0123456790123
messenger	0.878504672897	0.121495327103	0.967741935484	0.0322580645161	14.4615384615	2	1.53846153846	0.0512820512821
kind of gold	0.878787878788	0.121212121212	0.964285714286	0.0357142857143	7.25	1	0.75	0.0277777777778
beetle	0.878787878788	0.121212121212	0.972222222222	0.0277777777778	7.25	1	1.75	0.05
w. bee	0.878787878788	0.121212121212	0.972222222222	0.0277777777778	7.25	1	1.75	0.05
chafer	0.878787878788	0.121212121212	0.972222222222	0.0277777777778	7.25	1	1.75	0.05
harp	0.878787878788	0.121212121212	0.972222222222	0.0277777777778	7.25	1	1.75	0.05
field-bee	0.878787878788	0.121212121212	0.972222222222	0.0277777777778	7.25	1	1.75	0.05
swarm of bees	0.878787878788	0.121212121212	0.972222222222	0.0277777777778	7.25	1	1.75	0.05
heath	0.878787878788	0.121212121212	0.972222222222	0.0277777777778	7.25	1	1.75	0.05
wether	0.878787878788	0.121212121212	0.985915492958	0.0140845070423	14.5	2	3.5	0.05
fem. adult sheep	0.878787878788	0.121212121212	0.985915492958	0.0140845070423	14.5	2	3.5	0.05
arc	0.878911714896	0.121088285104	0.972995359504	0.0270046404957	94.3596837945	13	10.6403162055	0.295312727943
scissors	0.879087874437	0.120912125563	0.996613214533	0.00338678546717	159.950320513	22	46.0496794872	0.156490384615
sheep (earless or with short ears)	0.879310344828	0.120689655172	0.9375	0.0625	7.28571428571	1	0.714285714286	0.047619047619
sheep (hornless)	0.879310344828	0.120689655172	0.9375	0.0625	7.28571428571	1	0.714285714286	0.047619047619
grassland	0.879474068663	0.120525931337	0.988505747126	0.0114942528736	36.4848484848	5	6.51515151515	0.0757575757576
bison	0.879598662207	0.120401337793	0.343768458358	0.656231541642	14.6111111111	2	5.38888888889	10.287037037
to tear	0.879755645501	0.120244354499	0.962390882394	0.0376091176062	131.695177582	18	19.3048224177	0.754410032304
fem. horse	0.879827822383	0.120172177617	0.982242664492	0.0177573355083	124.463692654	17	16.5363073459	0.298949300641
suet	0.879946594069	0.120053405931	0.985401482823	0.0145985171773	131.933272283	18	31.0667277167	0.460247083164
m. lamb	0.88	0.12	0.921985815603	0.0780141843972	14.6666666667	2	1.33333333333	0.112820512821
summer	0.880318471988	0.119681528012	0.359220767797	0.640779232203	88.2660995335	12	40.7339004665	72.6612707432
living animal	0.880341880342	0.119658119658	0.996721311475	0.00327868852459	14.7142857143	2	2.28571428571	0.00751879699248
bow	0.880474111964	0.119525888036	0.419722630202	0.580277369798	103.129437229	14	43.8705627706	60.652185382
cudgel	0.880597014925	0.119402985075	0.934256055363	0.0657439446367	14.75	2	2.25	0.158333333333
animal	0.880913800735	0.119086199265	0.992085429298	0.00791457070185	325.480261118	44	64.5197388818	0.514719821464
dish kneaded with milk and mint	0.881355932203	0.118644067797	0.9	0.1	7.42857142857	1	0.571428571429	0.0634920634921
boiled, fermantable milk	0.881355932203	0.118644067797	0.9	0.1	7.42857142857	1	0.571428571429	0.0634920634921
cloth	0.881499492485	0.118500507515	0.997588179928	0.00241182007233	104.14295393	14	24.8570460705	0.0600956625769
tombstone	0.881790036589	0.118209963411	0.983084577114	0.0169154228856	29.8380952381	4	4.1619047619	0.0716117216117
to roll	0.881829987014	0.118170012986	0.955609333063	0.0443906669367	97.010989011	13	7.98901098901	0.371111408916
spring corn	0.881996974281	0.118003025719	0.995670995671	0.004329004329	44.8461538462	6	14.1538461538	0.0615384615385
womb	0.882142857143	0.117857142857	0.845528455285	0.154471544715	22.4545454545	3	0.545454545455	0.0996503496503
wild donkey	0.882352941176	0.117647058824	0.84375	0.15625	7.5	1	0.5	0.0925925925926
burly	0.882352941176	0.117647058824	0.952380952381	0.047619047619	7.5	1	1.5	0.075
barren	0.882352941176	0.117647058824	0.952380952381	0.047619047619	7.5	1	1.5	0.075
stickleback	0.882352941176	0.117647058824	0.972972972973	0.027027027027	15.0	2	3.0	0.0833333333333
m. of certain birds	0.882352941176	0.117647058824	0.972972972973	0.027027027027	15.0	2	3.0	0.0833333333333
carriage	0.882621137896	0.117378862104	0.956868443318	0.0431315566824	82.7136363636	11	7.28636363636	0.328438259601
bird cherry	0.8828125	0.1171875	0.980306345733	0.019693654267	22.6	3	2.4	0.0482142857143
animal fat	0.8830807717	0.1169192283	0.994983041721	0.00501695827893	151.058262108	20	35.9417378917	0.181227409829
fallow deer	0.883439350582	0.116560649418	0.98454474613	0.0154552538703	227.376740348	30	33.6232596522	0.527813505597
to thrust	0.883720930233	0.116279069767	0.952856904881	0.0471430951191	22.8	3	5.2	0.257272727273
log	0.883902176834	0.116097823166	0.980781145526	0.0192188544735	91.3611111111	12	18.6388888889	0.365237540238
fang	0.88416988417	0.11583011583	0.98687664042	0.0131233595801	38.1666666667	5	7.83333333333	0.104166666667
hornless	0.884422110553	0.115577889447	0.995983935743	0.00401606425703	30.6086956522	4	5.39130434783	0.0217391304348
to knit	0.884615384615	0.115384615385	0.960967355553	0.0390326444474	46.0	6	6.0	0.243708452042
bee garburrow	0.884615384615	0.115384615385	0.987654320988	0.0123456790123	7.66666666667	1	1.33333333333	0.0166666666667
remains of beeswax	0.884615384615	0.115384615385	0.987654320988	0.0123456790123	7.66666666667	1	1.33333333333	0.0166666666667
mother bee	0.884615384615	0.115384615385	0.987654320988	0.0123456790123	7.66666666667	1	1.33333333333	0.0166666666667
leopard	0.884734808951	0.115265191049	0.408758147943	0.591241852057	99.7833987151	13	26.2166012849	37.9205943082
cliff	0.884756121047	0.115243878953	0.993982012795	0.00601798720471	168.899509804	22	31.1004901961	0.188295512042
rat	0.885245901639	0.114754098361	0.75	0.25	7.71428571429	1	0.285714285714	0.0952380952381
sound for scaring a cat	0.885245901639	0.114754098361	0.75	0.25	7.71428571429	1	0.285714285714	0.0952380952381
beaver	0.885245901639	0.114754098361	0.75	0.25	7.71428571429	1	0.285714285714	0.0952380952381
herring	0.885270170244	0.114729829756	0.989247311828	0.010752688172	38.5806451613	5	7.41935483871	0.0806451612903
roll	0.885714285714	0.114285714286	0.925925925926	0.0740740740741	7.75	1	1.25	0.1
billy-goat	0.885920436817	0.114079563183	0.941002350565	0.0589976494349	38.8290598291	5	4.17094017094	0.261503774004
spotted-body	0.886363636364	0.113636363636	0.526315789474	0.473684210526	7.8	1	1.2	1.08
house	0.886612210993	0.113387789007	0.960203825722	0.0397961742778	54.735042735	7	3.26495726496	0.135317944842
gnat	0.88679245283	0.11320754717	0.939841089671	0.0601589103292	23.5	3	2.5	0.160024154589
peninsula of land	0.887096774194	0.112903225806	0.5625	0.4375	7.85714285714	1	0.142857142857	0.111111111111
peninsula (geog.)	0.887096774194	0.112903225806	0.5625	0.4375	7.85714285714	1	0.142857142857	0.111111111111
to open dwelling place	0.887323943662	0.112676056338	0.947368421053	0.0526315789474	7.875	1	1.125	0.0625
to decorate	0.887323943662	0.112676056338	0.947368421053	0.0526315789474	7.875	1	1.125	0.0625
decorating	0.887323943662	0.112676056338	0.947368421053	0.0526315789474	7.875	1	1.125	0.0625
fur coat	0.887658486078	0.112341513922	0.983417710847	0.0165822891532	79.0142891165	10	9.98571088354	0.168378038594
javelin	0.888246061853	0.111753938147	0.956371724636	0.0436282753641	79.4823051948	10	8.51769480519	0.388564744079
bovine animal to used as a beast of burden	0.888888888889	0.111111111111	0.0	1.0	8.0	1	0.0	0.111111111111
offspring of a moto use	0.888888888889	0.111111111111	0.0	1.0	8.0	1	0.0	0.0987654320988
mason?s shovel	0.888888888889	0.111111111111	0.925925925926	0.0740740740741	8.0	1	1.0	0.08
leather-worker?s knife	0.888888888889	0.111111111111	0.925925925926	0.0740740740741	8.0	1	1.0	0.08
to carry	0.888888888889	0.111111111111	0.925925925926	0.0740740740741	8.0	1	1.0	0.08
medieval battle-axe	0.888888888889	0.111111111111	0.925925925926	0.0740740740741	8.0	1	1.0	0.08
hunting leopard	0.888888888889	0.111111111111	0.925925925926	0.0740740740741	8.0	1	1.0	0.08
variegated	0.888888888889	0.111111111111	0.925925925926	0.0740740740741	8.0	1	1.0	0.08
carpenter?s tool	0.888888888889	0.111111111111	0.925925925926	0.0740740740741	8.0	1	1.0	0.08
transport	0.888888888889	0.111111111111	0.925925925926	0.0740740740741	8.0	1	1.0	0.08
lightly wounded	0.888888888889	0.111111111111	0.952380952381	0.047619047619	8.0	1	1.0	0.05
pustule	0.888888888889	0.111111111111	0.952380952381	0.047619047619	8.0	1	1.0	0.05
milky fluid	0.888888888889	0.111111111111	0.952380952381	0.047619047619	8.0	1	1.0	0.05
oven	0.888888888889	0.111111111111	0.977777777778	0.0222222222222	8.0	1	2.0	0.0454545454545
pillar	0.888888888889	0.111111111111	0.977777777778	0.0222222222222	8.0	1	2.0	0.0454545454545
column	0.888888888889	0.111111111111	0.977777777778	0.0222222222222	8.0	1	2.0	0.0454545454545
earthen rampart	0.888888888889	0.111111111111	0.981818181818	0.0181818181818	8.0	1	3.0	0.0555555555556
fluting	0.888888888889	0.111111111111	0.981818181818	0.0181818181818	8.0	1	3.0	0.0555555555556
rut	0.888888888889	0.111111111111	0.981818181818	0.0181818181818	8.0	1	3.0	0.0555555555556
gutter	0.888888888889	0.111111111111	0.981818181818	0.0181818181818	8.0	1	3.0	0.0555555555556
goad	0.888888888889	0.111111111111	0.984615384615	0.0153846153846	24.0	3	8.0	0.125
drawstring	0.888888888889	0.111111111111	0.987654320988	0.0123456790123	8.0	1	1.0	0.0125
shoelace	0.888888888889	0.111111111111	0.987654320988	0.0123456790123	8.0	1	1.0	0.0125
girdle	0.888888888889	0.111111111111	0.987654320988	0.0123456790123	8.0	1	1.0	0.0125
wooden carving tool	0.889447236181	0.110552763819	0.991150442478	0.00884955752212	16.0909090909	2	2.90909090909	0.025974025974
leaf	0.889763779528	0.110236220472	0.998319327731	0.00168067226891	48.4285714286	6	11.5714285714	0.0194805194805
y.bull or ox, esp. castrated	0.889908256881	0.110091743119	0.969162995595	0.0308370044053	16.1666666667	2	1.83333333333	0.0583333333333
buffalo (young)	0.889930697106	0.110069302894	0.975891064808	0.024108935192	24.2555555556	3	2.74444444444	0.0678002244669
to sacrifice cattle for the deceased	0.89010989011	0.10989010989	0.947368421053	0.0526315789474	8.1	1	0.9	0.05
herd (of horses)	0.89010989011	0.10989010989	0.947368421053	0.0526315789474	8.1	1	0.9	0.05
horse (thoroughbred)	0.89010989011	0.10989010989	0.947368421053	0.0526315789474	8.1	1	0.9	0.05
staple	0.89014084507	0.10985915493	0.997975708502	0.00202429149798	24.3076923077	3	6.69230769231	0.0135746606335
arch	0.89028224495	0.10971775505	0.972183917061	0.0278160829393	97.371541502	12	8.62845849802	0.246877070282
foliage	0.890410958904	0.109589041096	0.972222222222	0.0277777777778	8.125	1	0.875	0.025
hump	0.890410958904	0.109589041096	0.972222222222	0.0277777777778	8.125	1	0.875	0.025
bullock (uncastrated)	0.890410958904	0.109589041096	0.972222222222	0.0277777777778	8.125	1	0.875	0.025
nails	0.890410958904	0.109589041096	0.972222222222	0.0277777777778	8.125	1	0.875	0.025
shield boss	0.890410958904	0.109589041096	0.972222222222	0.0277777777778	8.125	1	0.875	0.025
ritual wrestling with an ox	0.890410958904	0.109589041096	0.972222222222	0.0277777777778	8.125	1	0.875	0.025
barley (coll.)	0.890625	0.109375	0.44776119403	0.55223880597	8.14285714286	1	0.857142857143	1.05714285714
furry	0.890625	0.109375	0.995850622407	0.00414937759336	16.2857142857	2	5.71428571429	0.0238095238095
chamois, Rupicapra rupicapra	0.89156626506	0.10843373494	0.972222222222	0.0277777777778	8.22222222222	1	0.777777777778	0.0222222222222
yak bull	0.891891891892	0.108108108108	0.952380952381	0.047619047619	8.25	1	0.75	0.0375
f. calf	0.891891891892	0.108108108108	0.952380952381	0.047619047619	8.25	1	0.75	0.0375
casing	0.891993957704	0.108006042296	0.994818057495	0.00518194250516	90.8461538462	11	14.1538461538	0.07372646329
wasp	0.89245869658	0.10754130342	0.958592116852	0.0414078831477	58.0912698413	7	4.90873015873	0.21204026326
to drink	0.89247311828	0.10752688172	0.972222222222	0.0277777777778	8.3	1	0.7	0.02
wooden part of the plow	0.89247311828	0.10752688172	0.972222222222	0.0277777777778	8.3	1	0.7	0.02
paunch	0.89247311828	0.10752688172	0.997361477573	0.00263852242744	16.6	2	2.4	0.00634920634921
potbelly	0.89247311828	0.10752688172	0.997361477573	0.00263852242744	16.6	2	2.4	0.00634920634921
strawberry	0.892720306513	0.107279693487	0.976297178069	0.0237028219312	33.2857142857	4	3.71428571429	0.0901764901765
wooden cup	0.892857142857	0.107142857143	0.952380952381	0.047619047619	8.33333333333	1	1.66666666667	0.0833333333333
big fluid spoon	0.892857142857	0.107142857143	0.952380952381	0.047619047619	8.33333333333	1	1.66666666667	0.0833333333333
big wooden spoon	0.892857142857	0.107142857143	0.952380952381	0.047619047619	8.33333333333	1	1.66666666667	0.0833333333333
pitcher	0.892857142857	0.107142857143	0.952380952381	0.047619047619	8.33333333333	1	1.66666666667	0.0833333333333
gourd ladle	0.892857142857	0.107142857143	0.952380952381	0.047619047619	8.33333333333	1	1.66666666667	0.0833333333333
ladle	0.892857142857	0.107142857143	0.952380952381	0.047619047619	8.33333333333	1	1.66666666667	0.0833333333333
copper jug	0.892857142857	0.107142857143	0.952380952381	0.047619047619	8.33333333333	1	1.66666666667	0.0833333333333
skinning	0.892857142857	0.107142857143	0.969696969697	0.030303030303	8.33333333333	1	2.66666666667	0.0833333333333
coll. hair	0.892857142857	0.107142857143	0.969696969697	0.030303030303	8.33333333333	1	2.66666666667	0.0833333333333
barrel-maker?s bent hatchet	0.892857142857	0.107142857143	0.991649269311	0.00835073068894	16.6666666667	2	6.33333333333	0.0533333333333
brittle willow	0.892898719441	0.107101280559	0.981755986317	0.018244013683	33.347826087	4	3.65217391304	0.067868504772
brave	0.893333333333	0.106666666667	0.925925925926	0.0740740740741	8.375	1	0.625	0.05
to endure	0.893333333333	0.106666666667	0.925925925926	0.0740740740741	8.375	1	0.625	0.05
strongly	0.893333333333	0.106666666667	0.925925925926	0.0740740740741	8.375	1	0.625	0.05
strong	0.893333333333	0.106666666667	0.925925925926	0.0740740740741	8.375	1	0.625	0.05
gelding	0.893603546548	0.106396453452	0.965603279273	0.0343967207271	50.3928571429	6	4.60714285714	0.164115646259
wheat grain	0.893939393939	0.106060606061	0.888888888889	0.111111111111	8.42857142857	1	0.571428571429	0.0714285714286
husk	0.893939393939	0.106060606061	0.888888888889	0.111111111111	8.42857142857	1	0.571428571429	0.0714285714286
(of cow) without calf	0.894039735099	0.105960264901	0.993975903614	0.00602409638554	25.3125	3	4.6875	0.0284090909091
donkey	0.89431741214	0.10568258786	0.321585685518	0.678414314482	110.00985681	13	35.9901431901	75.9244873762
(w.) animal	0.894426793752	0.105573206248	0.989211351825	0.010788648175	84.7210031348	10	8.2789968652	0.0902933273623
member	0.894628099174	0.105371900826	0.986132511556	0.0138674884438	25.4705882353	3	3.52941176471	0.0496323529412
bees	0.894736842105	0.105263157895	0.573913043478	0.426086956522	8.5	1	1.5	1.11363636364
ordinary rye	0.894736842105	0.105263157895	0.888888888889	0.111111111111	8.5	1	0.5	0.0625
big family	0.894736842105	0.105263157895	0.888888888889	0.111111111111	8.5	1	0.5	0.0625
people	0.894736842105	0.105263157895	0.888888888889	0.111111111111	8.5	1	0.5	0.0625
clan	0.894736842105	0.105263157895	0.888888888889	0.111111111111	8.5	1	0.5	0.0625
a kind of bushy plant	0.894736842105	0.105263157895	0.888888888889	0.111111111111	8.5	1	0.5	0.0625
wooden yoke tied to the horns of ox	0.894736842105	0.105263157895	0.99	0.01	8.5	1	1.5	0.0151515151515
submit	0.894736842105	0.105263157895	0.99	0.01	8.5	1	1.5	0.0151515151515
be humbled	0.894736842105	0.105263157895	0.99	0.01	8.5	1	1.5	0.0151515151515
(originally) be bound	0.894736842105	0.105263157895	0.99	0.01	8.5	1	1.5	0.0151515151515
build	0.894736842105	0.105263157895	0.99	0.01	8.5	1	1.5	0.0151515151515
wooden yoke for ox	0.894736842105	0.105263157895	0.99	0.01	8.5	1	1.5	0.0151515151515
subject oneself to	0.894736842105	0.105263157895	0.99	0.01	8.5	1	1.5	0.0151515151515
be harnessed	0.894736842105	0.105263157895	0.99	0.01	8.5	1	1.5	0.0151515151515
spear-grass	0.895161290323	0.104838709677	0.997613365155	0.00238663484487	17.0769230769	2	2.92307692308	0.00699300699301
winter corn	0.895161290323	0.104838709677	0.997613365155	0.00238663484487	17.0769230769	2	2.92307692308	0.00699300699301
foal	0.89530110846	0.10469889154	0.967191594188	0.032808405812	102.614393939	12	11.3856060606	0.386214671733
crumbled haypile	0.895348837209	0.104651162791	0.888888888889	0.111111111111	8.55555555556	1	0.444444444444	0.0555555555556
hay	0.895348837209	0.104651162791	0.888888888889	0.111111111111	8.55555555556	1	0.444444444444	0.0555555555556
heap of threshed cereal	0.895348837209	0.104651162791	0.888888888889	0.111111111111	8.55555555556	1	0.444444444444	0.0555555555556
s. chaff	0.895348837209	0.104651162791	0.888888888889	0.111111111111	8.55555555556	1	0.444444444444	0.0555555555556
calf (m.)	0.895505186323	0.104494813677	0.971768772806	0.0282312271942	34.2794117647	4	3.72058823529	0.108088235294
metal (esp. copper and alloys of copper)	0.89552238806	0.10447761194	0.833333333333	0.166666666667	8.57142857143	1	0.428571428571	0.0857142857143
long stick	0.895910780669	0.104089219331	0.995606809445	0.00439319055464	34.4285714286	4	10.5714285714	0.0466472303207
thin tree	0.895910780669	0.104089219331	0.995606809445	0.00439319055464	34.4285714286	4	10.5714285714	0.0466472303207
horseman	0.896875	0.103125	0.96875	0.03125	26.0909090909	3	1.90909090909	0.0615835777126
rammer	0.897435897436	0.102564102564	0.740740740741	0.259259259259	8.75	1	0.25	0.0875
pile-driver	0.897435897436	0.102564102564	0.740740740741	0.259259259259	8.75	1	0.25	0.0875
drinking straw	0.897435897436	0.102564102564	0.981818181818	0.0181818181818	8.75	1	2.25	0.0416666666667
vein	0.897435897436	0.102564102564	0.981818181818	0.0181818181818	8.75	1	2.25	0.0416666666667
cane	0.897435897436	0.102564102564	0.981818181818	0.0181818181818	8.75	1	2.25	0.0416666666667
rapeseed	0.897706137632	0.102293862368	0.957104557641	0.0428954423592	43.8787878788	5	2.12121212121	0.0950683303624
to run	0.897930534801	0.102069465199	0.957618203151	0.042381796849	123.161490683	14	27.8385093168	1.23206309421
magpie	0.897959183673	0.102040816327	0.985074626866	0.0149253731343	35.2	4	4.8	0.0727272727273
cattle (large, horned)	0.898305084746	0.101694915254	0.9625	0.0375	8.83333333333	1	1.16666666667	0.0454545454545
to pull out	0.898305084746	0.101694915254	0.9625	0.0375	8.83333333333	1	1.16666666667	0.0454545454545
shearling lamb (up to 1 year old)	0.898305084746	0.101694915254	0.9625	0.0375	8.83333333333	1	1.16666666667	0.0454545454545
nanny goat	0.898305084746	0.101694915254	0.9625	0.0375	8.83333333333	1	1.16666666667	0.0454545454545
wool to cut at autumn	0.898305084746	0.101694915254	0.9625	0.0375	8.83333333333	1	1.16666666667	0.0454545454545
greasy meat	0.898383371824	0.101616628176	0.985197659989	0.0148023400106	35.3636363636	4	8.63636363636	0.129759129759
w. (esp. of fruit)	0.898550724638	0.101449275362	0.977777777778	0.0222222222222	8.85714285714	1	1.14285714286	0.025974025974
to mix	0.898550724638	0.101449275362	0.977777777778	0.0222222222222	8.85714285714	1	1.14285714286	0.025974025974
mixed	0.898550724638	0.101449275362	0.977777777778	0.0222222222222	8.85714285714	1	1.14285714286	0.025974025974
haymaking time	0.898734177215	0.101265822785	0.555555555556	0.444444444444	8.875	1	0.125	0.1
busy period	0.898734177215	0.101265822785	0.555555555556	0.444444444444	8.875	1	0.125	0.1
game (meat)	0.89898989899	0.10101010101	0.99801980198	0.0019801980198	17.8	2	4.2	0.00833333333333
standard (military)	0.899408284024	0.100591715976	0.540540540541	0.459459459459	17.8823529412	2	0.117647058824	0.1
spelt	0.899413993964	0.100586006036	0.995283701703	0.00471629829674	62.5921855922	7	9.40781440781	0.0445803131225
pig	0.89989226949	0.10010773051	0.630981468311	0.369018531689	386.537257324	43	163.462742676	95.5983405499
fluid of plant	0.9	0.1	0.0	1.0	9.0	1	0.0	0.09
hub (of wheel)	0.9	0.1	0.491620111732	0.508379888268	9.0	1	1.0	1.03409090909
leader (goat,ram) of the pack	0.9	0.1	0.9625	0.0375	9.0	1	1.0	0.038961038961
goat kid (m.)	0.9	0.1	0.9625	0.0375	9.0	1	1.0	0.038961038961
horn of aurochs	0.9	0.1	0.9625	0.0375	9.0	1	1.0	0.038961038961
spotted animal	0.9	0.1	0.964143426295	0.0358565737052	18.0	2	2.0	0.0743801652893
tree (not log)	0.900327711614	0.0996722883862	0.991103959636	0.00889604036379	198.723336006	22	40.2766639936	0.36151891547
vineyard	0.900332225914	0.0996677740864	0.790657137877	0.209342862123	27.1	3	0.9	0.238293650794
down	0.900383141762	0.0996168582375	0.995444191344	0.00455580865604	18.0769230769	2	2.92307692308	0.0133779264214
pounder	0.900383141762	0.0996168582375	0.995444191344	0.00455580865604	18.0769230769	2	2.92307692308	0.0133779264214
club-shaped instrument for grinding food etc in a mortar	0.900383141762	0.0996168582375	0.995444191344	0.00455580865604	18.0769230769	2	2.92307692308	0.0133779264214
to burst	0.900494437577	0.0995055624227	0.997198438908	0.00280156109238	108.596273292	12	32.4037267081	0.0910360630858
cultivation	0.900826446281	0.099173553719	0.982013081395	0.0179869186047	18.1666666667	2	7.83333333333	0.14347826087
post	0.900826446281	0.099173553719	0.985025456724	0.0149745432764	18.1666666667	2	3.83333333333	0.0582750582751
s. wood	0.900826446281	0.099173553719	0.998406797663	0.0015932023367	36.3333333333	4	6.66666666667	0.0106382978723
boss of a shield	0.901234567901	0.0987654320988	0.9625	0.0375	9.125	1	0.875	0.0340909090909
goat (m.,castrated)	0.901234567901	0.0987654320988	0.9625	0.0375	9.125	1	0.875	0.0340909090909
sheep mating	0.901234567901	0.0987654320988	0.9625	0.0375	9.125	1	0.875	0.0340909090909
mule	0.901859016703	0.0981409832972	0.977119102985	0.0228808970153	36.7576923077	4	6.24230769231	0.146174196174
June	0.901907356948	0.0980926430518	0.700854700855	0.299145299145	36.7777777778	4	0.222222222222	0.0948509485095
coward	0.901960784314	0.0980392156863	0.88	0.12	9.2	1	0.8	0.109090909091
animal hair	0.902115453568	0.0978845464324	0.99422364938	0.00577635061993	27.6483516484	3	4.35164835165	0.0252826883262
fruit tree	0.902255639098	0.0977443609023	0.95652173913	0.0434782608696	18.4615384615	2	1.53846153846	0.0699300699301
pullet	0.902410173	0.0975898269999	0.971251217697	0.0287487823031	64.7287878788	7	12.2712121212	0.363224672917
to eat	0.90258302583	0.0974169741697	0.98042102164	0.0195789783601	55.5909090909	6	8.40909090909	0.167929292929
stretcher	0.902654867257	0.0973451327434	0.977777777778	0.0222222222222	9.27272727273	1	0.727272727273	0.0165289256198
carriage wheel axle	0.902654867257	0.0973451327434	0.977777777778	0.0222222222222	9.27272727273	1	0.727272727273	0.0165289256198
(w.) rabbit	0.902755267423	0.097244732577	0.604099244876	0.395900755124	37.1333333333	4	1.86666666667	1.22333333333
wheel	0.902774571811	0.0972254281889	0.482817452872	0.517182547128	83.5683760684	9	75.4316239316	80.8005575749
piglet	0.902776390831	0.0972236091685	0.649208436731	0.350791563269	306.4237293	33	41.5762706999	22.4652117387
shrub or tree of the genus Buxus	0.902777777778	0.0972222222222	0.989873417722	0.0101265822785	18.5714285714	2	2.42857142857	0.0248447204969
box	0.902777777778	0.0972222222222	0.989873417722	0.0101265822785	18.5714285714	2	2.42857142857	0.0248447204969
s. hen	0.902834008097	0.0971659919028	0.926204819277	0.0737951807229	18.5833333333	2	3.41666666667	0.272222222222
knitting tool	0.902912621359	0.0970873786408	0.9625	0.0375	9.3	1	0.7	0.0272727272727
lard	0.903070911057	0.0969290889432	0.962503142979	0.0374968570213	214.286868687	23	32.7131313131	1.27442659955
flock of breed horses	0.903225806452	0.0967741935484	0.985507246377	0.0144927536232	28.0	3	6.0	0.0882352941176
shaft of a (horizontal?) mill-wheel	0.903225806452	0.0967741935484	0.987179487179	0.0128205128205	9.33333333333	1	3.66666666667	0.047619047619
the South Pole	0.903225806452	0.0967741935484	0.987179487179	0.0128205128205	9.33333333333	1	3.66666666667	0.047619047619
the North Pole	0.903225806452	0.0967741935484	0.987179487179	0.0128205128205	9.33333333333	1	3.66666666667	0.047619047619
pivot	0.903225806452	0.0967741935484	0.987179487179	0.0128205128205	9.33333333333	1	3.66666666667	0.047619047619
the North Star	0.903225806452	0.0967741935484	0.987179487179	0.0128205128205	9.33333333333	1	3.66666666667	0.047619047619
fem. duck	0.903394255875	0.0966057441253	0.945906671456	0.0540933285439	46.7567567568	5	4.24324324324	0.242657291438
brooch	0.903492647059	0.0965073529412	0.996298788694	0.00370121130552	46.8095238095	5	11.1904761905	0.0415721844293
rooster	0.90359619246	0.0964038075401	0.440765731974	0.559234268026	140.595514148	15	73.4044858523	93.1340640561
wood(?)	0.903614457831	0.0963855421687	0.369127516779	0.630872483221	9.375	1	0.625	1.06818181818
beeswax	0.903632320237	0.0963676797628	0.486570864877	0.513429135123	28.1307692308	3	4.86923076923	5.13800788955
willow	0.90377508472	0.0962249152802	0.974906271059	0.0250937289406	93.9231884058	10	9.0768115942	0.23363379286
(m.) fox	0.903846153846	0.0961538461538	0.904109589041	0.0958904109589	18.8	2	1.2	0.127272727273
to change	0.903846153846	0.0961538461538	0.969696969697	0.030303030303	9.4	1	1.6	0.05
to chop	0.903846153846	0.0961538461538	0.969696969697	0.030303030303	9.4	1	1.6	0.05
to move	0.903846153846	0.0961538461538	0.969696969697	0.030303030303	9.4	1	1.6	0.05
lancet	0.903846153846	0.0961538461538	0.969696969697	0.030303030303	9.4	1	1.6	0.05
marrow	0.903871829105	0.0961281708945	0.995710907123	0.0042890928769	56.4166666667	6	9.58333333333	0.0412808641975
too much	0.903890160183	0.0961098398169	0.993041749503	0.00695825049702	28.2142857143	3	5.78571428571	0.0405405405405
rich	0.904243111703	0.0957568882968	0.950407469076	0.0495925309242	103.874242424	11	9.12575757576	0.476184615029
spin (thread)	0.904255319149	0.0957446808511	0.270605677887	0.729394322113	28.3333333333	3	2.66666666667	7.18777056277
rainy season	0.904347826087	0.095652173913	0.942857142857	0.0571428571429	9.45454545455	1	0.545454545455	0.0330578512397
grub	0.904347826087	0.095652173913	0.942857142857	0.0571428571429	9.45454545455	1	0.545454545455	0.0330578512397
rain	0.904347826087	0.095652173913	0.942857142857	0.0571428571429	9.45454545455	1	0.545454545455	0.0330578512397
moustache	0.904347826087	0.095652173913	0.942857142857	0.0571428571429	9.45454545455	1	0.545454545455	0.0330578512397
rain (n)	0.904347826087	0.095652173913	0.942857142857	0.0571428571429	9.45454545455	1	0.545454545455	0.0330578512397
to cut	0.904595781971	0.0954042180289	0.986823622169	0.0131763778306	322.378373016	34	60.6216269841	0.809438935087
wasteland	0.904761904762	0.0952380952381	0.984848484848	0.0151515151515	9.5	1	2.5	0.0384615384615
d?rv? grass	0.904761904762	0.0952380952381	0.984848484848	0.0151515151515	9.5	1	2.5	0.0384615384615
honeydew	0.905092592593	0.0949074074074	0.850079940967	0.149920059033	66.756097561	7	6.24390243902	1.10117434508
to work	0.905263157895	0.0947368421053	0.88	0.12	9.55555555556	1	0.444444444444	0.0606060606061
plowshare	0.905332036408	0.0946679635923	0.973037122555	0.026962877445	382.529422649	40	31.4705773511	0.872050305761
pick axe	0.905405405405	0.0945945945946	0.825	0.175	9.57142857143	1	0.428571428571	0.0909090909091
(animal) hair	0.905405405405	0.0945945945946	0.99173553719	0.00826446280992	9.57142857143	1	1.42857142857	0.0119047619048
marker stone	0.905405405405	0.0945945945946	0.99173553719	0.00826446280992	9.57142857143	1	1.42857142857	0.0119047619048
engraved stone	0.905405405405	0.0945945945946	0.99173553719	0.00826446280992	9.57142857143	1	1.42857142857	0.0119047619048
stone seat	0.905405405405	0.0945945945946	0.99173553719	0.00826446280992	9.57142857143	1	1.42857142857	0.0119047619048
rough-skinned	0.905405405405	0.0945945945946	0.99173553719	0.00826446280992	9.57142857143	1	1.42857142857	0.0119047619048
melted fat	0.905694595575	0.0943054044251	0.997917413315	0.00208258668532	76.8307692308	8	13.1692307692	0.0274833010127
goat (2-3 year old)	0.905740181269	0.0942598187311	0.843804034582	0.156195965418	19.2179487179	2	0.782051282051	0.144764957265
sacrifice	0.905882352941	0.0941176470588	0.825	0.175	9.625	1	0.375	0.0795454545455
membrane	0.906049969027	0.0939500309725	0.982427446919	0.0175725530809	96.4395604396	10	16.5604395604	0.296214447317
of copper	0.90625	0.09375	0.0	1.0	29.0	3	0.0	0.100694444444
owl (?)	0.90625	0.09375	0.386138613861	0.613861386139	9.66666666667	1	1.33333333333	2.11965811966
ointment	0.906521264839	0.0934787351615	0.987097791931	0.0129022080692	106.673821549	11	17.3261784512	0.226467895328
tawny owl	0.906523855891	0.0934761441091	0.50219210841	0.49780789159	38.7916666667	4	0.208333333333	0.206514550265
bear cub	0.906542056075	0.0934579439252	0.825	0.175	9.7	1	0.3	0.0636363636364
sledgehammer	0.906614785992	0.0933852140078	0.957036274762	0.042963725238	29.125	3	3.875	0.173958333333
cold (of weather)	0.906779661017	0.0932203389831	0.825	0.175	9.72727272727	1	0.272727272727	0.0578512396694
cloak	0.906849315068	0.0931506849315	0.973941368078	0.0260586319218	19.4705882353	2	1.52941176471	0.0409207161125
midge	0.906976744186	0.093023255814	0.968421052632	0.0315789473684	19.5	2	1.5	0.0489130434783
thigh	0.906976744186	0.093023255814	0.99173553719	0.00826446280992	9.75	1	1.25	0.0104166666667
car	0.907184884395	0.0928151156045	0.929710978275	0.0702890217249	78.1928571429	8	14.8071428571	1.11946573751
to solve	0.907216494845	0.0927835051546	0.95652173913	0.0434782608696	9.77777777778	1	1.22222222222	0.0555555555556
to judge	0.907216494845	0.0927835051546	0.95652173913	0.0434782608696	9.77777777778	1	1.22222222222	0.0555555555556
blacksmith's hammer	0.907216494845	0.0927835051546	0.95652173913	0.0434782608696	9.77777777778	1	1.22222222222	0.0555555555556
swallow	0.907407407407	0.0925925925926	0.733333333333	0.266666666667	9.8	1	0.2	0.0727272727273
flagstaff	0.907482193994	0.0925178060063	0.988794334849	0.0112056651508	58.8523809524	6	9.14761904762	0.103666811552
to whet	0.907692307692	0.0923076923077	0.954545454545	0.0454545454545	9.83333333333	1	1.16666666667	0.0555555555556
shrewd	0.907692307692	0.0923076923077	0.954545454545	0.0454545454545	9.83333333333	1	1.16666666667	0.0555555555556
clever	0.907692307692	0.0923076923077	0.954545454545	0.0454545454545	9.83333333333	1	1.16666666667	0.0555555555556
to sharpen	0.907692307692	0.0923076923077	0.954545454545	0.0454545454545	9.83333333333	1	1.16666666667	0.0555555555556
tree (coll.)	0.907790143084	0.0922098569157	0.992666130042	0.00733386995796	88.6034482759	9	17.3965517241	0.128526645768
thread	0.907800248825	0.0921997511748	0.980953929672	0.0190460703281	196.920325111	20	16.079674889	0.312200817517
apple-tree	0.90780809031	0.0921919096896	0.926050420168	0.0739495798319	68.9285714286	7	2.07142857143	0.165413533835
solitary pig	0.908163265306	0.0918367346939	0.0916666666667	0.908333333333	9.88888888889	1	0.111111111111	1.10101010101
(ceramic) pot	0.908163265306	0.0918367346939	0.521739130435	0.478260869565	9.88888888889	1	1.11111111111	1.01851851852
brood sow	0.908163265306	0.0918367346939	0.55	0.45	9.88888888889	1	0.111111111111	0.0909090909091
combined spear and battle axe	0.908163265306	0.0918367346939	0.961977186312	0.0380228136882	19.7777777778	2	1.22222222222	0.048309178744
thick thread	0.908256880734	0.0917431192661	0.95652173913	0.0434782608696	9.9	1	1.1	0.05
bag-sewing needle	0.908256880734	0.0917431192661	0.95652173913	0.0434782608696	9.9	1	1.1	0.05
rug for cleaning feet	0.908256880734	0.0917431192661	0.95652173913	0.0434782608696	9.9	1	1.1	0.05
ditch	0.908257152343	0.0917428476571	0.991650773729	0.00834922627111	168.300548589	17	33.6994514107	0.28373329855
ram	0.908330874883	0.0916691251167	0.535997592759	0.464002407241	406.260731984	41	101.739268016	88.0736516511
mole	0.908333333333	0.0916666666667	0.55	0.45	9.90909090909	1	0.0909090909091	0.0743801652893
red copper	0.908333333333	0.0916666666667	0.55	0.45	9.90909090909	1	0.0909090909091	0.0743801652893
frog	0.908333333333	0.0916666666667	0.55	0.45	9.90909090909	1	0.0909090909091	0.0743801652893
flute	0.908430232558	0.0915697674419	0.972571303683	0.0274286963173	29.7619047619	3	4.2380952381	0.119523809524
to drag	0.908450704225	0.0915492957746	0.991525423729	0.00847457627119	29.7692307692	3	6.23076923077	0.0532544378698
fem. deer	0.908500263526	0.0914997364742	0.97726038261	0.02273961739	218.437850946	22	21.5621490537	0.501724032113
winter wheat	0.908931698774	0.0910683012259	0.88939740656	0.11060259344	19.9615384615	2	2.03846153846	0.253496503497
dragon	0.909049668986	0.0909503310137	0.987206159742	0.0127938402578	209.89525641	21	30.1047435897	0.39014675576
solitary	0.909090909091	0.0909090909091	0.0	1.0	10.0	1	0.0	0.10101010101
to be to broody (of a hen)	0.909090909091	0.0909090909091	0.95652173913	0.0434782608696	10.0	1	1.0	0.0454545454545
mother of (w. bird's) chick	0.909090909091	0.0909090909091	0.95652173913	0.0434782608696	10.0	1	1.0	0.0454545454545
bullet	0.909090909091	0.0909090909091	0.969696969697	0.030303030303	10.0	1	1.0	0.03125
arrow esp. the shorter and stouter kind fired from cross-bows	0.909090909091	0.0909090909091	0.969696969697	0.030303030303	10.0	1	1.0	0.03125
cross-bow bolt	0.909090909091	0.0909090909091	0.969696969697	0.030303030303	10.0	1	1.0	0.03125
round	0.909090909091	0.0909090909091	0.990175762906	0.00982423709358	80.0	8	9.0	0.0892953929539
louse	0.909090909091	0.0909090909091	0.996204933586	0.00379506641366	20.0	2	3.0	0.0114285714286
jackal	0.909261293867	0.0907387061333	0.320217255802	0.679782744198	90.1858974359	9	9.8141025641	20.834160096
part	0.909780896463	0.0902191035372	0.987516259603	0.0124837403968	60.5047619048	6	8.49523809524	0.107393013491
stone of hazelnut	0.90990990991	0.0900900900901	0.981818181818	0.0181818181818	10.1	1	0.9	0.0166666666667
fruit	0.909980365358	0.0900196346425	0.948737921637	0.0512620783627	131.412938929	13	8.58706107136	0.46397491605
cereal for alimentry purposes	0.910034602076	0.0899653979239	0.989010989011	0.010989010989	20.2307692308	2	2.76923076923	0.0307692307692
meat of kid	0.910204081633	0.0897959183673	0.844036697248	0.155963302752	20.2727272727	2	0.727272727273	0.134387351779
wooden piece to which the plowshare of plow is to fixed	0.910447761194	0.089552238806	0.993055555556	0.00694444444444	10.1666666667	1	1.83333333333	0.0128205128205
shoemaker?s last	0.910447761194	0.089552238806	0.993055555556	0.00694444444444	10.1666666667	1	1.83333333333	0.0128205128205
pale	0.910447761194	0.089552238806	0.993055555556	0.00694444444444	10.1666666667	1	1.83333333333	0.0128205128205
wooden axle of a wagon	0.910447761194	0.089552238806	0.993055555556	0.00694444444444	10.1666666667	1	1.83333333333	0.0128205128205
tree-stump	0.910447761194	0.089552238806	0.993055555556	0.00694444444444	10.1666666667	1	1.83333333333	0.0128205128205
pet name of a dog	0.910714285714	0.0892857142857	0.969696969697	0.030303030303	10.2	1	0.8	0.025
pet name for a dog	0.910714285714	0.0892857142857	0.969696969697	0.030303030303	10.2	1	0.8	0.025
y. chicken	0.910714285714	0.0892857142857	0.999341238472	0.000658761528327	30.6	3	7.4	0.00487804878049
pickaxe	0.910741167095	0.0892588329053	0.958189735604	0.041810264396	81.626984127	8	8.37301587302	0.365353535354
ugly	0.910891089109	0.0891089108911	0.954545454545	0.0454545454545	10.2222222222	1	0.777777777778	0.037037037037
horrible animal	0.910891089109	0.0891089108911	0.954545454545	0.0454545454545	10.2222222222	1	0.777777777778	0.037037037037
w. cattle	0.910891089109	0.0891089108911	0.954545454545	0.0454545454545	10.2222222222	1	0.777777777778	0.037037037037
mountain antelope	0.910891089109	0.0891089108911	0.954545454545	0.0454545454545	10.2222222222	1	0.777777777778	0.037037037037
slate	0.911111111111	0.0888888888889	0.994535519126	0.00546448087432	20.5	2	3.5	0.0192307692308
flat stone	0.911111111111	0.0888888888889	0.994535519126	0.00546448087432	20.5	2	3.5	0.0192307692308
lamb	0.91112717945	0.0888728205504	0.486953121949	0.513046878051	287.05695247	28	72.9430475304	76.8517566153
stone	0.911368646845	0.088631353155	0.517001132887	0.482998867113	282.77394958	27.5	103.72605042	96.9041683978
gannet	0.911392405063	0.0886075949367	0.909090909091	0.0909090909091	10.2857142857	1	0.714285714286	0.0714285714286
grease	0.911691178047	0.0883088219526	0.665844857863	0.334155142137	258.097423872	25	83.9025761276	42.1066212655
m. cat	0.912060301508	0.0879396984925	0.235102040816	0.764897959184	51.8571428571	5	0.142857142857	0.464781746032
glow	0.912087912088	0.0879120879121	0.997248968363	0.00275103163686	20.75	2	6.25	0.0172413793103
corn-field	0.912225705329	0.0877742946708	0.967741935484	0.0322580645161	20.7857142857	2	2.21428571429	0.0738095238095
(arable) land	0.912363067293	0.0876369327074	0.745069928956	0.254930071044	20.8214285714	2	9.17857142857	3.14050235479
arrow	0.912659730462	0.0873402695378	0.517796599616	0.482203400384	250.787336094	24	74.2126639061	69.1113053149
to be on the surface of something	0.912790697674	0.0872093023256	0.998330550918	0.0016694490818	20.9333333333	2	3.06666666667	0.00512820512821
outskirts	0.912790697674	0.0872093023256	0.998330550918	0.0016694490818	20.9333333333	2	3.06666666667	0.00512820512821
estate	0.912790697674	0.0872093023256	0.998330550918	0.0016694490818	20.9333333333	2	3.06666666667	0.00512820512821
to tremble	0.913043478261	0.0869565217391	0.979020979021	0.020979020979	10.5	1	2.5	0.0535714285714
to bristle	0.913043478261	0.0869565217391	0.979020979021	0.020979020979	10.5	1	2.5	0.0535714285714
to turn	0.913190258018	0.0868097419822	0.978619262788	0.0213807372122	63.1166666667	6	8.88333333333	0.194081828134
curds	0.913385826772	0.0866141732283	0.301507537688	0.698492462312	10.5454545455	1	0.454545454545	1.05303030303
village	0.913793103448	0.0862068965517	0.981419166057	0.0185808339429	42.4	4	8.6	0.162820512821
loathsome person	0.913793103448	0.0862068965517	0.988439306358	0.0115606936416	21.2	2	3.8	0.0444444444444
shame	0.913793103448	0.0862068965517	0.988439306358	0.0115606936416	21.2	2	3.8	0.0444444444444
disgrace	0.913793103448	0.0862068965517	0.988439306358	0.0115606936416	21.2	2	3.8	0.0444444444444
nausea	0.913793103448	0.0862068965517	0.988439306358	0.0115606936416	21.2	2	3.8	0.0444444444444
ground	0.913858949334	0.0861410506662	0.979525986099	0.020474013901	74.2620689655	7	12.7379310345	0.266247736937
tree trunk	0.913875598086	0.0861244019139	0.934841141626	0.0651588583737	31.8333333333	3	5.16666666667	0.360119047619
a weapon short spear	0.913978494624	0.0860215053763	0.993055555556	0.00694444444444	10.625	1	1.375	0.00961538461538
horse (gen.)	0.914025184542	0.0859748154581	0.0893671635897	0.91063283641	31.8939393939	3	1.10606060606	11.2705278592
buttermilk	0.9140625	0.0859375	0.872727272727	0.127272727273	10.6363636364	1	0.363636363636	0.0530303030303
fat skimmed over kharco and millet-hominy	0.9140625	0.0859375	0.872727272727	0.127272727273	10.6363636364	1	0.363636363636	0.0530303030303
stew of milk	0.9140625	0.0859375	0.872727272727	0.127272727273	10.6363636364	1	0.363636363636	0.0530303030303
mountain chain	0.9140625	0.0859375	0.947368421053	0.0526315789474	42.5454545455	4	1.45454545455	0.0808080808081
shaft bow	0.9140625	0.0859375	0.977443609023	0.0225563909774	21.2727272727	2	2.72727272727	0.0629370629371
bow (between cart-handle	0.9140625	0.0859375	0.977443609023	0.0225563909774	21.2727272727	2	2.72727272727	0.0629370629371
to twist	0.914088031418	0.085911968582	0.99398434738	0.00601565261976	170.23714791	16	19.7628520904	0.119605960864
pasture	0.914114687256	0.085885312744	0.991705918493	0.00829408150727	106.434343434	10	19.5656565657	0.163636363636
hawk	0.914465408805	0.085534591195	0.673076923077	0.326923076923	21.3823529412	2	0.617647058824	0.3
bear	0.914611950454	0.0853880495455	0.179962915325	0.820037084675	74.9786848073	7	19.0213151927	86.6744341697
the corresponding vessel	0.914893617021	0.0851063829787	0.969230769231	0.0307692307692	10.75	1	2.25	0.0714285714286
measure of volume for dry goods esp. grain	0.914893617021	0.0851063829787	0.969230769231	0.0307692307692	10.75	1	2.25	0.0714285714286
egg yolk	0.914893617021	0.0851063829787	0.969230769231	0.0307692307692	10.75	1	2.25	0.0714285714286
measured amount	0.914893617021	0.0851063829787	0.969230769231	0.0307692307692	10.75	1	2.25	0.0714285714286
size	0.914893617021	0.0851063829787	0.969230769231	0.0307692307692	10.75	1	2.25	0.0714285714286
mast-hole	0.914893617021	0.0851063829787	0.969230769231	0.0307692307692	10.75	1	2.25	0.0714285714286
nave of a wheel	0.914893617021	0.0851063829787	0.969230769231	0.0307692307692	10.75	1	2.25	0.0714285714286
unit of measurement	0.914893617021	0.0851063829787	0.969230769231	0.0307692307692	10.75	1	2.25	0.0714285714286
axle in an oil press	0.914893617021	0.0851063829787	0.969230769231	0.0307692307692	10.75	1	2.25	0.0714285714286
limit	0.914893617021	0.0851063829787	0.969230769231	0.0307692307692	10.75	1	2.25	0.0714285714286
stalk	0.915509957755	0.084490042245	0.940425570605	0.0595744293953	54.1785714286	5	3.82142857143	0.242081280788
man	0.915588069781	0.0844119302195	0.998659260678	0.00134073932197	65.08	6	7.92	0.0106329113924
pulp of fruit	0.915654952077	0.0843450479233	0.984452254425	0.0155477455746	65.1363636364	6	8.86363636364	0.13998603023
sheep (sing.)	0.915789473684	0.0842105263158	0.975	0.025	10.875	1	1.125	0.0288461538462
to be born (of cattle)	0.915789473684	0.0842105263158	0.975	0.025	10.875	1	1.125	0.0288461538462
pit	0.915887850467	0.0841121495327	0.973079448457	0.026920551543	32.6666666667	3	6.33333333333	0.175213675214
August	0.915966386555	0.0840336134454	0.988041560478	0.0119584395217	21.8	2	4.2	0.0508333333333
fat (organic substance)	0.916081094376	0.0839189056239	0.937673884673	0.0623261153275	185.576521627	17	33.4234783735	2.22162054612
hammer	0.916232187194	0.083767812806	0.971689335009	0.0283106649905	109.377594628	10	13.6224053724	0.396895737113
criminal	0.916279069767	0.0837209302326	0.996485061511	0.00351493848858	43.7777777778	4	6.22222222222	0.0219478737997
snow white	0.916666666667	0.0833333333333	0.962962962963	0.037037037037	11.0	1	1.0	0.0384615384615
milk white	0.916666666667	0.0833333333333	0.962962962963	0.037037037037	11.0	1	1.0	0.0384615384615
a kind of white grape	0.916666666667	0.0833333333333	0.962962962963	0.037037037037	11.0	1	1.0	0.0384615384615
white cow	0.916666666667	0.0833333333333	0.962962962963	0.037037037037	11.0	1	1.0	0.0384615384615
silver coin	0.916666666667	0.0833333333333	0.962962962963	0.037037037037	11.0	1	1.0	0.0384615384615
small	0.91707798618	0.0829220138203	0.955722235664	0.0442777643358	33.1785714286	3	2.82142857143	0.130714285714
to spin (thread)	0.917235106867	0.0827648931332	0.591469194313	0.408530805687	22.1648351648	2	11.8351648352	8.1746090448
chair	0.917293233083	0.0827067669173	0.984848484848	0.0151515151515	11.0909090909	1	0.909090909091	0.013986013986
long chair	0.917293233083	0.0827067669173	0.984848484848	0.0151515151515	11.0909090909	1	0.909090909091	0.013986013986
throne	0.917293233083	0.0827067669173	0.984848484848	0.0151515151515	11.0909090909	1	0.909090909091	0.013986013986
wooden oar	0.917293233083	0.0827067669173	0.984848484848	0.0151515151515	11.0909090909	1	0.909090909091	0.013986013986
chariot handle	0.917525773196	0.0824742268041	0.994974874372	0.00502512562814	22.25	2	2.75	0.0138888888889
place	0.9176201373	0.0823798627002	0.910588235294	0.0894117647059	33.4166666667	3	3.58333333333	0.351851851852
fem. deer (gen.)	0.917695473251	0.082304526749	0.935721812434	0.0642781875659	22.3	2	3.7	0.254166666667
autumn	0.917706059033	0.0822939409673	0.473110179429	0.526889820571	223.031258011	20	52.9687419887	58.9898340297
horse	0.917767345479	0.0822326545214	0.381079295479	0.618920704521	189.730526929	17	71.2694730708	115.750587889
yoke	0.917799752781	0.0822002472188	0.370070876609	0.629929123391	55.8270676692	5	44.1729323308	75.1905061965
female lamb	0.917808219178	0.0821917808219	0.984848484848	0.0151515151515	11.1666666667	1	0.833333333333	0.0128205128205
young fem. sheep	0.917808219178	0.0821917808219	0.984848484848	0.0151515151515	11.1666666667	1	0.833333333333	0.0128205128205
sheep that has not yet dropped a lamb	0.917808219178	0.0821917808219	0.984848484848	0.0151515151515	11.1666666667	1	0.833333333333	0.0128205128205
bee	0.917882391198	0.0821176088021	0.285896600992	0.714103399008	178.842497649	16	31.1575023505	77.8242142644
plait	0.917933130699	0.0820668693009	0.875817410444	0.124182589556	44.7407407407	4	3.25925925926	0.462132003799
fool (of a person)	0.918032786885	0.0819672131148	0.969230769231	0.0307692307692	11.2	1	1.8	0.0571428571429
red-brown	0.918032786885	0.0819672131148	0.969230769231	0.0307692307692	11.2	1	1.8	0.0571428571429
(pej.) bad horse	0.918032786885	0.0819672131148	0.969230769231	0.0307692307692	11.2	1	1.8	0.0571428571429
flame coloured	0.918032786885	0.0819672131148	0.969230769231	0.0307692307692	11.2	1	1.8	0.0571428571429
young donkey	0.918032786885	0.0819672131148	0.969230769231	0.0307692307692	11.2	1	1.8	0.0571428571429
pebble	0.918174004393	0.0818259956069	0.936345365633	0.0636546343669	67.3263305322	6	8.67366946779	0.589653432223
barrow	0.918353733362	0.0816462666381	0.995763497541	0.00423650245946	191.215276705	17	18.7847232947	0.0799201081733
wooden beam	0.918367346939	0.0816326530612	0.991568296796	0.00843170320405	22.5	2	3.5	0.0297619047619
oats	0.918450471839	0.0815495281606	0.406974042255	0.593025957745	180.199786325	16	46.8002136752	68.1953605287
rape	0.918669131238	0.0813308687616	0.959849435383	0.0401505646173	45.1818181818	4	1.81818181818	0.07605466429
mealtime at a wedding	0.918699186992	0.0813008130081	0.947916666667	0.0520833333333	11.3	1	0.7	0.0384615384615
gazelle	0.91875	0.08125	0.964230171073	0.0357698289269	22.6153846154	2	2.38461538462	0.0884615384615
stag	0.918765200184	0.0812347998156	0.990296682691	0.00970331730867	203.57991453	18	19.4200854701	0.190285653553
bovine	0.918823269719	0.081176730281	0.992473574021	0.00752642597884	339.564035114	30	37.4359648859	0.283895738925
an anthroponym	0.918918918919	0.0810810810811	0.614035087719	0.385964912281	11.3333333333	1	1.66666666667	1.04761904762
s. horse	0.919028340081	0.080971659919	0.980371352785	0.0196286472149	22.7	2	3.3	0.0660714285714
to winnow in a trough	0.919191919192	0.0808080808081	0.902777777778	0.0972222222222	11.375	1	0.625	0.0673076923077
eagle-owl, Strix bubo	0.919642857143	0.0803571428571	0.902777777778	0.0972222222222	11.4444444444	1	0.555555555556	0.0598290598291
tumour	0.919642857143	0.0803571428571	0.902777777778	0.0972222222222	11.4444444444	1	0.555555555556	0.0598290598291
swelling	0.919642857143	0.0803571428571	0.902777777778	0.0972222222222	11.4444444444	1	0.555555555556	0.0598290598291
horned or eagle-owl	0.919642857143	0.0803571428571	0.902777777778	0.0972222222222	11.4444444444	1	0.555555555556	0.0598290598291
s. and inferior kind of horse	0.92	0.08	0.994082840237	0.00591715976331	11.5	1	1.5	0.00892857142857
l. donkey stallion	0.92	0.08	0.994082840237	0.00591715976331	11.5	1	1.5	0.00892857142857
s. and inferior kind of horse bred and used chiefly in Ireland and Scotland	0.92	0.08	0.994082840237	0.00591715976331	11.5	1	1.5	0.00892857142857
mirage	0.920367534456	0.0796324655436	0.995850622407	0.00414937759336	46.2307692308	4	14.7692307692	0.0615384615385
spirit	0.920367534456	0.0796324655436	0.995850622407	0.00414937759336	46.2307692308	4	14.7692307692	0.0615384615385
grass snake	0.920542478172	0.0794575218282	0.960087715928	0.0399122840719	127.43875	11	8.56125	0.355903982878
fence	0.920604914934	0.0793950850662	0.962143577611	0.0378564223888	46.380952381	4	4.61904761905	0.181740669241
ground grains	0.920731707317	0.0792682926829	0.902777777778	0.0972222222222	11.6153846154	1	0.384615384615	0.0414201183432
snake	0.920749068649	0.0792509313513	0.563731493993	0.436268506007	162.654075369	14	128.345924631	99.3261603929
cow	0.920957787428	0.0790422125725	0.543831648801	0.456168351199	396.149902102	34	90.8500978978	76.2054570668
y. pig	0.920971300047	0.0790286999531	0.982081869197	0.017918130803	128.18993994	11	17.8100600601	0.324945399945
stalk of flax	0.921052631579	0.0789473684211	0.975903614458	0.0240963855422	23.3333333333	2	1.66666666667	0.0411522633745
kernel	0.921146203723	0.0788537962769	0.99268738574	0.0073126142596	151.862068966	13	16.1379310345	0.118879786626
plant disease	0.921229586936	0.0787704130644	0.98453038674	0.0154696132597	70.1707317073	6	4.82926829268	0.0758807588076
fem. (fallow) deer	0.92125984252	0.0787401574803	0.962962962963	0.037037037037	11.7	1	1.3	0.05
strip of land	0.92125984252	0.0787401574803	0.981818181818	0.0181818181818	23.4	2	3.6	0.0666666666667
piece of ice	0.92125984252	0.0787401574803	0.981818181818	0.0181818181818	23.4	2	3.6	0.0666666666667
treeless land	0.92125984252	0.0787401574803	0.981818181818	0.0181818181818	23.4	2	3.6	0.0666666666667
clod of earth	0.92125984252	0.0787401574803	0.981818181818	0.0181818181818	23.4	2	3.6	0.0666666666667
apple tree	0.921348314607	0.0786516853933	0.896639389847	0.103360610153	70.2857142857	6	4.71428571429	0.543441938179
snow leopard	0.921412446224	0.078587553776	0.857212061189	0.142787938811	70.3479674797	6	1.65203252033	0.275183153745
to scratch	0.921486223212	0.0785137767882	0.974655382829	0.0253446171707	152.576036866	13	18.4239631336	0.479090661802
chicken (gen.)	0.921684932653	0.0783150673471	0.707624833992	0.292375166008	217.725296443	18.5	49.7747035573	20.5658231827
remains of whey	0.921875	0.078125	0.994082840237	0.00591715976331	11.8	1	1.2	0.00714285714286
fluid remains of boiling	0.921875	0.078125	0.994082840237	0.00591715976331	11.8	1	1.2	0.00714285714286
cheese whey	0.921875	0.078125	0.994082840237	0.00591715976331	11.8	1	1.2	0.00714285714286
curd	0.921875	0.078125	0.994082840237	0.00591715976331	11.8	1	1.2	0.00714285714286
butter (melted)	0.921875	0.078125	0.994082840237	0.00591715976331	11.8	1	1.2	0.00714285714286
whey of curd	0.921875	0.078125	0.994082840237	0.00591715976331	11.8	1	1.2	0.00714285714286
chick	0.921875	0.078125	0.994185444036	0.00581455596366	47.2	4	7.8	0.0456187895212
to hang	0.921875	0.078125	0.99703264095	0.00296735905045	23.6	2	2.4	0.00714285714286
children	0.922077922078	0.0779220779221	0.679442508711	0.320557491289	11.8333333333	1	2.16666666667	1.02222222222
fodder	0.922390609733	0.0776093902669	0.988417036085	0.0115829639154	166.390542328	14	22.609457672	0.264953478948
greasy	0.9225817551	0.0774182448997	0.992804379244	0.00719562075585	119.168518519	10	18.8314814815	0.136486302684
wine	0.922672277749	0.0773277222514	0.273648605772	0.726351394228	83.5238095238	7	22.4761904762	59.6590369729
vehicle	0.922750096562	0.0772499034376	0.978216977746	0.0217830222541	119.45	10	8.55	0.190392156863
bull	0.92297281661	0.0770271833904	0.484704766171	0.515295233829	407.402612733	34	79.5973872667	84.6209015186
least weasel	0.923076923077	0.0769230769231	0.0	1.0	12.0	1	0.0	0.0710059171598
virgin	0.923076923077	0.0769230769231	0.989010989011	0.010989010989	12.0	1	2.0	0.0222222222222
girl	0.923076923077	0.0769230769231	0.989010989011	0.010989010989	12.0	1	2.0	0.0222222222222
fruit (of tree)	0.923076923077	0.0769230769231	0.989010989011	0.010989010989	12.0	1	2.0	0.0222222222222
wet nurse	0.923076923077	0.0769230769231	0.989010989011	0.010989010989	12.0	1	2.0	0.0222222222222
seed-head of the flax plant	0.923076923077	0.0769230769231	0.989010989011	0.010989010989	12.0	1	2.0	0.0222222222222
a single fruit of any species that agricultural produces fleshy fruit	0.923076923077	0.0769230769231	0.989010989011	0.010989010989	12.0	1	2.0	0.0222222222222
a single grape	0.923076923077	0.0769230769231	0.989010989011	0.010989010989	12.0	1	2.0	0.0222222222222
suckling (ewe)	0.923076923077	0.0769230769231	0.989010989011	0.010989010989	12.0	1	2.0	0.0222222222222
to such	0.923076923077	0.0769230769231	0.989010989011	0.010989010989	12.0	1	2.0	0.0222222222222
metal	0.923437885898	0.0765621141022	0.964667262629	0.0353327373712	60.3064516129	5	7.6935483871	0.281790556335
brutal person	0.923482849604	0.0765171503958	0.992907801418	0.00709219858156	60.3448275862	5	9.65517241379	0.0689655172414
hops	0.923495123865	0.076504876135	0.169037108452	0.830962891548	84.4974358974	7	10.5025641026	51.6291429454
to smear	0.923546930472	0.0764530695278	0.995625457853	0.00437454214714	108.719276094	9	17.2807239057	0.0759274026818
turnip	0.923769082146	0.0762309178539	0.421677937303	0.578322062697	48.4721479501	4	33.5278520499	45.982715338
one with big ears	0.92380952381	0.0761904761905	0.451612903226	0.548387096774	12.125	1	0.875	1.0625
heart (organ)	0.923854848305	0.0761451516954	0.873611111111	0.126388888889	48.53125	4	3.46875	0.501838235294
bunch of grape	0.924203979831	0.0757960201691	0.969707975823	0.0302920241774	73.1598290598	6	8.84017094017	0.276151871005
tooth	0.924369747899	0.0756302521008	0.945454545455	0.0545454545455	36.6666666667	3	4.33333333333	0.25
a kid of a year old	0.924528301887	0.0754716981132	0.923076923077	0.0769230769231	12.25	1	0.75	0.0625
unsignificant	0.924528301887	0.0754716981132	0.923076923077	0.0769230769231	12.25	1	0.75	0.0625
shaft of a vessel	0.924528301887	0.0754716981132	0.923076923077	0.0769230769231	12.25	1	0.75	0.0625
y. roe-deer	0.924528301887	0.0754716981132	0.923076923077	0.0769230769231	12.25	1	0.75	0.0625
spear	0.924699755104	0.0753002448962	0.422955068741	0.577044931259	294.724063024	24	85.2759369761	116.343438883
time	0.924855491329	0.0751445086705	0.990990990991	0.00900900900901	24.6153846154	2	3.38461538462	0.0307692307692
coulter (plow blade)	0.925	0.075	0.986842105263	0.0131578947368	24.6666666667	2	3.33333333333	0.0444444444444
split	0.925	0.075	0.986842105263	0.0131578947368	24.6666666667	2	3.33333333333	0.0444444444444
to gain	0.925	0.075	0.999479437793	0.000520562207184	61.6666666667	5	13.3333333333	0.00694444444444
tip	0.925106382979	0.0748936170213	0.98428006558	0.0157199344199	49.4090909091	4	8.59090909091	0.137205387205
hare	0.925383898672	0.0746161013282	0.30308633511	0.69691366489	111.617398119	9	32.3826018809	74.4602284602
root crop	0.925438596491	0.0745614035088	0.998766954377	0.00123304562269	24.8235294118	2	3.17647058824	0.00392156862745
hyena	0.925450027274	0.0745499727256	0.870649760718	0.129350239282	74.4829268293	6	2.51707317073	0.373955213236
buck	0.925451008525	0.0745489914749	0.982043148808	0.0179568511917	521.387903298	42	42.6120967025	0.779170528689
blubber	0.925531914894	0.0744680851064	0.982142857143	0.0178571428571	12.4285714286	1	1.57142857143	0.0285714285714
soft fat	0.925531914894	0.0744680851064	0.982142857143	0.0178571428571	12.4285714286	1	1.57142857143	0.0285714285714
fat (of animals, esp. pigs)	0.925531914894	0.0744680851064	0.982142857143	0.0178571428571	12.4285714286	1	1.57142857143	0.0285714285714
w. duck	0.925802139037	0.0741978609626	0.90251572327	0.0974842767296	37.4324324324	3	0.567567567568	0.0613052076467
meat of this species	0.925925925926	0.0740740740741	0.964285714286	0.0357142857143	12.5	1	1.5	0.0555555555556
battle	0.925925925926	0.0740740740741	0.967741935484	0.0322580645161	12.5	1	2.5	0.0833333333333
stretch of level ground	0.925925925926	0.0740740740741	0.967741935484	0.0322580645161	12.5	1	2.5	0.0833333333333
piece of ground	0.925925925926	0.0740740740741	0.967741935484	0.0322580645161	12.5	1	2.5	0.0833333333333
field (poet.)	0.925925925926	0.0740740740741	0.989010989011	0.010989010989	12.5	1	1.5	0.0166666666667
floodplain	0.925925925926	0.0740740740741	0.989010989011	0.010989010989	12.5	1	1.5	0.0166666666667
white pieces of bark	0.926136363636	0.0738636363636	0.923076923077	0.0769230769231	12.5384615385	1	0.461538461538	0.0384615384615
scaly	0.926136363636	0.0738636363636	0.923076923077	0.0769230769231	12.5384615385	1	0.461538461538	0.0384615384615
one-year-old m. kid or lamb	0.926315789474	0.0736842105263	0.974025974026	0.025974025974	12.5714285714	1	1.42857142857	0.0380952380952
shoulder	0.926332565964	0.0736674340358	0.964269123568	0.0357308764323	100.596153846	8	8.40384615385	0.311403508772
white sap of certain fruit or plants	0.926406926407	0.0735930735931	0.911627906977	0.0883720930233	25.1764705882	2	0.823529411765	0.0798319327731
bag	0.926727108133	0.0732728918674	0.996865911471	0.00313408852886	126.476120229	10	17.5238797713	0.0550940602346
maturity	0.926829268293	0.0731707317073	0.807692307692	0.192307692308	12.6666666667	1	0.333333333333	0.0793650793651
summery	0.926829268293	0.0731707317073	0.807692307692	0.192307692308	12.6666666667	1	0.333333333333	0.0793650793651
rape plant	0.926940639269	0.0730593607306	0.964194373402	0.0358056265985	25.375	2	1.625	0.0603448275862
brassica napus	0.926940639269	0.0730593607306	0.964194373402	0.0358056265985	25.375	2	1.625	0.0603448275862
y. calf	0.926966292135	0.0730337078652	0.225806451613	0.774193548387	12.6923076923	1	0.307692307692	1.05494505495
claw	0.927014531044	0.0729854689564	0.979949388283	0.0200506117168	76.2081447964	6	9.79185520362	0.200349823187
skin bottle	0.927083333333	0.0729166666667	0.717948717949	0.282051282051	12.7142857143	1	0.285714285714	0.112244897959
(esp. of beer) made from hops	0.927272727273	0.0727272727273	0.807692307692	0.192307692308	12.75	1	0.25	0.0595238095238
kind of silver-adorned weapon	0.927272727273	0.0727272727273	0.974025974026	0.025974025974	12.75	1	1.25	0.0333333333333
hook-bladed axe	0.927272727273	0.0727272727273	0.974025974026	0.025974025974	12.75	1	1.25	0.0333333333333
y. of cow or deer	0.927374301676	0.072625698324	0.807692307692	0.192307692308	12.7692307692	1	0.230769230769	0.0549450549451
clumsy person or animal	0.927374301676	0.072625698324	0.807692307692	0.192307692308	12.7692307692	1	0.230769230769	0.0549450549451
to hew	0.927396245855	0.0726037541453	0.992453467616	0.00754653238372	140.507317073	11	20.4926829268	0.15582463096
he-goat (young)	0.927419354839	0.0725806451613	0.982142857143	0.0178571428571	12.7777777778	1	1.22222222222	0.0222222222222
kid goat (1 year old)	0.927419354839	0.0725806451613	0.982142857143	0.0178571428571	12.7777777778	1	1.22222222222	0.0222222222222
sheep (m.	0.927419354839	0.0725806451613	0.982142857143	0.0178571428571	12.7777777778	1	1.22222222222	0.0222222222222
sheep (uncastrated)	0.927419354839	0.0725806451613	0.982142857143	0.0178571428571	12.7777777778	1	1.22222222222	0.0222222222222
aigrette (of a rooster)	0.927419354839	0.0725806451613	0.982142857143	0.0178571428571	12.7777777778	1	1.22222222222	0.0222222222222
cattle	0.927640352142	0.0723596478582	0.7112245151	0.2887754849	384.595715817	30	133.404284183	54.1655778658
wheat flour	0.927710843373	0.0722891566265	0.965517241379	0.0344827586207	12.8333333333	1	1.16666666667	0.0416666666667
pelt	0.927826949983	0.0721730500174	0.990407422584	0.00959257741617	205.689397859	16	29.3106021412	0.283887432326
sowing field	0.927835051546	0.0721649484536	0.741573033708	0.258426966292	12.8571428571	1	3.14285714286	1.09523809524
beam	0.927841784777	0.0721582152229	0.984874408605	0.0151255913949	231.451846119	18	32.548153881	0.499870919541
meat	0.927887443271	0.072112556729	0.553083181691	0.446916818309	167.273735805	13	85.7262641947	69.2707905569
saddle	0.927911275416	0.0720887245841	0.951923076923	0.0480769230769	25.7435897436	2	2.25641025641	0.11396011396
to guard	0.927927927928	0.0720720720721	0.996291718171	0.00370828182942	25.75	2	3.25	0.0120967741935
to line with fur	0.927927927928	0.0720720720721	0.996291718171	0.00370828182942	25.75	2	3.25	0.0120967741935
deed	0.927927927928	0.0720720720721	0.999158957107	0.000841042893188	25.75	2	8.25	0.00694444444444
act	0.927927927928	0.0720720720721	0.999158957107	0.000841042893188	25.75	2	8.25	0.00694444444444
hatchet	0.927942183196	0.0720578168045	0.976054835583	0.0239451644167	167.410683761	13	21.5893162393	0.529642094017
ox	0.927979559043	0.0720204409567	0.514626152731	0.485373847269	631.36239919	49	75.6376008102	71.338219227
the world	0.92799503414	0.0720049658597	0.998532433226	0.00146756677429	51.5517241379	4	7.44827586207	0.0109469074986
fruit (of tree	0.928104575163	0.0718954248366	0.989010989011	0.010989010989	12.9090909091	1	1.09090909091	0.0121212121212
beard	0.928455284553	0.0715447154472	0.966702296941	0.0332977030589	51.9090909091	4	3.09090909091	0.106465220386
corn)	0.928571428571	0.0714285714286	0.995555555556	0.00444444444444	13.0	1	2.0	0.00892857142857
to reap (berries	0.928571428571	0.0714285714286	0.995555555556	0.00444444444444	13.0	1	2.0	0.00892857142857
to pull tight	0.928571428571	0.0714285714286	0.995555555556	0.00444444444444	13.0	1	2.0	0.00892857142857
draw	0.928571428571	0.0714285714286	0.995555555556	0.00444444444444	13.0	1	2.0	0.00892857142857
to tear (off)	0.928571428571	0.0714285714286	0.995555555556	0.00444444444444	13.0	1	2.0	0.00892857142857
immobile	0.928571428571	0.0714285714286	0.99609375	0.00390625	13.0	1	3.0	0.0117647058824
swollen	0.928571428571	0.0714285714286	0.99609375	0.00390625	13.0	1	3.0	0.0117647058824
clumsy	0.928571428571	0.0714285714286	0.99609375	0.00390625	13.0	1	3.0	0.0117647058824
oil, esp. for alimentary uses	0.928571428571	0.0714285714286	0.99609375	0.00390625	13.0	1	3.0	0.0117647058824
heavy	0.928571428571	0.0714285714286	0.99609375	0.00390625	13.0	1	3.0	0.0117647058824
swollen with the cold	0.928571428571	0.0714285714286	0.99609375	0.00390625	13.0	1	3.0	0.0117647058824
obesity	0.928571428571	0.0714285714286	0.99609375	0.00390625	13.0	1	3.0	0.0117647058824
rower	0.928853754941	0.0711462450593	0.996291718171	0.00370828182942	26.1111111111	2	2.88888888889	0.010752688172
firewood	0.92893740254	0.0710625974605	0.98740448169	0.0125955183097	143.793103448	11	18.2068965517	0.232250615764
(wooden) plow	0.929078014184	0.0709219858156	0.996176952485	0.00382304751502	39.3	3	5.7	0.021875
mown crops	0.929347826087	0.070652173913	0.982142857143	0.0178571428571	13.1538461538	1	0.846153846154	0.0153846153846
canary	0.929347826087	0.070652173913	0.982142857143	0.0178571428571	13.1538461538	1	0.846153846154	0.0153846153846
nightingale	0.929347826087	0.070652173913	0.982142857143	0.0178571428571	13.1538461538	1	0.846153846154	0.0153846153846
to thresh	0.929411764706	0.0705882352941	0.977777777778	0.0222222222222	13.1666666667	1	1.83333333333	0.0416666666667
wear down	0.929411764706	0.0705882352941	0.977777777778	0.0222222222222	13.1666666667	1	1.83333333333	0.0416666666667
exhaust	0.929411764706	0.0705882352941	0.977777777778	0.0222222222222	13.1666666667	1	1.83333333333	0.0416666666667
sacramental bread	0.929411764706	0.0705882352941	0.977777777778	0.0222222222222	13.1666666667	1	1.83333333333	0.0416666666667
grind	0.929411764706	0.0705882352941	0.977777777778	0.0222222222222	13.1666666667	1	1.83333333333	0.0416666666667
wear off	0.929411764706	0.0705882352941	0.977777777778	0.0222222222222	13.1666666667	1	1.83333333333	0.0416666666667
material	0.929411764706	0.0705882352941	0.986999676258	0.0130003237423	65.8333333333	5	14.1666666667	0.186597075405
handle	0.929500457056	0.0704995429444	0.981080639561	0.0189193604388	158.213869464	12	24.7861305361	0.477980829084
covering	0.93006993007	0.0699300699301	0.9375	0.0625	13.3	1	0.7	0.0466666666667
intertwine	0.93006993007	0.0699300699301	0.9375	0.0625	13.3	1	0.7	0.0466666666667
braid	0.93006993007	0.0699300699301	0.9375	0.0625	13.3	1	0.7	0.0466666666667
wick	0.93006993007	0.0699300699301	0.9375	0.0625	13.3	1	0.7	0.0466666666667
(of a dog) to hunt by scent, with the nose to the ground	0.93023255814	0.0697674418605	0.952380952381	0.047619047619	13.3333333333	1	0.666666666667	0.0333333333333
(y.) dog	0.93023255814	0.0697674418605	0.952380952381	0.047619047619	13.3333333333	1	0.666666666667	0.0333333333333
l. farm dog	0.93023255814	0.0697674418605	0.952380952381	0.047619047619	13.3333333333	1	0.666666666667	0.0333333333333
pup	0.93023255814	0.0697674418605	0.952380952381	0.047619047619	13.3333333333	1	0.666666666667	0.0333333333333
tracker dog	0.93023255814	0.0697674418605	0.952380952381	0.047619047619	13.3333333333	1	0.666666666667	0.0333333333333
little axe	0.930434782609	0.0695652173913	0.990476190476	0.00952380952381	13.375	1	1.625	0.015625
clay	0.930555555556	0.0694444444444	0.986607142857	0.0133928571429	13.4	1	2.6	0.0352941176471
copper alloy	0.930555555556	0.0694444444444	0.986607142857	0.0133928571429	13.4	1	2.6	0.0352941176471
brass ore	0.930555555556	0.0694444444444	0.986607142857	0.0133928571429	13.4	1	2.6	0.0352941176471
semen	0.931011826544	0.068988173456	0.987159956474	0.0128400435256	94.4666666667	7	6.53333333333	0.0849794238683
barley (plant and grain)	0.931034482759	0.0689655172414	0.710306406685	0.289693593315	13.5	1	2.5	1.01960784314
offspring	0.931034482759	0.0689655172414	0.99609375	0.00390625	13.5	1	2.5	0.00980392156863
parturition	0.931034482759	0.0689655172414	0.99609375	0.00390625	13.5	1	2.5	0.00980392156863
young of a w. animal	0.931034482759	0.0689655172414	0.99609375	0.00390625	13.5	1	2.5	0.00980392156863
a f. animal which has just given birth	0.931034482759	0.0689655172414	0.99609375	0.00390625	13.5	1	2.5	0.00980392156863
y. of the deer	0.931034482759	0.0689655172414	0.99609375	0.00390625	13.5	1	2.5	0.00980392156863
breeding	0.931034482759	0.0689655172414	0.99609375	0.00390625	13.5	1	2.5	0.00980392156863
page	0.931034482759	0.0689655172414	0.998379254457	0.00162074554295	54.0	4	8.0	0.012987012987
balk	0.931043072603	0.0689569273971	0.995399388854	0.00460061114627	67.5090311987	5	6.49096880131	0.0300004437935
straw	0.931297709924	0.0687022900763	0.990476190476	0.00952380952381	13.5555555556	1	1.44444444444	0.0138888888889
fodder (grain)	0.931297709924	0.0687022900763	0.990476190476	0.00952380952381	13.5555555556	1	1.44444444444	0.0138888888889
(solid) fodder	0.931297709924	0.0687022900763	0.990476190476	0.00952380952381	13.5555555556	1	1.44444444444	0.0138888888889
bird-feed	0.931297709924	0.0687022900763	0.990476190476	0.00952380952381	13.5555555556	1	1.44444444444	0.0138888888889
goiter	0.931297709924	0.0687022900763	0.990476190476	0.00952380952381	13.5555555556	1	1.44444444444	0.0138888888889
beak	0.931297709924	0.0687022900763	0.990476190476	0.00952380952381	13.5555555556	1	1.44444444444	0.0138888888889
of goat	0.931596091205	0.0684039087948	0.923076923077	0.0769230769231	27.2380952381	2	0.761904761905	0.0634920634921
to mow	0.931635617843	0.0683643821569	0.973256132364	0.0267438676365	136.275	10	15.725	0.432103435673
to churn up	0.931677018634	0.0683229813665	0.967741935484	0.0322580645161	13.6363636364	1	1.36363636364	0.0454545454545
to dig out	0.931677018634	0.0683229813665	0.967741935484	0.0322580645161	13.6363636364	1	1.36363636364	0.0454545454545
panicle	0.931677018634	0.0683229813665	0.989010989011	0.010989010989	40.9090909091	3	4.09090909091	0.0454545454545
peel	0.931737678945	0.0682623210547	0.983347419763	0.0166525802375	109.194960212	8	15.8050397878	0.267651786066
nutrition	0.931818181818	0.0681818181818	0.991666666667	0.00833333333333	13.6666666667	1	2.33333333333	0.0196078431373
bait	0.931818181818	0.0681818181818	0.991666666667	0.00833333333333	13.6666666667	1	2.33333333333	0.0196078431373
dry foodstuff	0.931818181818	0.0681818181818	0.991666666667	0.00833333333333	13.6666666667	1	2.33333333333	0.0196078431373
to use	0.931822154886	0.0681778451139	0.992790922172	0.00720907782817	136.675213675	10	15.3247863248	0.111279802069
wheat	0.931869301723	0.0681306982771	0.464083276816	0.535916723184	355.619455803	26	70.3805441967	81.2744447088
to seize	0.931937172775	0.0680628272251	0.998043052838	0.00195694716243	27.3846153846	2	4.61538461538	0.00904977375566
gagate	0.932038834951	0.0679611650485	0.857142857143	0.142857142857	13.7142857143	1	0.285714285714	0.047619047619
limb	0.932270916335	0.0677290836653	0.986784140969	0.0132158590308	27.5294117647	2	2.47058823529	0.0330882352941
fem. roe deer	0.932281085586	0.0677189144137	0.968890289452	0.0311097105485	137.669230769	10	12.3307692308	0.395923734385
mealtime	0.932352941176	0.0676470588235	0.997772828508	0.0022271714922	27.5652173913	2	2.4347826087	0.0054347826087
puppy	0.932436436911	0.067563563089	0.915466467421	0.0845335325793	82.8052631579	6	5.19473684211	0.479678362573
gladiolus	0.932584269663	0.0674157303371	0.714285714286	0.285714285714	13.8333333333	1	0.166666666667	0.0666666666667
massacre	0.932584269663	0.0674157303371	0.714285714286	0.285714285714	13.8333333333	1	0.166666666667	0.0666666666667
mutilated	0.9326171875	0.0673828125	0.813559322034	0.186440677966	41.5217391304	3	1.47826086957	0.338768115942
arrow (obsolete?)	0.932692307692	0.0673076923077	0.118577075099	0.881422924901	13.8571428571	1	0.142857142857	1.0619047619
stone wall	0.9327176781	0.0672823218997	0.928841126924	0.0711588730758	41.5882352941	3	2.41176470588	0.184766214178
cover	0.93272465161	0.0672753483902	0.942255944241	0.057744055759	27.7285714286	2	1.27142857143	0.0779166666667
crawl	0.932835820896	0.0671641791045	0.949860724234	0.050139275766	27.7777777778	2	1.22222222222	0.0645161290323
to creep	0.932835820896	0.0671641791045	0.949860724234	0.050139275766	27.7777777778	2	1.22222222222	0.0645161290323
to crawl	0.932835820896	0.0671641791045	0.949860724234	0.050139275766	27.7777777778	2	1.22222222222	0.0645161290323
powerful	0.932993835433	0.0670061645671	0.996344011807	0.00365598819285	69.62	5	12.38	0.0454272151899
thunderbolt	0.933014354067	0.066985645933	0.535714285714	0.464285714286	13.9285714286	1	0.0714285714286	0.0619047619048
m. bird	0.933044387984	0.0669556120161	0.962893123579	0.0371068764212	111.482142857	8	8.51785714286	0.328251458686
fertile	0.933277731443	0.0667222685571	0.976867968447	0.0231320315531	55.95	4	8.05	0.190622335891
scion	0.933333333333	0.0666666666667	0.991666666667	0.00833333333333	14.0	1	2.0	0.0168067226891
s. branch growing from a graft	0.933333333333	0.0666666666667	0.991666666667	0.00833333333333	14.0	1	2.0	0.0168067226891
leather	0.93347224496	0.0665277550403	0.628154177522	0.371845822478	182.407164906	13	118.592835094	70.2029085908
fur	0.933477989484	0.066522010516	0.645460163428	0.354539836572	252.587131393	18	65.4128686071	35.9301302539
(toponym)	0.933628318584	0.0663716814159	0.995555555556	0.00444444444444	14.0666666667	1	0.933333333333	0.00416666666667
cloak of goat?s hair	0.933673469388	0.0663265306122	0.984615384615	0.0153846153846	14.0769230769	1	0.923076923077	0.0144230769231
woman?s dress	0.933673469388	0.0663265306122	0.984615384615	0.0153846153846	14.0769230769	1	0.923076923077	0.0144230769231
loose flowing garment	0.933673469388	0.0663265306122	0.984615384615	0.0153846153846	14.0769230769	1	0.923076923077	0.0144230769231
woollen fur cloak	0.933673469388	0.0663265306122	0.984615384615	0.0153846153846	14.0769230769	1	0.923076923077	0.0144230769231
coat	0.933673469388	0.0663265306122	0.984615384615	0.0153846153846	14.0769230769	1	0.923076923077	0.0144230769231
white (color)	0.933841882098	0.0661581179018	0.958602452522	0.0413975474778	112.922424242	8	7.07757575758	0.305647328234
type of wheat	0.933910306845	0.066089693155	0.958486194246	0.041513805754	28.2619047619	2	1.7380952381	0.0752801120448
white	0.934099125898	0.0659008741019	0.954985210488	0.0450147895116	113.394444444	8	5.60555555556	0.264227027453
feather (?)	0.934210526316	0.0657894736842	0.948148148148	0.0518518518519	14.2	1	0.8	0.04375
feather	0.934210526316	0.0657894736842	0.948148148148	0.0518518518519	14.2	1	0.8	0.04375
vessel	0.934224950669	0.0657750493313	0.980355096214	0.0196449037862	71.0166666667	5	3.98333333333	0.0798202614379
farrow	0.934350603265	0.0656493967353	0.995708154506	0.00429184549356	71.1621621622	5	7.83783783784	0.0337837837838
money	0.934626464479	0.0653735355206	0.993752749022	0.00624725097777	357.417744442	25	35.5822555581	0.223688720404
goat (pl.)	0.934673366834	0.0653266331658	0.401114206128	0.598885793872	14.3076923077	1	0.692307692308	1.03365384615
s. wheel	0.934863523573	0.0651364764268	0.990936555891	0.00906344410876	71.7619047619	5	5.2380952381	0.0479094076655
kid	0.934915772187	0.0650842278131	0.544611235909	0.455388764091	229.83528971	16	32.1647102897	26.8952359048
yellow	0.934943472224	0.0650565277757	0.968551139252	0.0314488607485	114.969981238	8	4.03001876173	0.130854731067
individual hair	0.935054121565	0.0649458784346	0.97904094478	0.0209590552203	28.7948717949	2	4.20512820513	0.090022296544
scythe	0.935067918263	0.064932081737	0.618299497733	0.381700502267	216.010612916	15	101.989387084	62.9620441524
thin silk web	0.935185185185	0.0648148148148	0.948148148148	0.0518518518519	14.4285714286	1	0.571428571429	0.03125
soft wool	0.935185185185	0.0648148148148	0.948148148148	0.0518518518519	14.4285714286	1	0.571428571429	0.03125
autumn wool	0.935185185185	0.0648148148148	0.948148148148	0.0518518518519	14.4285714286	1	0.571428571429	0.03125
perverse	0.935185185185	0.0648148148148	0.973958333333	0.0260416666667	14.4285714286	1	1.57142857143	0.0420168067227
mountaintop	0.935205183585	0.0647948164147	0.998160073597	0.00183992640294	28.8666666667	2	4.13333333333	0.00761904761905
massive stone	0.935205183585	0.0647948164147	0.998160073597	0.00183992640294	28.8666666667	2	4.13333333333	0.00761904761905
hollow	0.935205183585	0.0647948164147	0.998160073597	0.00183992640294	28.8666666667	2	4.13333333333	0.00761904761905
(slayed) skin	0.935251798561	0.0647482014388	0.991666666667	0.00833333333333	14.4444444444	1	1.55555555556	0.0130718954248
gooseberry	0.935275080906	0.0647249190939	0.985775248933	0.0142247510669	28.9	2	2.1	0.030303030303
berry esp. grape	0.935275080906	0.0647249190939	0.985775248933	0.0142247510669	28.9	2	2.1	0.030303030303
livestock	0.935363552812	0.0646364471885	0.997445575546	0.00255442445395	289.422947423	20	45.5770525771	0.116721293368
grit	0.935384615385	0.0646153846154	0.998361998362	0.001638001638	43.4285714286	3	6.57142857143	0.010781671159
to shed	0.935483870968	0.0645161290323	0.985185185185	0.0148148148148	14.5	1	3.5	0.0526315789474
shells	0.935483870968	0.0645161290323	0.985185185185	0.0148148148148	14.5	1	3.5	0.0526315789474
shed	0.935483870968	0.0645161290323	0.985185185185	0.0148148148148	14.5	1	3.5	0.0526315789474
battering ram	0.935599284436	0.0644007155635	0.965165532875	0.0348344671251	87.1666666667	6	4.83333333333	0.174443227995
land compensation	0.935742971888	0.0642570281124	0.933333333333	0.0666666666667	14.5625	1	0.4375	0.03125
knife	0.935858930355	0.0641410696446	0.50022180978	0.49977819022	393.947142753	27	90.0528572471	89.972994258
chop	0.935960591133	0.064039408867	0.997319034853	0.00268096514745	29.2307692308	2	4.76923076923	0.0128205128205
poultry	0.935985368084	0.0640146319159	0.965180432384	0.0348195676162	102.35	7	5.65	0.203827751196
peninsula	0.936061658706	0.063938341294	0.916625515184	0.0833744848164	73.2003395586	5	3.79966044143	0.345609768148
trident	0.936170212766	0.063829787234	0.980769230769	0.0192307692308	14.6666666667	1	1.33333333333	0.0261437908497
bandage	0.936170212766	0.063829787234	0.993705035971	0.00629496402878	73.3333333333	5	6.66666666667	0.0422322775264
barley grown mainly in northern England and Scotland	0.936274509804	0.0637254901961	0.853333333333	0.146666666667	14.6923076923	1	0.307692307692	0.0528846153846
spinning	0.936459412015	0.0635405879852	0.962606311942	0.0373936880579	73.6898604269	5	4.31013957307	0.167432950192
spring (obsolete except in compounds)	0.93661971831	0.0633802816901	0.168421052632	0.831578947368	14.7777777778	1	0.222222222222	1.09722222222
grease(?)	0.936936936937	0.0630630630631	0.53228962818	0.46771037182	14.8571428571	1	1.14285714286	1.00420168067
the period extending from Ash-Wednesday to Holy Thursday (Christianity)	0.937062937063	0.0629370629371	0.533333333333	0.466666666667	14.8888888889	1	0.111111111111	0.0972222222222
a year	0.937062937063	0.0629370629371	0.533333333333	0.466666666667	14.8888888889	1	0.111111111111	0.0972222222222
fem. cat	0.937125748503	0.062874251497	0.824034334764	0.175965665236	44.7142857143	3	0.285714285714	0.0610119047619
of barley	0.937125748503	0.062874251497	0.988621997472	0.0113780025284	29.8095238095	2	2.19047619048	0.0252100840336
origin	0.937399678973	0.0626003210273	0.985401459854	0.014598540146	44.9230769231	3	2.07692307692	0.0307692307692
relationship	0.937399678973	0.0626003210273	0.985401459854	0.014598540146	44.9230769231	3	2.07692307692	0.0307692307692
ram (m. sheep)	0.9375	0.0625	0.493946731235	0.506053268765	15.0	1	1.0	1.02450980392
monstrous beast or fish	0.9375	0.0625	0.95625	0.04375	15.0	1	1.0	0.0457516339869
various w. or fabulous animals	0.9375	0.0625	0.95625	0.04375	15.0	1	1.0	0.0457516339869
to strip skin off from meat	0.9375	0.0625	0.965909090909	0.0340909090909	15.0	1	1.0	0.0352941176471
injured skin	0.9375	0.0625	0.965909090909	0.0340909090909	15.0	1	1.0	0.0352941176471
earth	0.937510356723	0.062489643277	0.990571623847	0.00942837615261	255.045079929	17	29.9549200715	0.285114420054
colt	0.937546468401	0.0624535315985	0.955066921606	0.0449330783939	45.0357142857	3	3.96428571429	0.186507936508
to pull	0.937649880096	0.0623501199041	0.976270434021	0.0237295659787	75.1923076923	5	7.80769230769	0.189776462853
horned ram	0.937823834197	0.0621761658031	0.973958333333	0.0260416666667	15.0833333333	1	0.916666666667	0.0245098039216
kid (m. or fem.)	0.937823834197	0.0621761658031	0.973958333333	0.0260416666667	15.0833333333	1	0.916666666667	0.0245098039216
vintage	0.937984496124	0.062015503876	0.979099678457	0.0209003215434	30.25	2	3.75	0.0800492610837
beehive	0.938063346593	0.0619366534065	0.92264813992	0.07735186008	90.8731707317	6	4.12682926829	0.345980126468
centre	0.93820529386	0.0617947061403	0.961862924446	0.0381370755536	91.0956959707	6	5.9043040293	0.234100809101
railway carriage	0.938366718028	0.0616332819723	0.984586641756	0.0154133582438	60.9	4	3.1	0.0485294117647
millstone	0.938566552901	0.061433447099	0.974935859483	0.0250641405171	45.8333333333	3	3.16666666667	0.0814102564103
she-wolf	0.938587512794	0.0614124872057	0.963936430318	0.0360635696822	76.4166666667	5	1.58333333333	0.0592369477912
pin	0.938656280428	0.0613437195716	0.996309192834	0.00369080716581	91.8095238095	6	13.1904761905	0.048863851096
rod	0.938760005218	0.0612399947816	0.984866187793	0.0151338122074	91.9751879699	6	11.0248120301	0.169411273281
piece of cultivated land	0.938775510204	0.0612244897959	0.864661654135	0.135338345865	15.3333333333	1	6.66666666667	1.04347826087
y. bull	0.938836956922	0.0611630430784	0.969906080431	0.0300939195686	199.546651469	13	15.4533485306	0.479481299403
goat	0.939079034454	0.0609209655456	0.454736237566	0.545263762434	339.123626374	22	70.8763736264	84.9862292878
crops	0.939130434783	0.0608695652174	0.944444444444	0.0555555555556	15.4285714286	1	0.571428571429	0.0336134453782
like bearded wheat	0.939130434783	0.0608695652174	0.944444444444	0.0555555555556	15.4285714286	1	0.571428571429	0.0336134453782
to go to seed	0.939130434783	0.0608695652174	0.970588235294	0.0294117647059	15.4285714286	1	1.57142857143	0.047619047619
to fasten	0.939130434783	0.0608695652174	0.970588235294	0.0294117647059	15.4285714286	1	1.57142857143	0.047619047619
to pin	0.939130434783	0.0608695652174	0.970588235294	0.0294117647059	15.4285714286	1	1.57142857143	0.047619047619
to accompany	0.939130434783	0.0608695652174	0.970588235294	0.0294117647059	15.4285714286	1	1.57142857143	0.047619047619
herd of horses	0.939177101968	0.0608228980322	0.985915492958	0.0140845070423	30.8823529412	2	4.11764705882	0.0588235294118
skin (person's)	0.939227830179	0.060772169821	0.99317460421	0.00682539578961	247.278406006	16	24.7215939938	0.169894259119
stony ridge	0.939393939394	0.0606060606061	0.989583333333	0.0104166666667	15.5	1	2.5	0.0263157894737
convent	0.939393939394	0.0606060606061	0.989583333333	0.0104166666667	15.5	1	2.5	0.0263157894737
piece of stone	0.939393939394	0.0606060606061	0.989583333333	0.0104166666667	15.5	1	2.5	0.0263157894737
stony place	0.939393939394	0.0606060606061	0.989583333333	0.0104166666667	15.5	1	2.5	0.0263157894737
stone building	0.939393939394	0.0606060606061	0.989583333333	0.0104166666667	15.5	1	2.5	0.0263157894737
clump	0.939393939394	0.0606060606061	0.993288590604	0.00671140939597	31.0	2	4.0	0.027027027027
stick	0.939416351022	0.0605836489777	0.960574604989	0.0394253950107	279.109868813	18	22.8901311866	0.939492319693
beet	0.939449541284	0.0605504587156	0.962264150943	0.0377358490566	46.5454545455	3	1.45454545455	0.0570409982175
s. mackerel	0.939534883721	0.0604651162791	0.910714285714	0.0892857142857	15.5384615385	1	0.461538461538	0.0452488687783
Germanic throwing-spear	0.939534883721	0.0604651162791	0.910714285714	0.0892857142857	15.5384615385	1	0.461538461538	0.0452488687783
leister	0.939534883721	0.0604651162791	0.910714285714	0.0892857142857	15.5384615385	1	0.461538461538	0.0452488687783
eelspear	0.939534883721	0.0604651162791	0.910714285714	0.0892857142857	15.5384615385	1	0.461538461538	0.0452488687783
headland	0.939534883721	0.0604651162791	0.910714285714	0.0892857142857	15.5384615385	1	0.461538461538	0.0452488687783
s. tip	0.939534883721	0.0604651162791	0.910714285714	0.0892857142857	15.5384615385	1	0.461538461538	0.0452488687783
sign (out of straws or twigs) that marks the boundary of the sowed land	0.93956043956	0.0604395604396	0.885416666667	0.114583333333	15.5454545455	1	0.454545454545	0.0588235294118
wrinkle	0.93956043956	0.0604395604396	0.885416666667	0.114583333333	15.5454545455	1	0.454545454545	0.0588235294118
(dial.) harrow	0.93956043956	0.0604395604396	0.885416666667	0.114583333333	15.5454545455	1	0.454545454545	0.0588235294118
f. animal (dog, fox, wolf, sheep)	0.93956043956	0.0604395604396	0.996539792388	0.00346020761246	15.5454545455	1	1.45454545455	0.00505050505051
fem. animal (dog, fox, sheep)	0.93956043956	0.0604395604396	0.996539792388	0.00346020761246	15.5454545455	1	1.45454545455	0.00505050505051
trunk	0.939698492462	0.0603015075377	0.998536942209	0.00146305779078	31.1666666667	2	5.83333333333	0.00854700854701
to tear out	0.939698492462	0.0603015075377	0.998536942209	0.00146305779078	31.1666666667	2	5.83333333333	0.00854700854701
life	0.939799331104	0.0602006688963	0.961538461538	0.0384615384615	31.2222222222	2	2.77777777778	0.111111111111
stallion	0.939810999795	0.0601890002045	0.949786965589	0.0502130344105	234.214971989	15	11.7850280112	0.623047102661
lover	0.93984962406	0.0601503759398	0.970588235294	0.0294117647059	15.625	1	1.375	0.0416666666667
unction	0.93984962406	0.0601503759398	0.970588235294	0.0294117647059	15.625	1	1.375	0.0416666666667
glue	0.93984962406	0.0601503759398	0.970588235294	0.0294117647059	15.625	1	1.375	0.0416666666667
(y.) sow	0.93987115247	0.0601288475304	0.994042299672	0.00595770032767	62.5238095238	4	4.47619047619	0.0268276324614
to plow	0.939901376618	0.060098623382	0.766527542851	0.233472457149	234.58974359	15	29.4102564103	8.95791011492
the knowledge of a person or a social group	0.94	0.06	0.993181818182	0.00681818181818	15.6666666667	1	6.33333333333	0.0434782608696
observance of religious rites	0.94	0.06	0.993181818182	0.00681818181818	15.6666666667	1	6.33333333333	0.0434782608696
cultivating the earth	0.94	0.06	0.993181818182	0.00681818181818	15.6666666667	1	6.33333333333	0.0434782608696
care bestowed on plants	0.94	0.06	0.993181818182	0.00681818181818	15.6666666667	1	6.33333333333	0.0434782608696
honour	0.94	0.06	0.993181818182	0.00681818181818	15.6666666667	1	6.33333333333	0.0434782608696
care	0.94	0.06	0.993181818182	0.00681818181818	15.6666666667	1	6.33333333333	0.0434782608696
the process of cultivating the land	0.94	0.06	0.993181818182	0.00681818181818	15.6666666667	1	6.33333333333	0.0434782608696
to live in	0.94	0.06	0.993181818182	0.00681818181818	15.6666666667	1	6.33333333333	0.0434782608696
the techniques and methods	0.94	0.06	0.993181818182	0.00681818181818	15.6666666667	1	6.33333333333	0.0434782608696
training of the body	0.94	0.06	0.993181818182	0.00681818181818	15.6666666667	1	6.33333333333	0.0434782608696
mode of growing plants	0.94	0.06	0.993181818182	0.00681818181818	15.6666666667	1	6.33333333333	0.0434782608696
labor	0.94	0.06	0.993181818182	0.00681818181818	15.6666666667	1	6.33333333333	0.0434782608696
inhabit	0.94	0.06	0.993181818182	0.00681818181818	15.6666666667	1	6.33333333333	0.0434782608696
to take care of	0.94	0.06	0.993181818182	0.00681818181818	15.6666666667	1	6.33333333333	0.0434782608696
training or improvement of the faculties	0.94	0.06	0.993181818182	0.00681818181818	15.6666666667	1	6.33333333333	0.0434782608696
veneration of a person	0.94	0.06	0.993181818182	0.00681818181818	15.6666666667	1	6.33333333333	0.0434782608696
bloody	0.94	0.06	0.999273255814	0.000726744186047	47.0	3	5.0	0.00363636363636
gore	0.94	0.06	0.999273255814	0.000726744186047	47.0	3	5.0	0.00363636363636
perfume	0.940054495913	0.0599455040872	0.998969072165	0.00103092783505	47.0454545455	3	6.95454545455	0.00717703349282
paddle	0.940138142748	0.0598618572525	0.983430474604	0.0165695253955	47.1153846154	3	4.88461538462	0.0822994210091
beast of burden	0.940159863335	0.0598401366648	0.994433841153	0.00556615884674	282.801452056	18	26.1985479443	0.146641509346
to weave	0.940183278526	0.0598167214744	0.495658928939	0.504341071061	267.201467098	17	63.7985329021	64.9160512147
to bury	0.940217391304	0.0597826086957	0.988235294118	0.0117647058824	15.7272727273	1	1.27272727273	0.0151515151515
to scrape	0.940217391304	0.0597826086957	0.988235294118	0.0117647058824	15.7272727273	1	1.27272727273	0.0151515151515
shell	0.940459190724	0.0595408092759	0.982766979531	0.0172330204694	126.361626879	8	14.6383731211	0.256686873785
pavement	0.940476190476	0.0595238095238	0.990712074303	0.00928792569659	15.8	1	3.2	0.03
bump	0.940476190476	0.0595238095238	0.990712074303	0.00928792569659	15.8	1	3.2	0.03
tire out	0.940503432494	0.0594965675057	0.997319034853	0.00268096514745	31.6153846154	2	2.38461538462	0.00641025641026
disable	0.940503432494	0.0594965675057	0.997319034853	0.00268096514745	31.6153846154	2	2.38461538462	0.00641025641026
smite	0.940503432494	0.0594965675057	0.997319034853	0.00268096514745	31.6153846154	2	2.38461538462	0.00641025641026
reddish horse	0.940625	0.059375	0.985074626866	0.0149253731343	31.6842105263	2	2.31578947368	0.0350877192982
fem. of the fox	0.940625	0.059375	0.985074626866	0.0149253731343	31.6842105263	2	2.31578947368	0.0350877192982
honey drink	0.940677966102	0.0593220338983	0.996539792388	0.00346020761246	15.8571428571	1	1.14285714286	0.00396825396825
drinking bout	0.940677966102	0.0593220338983	0.996539792388	0.00346020761246	15.8571428571	1	1.14285714286	0.00396825396825
axle	0.940777115473	0.0592228845272	0.557748800434	0.442251199566	111.197552448	7	63.8024475524	50.5903534769
cock	0.940782809945	0.0592171900552	0.461662237066	0.538337762934	206.530848861	13	46.4691511387	54.1870156597
located in the middle	0.940928270042	0.0590717299578	0.998364677024	0.00163532297629	31.8571428571	2	3.14285714286	0.00514800514801
woods (forest)	0.940928270042	0.0590717299578	0.998364677024	0.00163532297629	31.8571428571	2	3.14285714286	0.00514800514801
sword (poetic)	0.94094488189	0.0590551181102	0.0590277777778	0.940972222222	15.9333333333	1	0.0666666666667	1.06274509804
barley	0.941005545511	0.0589944544892	0.343741020796	0.656258979204	255.211932351	16	42.7880676492	81.689562487
to pour	0.941163159086	0.0588368409142	0.978712357217	0.021287642783	31.9923076923	2	2.00769230769	0.0436686390533
uvula	0.941176470588	0.0588235294118	0.493150684932	0.506849315068	16.0	1	1.0	1.02777777778
spade (?)	0.941176470588	0.0588235294118	0.773195876289	0.226804123711	16.0	1	7.0	2.05333333333
cornfield	0.941176470588	0.0588235294118	0.984212578588	0.0157874214125	80.0	5	6.0	0.0962439726293
pumpkin	0.941176470588	0.0588235294118	0.996539792388	0.00346020761246	16.0	1	1.0	0.00347222222222
fasting food	0.941176470588	0.0588235294118	0.996539792388	0.00346020761246	16.0	1	1.0	0.00347222222222
to break	0.941343489127	0.0586565108727	0.992911325945	0.00708867405543	80.2420289855	5	11.7579710145	0.083943471987
seagull	0.941463414634	0.0585365853659	0.970588235294	0.0294117647059	16.0833333333	1	0.916666666667	0.0277777777778
battle axe	0.9415006022	0.0584993978003	0.785963408858	0.214036591142	273.601282051	17	26.3987179487	7.1890008321
s. piece	0.941666666667	0.0583333333333	0.975903614458	0.0240963855422	32.2857142857	2	1.71428571429	0.042328042328
morsel	0.941666666667	0.0583333333333	0.975903614458	0.0240963855422	32.2857142857	2	1.71428571429	0.042328042328
courier	0.941704035874	0.0582959641256	0.970588235294	0.0294117647059	16.1538461538	1	0.846153846154	0.025641025641
meal	0.941884355738	0.0581156442618	0.980467253926	0.0195327460743	64.8282828283	4	5.17171717172	0.10303030303
silver money	0.941912061315	0.058087938685	0.983049896167	0.0169501038334	64.8611111111	4	3.13888888889	0.0541218637993
fem. of an animal	0.942028985507	0.0579710144928	0.985185185185	0.0148148148148	16.25	1	1.75	0.0263157894737
with y. (of cows or mares)	0.942028985507	0.0579710144928	0.985185185185	0.0148148148148	16.25	1	1.75	0.0263157894737
rye	0.942041399001	0.0579586009993	0.191934811037	0.808065188963	195.044334975	12	14.9556650246	62.9648796844
bind	0.942141432055	0.057858567945	0.992568029195	0.00743197080535	48.8505747126	3	4.14942528736	0.0310693138279
to win	0.942184154176	0.0578158458244	0.999486565121	0.000513434879343	65.1851851852	4	10.8148148148	0.00555555555556
hare (possibly also rabbit)	0.942196531792	0.0578034682081	0.397476340694	0.602523659306	16.3	1	0.7	1.06111111111
fabric	0.942225998301	0.0577740016992	0.831894110985	0.168105889015	48.9264705882	3	1.07352941176	0.216934599927
line traced in the earth	0.942350332594	0.0576496674058	0.991825613079	0.00817438692098	32.6923076923	2	4.30769230769	0.0355029585799
to anoint	0.942503145872	0.0574968541284	0.998270097872	0.00172990212764	98.3535353535	6	12.6464646465	0.0219150570028
domestic rabbit	0.942528735632	0.0574712643678	0.90756302521	0.0924369747899	16.4	1	0.6	0.0611111111111
fem. donkey	0.942684063374	0.0573159366263	0.920849420849	0.0791505791506	49.3414634146	3	0.658536585366	0.0566037735849
twig	0.942697877483	0.0573021225174	0.988326730016	0.0116732699842	115.15952381	7	15.8404761905	0.187094155844
spear for to hunt w. boar	0.942708333333	0.0572916666667	0.90756302521	0.0924369747899	16.4545454545	1	0.545454545455	0.0555555555556
ray (of light)	0.942708333333	0.0572916666667	0.90756302521	0.0924369747899	16.4545454545	1	0.545454545455	0.0555555555556
to sting (of an insect)	0.942708333333	0.0572916666667	0.90756302521	0.0924369747899	16.4545454545	1	0.545454545455	0.0555555555556
ray (of sun)	0.942708333333	0.0572916666667	0.90756302521	0.0924369747899	16.4545454545	1	0.545454545455	0.0555555555556
grain (singulative)	0.942883046238	0.0571169537625	0.945665069046	0.0543349309543	49.5238095238	3	4.47619047619	0.257187780773
battle-axe	0.943024105186	0.0569758948137	0.950966591246	0.0490334087542	66.2051282051	4	4.79487179487	0.247231512449
reef	0.943060498221	0.0569395017794	0.995061728395	0.00493827160494	33.125	2	3.875	0.0192307692308
horse (pej.)	0.943098113914	0.0569018860861	0.988490718471	0.0115092815289	132.592879257	8	8.40712074303	0.0978865230303
rock (gen.)	0.943127962085	0.0568720379147	0.882352941176	0.117647058824	16.5833333333	1	0.416666666667	0.0555555555556
stone (material)	0.943127962085	0.0568720379147	0.882352941176	0.117647058824	16.5833333333	1	0.416666666667	0.0555555555556
stone (fragment)	0.943127962085	0.0568720379147	0.882352941176	0.117647058824	16.5833333333	1	0.416666666667	0.0555555555556
meat of fowl	0.943181818182	0.0568181818182	0.90756302521	0.0924369747899	16.6	1	0.4	0.0407407407407
meat of the young of the hen	0.943181818182	0.0568181818182	0.90756302521	0.0924369747899	16.6	1	0.4	0.0407407407407
domestic fowl prepared as food	0.943181818182	0.0568181818182	0.90756302521	0.0924369747899	16.6	1	0.4	0.0407407407407
gosling	0.943181818182	0.0568181818182	0.90756302521	0.0924369747899	16.6	1	0.4	0.0407407407407
young of the hen	0.943181818182	0.0568181818182	0.90756302521	0.0924369747899	16.6	1	0.4	0.0407407407407
domestic fowl	0.943181818182	0.0568181818182	0.90756302521	0.0924369747899	16.6	1	0.4	0.0407407407407
room	0.943217665615	0.0567823343849	0.972223765346	0.0277762346536	49.8333333333	3	6.16666666667	0.176180408739
skin (animal or human)	0.943220753793	0.0567792462066	0.998990918264	0.00100908173562	66.4482758621	4	4.55172413793	0.00459770114943
m. goat (?)	0.943231441048	0.056768558952	0.972972972973	0.027027027027	16.6153846154	1	1.38461538462	0.0384615384615
a kind of deer	0.943231441048	0.056768558952	0.972972972973	0.027027027027	16.6153846154	1	1.38461538462	0.0384615384615
sheep	0.943348253261	0.0566517467386	0.578185853782	0.421814146218	482.899485356	29	92.1005146441	67.1917164639
branch	0.943393683454	0.0566063165461	0.982553108591	0.0174468914088	149.992857143	9	14.0071428571	0.24872049993
m. deer	0.943446859533	0.0565531404666	0.992121883859	0.00787811614138	166.824839744	10	11.1751602564	0.0887383010403
middle	0.943484857732	0.0565151422676	0.996837263947	0.00316273605327	166.943728685	10	14.0562713149	0.0445973256318
sickle	0.943503795334	0.0564962046658	0.567261954699	0.432738045301	534.409729456	32	83.5902705444	63.7671713781
consisting of live animals (of property or wealth)	0.943775100402	0.0562248995984	0.996913580247	0.00308641975309	16.7857142857	1	1.21428571429	0.00375939849624
fast	0.943775100402	0.0562248995984	0.996913580247	0.00308641975309	16.7857142857	1	1.21428571429	0.00375939849624
taking only a short time	0.943775100402	0.0562248995984	0.996913580247	0.00308641975309	16.7857142857	1	1.21428571429	0.00375939849624
(obsolete) alive	0.943775100402	0.0562248995984	0.996913580247	0.00308641975309	16.7857142857	1	1.21428571429	0.00375939849624
owned as livestock (of animals)	0.943775100402	0.0562248995984	0.996913580247	0.00308641975309	16.7857142857	1	1.21428571429	0.00375939849624
soil	0.943810406317	0.0561895936828	0.992381953837	0.00761804616251	285.547124579	17	33.4528754207	0.256801877783
m. duck	0.944061230275	0.055938769725	0.962881286432	0.0371187135685	67.5067567568	4	4.49324324324	0.173212846993
lamb?s wool	0.944126074499	0.0558739255014	0.99593495935	0.00406504065041	50.6923076923	3	11.3076923077	0.0461538461538
blade	0.944146273011	0.0558537269889	0.989560128345	0.0104398716554	169.039081886	10	15.9609181141	0.168387884517
needle	0.944252944256	0.0557470557442	0.949422125131	0.0505778748695	135.505336617	8	6.49466338259	0.345985482316
vine	0.944332055888	0.0556679441121	0.973679939546	0.0263200604545	203.563915489	12	6.43608451132	0.173977224494
dick	0.944341372913	0.0556586270872	0.999358563182	0.000641436818473	33.9333333333	2	5.06666666667	0.00325203252033
y. of an animal	0.944341372913	0.0556586270872	0.999358563182	0.000641436818473	33.9333333333	2	5.06666666667	0.00325203252033
chicken meat	0.944341372913	0.0556586270872	0.999358563182	0.000641436818473	33.9333333333	2	5.06666666667	0.00325203252033
axe	0.944443662643	0.0555563373567	0.449310669296	0.550689330704	424.9936675	25	88.0063324999	107.86333745
(castrated?) m. sheep	0.944444444444	0.0555555555556	0.985185185185	0.0148148148148	17.0	1	1.0	0.015037593985
sheep (?)	0.944444444444	0.0555555555556	0.985185185185	0.0148148148148	17.0	1	1.0	0.015037593985
thorn	0.944444444444	0.0555555555556	0.987491694654	0.0125083053464	85.0	5	10.0	0.126667448589
striped	0.944680851064	0.0553191489362	0.986666666667	0.0133333333333	34.1538461538	2	2.84615384615	0.0384615384615
sew	0.944868492343	0.0551315076566	0.547057715999	0.452942284001	85.6922413793	5	5.30775862069	4.39461548987
fem. sheep	0.944963027884	0.0550369721156	0.994358173502	0.00564182649806	103.017625232	6	7.98237476809	0.0452906957314
cutting implement	0.94512195122	0.0548780487805	0.993865700712	0.00613429928828	51.6666666667	3	9.33333333333	0.0576068376068
cart	0.945192099516	0.0548079004837	0.975677889907	0.0243221100931	206.946536797	12	9.05346320346	0.225688550531
peeled or winnowed grain	0.945454545455	0.0545454545455	0.986842105263	0.0131578947368	17.3333333333	1	1.66666666667	0.0222222222222
peeled grain	0.945454545455	0.0545454545455	0.986842105263	0.0131578947368	17.3333333333	1	1.66666666667	0.0222222222222
tail	0.945514831078	0.0544851689219	0.983676487317	0.0163235126834	69.4144736842	4	7.58552631579	0.125877192982
large scythe	0.945525291829	0.0544747081712	0.95	0.05	17.3571428571	1	0.642857142857	0.0338345864662
to lose	0.945525291829	0.0544747081712	0.95	0.05	17.3571428571	1	0.642857142857	0.0338345864662
to stop	0.945525291829	0.0544747081712	0.95	0.05	17.3571428571	1	0.642857142857	0.0338345864662
to be lost	0.945525291829	0.0544747081712	0.95	0.05	17.3571428571	1	0.642857142857	0.0338345864662
to pay	0.945525291829	0.0544747081712	0.95	0.05	17.3571428571	1	0.642857142857	0.0338345864662
to make amends	0.945525291829	0.0544747081712	0.95	0.05	17.3571428571	1	0.642857142857	0.0338345864662
loss	0.945525291829	0.0544747081712	0.95	0.05	17.3571428571	1	0.642857142857	0.0338345864662
clover	0.945584107104	0.0544158928957	0.976589878978	0.0234101210224	69.5079365079	4	3.49206349206	0.083709273183
animal's young	0.945674044266	0.0543259557344	0.998112020138	0.00188797986155	52.2222222222	3	5.77777777778	0.0109289617486
male (gen.)	0.945701357466	0.0542986425339	0.974358974359	0.025641025641	17.4166666667	1	1.58333333333	0.0416666666667
to sting grass	0.945701357466	0.0542986425339	0.974358974359	0.025641025641	17.4166666667	1	1.58333333333	0.0416666666667
adult m. deer, esp. one with a set of antlers	0.945701357466	0.0542986425339	0.974358974359	0.025641025641	17.4166666667	1	1.58333333333	0.0416666666667
m. red deer, specifically at the fifth year	0.945701357466	0.0542986425339	0.974358974359	0.025641025641	17.4166666667	1	1.58333333333	0.0416666666667
m. (red) deer	0.945701357466	0.0542986425339	0.974358974359	0.025641025641	17.4166666667	1	1.58333333333	0.0416666666667
tom-cat	0.945701357466	0.0542986425339	0.974358974359	0.025641025641	17.4166666667	1	1.58333333333	0.0416666666667
wake of a boat	0.945720250522	0.0542797494781	0.991825613079	0.00817438692098	34.8461538462	2	2.15384615385	0.0177514792899
plow	0.945781190012	0.0542188099885	0.561174644594	0.438825355406	366.31945619	21	113.68054381	88.8955078795
to comb	0.945828908312	0.0541710916884	0.988232618718	0.0117673812822	157.140273705	9	13.8597262952	0.165034710141
fermented drink	0.946059004844	0.0539409951563	0.993417872397	0.00658212760322	87.693877551	5	4.30612244898	0.0285312437211
high mountain, above the treeline	0.94606741573	0.0539325842697	0.997861724875	0.00213827512473	35.0833333333	2	2.91666666667	0.00625
to nourish	0.946254071661	0.0537459283388	0.987970012204	0.0120299877957	35.2121212121	2	3.78787878788	0.0461229946524
standing stone	0.946268656716	0.0537313432836	0.992491545824	0.0075084541755	52.8333333333	3	6.16666666667	0.0466524216524
witch	0.946365561044	0.0536344389555	0.902777777778	0.0972222222222	35.2894736842	2	1.71052631579	0.184210526316
young hen	0.946376340591	0.0536236594085	0.978815994591	0.0211840054092	52.9454545455	3	4.05454545455	0.087750418174
buckle	0.946428571429	0.0535714285714	0.996449322143	0.00355067785668	53.0	3	7.0	0.0249433106576
clasp	0.946428571429	0.0535714285714	0.996449322143	0.00355067785668	53.0	3	7.0	0.0249433106576
spin	0.946527350953	0.0534726490473	0.997868124912	0.00213187508801	53.1034482759	3	4.89655172414	0.0104611384784
leopard, esp. melanistic	0.94693877551	0.0530612244898	0.986842105263	0.0131578947368	17.8461538462	1	1.15384615385	0.0153846153846
kind of leopard	0.94693877551	0.0530612244898	0.986842105263	0.0131578947368	17.8461538462	1	1.15384615385	0.0153846153846
leopard or other l. spotted cat	0.94693877551	0.0530612244898	0.986842105263	0.0131578947368	17.8461538462	1	1.15384615385	0.0153846153846
l. spotted cat	0.94693877551	0.0530612244898	0.986842105263	0.0131578947368	17.8461538462	1	1.15384615385	0.0153846153846
wild or cultivated tare	0.94696969697	0.0530303030303	0.984375	0.015625	17.8571428571	1	2.14285714286	0.0340136054422
corn pest	0.94696969697	0.0530303030303	0.984375	0.015625	17.8571428571	1	2.14285714286	0.0340136054422
buckwheat	0.94696969697	0.0530303030303	0.984375	0.015625	17.8571428571	1	2.14285714286	0.0340136054422
vetch seed	0.94696969697	0.0530303030303	0.984375	0.015625	17.8571428571	1	2.14285714286	0.0340136054422
vetch	0.94696969697	0.0530303030303	0.984375	0.015625	17.8571428571	1	2.14285714286	0.0340136054422
to tie	0.947127937337	0.0528720626632	0.978337928318	0.0216620716818	53.7407407407	3	4.25925925926	0.0943072702332
ash tree	0.947368421053	0.0526315789474	0.0	1.0	18.0	1	0.0	8.34666666667
bushes	0.947368421053	0.0526315789474	0.956937799043	0.0430622009569	18.0	1	1.0	0.045
strength	0.947368421053	0.0526315789474	0.971659919028	0.0283400809717	18.0	1	1.0	0.0291666666667
y. m. bovine, esp. castrated	0.947368421053	0.0526315789474	0.971659919028	0.0283400809717	18.0	1	1.0	0.0291666666667
y. ox or heifer	0.947368421053	0.0526315789474	0.971659919028	0.0283400809717	18.0	1	1.0	0.0291666666667
b. cattle	0.947368421053	0.0526315789474	0.971659919028	0.0283400809717	18.0	1	1.0	0.0291666666667
firmness	0.947368421053	0.0526315789474	0.971659919028	0.0283400809717	18.0	1	1.0	0.0291666666667
yearling cow	0.947368421053	0.0526315789474	0.971659919028	0.0283400809717	18.0	1	1.0	0.0291666666667
m. beef-cattle of any age	0.947368421053	0.0526315789474	0.971659919028	0.0283400809717	18.0	1	1.0	0.0291666666667
sickly outgrowth on tree	0.947368421053	0.0526315789474	0.976744186047	0.0232558139535	18.0	1	3.0	0.0714285714286
thin skin	0.947368421053	0.0526315789474	0.976744186047	0.0232558139535	18.0	1	3.0	0.0714285714286
(dial.) lump	0.947368421053	0.0526315789474	0.976744186047	0.0232558139535	18.0	1	3.0	0.0714285714286
manure	0.947368421053	0.0526315789474	0.976744186047	0.0232558139535	18.0	1	3.0	0.0714285714286
turf	0.947368421053	0.0526315789474	0.976744186047	0.0232558139535	18.0	1	3.0	0.0714285714286
web (of water-fowl)	0.947368421053	0.0526315789474	0.976744186047	0.0232558139535	18.0	1	3.0	0.0714285714286
eyeweb	0.947368421053	0.0526315789474	0.976744186047	0.0232558139535	18.0	1	3.0	0.0714285714286
parchment	0.947368421053	0.0526315789474	0.976744186047	0.0232558139535	18.0	1	3.0	0.0714285714286
having a white back (of cattle)	0.947368421053	0.0526315789474	0.976744186047	0.0232558139535	18.0	1	3.0	0.0714285714286
peritoneum	0.947368421053	0.0526315789474	0.976744186047	0.0232558139535	18.0	1	3.0	0.0714285714286
den	0.947543713572	0.052456286428	0.995910697646	0.00408930235424	54.1904761905	3	5.80952380952	0.0238544474394
snake (esp. foreign)	0.947619047619	0.052380952381	0.956937799043	0.0430622009569	18.0909090909	1	0.909090909091	0.0409090909091
rye flour	0.947630922693	0.0523690773067	0.90985915493	0.0901408450704	36.1904761905	2	1.80952380952	0.179271708683
textile	0.947717419026	0.0522825809742	0.998227343231	0.00177265676933	90.6341463415	5	10.3658536585	0.0184077312471
to pound	0.94772818657	0.0522718134298	0.992316689663	0.0076833103371	36.2615384615	2	4.73846153846	0.0366889632107
m. pig	0.94791025174	0.0520897482601	0.955103139955	0.0448968600447	218.371625912	12	23.6283740884	1.11070706414
to milk	0.947996852441	0.0520031475589	0.97331099471	0.0266890052902	72.9184210526	4	3.08157894737	0.0844994840041
doe	0.948079253563	0.0519207464369	0.991796256778	0.00820374322242	255.641732077	14	16.3582679226	0.13530907047
spike	0.948259766461	0.051740233539	0.98907858877	0.0109214112299	256.58246634	14	21.4175336597	0.236492524745
wool	0.948272966467	0.051727033533	0.385361907681	0.614638092319	183.322510823	10	55.6774891775	88.8035507689
a w. boar	0.948275862069	0.051724137931	0.617647058824	0.382352941176	18.3333333333	1	1.66666666667	1.03174603175
a boar	0.948275862069	0.051724137931	0.617647058824	0.382352941176	18.3333333333	1	1.66666666667	1.03174603175
stretch	0.948310139165	0.051689860835	0.990241202056	0.00975879794385	36.6923076923	2	3.30769230769	0.0325972104818
oats (coll.)	0.948387096774	0.0516129032258	0.229759299781	0.770240700219	18.375	1	0.625	2.09523809524
apple (fruit)	0.948387096774	0.0516129032258	0.608017817372	0.391982182628	18.375	1	1.625	1.04761904762
to braid	0.94839298913	0.0516070108703	0.996240375464	0.00375962453648	110.263273125	6	7.73672687466	0.0291969577889
pole	0.948405115161	0.0515948848388	0.956203048359	0.0437969516411	514.68945628	28	38.3105437198	1.7547371696
s. sea-going vessel	0.948571428571	0.0514285714286	0.98	0.02	18.4444444444	1	1.55555555556	0.031746031746
sailing ship	0.948571428571	0.0514285714286	0.98	0.02	18.4444444444	1	1.55555555556	0.031746031746
chieftain	0.948571428571	0.0514285714286	0.98	0.02	18.4444444444	1	1.55555555556	0.031746031746
especially firewood	0.948571428571	0.0514285714286	0.98	0.02	18.4444444444	1	1.55555555556	0.031746031746
a piece of wood	0.948571428571	0.0514285714286	0.98	0.02	18.4444444444	1	1.55555555556	0.031746031746
a pig	0.948571428571	0.0514285714286	0.98	0.02	18.4444444444	1	1.55555555556	0.031746031746
s. adze	0.948598130841	0.0514018691589	0.991666666667	0.00833333333333	18.4545454545	1	1.54545454545	0.012987012987
trace made by plow	0.948598130841	0.0514018691589	0.991666666667	0.00833333333333	18.4545454545	1	1.54545454545	0.012987012987
wooden tool	0.948598130841	0.0514018691589	0.991666666667	0.00833333333333	18.4545454545	1	1.54545454545	0.012987012987
dress	0.948609169358	0.0513908306417	0.985761694682	0.0142383053179	110.752345216	6	5.24765478424	0.0757969308648
also of other stonefruits	0.948717948718	0.0512820512821	0.969230769231	0.0307692307692	18.5	1	1.5	0.047619047619
apple-like beaker	0.948717948718	0.0512820512821	0.969230769231	0.0307692307692	18.5	1	1.5	0.047619047619
metaph. plur. breasts	0.948717948718	0.0512820512821	0.969230769231	0.0307692307692	18.5	1	1.5	0.047619047619
tonsils	0.948717948718	0.0512820512821	0.969230769231	0.0307692307692	18.5	1	1.5	0.047619047619
(seed-)capsule of a rose	0.948717948718	0.0512820512821	0.969230769231	0.0307692307692	18.5	1	1.5	0.047619047619
cheeks	0.948717948718	0.0512820512821	0.969230769231	0.0307692307692	18.5	1	1.5	0.047619047619
juniper	0.948717948718	0.0512820512821	0.983315954119	0.0166840458811	37.0	2	2.0	0.033934252386
sword	0.948948116197	0.0510518838031	0.381474757066	0.618525242934	520.46164165	28	48.53835835	78.7003578452
spears	0.949044585987	0.0509554140127	0.264317180617	0.735682819383	18.625	1	0.375	1.04375
hare (gen.)	0.949152542373	0.0508474576271	0.240963855422	0.759036144578	18.6666666667	1	0.333333333333	1.05
hare (lit. hare of the field)	0.949152542373	0.0508474576271	0.240963855422	0.759036144578	18.6666666667	1	0.333333333333	1.05
hunting-spear	0.949206349206	0.0507936507937	0.877192982456	0.122807017544	18.6875	1	0.3125	0.04375
a kind of oak	0.949206349206	0.0507936507937	0.877192982456	0.122807017544	18.6875	1	0.3125	0.04375
kind of oak	0.949206349206	0.0507936507937	0.877192982456	0.122807017544	18.6875	1	0.3125	0.04375
fem. hare	0.949324324324	0.0506756756757	0.842105263158	0.157894736842	18.7333333333	1	0.266666666667	0.05
m. hare	0.949324324324	0.0506756756757	0.842105263158	0.157894736842	18.7333333333	1	0.266666666667	0.05
paunch fat	0.949324324324	0.0506756756757	0.9975	0.0025	18.7333333333	1	1.26666666667	0.0031746031746
kidneys	0.949324324324	0.0506756756757	0.9975	0.0025	18.7333333333	1	1.26666666667	0.0031746031746
eagle (dialectal)	0.949554896142	0.0504451038576	0.143884892086	0.856115107914	18.8235294118	1	0.176470588235	1.05
citadel raised upon rock	0.94962962963	0.0503703703704	0.98931799507	0.0106820049302	37.7058823529	2	3.29411764706	0.0355677154583
wyvern (mythical serpent)	0.949685534591	0.0503144654088	0.994736842105	0.00526315789474	18.875	1	1.125	0.00595238095238
evil person	0.949685534591	0.0503144654088	0.994736842105	0.00526315789474	18.875	1	1.125	0.00595238095238
cylindrical object	0.949712643678	0.0502873563218	0.990973270101	0.00902672989869	94.4285714286	5	5.57142857143	0.0507498863809
(of a ewe) to bring forth lambs	0.949838187702	0.0501618122977	0.689655172414	0.310344827586	37.8709677419	2	0.129032258065	0.058064516129
to bring forth lambs	0.949838187702	0.0501618122977	0.689655172414	0.310344827586	37.8709677419	2	0.129032258065	0.058064516129
curve	0.949967511371	0.050032488629	0.976290917364	0.0237090826358	37.974025974	2	3.02597402597	0.0734853381912
shears	0.949978556513	0.0500214434874	0.96223651743	0.0377634825696	189.914262821	10	27.0857371795	1.06299412393
fleece	0.950039027677	0.0499609723229	0.986801767709	0.0131982322911	342.281218781	18	20.7187812188	0.2771086314
a building	0.950113378685	0.0498866213152	0.993501805054	0.00649819494585	38.0909090909	2	2.90909090909	0.0190274841438
lumber	0.950113378685	0.0498866213152	0.993501805054	0.00649819494585	38.0909090909	2	2.90909090909	0.0190274841438
to build	0.950113378685	0.0498866213152	0.993501805054	0.00649819494585	38.0909090909	2	2.90909090909	0.0190274841438
young animal	0.950282485876	0.0497175141243	0.984721393701	0.0152786062989	38.2272727273	2	2.77272727273	0.0430207047854
warrior	0.950352436408	0.0496475635918	0.857805944836	0.142194055164	57.4259259259	3	0.574074074074	0.0951612903226
(coll.) snake	0.950617283951	0.0493827160494	0.626016260163	0.373983739837	19.25	1	1.75	1.04545454545
stag-beetle	0.95064165844	0.0493583415597	0.99504950495	0.0049504950495	96.3	5	6.7	0.0333333333333
insect	0.950670950671	0.049329049329	0.996973285619	0.00302671438122	173.448275862	9	17.5517241379	0.0532853353543
aquatic bird	0.950699533644	0.0493004663558	0.91364902507	0.0863509749304	38.5675675676	2	0.432432432432	0.0408701384311
harvest	0.950814230662	0.0491857693379	0.633409991493	0.366590008507	425.283844416	22	49.7161555843	28.773537114
(venomous) snake	0.950920245399	0.0490797546012	0.972789115646	0.0272108843537	19.375	1	1.625	0.0454545454545
Triticum vulgare	0.950943396226	0.0490566037736	0.616822429907	0.383177570093	19.3846153846	1	1.61538461538	1.0034965035
fem. goat	0.950947603122	0.0490523968785	0.986862205927	0.0131377940727	77.5454545455	4	3.45454545455	0.0459893048128
horsewhip	0.950980392157	0.0490196078431	0.945	0.055	19.4	1	0.6	0.0349206349206
fem. wolf	0.951020408163	0.0489795918367	0.965677719604	0.0343222803956	77.6666666667	4	1.33333333333	0.0473895582329
gorse	0.951127819549	0.0488721804511	0.997732426304	0.00226757369615	19.4615384615	1	1.53846153846	0.0034965034965
(grain of) wheat	0.951127819549	0.0488721804511	0.997732426304	0.00226757369615	19.4615384615	1	1.53846153846	0.0034965034965
grain measure	0.951127819549	0.0488721804511	0.997732426304	0.00226757369615	19.4615384615	1	1.53846153846	0.0034965034965
corn measure	0.951127819549	0.0488721804511	0.997732426304	0.00226757369615	19.4615384615	1	1.53846153846	0.0034965034965
goat kid	0.951145752932	0.0488542470676	0.415835563303	0.584164436697	58.4071484071	3	7.59285159285	10.666413037
young dog	0.95124536301	0.0487546369899	0.919966301601	0.0800336983993	39.0217391304	2	1.97826086957	0.172101449275
cereal	0.951315574855	0.048684425145	0.627160394175	0.372839605825	351.728099827	18	84.2719001733	50.0986706663
sheepskin	0.951324356786	0.0486756432139	0.947048903879	0.0529510961214	97.7207792208	5	2.27922077922	0.127435064935
flat and oblong object	0.951334379906	0.0486656200942	0.957654723127	0.042345276873	39.0967741935	2	0.903225806452	0.0399385560676
grain	0.951383456626	0.048616543374	0.640131598956	0.359868401044	567.504769517	29	70.4952304829	39.6309226359
brome grass	0.951469902007	0.0485300979935	0.972213422637	0.0277865773634	39.2115384615	2	1.78846153846	0.0511155511156
to throw	0.951586874664	0.0484131253362	0.960980807562	0.0390191924384	117.933333333	6	6.06666666667	0.246327951884
flock	0.9516457752	0.0483542247999	0.986369805542	0.0136301944583	314.891459148	16	24.1085408522	0.333144930103
oat (plant)	0.95166163142	0.0483383685801	0.229759299781	0.770240700219	19.6875	1	0.3125	1.04761904762
grey	0.951690821256	0.048309178744	0.831156716418	0.168843283582	39.4	2	0.6	0.121885521886
chamois	0.951694810289	0.0483051897114	0.959826275787	0.0401737242128	118.21025641	6	2.78974358974	0.116765285996
shaft	0.951786397401	0.0482136025987	0.985646020358	0.0143539796423	256.633449883	13	26.3665501166	0.383976514685
thyme	0.951807228916	0.0481927710843	0.84	0.16	19.75	1	0.25	0.047619047619
crop of oats	0.951807228916	0.0481927710843	0.84	0.16	19.75	1	0.25	0.047619047619
rye-grass	0.951807228916	0.0481927710843	0.84	0.16	19.75	1	0.25	0.047619047619
of oats	0.951807228916	0.0481927710843	0.84	0.16	19.75	1	0.25	0.047619047619
(pl.) age	0.951807228916	0.0481927710843	0.952380952381	0.047619047619	19.75	1	1.25	0.0625
(arc.) year	0.951807228916	0.0481927710843	0.952380952381	0.047619047619	19.75	1	1.25	0.0625
(obs.) year	0.951807228916	0.0481927710843	0.952380952381	0.047619047619	19.75	1	1.25	0.0625
south wind	0.951807228916	0.0481927710843	0.952380952381	0.047619047619	19.75	1	1.25	0.0625
South	0.951807228916	0.0481927710843	0.952380952381	0.047619047619	19.75	1	1.25	0.0625
flow	0.95183143138	0.0481685686199	0.996959235281	0.0030407647187	138.322981366	7	13.6770186335	0.0417154425638
whitish	0.952015355086	0.0479846449136	0.95206391478	0.0479360852197	39.68	2	1.32	0.0664615384615
pea	0.952046900837	0.0479530991632	0.956034592985	0.0439654070152	178.68338558	9	7.31661442006	0.336471016124
pitchfork	0.952095808383	0.0479041916168	0.971134417197	0.0288655828027	59.625	3	5.375	0.159764194139
(white) bread	0.952095808383	0.0479041916168	0.992481203008	0.00751879699248	19.875	1	1.125	0.00852272727273
the sowing of seed	0.952127659574	0.0478723404255	0.993181818182	0.00681818181818	19.8888888889	1	2.11111111111	0.0144927536232
become parched	0.952127659574	0.0478723404255	0.993181818182	0.00681818181818	19.8888888889	1	2.11111111111	0.0144927536232
seeding field	0.952127659574	0.0478723404255	0.993181818182	0.00681818181818	19.8888888889	1	2.11111111111	0.0144927536232
coll. field	0.952127659574	0.0478723404255	0.993181818182	0.00681818181818	19.8888888889	1	2.11111111111	0.0144927536232
coarse grain	0.952127659574	0.0478723404255	0.993181818182	0.00681818181818	19.8888888889	1	2.11111111111	0.0144927536232
grain field	0.952127659574	0.0478723404255	0.993181818182	0.00681818181818	19.8888888889	1	2.11111111111	0.0144927536232
seed (coll.)	0.952127659574	0.0478723404255	0.993181818182	0.00681818181818	19.8888888889	1	2.11111111111	0.0144927536232
dried grain (?)	0.952127659574	0.0478723404255	0.993181818182	0.00681818181818	19.8888888889	1	2.11111111111	0.0144927536232
to dry	0.952127659574	0.0478723404255	0.993181818182	0.00681818181818	19.8888888889	1	2.11111111111	0.0144927536232
seeds	0.952127659574	0.0478723404255	0.993181818182	0.00681818181818	19.8888888889	1	2.11111111111	0.0144927536232
abounding in grain	0.952127659574	0.0478723404255	0.993181818182	0.00681818181818	19.8888888889	1	2.11111111111	0.0144927536232
sheep (gen.)	0.952143377872	0.0478566221277	0.587115061021	0.412884938979	179.061747776	9	24.938252224	17.5376675397
ocelot (modern)	0.952173913043	0.0478260869565	0.967032967033	0.032967032967	19.9090909091	1	1.09090909091	0.0371900826446
an official term used formally in Brazil to describe someone of multiracial origin	0.952173913043	0.0478260869565	0.967032967033	0.032967032967	19.9090909091	1	1.09090909091	0.0371900826446
mulatto	0.952173913043	0.0478260869565	0.967032967033	0.032967032967	19.9090909091	1	1.09090909091	0.0371900826446
leopard or other large cat	0.952173913043	0.0478260869565	0.967032967033	0.032967032967	19.9090909091	1	1.09090909091	0.0371900826446
yearling	0.952181365496	0.047818634504	0.964332355457	0.0356676445426	139.386446886	7	12.6135531136	0.466535967944
uncastrated m. pig	0.952380952381	0.047619047619	0.977777777778	0.0222222222222	20.0	1	1.0	0.0227272727273
fur breeches	0.952380952381	0.047619047619	0.99604743083	0.00395256916996	20.0	1	3.0	0.0119047619048
overgrown	0.952380952381	0.047619047619	0.99604743083	0.00395256916996	20.0	1	3.0	0.0119047619048
countryside	0.952422907489	0.047577092511	0.977547806524	0.0224521934758	60.0555555556	3	3.94444444444	0.0905954974582
(coll.) any farm bird	0.952488687783	0.0475113122172	0.997732426304	0.00226757369615	20.0476190476	1	0.952380952381	0.0021645021645
(to bend) thread	0.952497952498	0.047502047502	0.99947117927	0.000528820729773	40.1034482759	2	2.89655172414	0.00153256704981
bunch of grapes	0.952631578947	0.0473684210526	0.965806783882	0.0341932161181	60.3333333333	3	3.66666666667	0.129813879814
fruit-tree	0.952727272727	0.0472727272727	0.960317460317	0.0396825396825	20.1538461538	1	0.846153846154	0.034965034965
body hair	0.952856279419	0.047143720581	0.955010574376	0.0449894256237	121.27039627	6	7.7296037296	0.364132546198
plowing	0.952912767884	0.0470872321159	0.975960284909	0.024039715091	141.66025641	7	12.3397435897	0.303950811094
wooden plow	0.953015822022	0.0469841779777	0.981022454174	0.0189775458259	202.837606838	10	10.1623931624	0.196588040487
m. fox	0.953051643192	0.0469483568075	0.916666666667	0.0833333333333	20.3	1	0.7	0.0636363636364
animal fur	0.953237410072	0.0467625899281	0.616071428571	0.383928571429	20.3846153846	1	1.61538461538	1.00668896321
brazen	0.953313253012	0.046686746988	0.994997057092	0.00500294290759	61.2580645161	3	4.74193548387	0.0238429172511
furrow	0.953366557771	0.0466334422289	0.558845886721	0.441154113279	286.213737843	14	61.7862621574	48.7742047362
crag	0.953395503123	0.046604496877	0.9954263384	0.0045736615997	102.285784314	5	9.71421568627	0.044633674579
grape	0.953400927796	0.046599072204	0.543157511689	0.456842488311	409.193094498	20	82.8069055015	69.6477760955
to crush	0.953405017921	0.0465949820789	0.995670995671	0.004329004329	20.4615384615	1	1.53846153846	0.0066889632107
club-shaped instrument in a mortar	0.953405017921	0.0465949820789	0.995670995671	0.004329004329	20.4615384615	1	1.53846153846	0.0066889632107
fluff	0.953405017921	0.0465949820789	0.995670995671	0.004329004329	20.4615384615	1	1.53846153846	0.0066889632107
hair (animal & human)	0.953405017921	0.0465949820789	0.995670995671	0.004329004329	20.4615384615	1	1.53846153846	0.0066889632107
hair (on body)	0.953405017921	0.0465949820789	0.995670995671	0.004329004329	20.4615384615	1	1.53846153846	0.0066889632107
the foreleg of an animal used as food	0.953405017921	0.0465949820789	0.995670995671	0.004329004329	20.4615384615	1	1.53846153846	0.0066889632107
(castrated) m. pig	0.953488372093	0.046511627907	0.997933884298	0.00206611570248	20.5	1	1.5	0.00310559006211
y. (infertile?) sow	0.953488372093	0.046511627907	0.997933884298	0.00206611570248	20.5	1	1.5	0.00310559006211
gilt	0.953488372093	0.046511627907	0.997933884298	0.00206611570248	20.5	1	1.5	0.00310559006211
property	0.953499891843	0.0465001081572	0.99717444546	0.00282555454	225.558589559	11	24.4414104414	0.0692562254792
body	0.953630845324	0.0463691546763	0.982505113347	0.0174948866526	102.83030303	5	6.1696969697	0.10986013986
halberd	0.953680287502	0.0463197124983	0.97853163118	0.0214683688198	164.712643678	8	6.28735632184	0.137940645062
bag made from skin	0.953684210526	0.0463157894737	0.998482549317	0.00151745068285	41.1818181818	2	3.81818181818	0.00580270793037
wicker basket, esp. for carrying on the back	0.953684210526	0.0463157894737	0.998482549317	0.00151745068285	41.1818181818	2	3.81818181818	0.00580270793037
basket	0.953684210526	0.0463157894737	0.998482549317	0.00151745068285	41.1818181818	2	3.81818181818	0.00580270793037
dagger	0.953700935035	0.0462990649654	0.891381926653	0.108618073347	288.381916578	14	14.618083422	1.78126570647
fruits	0.953727506427	0.0462724935733	0.986958054283	0.0130419457173	41.2222222222	2	2.77777777778	0.0367063492063
goat (dim)	0.953846153846	0.0461538461538	0.965034965035	0.034965034965	20.6666666667	1	1.33333333333	0.048309178744
goatskin	0.953846153846	0.0461538461538	0.965034965035	0.034965034965	20.6666666667	1	1.33333333333	0.048309178744
roofer?s hammer	0.953846153846	0.0461538461538	0.992063492063	0.00793650793651	20.6666666667	1	3.33333333333	0.0266666666667
s. box	0.953947368421	0.0460526315789	0.99043062201	0.00956937799043	20.7142857143	1	1.28571428571	0.0124223602484
object made from boxwood	0.953947368421	0.0460526315789	0.99043062201	0.00956937799043	20.7142857143	1	1.28571428571	0.0124223602484
box tree	0.953947368421	0.0460526315789	0.99043062201	0.00956937799043	20.7142857143	1	1.28571428571	0.0124223602484
evergreen shrub or tree of the genus Buxus	0.953947368421	0.0460526315789	0.99043062201	0.00956937799043	20.7142857143	1	1.28571428571	0.0124223602484
cartridge	0.953947368421	0.0460526315789	0.99043062201	0.00956937799043	20.7142857143	1	1.28571428571	0.0124223602484
boxwood	0.953947368421	0.0460526315789	0.99043062201	0.00956937799043	20.7142857143	1	1.28571428571	0.0124223602484
the wood of the box tree	0.953947368421	0.0460526315789	0.99043062201	0.00956937799043	20.7142857143	1	1.28571428571	0.0124223602484
dowel	0.953947368421	0.0460526315789	0.99043062201	0.00956937799043	20.7142857143	1	1.28571428571	0.0124223602484
container with flat sides and typically made of wood or card	0.953947368421	0.0460526315789	0.99043062201	0.00956937799043	20.7142857143	1	1.28571428571	0.0124223602484
s. forest	0.954022988506	0.0459770114943	0.998482549317	0.00151745068285	41.5	2	3.5	0.00531914893617
flesh of hunted animal	0.954128440367	0.045871559633	0.998109640832	0.00189035916824	20.8	1	2.2	0.00416666666667
the art of to hunt	0.954128440367	0.045871559633	0.998109640832	0.00189035916824	20.8	1	2.2	0.00416666666667
hunt, game	0.954128440367	0.045871559633	0.998109640832	0.00189035916824	20.8	1	2.2	0.00416666666667
quarry	0.954128440367	0.045871559633	0.998109640832	0.00189035916824	20.8	1	2.2	0.00416666666667
deer flesh	0.954128440367	0.045871559633	0.998109640832	0.00189035916824	20.8	1	2.2	0.00416666666667
to hunt, spoils of the to hunt, game	0.954128440367	0.045871559633	0.998109640832	0.00189035916824	20.8	1	2.2	0.00416666666667
(obs.) penis	0.95444191344	0.0455580865604	0.52380952381	0.47619047619	20.95	1	0.05	0.0454545454545
to feed	0.954496643744	0.0455033562555	0.982737382112	0.0172626178875	146.834806397	7	10.1651936027	0.178560270638
y. goat	0.954638343235	0.0453616567654	0.66041439544	0.33958560456	147.315351315	7	14.6846486846	7.55085797001
sharp tool	0.954672635702	0.0453273642977	0.97241842477	0.0275815752298	63.1851851852	3	2.81481481481	0.0798391151332
shafts)	0.954732510288	0.0452674897119	0.732394366197	0.267605633803	21.0909090909	1	2.90909090909	1.06293706294
bug (gen.)	0.954929577465	0.0450704225352	0.970779220779	0.0292207792208	21.1875	1	0.8125	0.0244565217391
crane fly	0.954929577465	0.0450704225352	0.970779220779	0.0292207792208	21.1875	1	0.8125	0.0244565217391
fan	0.95498392283	0.0450160771704	0.958333333333	0.0416666666667	21.2142857143	1	0.785714285714	0.0341614906832
tadpole	0.95498392283	0.0450160771704	0.958333333333	0.0416666666667	21.2142857143	1	0.785714285714	0.0341614906832
paddle wheel	0.955017301038	0.0449826989619	0.978723404255	0.0212765957447	21.2307692308	1	1.76923076923	0.0384615384615
scoop	0.955017301038	0.0449826989619	0.978723404255	0.0212765957447	21.2307692308	1	1.76923076923	0.0384615384615
he-goat	0.955018768802	0.0449812311979	0.865367924002	0.134632075998	169.851957071	8	9.14804292929	1.42323279697
saw	0.955033724706	0.0449662752935	0.548336664866	0.451663335134	106.194444444	5	55.8055555556	45.9668757467
monster	0.955069719401	0.0449302805991	0.990444803985	0.00955519601522	127.540229885	6	12.4597701149	0.120204119678
antelope	0.955094991364	0.0449050086356	0.9726443769	0.0273556231003	42.5384615385	2	2.46153846154	0.0692307692308
to furrow	0.955125992406	0.0448740075941	0.982193946695	0.0178060533052	42.5692307692	2	3.43076923077	0.0621959237344
battle axe used especially by the Irish down to the 16th century	0.955223880597	0.044776119403	0.965034965035	0.034965034965	21.3333333333	1	0.666666666667	0.024154589372
to resound	0.955271565495	0.0447284345048	0.940909090909	0.0590909090909	21.3571428571	1	0.642857142857	0.0403726708075
to name	0.955271565495	0.0447284345048	0.940909090909	0.0590909090909	21.3571428571	1	0.642857142857	0.0403726708075
m. bird of any species	0.955271565495	0.0447284345048	0.940909090909	0.0590909090909	21.3571428571	1	0.642857142857	0.0403726708075
to invite	0.955271565495	0.0447284345048	0.940909090909	0.0590909090909	21.3571428571	1	0.642857142857	0.0403726708075
summon	0.955271565495	0.0447284345048	0.940909090909	0.0590909090909	21.3571428571	1	0.642857142857	0.0403726708075
to invoke	0.955271565495	0.0447284345048	0.940909090909	0.0590909090909	21.3571428571	1	0.642857142857	0.0403726708075
to announce	0.955271565495	0.0447284345048	0.940909090909	0.0590909090909	21.3571428571	1	0.642857142857	0.0403726708075
cockerel	0.955271565495	0.0447284345048	0.940909090909	0.0590909090909	21.3571428571	1	0.642857142857	0.0403726708075
young of the goat	0.955465587045	0.0445344129555	0.338235294118	0.661764705882	21.4545454545	1	0.545454545455	1.06719367589
snout	0.955472942755	0.0445270572451	0.990890875705	0.00910912429546	193.124293785	9	19.8757062147	0.182714648816
trickster	0.955545156762	0.0444548432382	0.940746268657	0.0592537313433	42.9894736842	2	2.01052631579	0.12663476874
cheat	0.955545156762	0.0444548432382	0.940746268657	0.0592537313433	42.9894736842	2	2.01052631579	0.12663476874
spigot	0.955621301775	0.0443786982249	0.998109640832	0.00189035916824	21.5333333333	1	1.46666666667	0.00277777777778
to leap	0.955627009646	0.0443729903537	0.999639379733	0.000360620266859	64.6086956522	3	9.39130434783	0.00338791643139
to spurt out	0.955627009646	0.0443729903537	0.999639379733	0.000360620266859	64.6086956522	3	9.39130434783	0.00338791643139
y. of red deer	0.95564516129	0.0443548387097	0.871212121212	0.128787878788	21.5454545455	1	0.454545454545	0.0671936758893
y. of roedeer	0.95564516129	0.0443548387097	0.871212121212	0.128787878788	21.5454545455	1	0.454545454545	0.0671936758893
to bind	0.955729166667	0.0442708333333	0.955489614243	0.0445103857567	43.1764705882	2	0.823529411765	0.0383631713555
panicle (of oats)	0.955764075067	0.044235924933	0.989247311828	0.010752688172	43.2121212121	2	2.78787878788	0.030303030303
w. grape	0.95592048401	0.0440795159896	0.956672443674	0.0433275563258	65.0588235294	3	0.941176470588	0.0426257459506
shoe	0.955927051672	0.0440729483283	0.999005964215	0.000994035785288	65.0689655172	3	6.93103448276	0.00689655172414
wealth	0.956042625333	0.043957374667	0.995072850431	0.004927149569	239.242424242	11	19.7575757576	0.0978305566635
piece of iron	0.956043956044	0.043956043956	0.836363636364	0.163636363636	21.75	1	0.25	0.0489130434783
wagon	0.956090707151	0.0439092928488	0.577001123215	0.422998876785	195.968001443	9	72.031998557	52.806577416
late summer	0.956120092379	0.0438799076212	0.836363636364	0.163636363636	21.7894736842	1	0.210526315789	0.0411899313501
late autumn	0.956120092379	0.0438799076212	0.836363636364	0.163636363636	21.7894736842	1	0.210526315789	0.0411899313501
autumn (early)	0.956120092379	0.0438799076212	0.836363636364	0.163636363636	21.7894736842	1	0.210526315789	0.0411899313501
to join	0.95618970665	0.0438102933496	0.98950671449	0.0104932855104	130.954116059	6	7.04588394062	0.0747185145681
point	0.956247834845	0.0437521651548	0.984729213234	0.0152707867658	109.280058651	5	9.71994134897	0.150732962648
raven (?)	0.956422018349	0.0435779816514	0.0477178423237	0.952282157676	21.9473684211	1	0.0526315789474	1.05034324943
black	0.95652173913	0.0434782608696	0.0	1.0	22.0	1	0.0	0.0503432494279
idol	0.95652173913	0.0434782608696	0.986419486958	0.0135805130416	44.0	2	4.0	0.0550699300699
to divide	0.956577992515	0.0434220074846	0.991399084929	0.00860091507081	242.327762515	11	24.6722374847	0.214044800362
duck (gen.)	0.956581263446	0.0434187365539	0.569554026749	0.430445973251	44.0630630631	2	6.93693693694	5.24265729144
sow together	0.956611570248	0.0433884297521	0.993788819876	0.00621118012422	22.0476190476	1	0.952380952381	0.00595238095238
fetter (for tying the legs of an animal)	0.956611570248	0.0433884297521	0.993788819876	0.00621118012422	22.0476190476	1	0.952380952381	0.00595238095238
mead	0.956739361893	0.043260638107	0.39752152172	0.60247847828	132.694209391	6	32.3057906089	48.962238526
herd	0.95677086197	0.0432291380296	0.984314187539	0.0156858124606	398.385818002	18	26.6141819976	0.424117698282
channel	0.957083203254	0.0429167967463	0.983305165918	0.0166948340817	133.805401495	6	9.19459850494	0.156108502028
m. animal	0.957177904988	0.0428220950115	0.977698428047	0.0223015719535	134.114583333	6	7.88541666667	0.179868538324
breed of sheep	0.957317073171	0.0426829268293	0.996376811594	0.0036231884058	22.4285714286	1	1.57142857143	0.00571428571429
animal not usually consumed by man	0.957317073171	0.0426829268293	0.996376811594	0.0036231884058	22.4285714286	1	1.57142857143	0.00571428571429
s. animal	0.957317073171	0.0426829268293	0.996376811594	0.0036231884058	22.4285714286	1	1.57142857143	0.00571428571429
war scythe	0.957352941176	0.0426470588235	0.996632996633	0.003367003367	89.7931034483	4	10.2068965517	0.0344827586207
(specialised) wheat	0.95737704918	0.0426229508197	0.602409638554	0.397590361446	22.4615384615	1	1.53846153846	1.01538461538
pith of a tree	0.957453992909	0.042546007091	0.990833750351	0.00916624964909	90.0158730159	4	6.98412698413	0.0646104873747
pork	0.95750974333	0.0424902566695	0.988779234153	0.0112207658473	315.487301263	14	17.5126987375	0.198735860444
grain for fodder	0.957516339869	0.0424836601307	0.989583333333	0.0104166666667	22.5384615385	1	1.46153846154	0.0153846153846
cereal(gen.)	0.957516339869	0.0424836601307	0.989583333333	0.0104166666667	22.5384615385	1	1.46153846154	0.0153846153846
to enjoy (the agricultural produce of)	0.957516339869	0.0424836601307	0.989583333333	0.0104166666667	22.5384615385	1	1.46153846154	0.0153846153846
to practice	0.957516339869	0.0424836601307	0.989583333333	0.0104166666667	22.5384615385	1	1.46153846154	0.0153846153846
a species of wheat	0.957516339869	0.0424836601307	0.989583333333	0.0104166666667	22.5384615385	1	1.46153846154	0.0153846153846
thicket	0.957634598411	0.0423654015887	0.917006406523	0.082993593477	45.2083333333	2	2.79166666667	0.252659574468
battlefield	0.957671957672	0.042328042328	0.979007633588	0.0209923664122	45.25	2	4.75	0.101851851852
penis	0.957671984286	0.0423280157139	0.956535800801	0.0434641991993	203.62513369	9	6.37486631016	0.289668676218
woven material	0.957677419355	0.0423225806452	0.911490621125	0.0885093788745	90.512195122	4	10.487804878	1.01840773125
to endeavour	0.957777777778	0.0422222222222	0.894409937888	0.105590062112	22.6842105263	1	0.315789473684	0.0372807017544
to hurry	0.957777777778	0.0422222222222	0.894409937888	0.105590062112	22.6842105263	1	0.315789473684	0.0372807017544
to drive	0.957777777778	0.0422222222222	0.894409937888	0.105590062112	22.6842105263	1	0.315789473684	0.0372807017544
to attach	0.957899606755	0.0421003932454	0.982032565974	0.0179674340258	45.5054945055	2	3.49450549451	0.0639360639361
filament	0.95795903701	0.0420409629896	0.988892315456	0.011107684544	45.5726495726	2	2.42735042735	0.0272650948979
animal flesh	0.958017810626	0.0419821893742	0.988882230167	0.0111177698332	68.4588744589	3	3.54112554113	0.039812039812
curved broadsword	0.958076448829	0.0419235511714	0.985507246377	0.0144927536232	45.7058823529	2	3.29411764706	0.0484429065744
(fem.) cat	0.958125623131	0.0418743768694	0.85409252669	0.14590747331	45.7619047619	2	0.238095238095	0.0406746031746
spear esp. to used by a horseman	0.958174904943	0.041825095057	0.695652173913	0.304347826087	22.9090909091	1	0.0909090909091	0.0397727272727
head of a spear or arrow	0.958174904943	0.041825095057	0.695652173913	0.304347826087	22.9090909091	1	0.0909090909091	0.0397727272727
(a single) hair	0.958192852326	0.0418071476736	0.989898989899	0.010101010101	45.8387096774	2	3.16129032258	0.0322580645161
to rake	0.958192852326	0.0418071476736	0.989898989899	0.010101010101	45.8387096774	2	3.16129032258	0.0322580645161
hair (coll.)	0.958192852326	0.0418071476736	0.989898989899	0.010101010101	45.8387096774	2	3.16129032258	0.0322580645161
building	0.958241062955	0.0417589370452	0.996867030221	0.00313296977936	68.8409090909	3	7.15909090909	0.022499706366
hop (plant)	0.95825426945	0.0417457305503	0.521739130435	0.478260869565	22.9545454545	1	0.0454545454545	0.0416666666667
s. knife	0.958266675941	0.0417333240593	0.976620456507	0.0233795434932	68.885	3	3.115	0.0745707070707
fibre	0.958280657396	0.0417193426043	0.982109955423	0.0178900445765	68.9090909091	3	3.09090909091	0.056303778526
m. ruminant	0.958441558442	0.0415584415584	0.998722860792	0.00127713920817	46.125	2	2.875	0.00367647058824
stone (?)	0.958477508651	0.0415224913495	0.654983570646	0.345016429354	23.0833333333	1	1.91666666667	1.00961538462
garden	0.958552526702	0.0414474732983	0.971602081727	0.0283979182735	46.2538461538	2	1.74615384615	0.0510364635365
to saw	0.958616298812	0.0413837011885	0.939357521032	0.0606424789684	115.820512821	5	6.17948717949	0.398931623932
large piece of stone used for building, such as a pole or a lintel	0.958620689655	0.0413793103448	0.994782608696	0.00521739130435	23.1666666667	1	1.83333333333	0.00961538461538
to stone	0.958620689655	0.0413793103448	0.994782608696	0.00521739130435	23.1666666667	1	1.83333333333	0.00961538461538
fall	0.958620689655	0.0413793103448	0.994782608696	0.00521739130435	23.1666666667	1	1.83333333333	0.00961538461538
rock slip	0.958620689655	0.0413793103448	0.994782608696	0.00521739130435	23.1666666667	1	1.83333333333	0.00961538461538
flat stone used for roofing houses	0.958620689655	0.0413793103448	0.994782608696	0.00521739130435	23.1666666667	1	1.83333333333	0.00961538461538
falling down	0.958620689655	0.0413793103448	0.994782608696	0.00521739130435	23.1666666667	1	1.83333333333	0.00961538461538
lapidate	0.958620689655	0.0413793103448	0.994782608696	0.00521739130435	23.1666666667	1	1.83333333333	0.00961538461538
tomb	0.958620689655	0.0413793103448	0.994782608696	0.00521739130435	23.1666666667	1	1.83333333333	0.00961538461538
belly fat	0.95867768595	0.0413223140496	0.961538461538	0.0384615384615	23.2	1	0.8	0.032
greasy growth	0.95867768595	0.0413223140496	0.961538461538	0.0384615384615	23.2	1	0.8	0.032
rampart	0.95874355368	0.0412564463197	0.99663913415	0.00336086585019	46.4772727273	2	5.52272727273	0.0186237373737
lair	0.958783120707	0.0412168792934	0.998396793587	0.00160320641283	46.5238095238	2	4.47619047619	0.00718778077269
clod	0.958783120707	0.0412168792934	0.998396793587	0.00160320641283	46.5238095238	2	4.47619047619	0.00718778077269
wheaten	0.958794443136	0.0412055568637	0.975438899007	0.0245611009926	46.5371428571	2	2.46285714286	0.0620136054422
burrow	0.958861172783	0.0411388272169	0.99078971366	0.0092102863396	69.9238095238	3	5.07619047619	0.0471877807727
y. ox	0.958898695824	0.041101304176	0.975988947355	0.0240110526453	93.3205128205	4	5.67948717949	0.139725420083
rabbit (obsolete sense)	0.958904109589	0.041095890411	0.390625	0.609375	23.3333333333	1	0.666666666667	1.04
rabbit (?)	0.958904109589	0.041095890411	0.390625	0.609375	23.3333333333	1	0.666666666667	1.04
elephant	0.958932238193	0.041067761807	0.967261904762	0.0327380952381	23.35	1	0.65	0.022
king	0.958932238193	0.041067761807	0.967261904762	0.0327380952381	23.35	1	0.65	0.022
underground mountain	0.959016393443	0.0409836065574	0.9375	0.0625	23.4	1	0.6	0.04
rabbit skin or fur	0.959016393443	0.0409836065574	0.9375	0.0625	23.4	1	0.6	0.04
long narrow gallery	0.959016393443	0.0409836065574	0.9375	0.0625	23.4	1	0.6	0.04
underground passage	0.959016393443	0.0409836065574	0.9375	0.0625	23.4	1	0.6	0.04
deep excavation	0.959016393443	0.0409836065574	0.9375	0.0625	23.4	1	0.6	0.04
hill or tunnel	0.959016393443	0.0409836065574	0.9375	0.0625	23.4	1	0.6	0.04
fur of w. or domestic rabbits	0.959016393443	0.0409836065574	0.9375	0.0625	23.4	1	0.6	0.04
underground tunnel	0.959016393443	0.0409836065574	0.9375	0.0625	23.4	1	0.6	0.04
bank	0.959016393443	0.0409836065574	0.9984	0.0016	23.4	1	1.6	0.0025641025641
settlement	0.959016393443	0.0409836065574	0.9984	0.0016	23.4	1	1.6	0.0025641025641
woods/forest	0.959016393443	0.0409836065574	0.9984	0.0016	23.4	1	1.6	0.0025641025641
mountain (not hill)	0.959016393443	0.0409836065574	0.9984	0.0016	23.4	1	1.6	0.0025641025641
bow (arcery)	0.959107806691	0.0408921933086	0.599728629579	0.400271370421	23.4545454545	1	1.54545454545	1.03146853147
family	0.959119496855	0.0408805031447	0.985915492958	0.0140845070423	46.9230769231	2	1.07692307692	0.0153846153846
navel (of body or the world)	0.959119496855	0.0408805031447	0.985915492958	0.0140845070423	46.9230769231	2	1.07692307692	0.0153846153846
corner	0.959138187221	0.0408618127786	0.988981132075	0.0110188679245	46.9454545455	2	3.05454545455	0.0340326340326
horse (lit.)	0.959227467811	0.0407725321888	0.314245810056	0.685754189944	23.5263157895	1	0.473684210526	1.03368421053
m. of large horned animals	0.959229898075	0.0407701019253	0.964812712826	0.0351872871737	47.0555555556	2	0.944444444444	0.0344444444444
bow (between cart-shafts)	0.959259259259	0.0407407407407	0.978823529412	0.0211764705882	23.5454545455	1	1.45454545455	0.0314685314685
rim	0.959259259259	0.0407407407407	0.978823529412	0.0211764705882	23.5454545455	1	1.45454545455	0.0314685314685
rainbow	0.959259259259	0.0407407407407	0.978823529412	0.0211764705882	23.5454545455	1	1.45454545455	0.0314685314685
hoop (of a barrel)	0.959259259259	0.0407407407407	0.978823529412	0.0211764705882	23.5454545455	1	1.45454545455	0.0314685314685
Gotland pony	0.959314775161	0.0406852248394	0.925925925926	0.0740740740741	23.5789473684	1	0.421052631579	0.0336842105263
medieval knight's warhorse	0.959314775161	0.0406852248394	0.925925925926	0.0740740740741	23.5789473684	1	0.421052631579	0.0336842105263
knight's horse	0.959314775161	0.0406852248394	0.925925925926	0.0740740740741	23.5789473684	1	0.421052631579	0.0336842105263
various forms of bladed weapon	0.959337349398	0.0406626506024	0.993963782696	0.00603621730382	47.1851851852	2	2.81481481481	0.017094017094
swamp	0.959390862944	0.0406091370558	0.994782608696	0.00521739130435	23.625	1	1.375	0.00721153846154
(dial.) forest	0.959390862944	0.0406091370558	0.994782608696	0.00521739130435	23.625	1	1.375	0.00721153846154
forest on mountain	0.959390862944	0.0406091370558	0.994782608696	0.00521739130435	23.625	1	1.375	0.00721153846154
marsh	0.959390862944	0.0406091370558	0.994782608696	0.00521739130435	23.625	1	1.375	0.00721153846154
cereal (gen.)	0.959488272921	0.0405117270789	0.892857142857	0.107142857143	23.6842105263	1	0.315789473684	0.0378947368421
to lengthen	0.959501557632	0.0404984423676	0.982222222222	0.0177777777778	23.6923076923	1	1.30769230769	0.0236686390533
build (of a person)	0.959501557632	0.0404984423676	0.982222222222	0.0177777777778	23.6923076923	1	1.30769230769	0.0236686390533
to pour away (int.)	0.959501557632	0.0404984423676	0.982222222222	0.0177777777778	23.6923076923	1	1.30769230769	0.0236686390533
oats (plant and grain)	0.959537572254	0.0404624277457	0.21613832853	0.78386167147	23.7142857143	1	0.285714285714	1.03619047619
flute (DH)	0.959615384615	0.0403846153846	0.868055555556	0.131944444444	23.7619047619	1	0.238095238095	0.0361904761905
oat field	0.959615384615	0.0403846153846	0.868055555556	0.131944444444	23.7619047619	1	0.238095238095	0.0361904761905
straw (MDV)	0.959615384615	0.0403846153846	0.868055555556	0.131944444444	23.7619047619	1	0.238095238095	0.0361904761905
oats (species of cereal)	0.959615384615	0.0403846153846	0.868055555556	0.131944444444	23.7619047619	1	0.238095238095	0.0361904761905
domain	0.959641255605	0.0403587443946	0.994997498749	0.00500250125063	47.5555555556	2	1.44444444444	0.00726216412491
territory	0.959641255605	0.0403587443946	0.994997498749	0.00500250125063	47.5555555556	2	1.44444444444	0.00726216412491
area	0.959641255605	0.0403587443946	0.994997498749	0.00500250125063	47.5555555556	2	1.44444444444	0.00726216412491
level plain	0.959641255605	0.0403587443946	0.994997498749	0.00500250125063	47.5555555556	2	1.44444444444	0.00726216412491
golden	0.959798994975	0.0402010050251	0.78125	0.21875	23.875	1	0.125	0.035
safflower	0.959798994975	0.0402010050251	0.78125	0.21875	23.875	1	0.125	0.035
comb	0.959850338178	0.0401496618218	0.982833727846	0.017166272154	71.7204301075	3	3.27956989247	0.0572812956326
hoe	0.959884604093	0.0401153959075	0.977685085215	0.0223149147851	454.633615478	19	30.3663845219	0.693089516436
grape (gen.)	0.96	0.04	0.491891891892	0.508108108108	24.0	1	1.0	1.03296703297
loathing	0.96	0.04	0.989010989011	0.010989010989	24.0	1	2.0	0.0222222222222
creeping animal	0.96	0.04	0.989010989011	0.010989010989	24.0	1	2.0	0.0222222222222
amphibian	0.96	0.04	0.989010989011	0.010989010989	24.0	1	2.0	0.0222222222222
scoundrel	0.96	0.04	0.989010989011	0.010989010989	24.0	1	2.0	0.0222222222222
leather bag	0.960036330609	0.0399636693915	0.923067085647	0.0769329143525	48.0454545455	2	1.95454545455	0.162901353965
vegetal fat	0.960096178442	0.0399038215583	0.99748868686	0.00251131313955	72.1807692308	3	6.81923076923	0.0171683389075
[truncated: 1,443 more rows]
